# Supplementary material for: Delayed Protein Changes During Seed Germination
Source: Front Plant Sci. 2021 Sep 15;12:735719. doi: 10.3389/fpls.2021.735719 (PMC8480309; doi:10.3389/fpls.2021.735719)
Supplement: Supplementary file 2 [file Data_Sheet_2.xlsx]

## Sheet: Read me
Supplemental Tables
Index
Supplemental Table 1. Total proteomic analysis during seed germination. Gene (TAIR) and Protein (Swiss-Prot) ID, the log2(LFQ) intensity, identified total and unique peptides and their respective coverage, the protein name are listed.
Supplemental Table 2. Protein recovery from methonal/chloroform method adopted in current research and the further revocery by acetone from the supernatant after methonal/chloroform precipitation.
Supplemental Table 3. Differential regulated genes at polyomal mRNA and protein level during seed germination
Supplemental Table 4. Delayed Response genes during seed germination and their repective changes at polyomal mRNA (poly) and protein level. The gene (TAIR) ID, the delayed group and protein description are listed. DUG and DDG represent Delayed Response Up-regulated Genes and the Delayed Response Down-regulated genes sets respectively.
Supplemental Table 5. GO enrichment analysis for the protein synthesis delayed genes during seed germination. GO Term, Gene count, P-Value, Fold Enrichment, False discovery rate, Delay group and the included genes from each GO are shown.
Supplemental Table 6. mRNA decay rate, half-life and mRNA length for the Delayed Response genes during seed germination and their repective changes at polyomal mRNA (poly) and protein level.
Supplemental Table 7. Protein decay rate and mRNA length for the Delayed Response genes during seed germination and their repective changes at polyomal mRNA (poly) and protein level.
Supplemental Table 8. Gene transcripts that with the identified motifs in the DUG set. Motif, gene ID, the Start and stop site, p-value and the enriched set are shown.
Supplemental Table 9. GO enrichment for the gene transcripts with corresponding motifs identifed.

## Sheet: Supplemental Table 1
AGI	Main protein	LFQ intensity dry1	LFQ intensity dry-2	LFQ intensity dry-3	LFQ intensity 6hr-1	LFQ intensity 6hr-2	LFQ intensity 6hr-3	LFQ intensity 26hr-1	LFQ intensity 26hr-2	LFQ intensity 26hr-3	LFQ intensity 48hr-1	LFQ intensity 48hr-2	LFQ intensity 48hr-3	LFQ intensity 72hr-1	LFQ intensity 72hr-2	LFQ intensity 72hr-3	Peptides	Unique peptides	Sequence coverage [%]	Unique sequence coverage [%]	Mol. weight [kDa]	Protein names
AT4G28520	Q96318	39.0493	38.9561	38.7732	38.9983	38.9723	38.8411	38.7015	38.6858	38.6438	37.9021	37.8526	37.7591	36.5611	36.7045	36.866	44	44	88	88	58.235	12S seed storage protein CRC;12S seed storage protein CRC alpha chain;12S seed storage protein CRC beta chain
AT5G44120	P15455	38.6563	38.5688	38.4412	38.5713	38.4357	38.3947	38.3361	38.3493	38.2739	37.6422	37.5677	37.5691	36.0669	36.201	36.4366	39	37	78.6	76.7	52.594	12S seed storage protein CRA1;12S seed storage protein CRA1 alpha chain;12S seed storage protein CRA1 beta chain
AT1G03880	P15456	38.0669	37.9438	37.8583	37.9381	37.934	37.8495	37.8042	37.788	37.711	36.7547	36.7687	36.7731	35.2274	35.2238	35.251	33	31	80.7	78.7	50.558	12S seed storage protein CRB;12S seed storage protein CRB alpha chain;12S seed storage protein CRB beta chain
AT4G27160	P15459	37.2203	37.1308	37.0649	37.3147	36.9812	37.0704	37.1453	37.1526	37.1542	36.6121	36.3502	36.4742	34.3814	34.6035	34.8361	10	5	44.5	28.7	18.762	2S seed storage protein 3;2S seed storage protein 3 small subunit;2S seed storage protein 3 large subunit
AT3G22640	Q9LUJ7	35.457	35.2613	35.1958	35.7028	35.5651	35.5491	35.5238	35.5902	35.3792	34.7632	34.6702	34.5986	34.2363	34.287	34.1635	38	38	74.9	74.9	55.062
AT1G03890	Q9ZWA9	35.5912	35.5373	35.4572	35.5565	35.4475	35.4875	35.2514	35.2796	35.2914	34.6796	34.6166	34.6823	33.696	33.7665	33.7998	30	30	74.3	74.3	49.674	12S seed storage protein CRD;12S seed storage protein CRD alpha chain;12S seed storage protein CRD beta chain
AT2G28490	Q9SK09	35.4965	35.4451	35.4724	35.493	35.4382	35.4246	35.1865	35.2909	35.2328	34.3764	34.544	34.4647	33.526	33.6011	33.7262	19	19	36.8	36.8	55.704
AT5G54740	Q9FH31	34.664	34.686	34.746	34.9145	34.7092	34.7636	34.9241	35.1812	34.9927	34.1256	33.9373	33.9212	32.0558	32.2561	32.5931	10	10	35.8	35.8	18.871	2S seed storage protein 5;2S seed storage protein 5 small subunit;2S seed storage protein 5 large subunit
AT1G07930	Q8W4H7	33.4573	33.4667	33.5376	33.4491	33.4238	33.4764	33.7946	33.7782	33.6837	33.9577	33.9715	33.8372	33.9162	33.9342	33.8481	29	29	65.7	65.7	49.502	Elongation factor 1-alpha 2;Elongation factor 1-alpha 4;Elongation factor 1-alpha 3;Elongation factor 1-alpha 1;Elongation factor 1-alpha
AT1G14950	Q39132	34.361	34.3299	34.4207	34.4166	34.4035	34.3194	34.0266	34.0244	34.0247	33.3547	33.1919	33.1902	32.355	32.3389	32.3984	20	19	90.3	90.3	17.892
AT1G54870	Q9FZ42	34.3449	34.3829	34.523	34.502	34.3867	34.3794	34.1827	34.2036	34.156	33.0223	32.9579	32.9822	31.0893	31.103	31.3216	36	36	95.1	95.1	31.387	Glucose and ribitol dehydrogenase homolog 1
AT3G21370	Q9LIF9	34.3657	34.3163	34.3438	34.5533	34.458	34.4985	34.0184	33.8918	33.9696	32.9174	32.6735	32.6482	31.1377	31.1766	31.2707	31	30	68.1	68.1	60.014	Beta-glucosidase 19
AT4G27170	P15460	34.1686	33.8898	33.5462	34.1237	33.9332	33.688	34.0266	33.8622	33.9219	33.2818	32.9468	32.7334	31.6274	31.9174	31.7066	9	7	36.7	36.7	19.169	2S seed storage protein 4;2S seed storage protein 4 small subunit;2S seed storage protein 4 large subunit
AT1G05510	Q9ZVY7	33.6988	33.7318	33.7168	33.67	33.7791	33.6698	33.3568	33.4791	33.4805	32.8655	32.7924	32.8605	32.4982	32.4543	32.4835	18	17	78	72.6	27.293
AT5G45690	Q941A4	33.5995	33.595	33.7526	33.6731	33.701	33.554	33.1392	33.2136	33.1138	32.6218	32.6287	32.5497	32.2167	32.2451	32.1724	23	23	88.7	88.7	27.846
ATCG00490	O03042	31.0985	31.2638	31.1078	31.2571	31.2855	30.9468	31.2135	31.0774	31.1189	33.2622	33.264	33.3837	34.571	34.6267	34.6292	38	38	64.5	64.5	52.954	Ribulose bisphosphate carboxylase large chain
AT3G15670	Q9LW12	33.858	34.0125	33.9651	33.9472	33.947	33.9218	33.2478	33.3939	33.3883	32.0837	31.8092	31.9644	30.4691	30.3719	30.3289	21	21	67.1	67.1	24.186
AT4G36700	F4JQG6	32.9239	33.1816	33.2432	33.3287	33.2321	33.2756	33.3568	33.4681	33.3861	33.1354	33.063	33.0447	32.4252	32.6048	32.566	17	17	36.8	36.8	59.084
AT3G04120	P25858	32.996	32.9655	32.9709	32.7275	32.7004	32.7364	32.8682	32.7161	32.8528	33.0069	32.8985	32.906	33.326	33.3189	33.436	29	4	84	21	36.914	Glyceraldehyde-3-phosphate dehydrogenase GAPC1, cytosolic
AT3G21720	P28297	29.3633	29.4728	29.3795	29.9585	29.7067	29.9781	31.8385	31.7008	31.6341	33.9472	33.8872	33.9545	33.8156	33.792	33.8633	36	36	81.6	81.6	64.244	Isocitrate lyase
AT2G42560	Q9SIN3	33.7715	33.8503	33.9995	33.7503	33.8629	33.7202	33.1768	33.2059	33.2539	30.9644	30.5946	30.6831	27.4492	26.9842	28.0884	35	35	64.4	64.4	67.195
AT4G24190	F4JQ55	32.3345	32.1296	32.1694	32.4579	32.2413	32.4314	32.1331	32.245	32.371	33.4354	33.2792	33.3304	33.5136	33.398	33.319	29	27	38.2	35.6	94.148	Endoplasmin homolog
AT1G56070	Q9ASR1	32.3374	32.3848	32.4447	32.3182	32.3243	32.2489	32.9882	33.0049	32.95	33.3523	33.2209	33.2745	32.2342	32.4031	32.7545	51	32	75.3	47.7	93.89
AT3G52930	Q9LF98	32.3083	32.3861	32.3531	32.3443	32.2563	32.2087	32.08	32.0801	32.1588	32.9101	32.8772	32.8972	33.3905	33.4086	33.5368	33	21	80.7	51.7	38.539	Fructose-bisphosphate aldolase
AT5G38410	P10798	30.1682	30.2823	30.3732	29.8522	30.0982	29.8988	29.9539	29.9268	29.785	32.0872	32.2399	32.0713	34.6276	34.5257	34.284	20	5	64.1	23.8	20.284	Ribulose bisphosphate carboxylase small chain 3B, chloroplastic;Ribulose bisphosphate carboxylase small chain 2B, chloroplastic;Ribulose bisphosphate carboxylase small chain
AT4G35090	P25819	31.3932	30.986	30.8427	31.355	31.0943	31.4218	32.1694	32.2125	32.1764	32.8346	32.8911	32.9092	33.3931	33.4727	33.4129	29	16	77	53.3	56.931	Catalase-2;Catalase
AT5G40420	Q39165	32.6659	32.8798	32.7306	33.1527	32.9915	32.8251	33.0316	33.204	33.336	32.7568	31.8696	32.3144	27.9196	27.6131	27.9297	13	13	47.7	47.7	21.279	Oleosin 21.2 kDa
AT2G33150	Q56WD9	31.4403	31.4377	31.6775	31.6209	31.5265	31.5774	32.1783	32.1204	32.0889	32.875	32.8333	32.8261	33.0741	33.0822	33.0648	26	23	77.7	71	48.578	3-ketoacyl-CoA thiolase 2, peroxisomal
AT1G11910	O65390	32.7813	32.9404	32.814	32.8688	32.9059	32.8643	32.7533	32.6225	32.6631	31.9192	31.7464	31.8383	30.7454	31.1763	31.0533	21	18	58.7	52.6	54.613	Aspartic proteinase A1
AT3G16420	O04314	22.9448	24.0783	24.1314	22.6854	23.4378	22.2398	23.8764	22.9112	23.9988	32.1696	32.1054	31.9522	34.4289	34.3239	34.3406	23	19	92.3	81.9	32.158	PYK10-binding protein 1
AT3G17520	F4J573	32.8986	32.9898	33.0516	33.1183	33.0126	33.179	32.4678	32.4744	32.6372	31.7791	31.6165	31.8114	30.8748	30.8609	30.9488	19	19	45	45	32.559
AT1G16030	Q9S9N1	32.7815	32.8574	32.8778	33.1156	33.0967	33.0229	32.6154	32.5783	32.6088	31.2047	31.0066	31.0841	31.404	31.4328	31.4217	37	30	61.5	52.3	70.914	Heat shock 70 kDa protein 5
AT3G53040	Q9LF88	32.7985	32.8961	33.0069	32.9309	32.8841	33.0515	32.5132	32.5024	32.6478	31.7311	31.7499	31.8366	31.3182	31.1542	31.1208	25	22	56.8	53.2	52.084
AT4G38740	P34790	32.6484	32.656	32.7817	32.5362	32.8089	32.5881	32.2535	32.3253	32.3172	32.0049	31.9229	31.8889	31.8848	31.91	31.8699	12	6	87.8	59.3	18.373	Peptidyl-prolyl cis-trans isomerase CYP18-3
AT1G62290	Q8VYL3	32.6895	32.7495	32.773	32.6685	32.7766	32.7683	32.8233	32.68	32.6824	31.8308	31.7065	31.7468	30.1488	30.4338	30.6702	16	13	39.8	33.7	55.748	Aspartic proteinase A2
AT5G66400	F4K0K7	32.8878	32.882	32.8605	32.9957	32.8544	32.8256	31.8497	32.2233	32.2434	29.111	28.6494	28.8688	23.6082	24.2768	22.173	6	6	31.9	31.9	18.334	Dehydrin Rab18
AT5G03860	Q9LZC3	31.3166	31.0973	31.2596	31.3441	31.2745	31.3153	32.4654	32.4176	32.3509	32.8869	32.7825	32.7302	32.1442	32.3476	32.4409	46	46	79.7	79.7	63.886	Malate synthase
AT2G33070	O49326	33.033	32.9636	32.9424	32.947	32.9449	32.8387	32.4943	32.3631	32.4876	31.5176	31.2939	31.2821	30.1494	30.1813	30.3249	39	37	87.3	84.9	51.214	Nitrile-specifier protein 2
AT5G50600	P0DKC6	32.588	32.6423	32.5448	33.0388	32.6345	32.6865	32.7129	32.8556	33.1371	32.1134	31.1725	31.4257	24.4925	25.7834	27.53	27	27	80.8	80.8	39.086	11-beta-hydroxysteroid dehydrogenase 1B;11-beta-hydroxysteroid dehydrogenase 1A			AT5G50700
AT1G14930	Q96274	32.6397	32.6399	32.6715	32.7377	32.7437	32.5951	32.4556	32.4186	32.3296	31.8103	31.7009	31.5934	30.8616	30.7609	30.8011	15	15	79.4	79.4	17.892
AT1G47540	F4HTA0	32.5336	32.3509	32.2033	32.2407	32.4913	32.2225	32.4083	32.4557	32.3304	32.0406	31.9782	31.8589	30.8695	31.1486	31.3126	4	4	29.3	29.3	11.064	Defensin-like protein 192
AT5G17920	O50008	30.7418	30.7451	30.7319	30.5612	30.6876	30.6691	31.3088	31.1516	31.1594	32.9455	32.8186	32.7728	32.8567	32.7068	33.0613	47	25	67.7	43.4	84.356	5-methyltetrahydropteroyltriglutamate--homocysteine methyltransferase 1
AT3G21380	Q9LIF8	33.0849	33.0216	33.0728	33.0789	32.8857	33.051	32.1694	32.1091	32.2887	30.6544	30.1513	30.2517	28.1667	28.7276	28.6674	35	35	86.1	86.1	49.723	Jacalin-related lectin 36
AT1G21750	Q9XI01	32.1392	32.0295	32.1305	32.1816	32.1497	32.1852	31.6372	31.6426	31.7484	31.9182	31.9277	31.932	32.3279	32.1813	32.1507	33	29	71.9	68.9	55.601	Protein disulfide isomerase-like 1-1;Protein disulfide-isomerase
AT1G14940	Q39133	32.4761	32.5674	32.6433	32.6219	32.6582	32.5458	32.196	32.2942	32.2366	31.4482	31.3412	31.2347	30.2008	30.2855	30.4983	16	14	90.3	85.8	17.879
AT5G01670	Q8GXW0	32.7401	32.6747	32.6047	32.676	32.65	32.4845	32.1239	32.1043	32.1378	31.2006	31.0766	31.0241	30.3289	30.3794	30.4963	31	31	87.6	87.6	36.58
AT2G21490	Q96261	32.133	32.426	32.1527	32.4908	32.056	32.8531	32.3542	32.1948	32.5626	31.7355	31.2921	32.0165	30.6585	30.0804	30.5116	5	5	16.2	16.2	19.298	Probable dehydrin LEA
AT3G51810	Q07187	32.4509	33.2644	33.3302	33.4757	33.3929	32.826	31.4775	31.4982	31.8193	28.5838	27.5743	27.6339	23.6598	24.2794	25.2864	17	17	87.5	87.5	16.612	Em-like protein GEA1
AT3G09260	Q9SR37	22.769	21.9588	27.5045	23.4129	23.9072	24.1298	28.1214	28.2543	27.8834	32.1481	32.0597	31.9289	33.3166	33.8848	33.4546	27	22	65.5	58.4	59.72	Beta-glucosidase 23
AT2G38530	Q9S7I3	31.733	31.89	31.6878	31.8032	32.0514	31.449	32.1483	31.9736	31.8958	31.8643	31.6601	31.8431	31.7664	31.8652	31.7855	7	7	55.9	55.9	11.938	Non-specific lipid-transfer protein 2
AT1G48130	O04005	32.0065	31.9633	31.9535	32.057	32.0566	32.0301	32.2019	32.0003	31.8895	31.8422	31.7436	31.5724	31.1421	31.2737	31.0814	15	15	83.8	83.8	24.081	1-Cys peroxiredoxin PER1
AT5G02500	P22953	31.0138	30.8701	31.045	30.8398	31.2475	31.1858	31.6285	31.6351	31.4659	32.4819	32.3824	32.3565	31.8624	31.8354	31.8424	36	11	69.7	35	71.357	Probable mediator of RNA polymerase II transcription subunit 37e
AT2G36530	P25696	31.3878	31.4852	31.5529	31.5207	31.3641	31.4505	31.525	31.4476	31.4953	31.8535	31.8962	31.8232	32.1055	32.0697	32.0735	24	23	66.9	66.9	47.719	Bifunctional enolase 2/transcriptional activator
AT3G56350	Q9LYK8	32.2771	32.212	32.0637	32.2992	32.3161	32.3243	31.9643	31.7768	31.7	30.973	30.8928	30.7063	30.7425	30.6081	30.7229	12	12	68	68	26.891	Superoxide dismutase [Mn] 2, mitochondrial
AT5G56030	P55737	30.7866	30.8886	30.9328	30.9649	30.8556	30.8763	31.5296	31.551	31.4824	32.1864	32.0673	32.1987	31.5972	31.6151	31.7099	43	35	63.2	48.5	80.063	Heat shock protein 90-2;Heat shock protein 90-3;Heat shock protein 90-4
AT1G75830	P30224	32.3784	32.3548	31.7102	32.4524	32.5262	31.8189	32.2647	32.6689	32.425	30.3659	29.8877	29.8479	28.0743	28.2312	28.164	5	5	58.8	58.8	8.7092	Defensin-like protein 13
AT4G27440	P21218	24.7264	25.0787	24.7817	24.6388	25.214	24.6687	24.6971	24.7624	24.6485	31.1874	29.8353	31.1741	33.654	33.6628	33.0492	31	17	68.3	42.9	43.359	Protochlorophyllide reductase B, chloroplastic
AT1G55490	P21240	28.3742	28.7289	29.0014	28.3232	28.5761	28.4146	30.099	30.0317	29.7283	31.8451	31.9609	32.1005	33.1103	32.9447	32.8274	40	11	71	22.2	63.808	Chaperonin 60 subunit beta 1, chloroplastic
AT4G25140	P29525	31.2812	31.4059	31.6212	31.6817	31.5628	31.4732	31.6154	32.0581	31.8898	30.6163	29.7859	30.3268	25.8635	24.7867	26.1045	4	4	25.4	25.4	18.569	Oleosin 18.5 kDa
AT3G55440	P48491	31.6099	31.4869	31.4598	31.4028	31.5051	31.3817	31.341	31.236	31.2359	31.2226	31.3797	31.253	31.8991	31.7736	31.8576	22	21	88.6	85.4	27.169	Triosephosphate isomerase, cytosolic
AT4G13940	O23255	31.3762	31.4411	31.3942	31.1786	31.1622	30.9741	31.4775	31.4311	31.388	31.7427	31.7566	31.8985	31.2525	31.4088	31.5938	31	31	79.4	79.4	53.378	Adenosylhomocysteinase 1;Adenosylhomocysteinase
AT5G09810	P53492	31.3804	31.402	31.4459	31.5817	31.6594	31.3445	31.7653	31.7948	31.8296	31.4875	31.3473	31.4301	30.8777	30.989	31.1024	24	10	73.2	31.6	41.735	Actin-7
AT3G30190	A0A178V6F1	31.329	31.5561	31.6386	31.6461	31.6264	32.0044	31.6458	32.289	32.5791	31.1148	30.1583	30.9401	25.4576	25.4211	24.9903	13	13	36.6	36.6	20.313	Oleosin 20.3 kDa
AT2G28000	P21238	27.9031	28.7174	28.3219	27.9239	27.655	27.9319	29.3303	29.4365	29.2378	31.5802	31.6734	31.524	33.1977	33.0726	32.9277	39	39	76.8	76.8	62.071	Chaperonin 60 subunit alpha 1, chloroplastic
AT1G04410	P93819	30.6361	30.6205	30.8044	30.6883	30.6859	30.6832	31.08	30.9638	31.0216	31.966	31.8727	31.9008	31.9008	31.8545	31.9113	18	10	70.2	45.5	35.571	Malate dehydrogenase, cytoplasmic 1
AT3G05260	Q9MA93	32.2443	32.0914	32.1582	32.0722	32.0954	32.2474	31.8865	31.8377	31.8925	30.4891	30.1758	30.1957	27.6887	27.8495	27.3477	20	20	72.7	72.7	31.451	Glucose and ribitol dehydrogenase homolog 2
AT5G19510	Q9SCX3	30.3892	30.6817	30.6849	30.5899	30.4226	30.5247	30.947	30.9761	30.9819	31.5747	31.5646	31.5913	32.2619	32.1061	32.0509	12	9	50.4	46	24.201	Elongation factor 1-beta 2
AT1G79550	Q9SAJ4	30.7997	30.8855	30.9145	30.9384	30.9566	30.893	30.8682	30.8473	30.8751	31.4688	31.3571	31.4087	32.0484	32.1031	32.0978	30	28	80.5	80.5	42.131	Phosphoglycerate kinase
AT4G20850	F4JVN6	31.631	31.6918	31.7762	31.667	31.7427	31.4354	31.9259	31.9314	31.8684	31.186	31.0061	31.1364	29.6779	29.6214	29.9622	66	66	54.3	54.3	152.37	Tripeptidyl-peptidase 2
AT1G79690	Q8L831	31.8546	31.8419	31.9408	31.8138	31.8819	31.9128	31.7333	31.6839	31.7083	30.8956	30.6774	30.7832	29.9063	30.0725	30.0557	50	50	70.2	70.2	86.856	Nudix hydrolase 3
AT3G22500	Q9LJ95	32.4625	32.384	32.4402	32.4239	32.589	32.329	31.1239	31.0773	30.8424	24.7153	25.7506	25.6893	24.2939	23.7033	24.4287	14	14	86.3	86.3	26.779
AT4G23680	Q9SUQ9	30.2683	30.3963	30.4408	30.1858	30.2526	30.557	29.9117	30.1289	30.1655	30.3748	29.7345	29.8765	32.9239	32.857	32.5812	17	12	89.4	72.8	17.473
AT4G24280	Q9STW6	29.5702	29.8751	29.7674	30.0069	29.8285	30.0413	30.1604	30.1546	30.2241	31.361	31.51	31.4563	32.5958	32.5078	32.3363	42	19	51.1	23.8	76.507	Heat shock 70 kDa protein 6, chloroplastic
AT5G17310	P57751	31.5521	31.512	31.4997	31.5644	31.538	31.4378	31.1422	31.2369	31.2339	31.0118	30.9054	30.8445	30.994	30.9899	31.0083	39	20	90.6	54.9	51.919	UTP--glucose-1-phosphate uridylyltransferase 1
AT2G05710	Q9SIB9	29.2311	29.4703	29.5722	29.708	29.7726	29.9337	30.94	31.0054	30.9532	32.0735	32.0764	32.0872	31.4569	31.5869	31.8304	44	35	56.5	44.8	108.2	Aconitate hydratase 2, mitochondrial
AT4G37870	Q9T074	28.6227	28.242	28.9337	28.9819	29.0221	28.9481	31.3196	31.1014	31.0827	32.227	32.4017	32.3767	31.3359	31.3569	31.3972	40	40	68.6	68.6	73.404	Phosphoenolpyruvate carboxykinase [ATP]
AT4G39260	Q03251	30.638	30.7147	30.6445	30.7836	30.7196	30.8658	31.1239	31.2403	31.0362	31.5016	31.492	31.5748	31.2932	31.1697	31.5706	10	7	56.2	48.5	16.578	Glycine-rich RNA-binding protein 8
AT4G20360	P17745	28.7122	29.1999	29.1027	29.1358	29.1698	28.9156	29.6355	29.4458	29.4396	31.0554	31.1217	31.0149	32.6425	32.5373	32.4878	25	24	64.5	64.5	51.63	Elongation factor Tu, chloroplastic
AT5G22470	Q9FK91	31.5016	31.6047	31.6673	31.5462	31.6838	31.5307	31.6198	31.4663	31.5348	30.1826	30.0696	30.3445	28.0747	28.0527	28.6345	33	33	53.3	53.3	91.405	Poly [ADP-ribose] polymerase 3
AT5G42890	Q9FMN0	28.1766	27.6507	28.2946	28.1603	28.1726	28.2658	29.7437	29.869	29.8068	31.2628	31.2932	31.1723	32.6297	32.6032	32.3726	14	14	69.1	69.1	13.568
AT1G30230	A8MRC4	30.4621	30.6085	30.7726	30.5314	30.3357	30.4594	30.611	30.8237	30.7438	31.3493	31.2591	31.3218	31.6288	31.6063	31.4839	13	7	40.4	28.5	28.776	Elongation factor 1-delta 1
AT5G20290	Q93VG5	29.8862	30.1007	30.0816	29.8688	29.7425	29.7681	30.5014	30.6335	30.6442	31.7108	31.5237	31.4971	31.8467	31.7887	31.7551	15	15	48.2	48.2	24.993	40S ribosomal protein S8-1
AT5G08690	P83484	29.8948	29.8797	30.0456	30.343	29.8896	30.0888	30.0608	30.0388	30.4398	31.6957	31.5467	31.3119	32.0872	31.6484	31.716	32	31	71.2	69.2	59.712	ATP synthase subunit beta-2, mitochondrial;ATP synthase subunit beta-1, mitochondrial;ATP synthase subunit beta-3, mitochondrial
AT2G40170	Q02973	31.9713	32.1051	31.9946	31.983	32.138	31.9532	31.0608	31.1559	31.0981	28.8054	28.1867	28.5177	26.0472	24.3667	23.0325	6	6	58.7	58.7	9.9337	Em-like protein GEA6
AT3G46230	P19036	31.6059	31.5472	31.3759	31.6466	31.6848	31.4536	31.015	31.2215	31.1693	30.4188	30.3135	30.2997	28.9427	29.0556	29.1031	16	10	84.6	66.7	17.439	17.4 kDa class I heat shock protein
AT1G18080	O24456	30.8274	30.823	30.8858	30.545	30.5706	30.3655	30.9046	30.9356	30.7966	31.2513	31.1372	31.0032	30.9874	31.0431	31.0477	24	17	75.2	56.3	35.747	Receptor for activated C kinase 1A
AT4G09320	P39207	30.2422	30.3372	30.3349	30.2303	30.272	30.1115	30.4629	30.7127	30.4948	31.0636	31.1104	30.8421	31.7085	31.6424	31.4074	17	17	89.9	89.9	16.5	Nucleoside diphosphate kinase 1
AT5G20720	O65282	28.0637	27.9781	28.3998	28.4294	28.0419	28.1278	29.066	29.13	28.8272	30.8563	30.9954	30.8924	32.7273	32.6039	32.3523	15	15	66.8	66.8	26.802	20 kDa chaperonin, chloroplastic
AT5G38480	P42644	29.6293	29.5018	29.6878	29.7145	29.8441	29.7924	30.2759	30.2167	30.2838	31.4131	31.3211	31.3182	31.8043	31.7153	31.5658	16	8	85.5	58.4	28.606	14-3-3-like protein GF14 psi
AT3G45030	P49200	29.7422	29.789	29.9302	29.4816	29.5803	29.3045	29.9677	30.1341	30.01	31.3768	31.2506	31.1967	31.8719	31.7513	31.564	7	2	48.4	18.5	13.878	40S ribosomal protein S20-1
AT1G71695	Q96520	31.2924	31.3541	31.4705	31.4062	31.2942	31.3081	31.1901	30.8754	31.0526	30.3526	30.1505	30.1135	29.7396	29.553	29.7283	17	17	53.6	53.6	39.559	Peroxidase 12
AT5G01300	Q9M042	31.0829	31.2208	31.1712	31.1827	31.1815	31.0801	30.8534	30.7917	30.8625	30.4872	30.4018	30.3346	30.6855	30.6137	30.4921	9	9	46.9	46.9	17.823
ATCG00480	P19366	24.5574	26.0094	25.6854	25.0783	25.3641	25.6846	25.1833	25.1517	25.4255	30.3762	30.4557	30.0321	33.0707	32.7932	32.4216	36	35	83.9	81.7	53.933	ATP synthase subunit beta, chloroplastic
AT3G01570	Q9SS98	30.7379	31.288	31.1627	30.8825	31.2092	31.1926	31.4727	31.9403	31.7896	30.7006	29.721	30.5008	25.9226	23.8964	26.5704	8	8	30.1	30.1	19.754	Oleosin 5
AT5G42980	Q42403	30.6043	30.6523	30.7524	30.7156	30.6425	30.723	30.9539	30.8521	30.7614	30.8986	30.7257	30.728	30.9815	30.9473	31.015	16	16	87.3	87.3	13.109	Thioredoxin H3
AT1G67090	P10795	29.3588	29.2361	29.3628	29.4355	29.1609	29.2663	28.6146	28.7627	28.9471	30.0125	30.2335	30.3335	32.5563	32.4949	32.2984	19	12	63.9	51.7	20.216	Ribulose bisphosphate carboxylase small chain 1A, chloroplastic
AT1G65930	Q9SRZ6	30.8105	30.7875	30.8461	30.7928	30.6861	30.548	30.6458	30.7206	30.6637	30.9207	30.9087	30.8451	30.8285	30.7796	30.8021	27	25	64.6	60	45.746	Cytosolic isocitrate dehydrogenase [NADP]
AT3G13920	P41376	30.2319	30.3462	30.4411	30.1719	30.3442	30.1143	30.947	30.773	30.8958	31.248	31.1551	31.1186	30.7975	30.8012	30.9158	29	9	85.7	27.7	46.704	Eukaryotic initiation factor 4A-1
AT5G66570	P23321	23.9547	24.4676	24.429	24.7184	22.9487	23.7434	23.9336	24.2989	24.159	28.9256	28.9262	28.7149	33.2275	33.0113	32.6804	16	5	51.8	26.2	35.142	Oxygen-evolving enhancer protein 1-1, chloroplastic
AT1G72370	B9DG17	30.3301	30.4092	30.3972	30.0906	29.8678	30.021	30.5389	30.5859	30.5629	31.2989	31.2652	31.2201	30.9023	30.9803	31.0388	13	13	42.9	42.9	31.981	40S ribosomal protein SA;40S ribosomal protein Sa-1
AT3G11510	Q9CAX6	29.8418	29.7028	29.7037	29.5661	29.4876	29.4407	30.1361	30.2222	30.1865	31.0546	31.1881	31.0006	31.7174	31.6285	31.4296	12	1	72.7	7.3	16.273	40S ribosomal protein S14-2;40S ribosomal protein S14-3
AT2G21660	Q03250	29.6929	29.808	29.8074	29.7461	29.6666	29.9997	30.3088	30.2476	30.2887	31.2481	31.3312	31.2351	31.0907	31.0416	31.4451	11	8	60.2	52.8	16.89	Glycine-rich RNA-binding protein 7
AT3G09820	Q9SF85	30.4231	30.3492	30.4707	30.4898	30.3884	30.2838	30.5109	30.3932	30.386	30.9298	30.93	30.9181	31.1149	31.1002	31.1251	21	10	82.6	52.3	37.836	Adenosine kinase 1
AT4G27090	Q9T043	29.9505	30.0014	29.9833	29.552	29.3402	29.5844	29.9539	29.9863	29.9443	30.9852	30.8264	30.7511	31.8302	31.7756	31.3983	13	7	53	32.8	15.505	60S ribosomal protein L14-2
AT5G50920	Q9FI56	29.6883	29.7083	29.8828	29.5958	29.5699	29.5829	29.4314	29.5473	29.4506	30.752	30.7543	30.7172	31.9172	31.8661	31.813	49	20	55.8	25.1	103.45	Chaperone protein ClpC1, chloroplastic
AT5G07190	B9DGU8	30.5137	30.561	30.4617	31.1905	30.964	31.1967	30.9259	30.8607	31.0929	30.5821	30.3892	30.4388	30.196	30.2002	30.1374	7	7	45.4	45.4	19.874
AT3G06860	Q9ZPI5	28.7702	28.659	28.9063	29.0475	28.948	28.7711	30.5934	30.6044	30.4735	31.5788	31.3829	31.5066	30.964	31.1171	31.2495	38	38	74.5	74.5	78.839	Peroxisomal fatty acid beta-oxidation multifunctional protein MFP2;Enoyl-CoA hydratase/3-2-trans-enoyl-CoA isomerase/3-hydroxybutyryl-CoA epimerase;3-hydroxyacyl-CoA dehydrogenase
AT4G27140	P15457	31.7346	31.5806	29.9671	30.9797	31.5166	30.9606	30.7453	30.7641	30.5853	29.7977	28.8256	28.9566	28.9301	27.9592	28.7021	4	4	26.2	26.2	19.014	2S seed storage protein 1;2S seed storage protein 1 small subunit;2S seed storage protein 1 large subunit
AT2G34700	O64586	30.9547	31.0455	31.0283	31.1087	31.0218	30.9785	30.9746	30.9367	30.9012	30.14	30.0029	30.1689	29.6765	29.6014	29.8357	11	11	65.1	65.1	18.833
AT5G28540	Q9LKR3	30.3998	30.3923	30.3876	30.5671	30.5472	30.554	30.2647	30.3706	30.3792	31.018	30.9121	30.9301	30.7667	30.6879	30.5911	31	5	44.2	6.9	73.628	Mediator of RNA polymerase II transcription subunit 37a
AT1G53240	Q9ZP06	29.4507	29.7753	29.6308	29.889	29.6936	30.2323	30.0608	29.9805	30.066	31.0379	30.9931	30.8958	31.3688	31.4764	31.3898	16	9	58.4	36.4	35.804	Malate dehydrogenase 1, mitochondrial
AT1G65980	Q9XEX2	30.747	30.7371	30.7818	30.7885	30.6905	30.783	30.7047	30.6631	30.6828	30.4973	30.2666	30.4151	30.3505	30.3551	30.5765	15	14	88.9	88.9	17.428	Peroxiredoxin-2B
AT5G09590	Q9LDZ0	29.7036	30.0288	29.9871	30.3679	30.2949	30.3393	30.6714	30.7158	30.6845	31.0148	30.8842	30.8239	31.015	30.8593	30.6714	33	29	50.4	43.4	72.99	Heat shock 70 kDa protein 10, mitochondrial
AT3G49010	B9DGA4	29.2386	29.4385	29.5997	29.2018	29.0802	29.067	30.0217	30.0492	30.0282	31.1871	31.0297	30.9546	31.6213	31.58	31.5043	14	11	51	37.4	23.767	60S ribosomal protein L13;60S ribosomal protein L13-1
AT1G20620	Q42547	30.5939	30.6021	30.5859	30.4561	30.6745	30.5115	30.341	30.325	30.4674	30.5672	30.4084	30.3697	30.9888	30.9634	31.0529	27	19	58.1	45.3	56.695	Catalase-3
AT3G09630	Q9SF40	29.6514	29.6627	29.9107	29.4839	29.4035	29.294	30.4032	30.455	30.3788	31.3511	31.1944	31.1312	30.9233	31.0044	31.1789	17	7	45.3	18	44.702	60S ribosomal protein L4-1
AT2G36460	Q9SJQ9	30.2725	30.1091	30.3162	30.3486	30.4561	30.3449	30.4234	30.5321	30.5247	30.5045	30.5325	30.5511	31.1226	30.9798	30.894	28	16	81.6	52.5	38.386	Fructose-bisphosphate aldolase
AT3G15950	Q9LSB4	23.0943	25.5542	24.677	23.8233	22.5738	23.0997	23.7182	22.6368	24.0153	31.1682	31.0479	31.2259	32.9809	32.2462	31.0208	50	50	63	63	85.015	TSA1-like protein
AT3G17390	Q9LUT2	23.9505	24.5137	24.2859	24.2628	24.1363	24.2526	27.2625	27.0937	27.1466	31.3362	31.5682	31.5075	31.9609	32.1069	31.8029	19	12	62.6	45.8	42.795	S-adenosylmethionine synthase 4
AT1G11840	O65398	31.0484	30.9578	31.0534	31.0162	31.1777	30.8554	30.8004	30.6693	30.6549	30.0276	30.1675	29.9571	29.9389	29.8256	29.7807	14	13	43.8	43.8	31.928	Lactoylglutathione lyase
AT3G53430	Q9LFH5	29.4269	29.5756	29.7948	28.3874	29.0801	29.0662	29.995	29.9237	29.9818	30.9715	30.9387	30.8032	31.6568	31.6482	31.3253	7	1	59	21.1	17.97	60S ribosomal protein L12-2
AT4G23670	Q9SUR0	23.9942	24.078	22.5562	23.5057	23.635	22.2096	24.7604	23.1696	23.8143	27.9741	28.6794	28.2854	32.853	32.7204	32.4612	15	11	80.8	64.2	17.518
AT5G39570	Q9FKA5	28.6415	28.9996	28.7781	29.0196	28.546	29.1583	29.3239	28.7088	29.4273	30.79	30.3783	31.0744	31.9458	31.7261	31.9348	8	8	41.5	41.5	43.526	Uncharacterized protein At5g39570
AT1G33120	P49209	30.1328	30.0769	30.2193	29.3857	29.2542	29.4602	29.9259	29.8465	30.0112	30.899	30.8108	30.8226	31.08	31.2971	30.9572	14	11	64.9	55.2	22.017	60S ribosomal protein L9-1
AT4G02450	F4JHJ0	29.8033	29.7263	29.8204	29.8208	29.832	29.7125	30.1604	30.1806	29.9655	30.6629	30.689	30.658	31.3671	31.2972	31.3712	9	9	27.5	27.5	25.341
AT3G63110	Q93WC9	30.137	30.4048	30.4265	30.3767	30.458	30.3074	30.3515	30.4374	30.2943	30.7134	30.6415	30.6462	30.7528	30.6244	30.6431	2	2	7.1	7.1	37.914	Adenylate isopentenyltransferase 3, chloroplastic
AT1G57720	Q9FVT2	30.3554	30.4312	30.3417	30.3111	30.2838	30.1352	30.4433	30.4772	30.4415	30.7606	30.6736	30.7776	30.3028	30.3698	30.4789	21	13	55.2	29.5	46.4	Probable elongation factor 1-gamma 2
AT1G19570	Q9FWR4	30.4737	30.6733	30.5161	30.7596	30.6504	30.5165	30.4134	30.332	30.3524	30.4377	30.364	30.2919	30.4473	30.4228	30.3554	14	14	90.6	90.6	23.641	Glutathione S-transferase DHAR1, mitochondrial
AT5G44310	Q3E8H9	30.8082	31.0516	30.9495	30.8728	30.8407	31.0356	30.6285	30.6957	30.782	29.9084	29.7068	30.0149	29.8063	29.3127	29.376	8	8	32.2	32.2	33.36
AT3G16460	O04310	23.2608	24.9045	24.1553	23.3795	24.3414	23.4921	24.0876	22.9975	24.1253	30.8527	30.8812	30.6323	32.3951	32.1996	32.1587	32	32	55.9	55.9	72.473	Jacalin-related lectin 34
AT3G09840	P54609	30.3306	30.0721	30.1381	30.318	30.1153	30.1236	30.3303	30.4127	30.4491	30.9453	30.9175	30.8427	30.0737	30.2772	30.4696	37	37	56.2	56.2	89.392	Cell division control protein 48 homolog A;Cell division control protein 48 homolog E;Cell division control protein 48 homolog D
AT2G05990	Q9SLA8	30.7002	30.6814	30.5696	30.6233	30.7058	30.7704	30.2535	30.228	30.3914	29.9046	29.9556	29.9981	30.5481	30.458	30.3112	23	23	68.2	68.2	41.213	Enoyl-[acyl-carrier-protein] reductase [NADH], chloroplastic
AT1G07645	Q9LQP1	30.862	30.7342	30.854	30.8815	30.9944	30.8197	30.611	30.5437	30.5643	29.9521	29.8592	29.7774	29.7479	29.8162	29.952	12	12	83.9	83.9	15.388
AT1G70840	Q941R6	31.0387	31.3125	31.2385	31.1734	31.2194	31.0272	30.8682	30.8079	30.8081	29.4166	29.1671	29.1384	27.4241	27.5852	27.4509	12	9	80.1	64.3	19.138	MLP-like protein 31
AT2G19900	O82191	31.0298	30.987	31.0558	30.948	31.0613	30.896	30.7047	30.6175	30.6813	29.8655	29.8741	29.7554	28.5594	28.7318	28.6968	31	27	75.6	67.3	64.278	NADP-dependent malic enzyme 1
AT3G25520	A0A178V891	29.6857	29.6571	29.6127	29.4036	29.0652	29.4306	30.1115	29.9245	30.0724	30.9473	30.6095	30.6901	31.0872	31.062	30.9365	15	4	51.8	4.7	34.358	60S ribosomal protein L5-1
AT3G16640	P31265	29.463	29.7809	29.6905	29.617	29.6307	29.5695	29.8264	29.8325	29.8712	30.5312	30.6197	30.4436	31.3419	31.348	31.3858	13	13	87.5	87.5	18.91	Translationally-controlled tumor protein homolog
AT4G38970	Q944G9	29.1387	29.1368	29.1983	29.0104	29.2937	29.0441	28.7802	28.7089	28.7209	29.8555	29.8556	29.8653	32.0974	32.0073	31.7521	19	11	53	38.7	42.987	Probable fructose-bisphosphate aldolase 2, chloroplastic;Fructose-bisphosphate aldolase
AT3G09200	Q42112	29.8025	29.8067	29.7613	29.688	29.4561	29.1878	29.8973	29.8493	29.7612	30.5138	30.7475	30.3964	31.3685	31.2501	30.9144	17	4	75.9	16.9	34.133	60S acidic ribosomal protein P0-2
AT3G52960	Q949U7	30.3528	30.38	30.3429	30.5003	30.4289	30.2007	29.7341	29.732	29.6986	29.846	29.932	29.7909	31.3046	31.0381	30.9067	12	12	43.2	43.2	24.684	Peroxiredoxin-2E, chloroplastic
AT2G47610	P49692	29.473	29.4444	29.5459	29.2335	29.1193	29.2702	30.1483	30.0852	30.042	31.0311	30.9968	30.769	30.9222	30.8744	31.0242	14	3	51.8	10.9	29.129	60S ribosomal protein L7a-1
AT2G30970	P46643	27.8679	28.1847	27.4637	28.2773	27.8206	28.0131	30.099	30.0141	29.7051	31.6917	31.6645	31.5636	30.328	30.3974	31.0205	28	28	73.5	73.5	47.757	Aspartate aminotransferase, mitochondrial
AT5G10360	P51430	28.7188	29.1028	29.0409	28.8295	29.0403	29.2717	30.0608	30.1521	30.1407	31.0162	30.8401	30.8991	30.7378	30.7013	30.9108	14	7	43.8	24.1	28.162	40S ribosomal protein S6-2
AT2G16600	Q38900	29.6375	29.6671	29.6579	29.6765	29.5544	29.5606	29.995	30.0513	30.0178	30.6784	30.6507	30.4451	31.1228	31.2393	31.0973	14	11	77.5	72.8	18.492	Peptidyl-prolyl cis-trans isomerase CYP19-1
AT3G12780	Q9LD57	30.0197	30.1516	30.1442	29.9425	30.0469	30.1009	29.5718	29.4993	29.5012	29.7237	29.7665	29.816	31.5282	31.4443	31.3139	27	16	70.3	46.4	50.111	Phosphoglycerate kinase 1, chloroplastic
AT5G14780	Q9S7E4	30.4586	30.6708	30.7649	30.6702	30.7523	30.5827	30.6714	30.6149	30.5236	30.2257	30.1439	30.0655	29.6204	29.5634	29.5386	18	18	60.4	60.4	42.409	Formate dehydrogenase, mitochondrial
AT2G30860	O80852	27.9968	28.4492	28.3523	28.4528	28.1877	28.3516	29.6848	29.6623	29.5724	31.0449	31.0449	30.8472	31.4892	31.3202	31.3912	19	17	63.7	58.6	24.146	Glutathione S-transferase F9
AT1G74310	P42730	30.9862	31.0274	31.068	30.9321	31.0036	31.0222	30.5389	30.5153	30.5755	29.4738	29.6188	29.4869	28.8362	28.7132	28.8437	32	31	54.9	53.5	101.29	Chaperone protein ClpB1
AT5G20010	P41916	29.7582	29.8579	29.9376	29.7784	29.7998	29.6827	30.2869	30.3651	30.2469	30.6765	30.6633	30.5944	30.6955	30.746	30.6558	12	12	70.1	70.1	25.276	GTP-binding nuclear protein Ran-1;GTP-binding nuclear protein Ran-3;GTP-binding nuclear protein Ran-2
AT3G60750	Q8RWV0	30.0786	30.0961	30.0701	30.0985	30.1714	29.9724	29.6831	29.6995	29.6205	30.2037	30.1538	30.1193	31.0563	31.1458	31.1096	30	23	65.5	56.3	79.967	Transketolase-1, chloroplastic
AT3G22490	Q9LJ97	31.3139	31.5639	31.3798	31.5456	31.4987	31.2534	30.362	29.9288	30.6085	26.195	25.5322	26.0946	23.649	22.7383	24.5624	11	11	50.4	50.4	26.743
AT2G27710	Q9SLF7	29.1397	29.1319	29.1272	29.4578	29.2145	29.1291	29.5916	29.4464	29.5064	30.6456	30.4602	30.3358	31.6123	31.1301	30.8585	9	5	75.7	63.5	11.444	60S acidic ribosomal protein P2-2
AT3G51800	Q96327	29.952	29.9908	30.0795	29.9471	29.9461	29.8119	30.2647	30.1951	30.228	30.7351	30.6157	30.5718	30.3354	30.5252	30.4924	20	20	71	71	39.89	ERBB-3 BINDING PROTEIN 1
AT5G46290	P52410	30.5941	30.572	30.75	30.6808	30.5951	30.6258	30.2422	30.222	30.3008	29.9151	29.8263	29.9044	29.756	29.8618	29.8789	18	18	63.2	63.2	50.413	3-oxoacyl-[acyl-carrier-protein] synthase I, chloroplastic
AT4G21020	Q9SUB2	30.6118	30.7727	30.6437	30.6761	30.6123	30.7839	30.362	30.3227	30.4496	29.6739	29.6612	29.6345	29.5564	29.47	29.5849	7	7	24.4	24.4	29.422
AT2G47470	O22263	29.9087	29.9311	30.0342	30.1296	29.9698	30.0953	29.6612	29.8984	29.8342	30.4862	30.2627	30.3837	30.7868	30.6703	30.6152	17	17	51.8	51.8	39.496	Protein disulfide-isomerase like 2-1
AT5G07030	F4K5B9	30.352	30.2245	30.3321	30.326	30.5494	30.3831	30.8829	30.6674	30.7292	30.0548	29.8011	29.8956	29.4515	29.6525	29.6279	18	18	48.1	48.1	48.694
AT3G58450	F4J5V2	30.6459	30.6004	30.702	30.6058	30.5408	30.6608	30.3828	30.2807	30.3625	29.8819	29.7765	29.5538	28.9177	29.2428	29.5329	11	11	65	65	21.707
AT3G11630	Q96291	30.55	30.4558	30.5417	30.4448	30.1789	30.3655	29.341	29.5978	29.9406	29.6229	29.5998	29.9143	30.9389	30.6753	30.6293	13	5	54.9	32.7	29.092	2-Cys peroxiredoxin BAS1, chloroplastic
AT3G12580	Q9LHA8	30.3744	30.3569	30.6402	30.8504	30.8449	30.8175	30.4823	30.4583	30.4728	29.8608	29.6232	29.6802	28.7772	28.6222	28.97	34	14	58.8	24.9	71.101	Probable mediator of RNA polymerase II transcription subunit 37c
AT1G07890	Q05431	23.0882	23.4954	23.6844	24.6826	23.598	24.7388	23.7187	22.9071	23.9549	30.5934	30.6043	30.5038	31.9454	31.8714	31.8556	17	17	72.4	72.4	27.561	L-ascorbate peroxidase 1, cytosolic
AT3G48930	P16181	29.098	29.0408	29.0674	28.7423	28.7797	28.7038	29.8887	30.0514	29.895	31.0244	30.6288	30.7518	30.8123	30.7627	30.8762	9	6	45	36.2	17.957	40S ribosomal protein S11-1
AT2G36640	Q9SKP0	30.4954	30.6093	30.693	30.5831	30.6492	30.8055	30.4727	30.463	30.712	29.6469	29.4321	29.7888	28.7417	28.4473	28.6158	19	16	46	42.2	48.492
AT4G34870	Q42406	29.574	29.5262	29.4509	29.5865	29.6871	29.5249	29.7469	29.7204	29.7909	30.5012	30.413	30.4485	30.7895	30.7767	30.692	11	8	70.9	66.3	18.378	Peptidyl-prolyl cis-trans isomerase CYP18-4
AT5G07350	Q8VZG7	30.3542	30.4717	30.4784	30.3	30.1866	30.2015	29.8279	30.0482	29.9338	30.3043	30.1588	30.2159	29.8524	29.7318	30.0482	38	30	48.1	41.1	108.23
AT2G42740	P42795	29.4938	29.4756	29.4517	28.9949	28.9158	28.6344	29.5071	29.5927	29.6275	30.624	30.3839	30.2719	30.7292	30.7644	30.5441	10	10	54.9	54.9	20.831	60S ribosomal protein L11-1;60S ribosomal protein L11-2
AT1G01900	Q84WS0	30.3039	30.4561	30.4416	30.5433	30.2854	30.3212	30.4727	30.2241	30.2549	29.7043	29.4082	29.503	29.6735	29.5475	29.5902	21	21	40.3	40.3	83.246	Subtilisin-like protease SBT1.1
AT4G36130	Q42064	29.0593	28.9998	29.1179	28.8673	28.761	28.6659	29.8829	29.7153	29.6784	30.7183	30.6268	30.3914	30.6099	30.6221	30.724	13	4	53.5	21.3	27.948	60S ribosomal protein L8-3
AT5G58070	Q9FGT8	30.4777	30.5665	30.6404	30.5132	30.5866	30.7019	30.1115	30.1771	30.1923	29.5363	29.4092	29.4067	29.3219	29.3296	29.1642	12	12	75.8	75.8	21.434
AT1G43170	P17094	28.8374	29.1556	29.0415	28.8701	28.7609	28.896	30.1724	30.1621	30.0362	30.8105	30.5645	30.6779	30.1365	30.291	30.4027	16	16	37.3	37.3	44.559	60S ribosomal protein L3-1
ATMG01190	P92549	28.887	29.0582	29.1304	29.6094	29.1513	29.2723	29.4032	29.5072	29.6795	31.0482	30.4433	30.3393	30.7117	30.3852	30.3322	22	5	49.1	9.9	55.045	ATP synthase subunit alpha, mitochondrial
AT5G02240	Q94EG6	29.2752	29.3353	29.1545	29.4247	29.3168	29.0877	29.2759	29.1443	29.1058	29.7834	29.5815	29.67	31.3393	31.1818	31.0243	12	12	70.4	70.4	27.103	Uncharacterized protein At5g02240
AT3G04400	F4J3P1	28.9221	29.0618	29.0355	28.7297	28.7907	28.6194	29.7771	29.7785	29.7736	30.5926	30.491	30.3342	30.6528	30.7054	30.6576	12	12	81.6	81.6	13.406	60S ribosomal protein L23
AT3G02080	Q9SGA6	29.2783	29.4341	29.4291	28.9431	28.716	29.0675	29.3828	29.5225	29.4417	30.4717	30.3492	30.2785	30.8504	30.921	30.6879	11	4	60.1	23.8	15.828	40S ribosomal protein S19-1
AT1G22780	P34788	29.1801	29.307	29.1925	28.4775	28.7147	29.0426	29.6964	29.6293	29.7288	30.1571	30.2942	30.2816	30.5308	30.5735	30.3706	9	9	53.3	53.3	17.545	40S ribosomal protein S18
AT1G77120	P06525	30.5279	30.4719	30.391	30.4041	30.6656	30.1734	30.4032	30.2706	30.3208	29.2869	28.9581	29.3065	27.6609	28.09	28.0894	24	24	86.8	86.8	41.178	Alcohol dehydrogenase class-P
AT4G02520	P46422	29.7776	29.6177	29.8192	30.0798	29.731	29.966	30.1842	30.1414	30.2615	30.0371	29.8171	29.9231	29.7734	29.7441	30.0458	16	8	75.9	43.4	24.128	Glutathione S-transferase F2
AT3G62250	P59233	28.5104	27.6613	28.5928	28.6114	28.5077	28.5466	29.0711	28.7842	29.313	30.3362	30.4839	30.2857	31.0309	31.0024	30.7536	13	13	59.9	59.9	17.797	Ubiquitin-40S ribosomal protein S27a-3;Ubiquitin;40S ribosomal protein S27a-3;Ubiquitin-40S ribosomal protein S27a-2;Ubiquitin;40S ribosomal protein S27a-2;Ubiquitin-40S ribosomal protein S27a-1;Ubiquitin;40S ribosomal protein S27a-1;Ubiquitin-60S ribosomal protein L40-2;Ubiquitin;60S ribosomal protein L40-2;Ubiquitin-60S ribosomal protein L40-1;Ubiquitin;60S ribosomal protein L40-1;Ubiquitin-NED…
AT3G16400	Q9SDM9	25.2376	24.3354	22.7573	24.0532	23.1098	24.0358	24.4738	23.813	23.2632	29.6172	29.6237	29.7018	31.8754	31.9017	31.7554	30	9	77.4	26.8	51.669	Nitrile-specifier protein 1
AT3G06050	Q9M7T0	29.7687	29.918	29.9255	30.0424	29.9293	29.8502	29.7325	29.8262	29.71	29.7566	29.6193	29.6158	30.2931	30.3287	30.2016	12	12	64.2	64.2	21.445	Peroxiredoxin-2F, mitochondrial
AT5G52300	F4KG52	30.6618	30.7296	30.6742	30.6073	30.6971	31.1539	30.0864	30.4603	30.4025	28.0709	27.9436	27.9922	24.9266	24.1308	24.0812	18	18	48.1	48.1	65.841	Low-temperature-induced 65 kDa protein
AT4G18100	P49211	28.6574	28.7915	28.7438	28.6184	28.4293	28.3951	29.5389	29.5738	29.4373	30.4714	30.4035	30.2569	30.5998	30.5338	30.4789	8	5	45.1	32.3	15.503	60S ribosomal protein L32-1
AT2G18020	P46286	28.7653	28.9309	28.5959	28.6223	28.298	28.7172	29.6389	29.7569	29.4641	30.6836	30.6525	30.5671	30.1722	30.2152	30.5916	12	3	48.4	16.3	27.859	60S ribosomal protein L8-1
AT4G11010	O49203	28.5142	28.5362	28.7174	28.422	28.3042	28.1518	29.0084	29.1745	28.8711	30.336	30.2587	30.2404	31.2225	30.955	30.6613	12	12	51.7	51.7	25.734	Nucleoside diphosphate kinase III, chloroplastic/mitochondrial
AT4G13930	O23254	29.6436	29.7607	29.6519	29.562	29.5969	29.3565	29.6561	29.6603	29.8412	30.2433	30.1872	30.0678	29.6854	29.9855	30.0185	27	27	77.9	77.9	51.717	Serine hydroxymethyltransferase 4
AT4G17390	Q8VYF1	27.9062	28.1665	27.916	28.018	28.175	27.5806	29.4374	29.4663	29.2779	30.7937	30.6774	30.5581	30.4536	30.4762	30.5752	7	7	33.8	33.8	24.239	60S ribosomal protein L15-2;60S ribosomal protein L15-1
AT1G63770	F4I3R0	29.6063	29.6345	29.7158	29.4486	29.4248	29.6077	30.099	29.9067	29.9303	29.9753	30.1062	30.1047	29.4356	29.586	29.6599	33	33	52.3	52.3	110.81	Puromycin-sensitive aminopeptidase
AT4G26740	O81270	30.2792	30.1734	30.0449	30.5832	30.1458	30.3518	30.1483	30.4488	30.6074	29.9303	29.0179	29.1019	24.4089	24.3295	22.9337	10	9	68.2	63.3	28.038	Peroxygenase 1
AT3G15260	Q9LDA7	30.2019	30.2332	30.1148	30.1575	30.2392	29.9982	29.7942	29.829	29.8728	29.5405	29.3466	29.2961	29.2083	29.0644	29.1528	15	15	56.1	56.1	31.63	Probable protein phosphatase 2C 39
AT1G78380	Q9ZRW8	29.2553	29.2172	29.391	29.4591	29.4525	29.5782	29.5916	29.6327	29.7042	29.4998	29.4861	29.492	30.5293	30.4657	30.3487	14	14	63.5	63.5	25.65	Glutathione S-transferase U19
AT4G14880	P47998	29.3526	29.4625	29.3817	29.5078	29.6309	29.2082	29.2781	29.1377	29.0157	29.5529	29.6409	29.4478	30.6486	30.6444	30.3385	16	15	70.2	66.1	33.805	Cysteine synthase 1
AT2G19730	O82204	28.744	28.644	28.7876	28.5511	28.2662	28.6281	29.4073	29.18	29.5124	30.5537	30.196	30.2375	30.445	30.4181	30.3732	6	5	43.4	34.3	15.895	60S ribosomal protein L28-1
AT4G13850	A8MSB9	27.4076	28.092	28.2554	28.3575	28.0678	28.5108	29.7502	29.5961	29.5454	30.2012	30.0665	29.9012	30.5687	30.6413	30.6904	4	4	28.5	28.5	14.691	Glycine-rich RNA-binding protein 2, mitochondrial
AT3G47520	Q9SN86	29.2198	29.4021	29.4112	29.3971	29.3764	29.4261	29.2399	29.3468	29.2339	29.8474	29.651	29.8919	30.4688	30.3032	30.3514	18	16	67.2	64.3	42.405	Malate dehydrogenase, chloroplastic
AT2G17360	Q93VH9	29.1292	29.3245	29.3299	29.0448	28.8172	29.0493	29.9117	29.8673	29.8728	30.3098	30.1277	30.1142	29.4961	29.5707	29.6392	15	1	61.3	5	29.802	40S ribosomal protein S4-1;40S ribosomal protein S4-2;40S ribosomal protein S4
AT5G52640	P27323	30.16	30.3555	30.188	30.3892	30.3608	30.0972	29.9117	29.9643	29.8793	29.224	29.1259	28.9934	28.4199	28.2237	28.3935	34	26	55.3	40.6	80.635	Heat shock protein 90-1
ATCG00120	P56757	23.8507	22.7883	23.621	22.485	23.2591	24.3651	22.1457	23.3597	23.4462	28.0007	27.2431	27.3748	32.3401	31.4756	31.6952	20	19	49.9	48.5	55.328	ATP synthase subunit alpha, chloroplastic
AT5G12030	O81822	30.0491	29.8461	29.7831	30.0049	30.0903	29.9425	29.8339	29.7537	29.7059	29.6251	29.6979	29.4047	29.2491	29.1668	28.905	13	13	65.4	65.4	17.685	17.7 kDa class II heat shock protein
AT2G22780	O82399	28.9146	28.5181	28.5904	29.0332	28.8913	28.9922	29.5389	29.4762	29.5436	30.0405	30.3347	30.337	29.6934	29.9127	30.1079	16	15	74.3	70.9	37.465	Probable malate dehydrogenase, glyoxysomal
AT3G12490	Q8H0X6	29.7599	29.8293	29.7125	29.8221	29.7455	29.9237	29.6163	29.4348	29.6299	29.69	29.5289	29.5518	29.6898	29.7166	29.5769	16	16	78.6	78.6	22.477	Cysteine proteinase inhibitor 6
AT3G04840	Q9CAV0	29.139	29.0693	29.01	28.9777	28.8043	28.5223	29.7469	29.8089	29.6559	30.4804	30.3762	30.2953	29.5379	29.4477	29.7073	16	9	55.7	41.6	29.85	40S ribosomal protein S3a-1
AT5G16130	Q8LD03	28.9564	28.8264	28.9901	28.6056	28.5931	28.5747	29.3828	29.3509	29.3448	30.3196	30.206	30.2272	30.2834	30.1553	30.1477	16	13	67.4	57.9	22.06	40S ribosomal protein S7-3
AT2G33590	O22809	30.0927	30.2012	30.1339	30.0452	30.019	30.2469	29.7911	30.2271	29.9335	29.1946	28.9596	29.166	28.1867	28.8618	28.3916	20	13	70.1	52	35.875
AT5G28840	Q93VR3	28.9133	28.9417	29.0077	28.974	28.9099	28.7836	29.2376	29.3919	29.1629	30.0041	29.9966	29.9578	30.2795	30.3858	30.2889	23	23	55.7	55.7	42.758	GDP-mannose 3,5-epimerase
AT2G24200	P30184	29.6082	29.3806	29.7497	29.6446	29.4948	29.4057	29.5222	29.5584	29.598	29.8299	29.7563	29.6721	29.5866	29.5245	29.7758	27	22	64.2	51.3	54.509	Leucine aminopeptidase 1
AT4G16155	F4JLP5	30.2076	30.2341	30.2941	30.1371	30.0811	30.3139	29.8459	29.9997	29.8414	29.096	29.232	28.3912	28.1569	28.56	27.5539	15	7	37.9	20.3	60.144	Dihydrolipoyl dehydrogenase 2, chloroplastic
AT1G27400	Q93VI3	28.8033	28.5161	28.6389	28.4058	28.3242	28.5552	28.8712	28.9916	28.7967	30.2634	30.1894	30.098	30.3479	30.3152	30.4279	8	8	46	46	19.897	60S ribosomal protein L17-1;60S ribosomal protein L17-2
AT2G42790	Q9SJH7	29.0029	29.0083	29.0128	28.8236	28.8902	29.0724	29.4453	29.5016	29.3231	29.9747	29.877	29.9951	30.0254	29.9723	29.8468	17	12	54.2	42.2	56.175	Citrate synthase 3, peroxisomal
AT1G04820	Q0WV25	26.7193	27.1431	27.9047	25.601	27.1515	26.3367	29.0057	29.1067	29.0103	30.2894	30.4576	30.6168	30.1062	30.4677	30.6363	20	1	60.9	3.1	49.54	Tubulin alpha-4 chain;Tubulin alpha-2 chain			AT1G50010
AT5G15200	Q9LXG1	28.6945	28.8059	28.7627	28.3038	28.1738	28.4209	29.2007	29.191	29.0228	30.3165	30.1276	30.2232	30.1157	30.237	30.0364	15	15	55.6	55.6	23.036	40S ribosomal protein S9-1;40S ribosomal protein S9-2
AT3G10090	Q9SR73	28.4696	28.2128	28.6136	28.0069	28.1992	28.2068	28.7802	28.7005	28.6663	29.7915	29.7722	29.5512	30.9658	30.7768	30.6375	7	6	62.5	53.1	7.3705	40S ribosomal protein S28-1
AT1G70600	P49637	28.7941	29.025	28.652	28.6087	28.4011	28.2439	29.509	29.503	29.4905	30.1652	30.1252	30.0897	29.9164	30.0548	30.2016	9	1	48.6	12.3	16.455	60S ribosomal protein L27a-3
AT4G02930	Q9ZT91	28.1796	28.4284	28.223	28.1524	27.9002	28.5799	29.3367	29.4099	29.2855	30.1342	30.0842	30.0962	30.2408	30.2541	30.3143	24	23	63	63	49.409	Elongation factor Tu, mitochondrial
AT5G51210	Q43284	29.8594	30.0325	30.0061	30.0492	29.9342	30.1179	29.9814	30.5961	30.6881	29.3571	28.5498	28.9246	23.5063	23.0647	23.0679	1	1	9.9	9.9	14.852	Oleosin 14.9 kDa
AT3G55280	A8MS83	26.6398	27.8971	27.9613	27.9417	27.7556	26.7863	28.6285	28.6123	28.5939	30.0381	30.0229	29.852	31.2964	30.7229	30.5293	11	11	44.6	44.6	16.744	60S ribosomal protein L23a-2;60S ribosomal protein L23a-1
AT5G62690	Q9ASR0	27.6541	27.4701	27.7338	27.3521	27.994	27.2472	29.3088	29.4231	29.2248	30.5539	30.577	30.5465	29.6101	29.8717	30.0968	25	5	68.9	17.8	50.733	Tubulin beta-3 chain;Tubulin beta-2 chain			AT5G62700
AT3G02230	Q9SRT9	29.279	29.246	29.1849	29.623	29.7727	29.5095	29.6233	29.5915	29.6509	29.8111	29.8899	29.7761	29.0763	29.3249	29.4343	19	8	74.2	33.9	40.629	UDP-arabinopyranose mutase 1
AT5G57550	Q38907	31.318	30.8856	31.3041	30.5266	30.439	30.4031	28.3282	28.146	28.284	25.6288	25.6153	25.9923	23.633	25.2546	22.7434	8	8	35.2	35.2	32.572	Probable xyloglucan endotransglucosylase/hydrolase protein 25
AT4G01850	P17562	22.8203	25.1496	23.2148	23.48	23.1284	23.7125	25.1565	26.2453	26.3524	30.6095	29.9779	30.3878	31.0011	30.7968	31.1323	17	6	71	30	43.255	S-adenosylmethionine synthase 2
AT4G15530	O23404	28.5099	28.5968	28.7489	28.897	28.6729	28.6995	29.5259	29.5023	29.525	30.3023	30.3311	30.3269	28.9638	29.2806	29.423	32	32	57.6	57.6	93.379	Pyruvate, phosphate dikinase 1, chloroplastic
AT3G23990	P29197	27.5445	28.0056	28.1786	28.3089	28.1408	28.1374	29.3367	29.5267	29.3891	30.1096	30.1735	30.2311	29.9716	30.0321	29.9929	28	17	53.9	38.8	61.28	Chaperonin CPN60, mitochondrial
AT5G08280	Q43316	24.1995	23.4691	23.2373	24.9073	23.2781	22.9964	23.9406	23.035	24.09	28.6872	28.9283	28.6017	31.5973	31.3515	31.6525	21	21	58.6	58.6	41.043	Porphobilinogen deaminase, chloroplastic
AT2G18540	F4IQK5	29.8926	29.9727	29.9471	29.7915	29.6841	29.9046	29.6075	29.7152	29.7981	29.3055	29.0118	29.1402	28.16	28.3308	28.5044	14	14	21.5	21.5	84.768
AT4G11600	O48646	29.4831	29.6267	29.5499	29.6301	29.5397	29.5006	29.6198	29.4226	29.3645	29.3144	29.2212	29.1967	29.4906	29.5292	29.2533	15	15	58.6	58.6	25.584	Probable phospholipid hydroperoxide glutathione peroxidase 6, mitochondrial
AT1G42970	P25857	28.984	29.0239	28.9237	29.0542	29.0785	28.9461	28.7581	28.412	28.7757	28.9493	28.9803	28.8549	30.6584	30.6423	30.5048	18	17	47.4	44.1	47.659	Glyceraldehyde-3-phosphate dehydrogenase GAPB, chloroplastic
AT5G57655	Q9FKK7	29.5172	29.629	29.6423	29.6021	29.6249	29.7	29.7047	29.7875	29.7089	29.4513	29.3677	29.2105	28.734	28.7817	28.6952	17	17	52	52	53.719	Xylose isomerase
AT1G30580	Q9SA73	29.0657	29.2674	29.2433	29.0482	29.1058	28.9266	29.3452	29.4574	29.1978	29.7835	29.7986	29.7805	29.3801	29.4831	29.6475	21	21	78.4	78.4	44.471	Obg-like ATPase 1
AT2G01140	Q9ZU52	29.7736	29.7889	29.6812	29.6763	29.6178	29.4953	28.9923	29.2927	29.1775	29.226	29.1724	29.2286	29.4689	29.6575	29.4038	16	14	48.8	44.5	42.327	Probable fructose-bisphosphate aldolase 3, chloroplastic
AT3G62030	F4IX28	28.0294	28.2149	28.435	28.218	28.3207	28.2973	28.3109	28.4403	28.258	29.5225	29.5276	29.3675	30.605	30.5194	30.4403	8	8	35.5	35.5	28.079	Peptidyl-prolyl cis-trans isomerase;Peptidyl-prolyl cis-trans isomerase CYP20-3, chloroplastic
AT2G05220	Q9SJ36	28.4533	28.5655	28.7423	28.0479	28.0227	28.3205	28.7389	28.7738	28.7492	29.9043	29.7792	29.7638	30.3985	30.2947	30.0557	12	1	62.9	30.7	15.951	40S ribosomal protein S17-2
AT3G53740	Q9M352	26.5573	26.9527	26.8945	26.269	26.6081	26.3093	28.1937	28.3129	27.0753	30.1136	30.1214	29.7149	31.0148	30.7682	30.4946	7	2	40.8	14.6	11.68	60S ribosomal protein L36-2
AT5G04430	Q9LZ82	28.7202	28.828	28.8302	28.9228	28.6991	28.6697	28.5969	28.7494	28.8225	29.5003	29.3811	29.5356	30.4032	30.2077	30.1055	15	15	55.3	55.3	33.82	Protein BTR1
AT3G01280	Q9SRH5	28.7735	28.6788	28.8383	29.0205	28.2004	28.8007	28.3828	28.5726	28.8063	30.1546	29.556	29.3614	30.2853	29.5583	29.4419	14	12	61.6	56.9	29.425	Mitochondrial outer membrane protein porin 1
AT4G36195	Q683F9	29.8061	29.8571	29.845	29.7749	29.9485	29.6548	29.6544	29.5969	29.6933	28.9288	28.8329	28.817	28.1319	28.1926	28.2995	17	16	50.5	46.8	53.711
AT4G38680	Q41188	29.2361	28.9147	29.0477	29.1006	28.9301	28.942	28.9869	28.8414	29.0645	29.6075	29.5618	29.4879	29.6431	29.3994	29.8272	5	4	34	34	19.153	Cold shock protein 2
AT1G79920	F4HQD5	29.0357	29.1737	29.1763	29.0703	29.2579	29.1807	29.099	29.3871	29.2969	29.6614	29.474	29.5127	29.1649	29.3386	29.4186	26	3	45.8	9.4	91.679	Heat shock 70 kDa protein 15
AT4G34200	O49485	28.7319	28.6836	28.7836	28.7463	28.6728	28.606	28.8504	28.879	28.8477	29.5789	29.6412	29.6358	29.7931	29.724	30.0898	22	20	55.7	52.4	63.324	D-3-phosphoglycerate dehydrogenase 1, chloroplastic
AT1G60680	Q84M96	29.7593	29.6351	29.7801	29.5894	29.8524	29.472	29.4073	29.5358	29.4954	29.0118	28.8704	28.7577	28.7257	28.7679	28.6422	14	8	65	42.2	38.268	Probable aldo-keto reductase 2
AT1G70730	F4I6W4	29.5339	29.4714	29.4317	29.4754	29.3846	29.4047	29.2262	29.3523	29.4649	29.18	29.0369	29.1106	29.1662	29.0599	29.2311	24	16	52.7	38.4	72.557	Probable phosphoglucomutase, cytoplasmic 2
AT5G19550	P46645	28.9526	29.0039	28.9521	28.9456	29.057	28.7597	29.3473	29.2892	29.1978	29.7646	29.7975	29.6259	29.224	29.471	29.2907	21	19	75.6	70.6	44.266	Aspartate aminotransferase, cytoplasmic isozyme 1
AT1G77510	Q9SRG3	29.3942	29.2472	29.4259	29.4993	29.4421	29.4947	29.1263	29.1912	29.1388	29.2238	29.1322	29.2805	29.463	29.3149	29.2458	25	21	54.7	52.6	56.364	Protein disulfide isomerase-like 1-2
AT1G18540	Q9FZ76	26.9446	27.8718	27.3919	27.1127	27.6596	26.5373	28.6865	28.3266	28.3848	29.9392	29.5552	30.0682	30.6465	30.3788	30.3629	12	6	48.9	27	26.152	60S ribosomal protein L6-1
AT3G30330	A0A178VJ19	23.6535	24.5206	24.128	23.7369	23.9299	24.1568	24.48	24.4379	22.873	28.8603	29.0539	28.8229	31.5266	31.3623	30.861	8	8	45.5	45.5	20.075	50S ribosomal protein L12-3, chloroplastic;50S ribosomal protein L12-1, chloroplastic
AT5G02960	P49201	28.2099	28.4285	27.9878	28.1307	28.0556	27.9541	28.9146	29.2584	28.6242	30.1505	30.1795	30.1541	29.363	29.7282	29.7059	9	9	50	50	15.735	40S ribosomal protein S23-2;40S ribosomal protein S23-1
AT2G39730	P10896	24.1844	23.1844	24.6454	23.5869	24.0856	23.3619	23.3874	26.074	25.0349	28.4412	28.7616	28.4503	31.414	31.4298	30.592	25	25	62.9	62.9	51.981	Ribulose bisphosphate carboxylase/oxygenase activase, chloroplastic
AT4G01900	Q9ZST4	29.0782	29.437	29.3028	29.1409	28.914	29.2753	29.158	29.1347	28.9946	29.2245	29.2155	29.152	29.7183	29.8195	29.4492	8	8	40.3	40.3	21.275	Nitrogen regulatory protein P-II homolog
AT2G37220	Q9ZUU4	23.8706	25.2547	25.0515	23.2894	26.6056	25.5604	26.2891	26.1258	26.0184	29.2601	29.5718	29.5899	30.9393	31.1132	30.9332	13	11	59.9	56.7	30.718	RNA-binding protein CP29B, chloroplastic
AT3G48990	Q9SMT7	29.3926	29.3251	29.5342	29.5014	29.491	29.3869	29.3196	29.3597	29.3171	29.4695	29.3646	29.3504	28.4403	28.7921	29.0217	16	16	40.1	40.1	55.544	Oxalate--CoA ligase
AT3G14415	Q9LRS0	22.5212	24.4886	22.6761	23.8741	23.6294	24.4972	27.2714	26.8169	26.9258	29.3724	29.377	29.3343	31.0152	31.1578	30.7737	22	9	67.8	21.8	40.306	Peroxisomal (S)-2-hydroxy-acid oxidase GLO2
AT1G15930	Q9S9P1	28.3398	28.7396	28.1908	28.2359	28.2933	28.061	29.1361	28.8956	29.0405	29.9338	29.6397	29.6477	29.8265	29.5704	30.1252	8	6	68.1	55.6	15.377	40S ribosomal protein S12-1
AT1G78300	Q01525	28.6062	28.7037	28.6989	28.639	28.6237	28.7818	28.8741	28.6798	28.7825	29.4718	29.2484	29.4413	30.124	30.016	29.907	16	8	85.3	52.1	29.161	14-3-3-like protein GF14 omega
AT3G10920	O81235	28.5176	28.7913	28.8936	28.8803	28.7311	28.8018	28.9539	28.7144	28.875	29.2282	29.2836	29.1549	30.0661	30.0245	29.9973	12	12	78.8	78.8	25.444	Superoxide dismutase [Mn] 1, mitochondrial;Superoxide dismutase
AT2G38230	O80448	23.8024	23.8865	24.4822	25.4026	26.2904	23.8594	28.1065	28.1104	28.2486	30.1303	30.0721	30.1354	30.3916	30.4854	30.4035	16	11	72.5	56	32.862	Pyridoxal 5-phosphate synthase subunit PDX1.1
AT4G18480	P16127	25.1399	23.1623	23.6997	24.0866	24.1653	24.6569	25.0062	24.5219	24.0616	28.6202	28.3406	28.5602	31.4208	31.2513	31.1934	21	11	59.2	26.7	46.269	Magnesium-chelatase subunit ChlI-1, chloroplastic
AT5G26000	P37702	29.4957	29.4868	29.429	29.2626	29.4196	29.1058	28.8623	28.9902	28.9397	28.6291	28.6895	28.7168	29.8626	29.8321	29.5263	16	16	41.9	41.9	51.481	Myrosinase 1
AT2G43520	O22866	29.6108	29.4288	29.4113	29.3514	29.6317	29.1966	29.8843	29.7158	29.5601	29.2389	29.0621	29.0059	27.7494	27.6807	28.277	4	4	50	50	9.6604	Defensin-like protein 193
AT2G04030	Q9SIF2	24.6072	23.7028	26.2937	26.0339	26.6281	26.9514	28.6663	28.7205	28.399	30.0965	30.2518	30.3374	29.8933	29.9133	30.2188	32	27	59.1	53.3	88.662
AT2G21060	Q38896	28.4618	28.6695	28.5645	28.5703	28.6276	28.466	28.6798	28.6905	28.6453	29.3914	29.4458	29.3368	30.0791	30.0707	29.9636	7	6	57.2	57.2	19.077	Cold shock domain-containing protein 4
AT1G16470	O23708	28.7421	28.7665	28.8331	28.4789	28.9498	28.9258	28.7613	28.8214	28.6404	29.0842	29.1748	28.9838	30.1735	29.983	29.8533	10	1	55.3	8.5	25.701	Proteasome subunit alpha type-2-A
AT2G41840	P49688	28.1948	28.7111	28.3357	28.267	27.5439	28.1138	29.0322	28.7245	28.9	29.8115	29.5385	29.6358	29.8904	29.7806	29.7921	9	4	33.7	18.6	30.878	40S ribosomal protein S2-3
AT5G10160	Q9LX13	29.4606	29.5935	29.4742	29.395	29.432	29.5436	29.3174	29.4626	29.2673	28.8457	28.7413	28.5778	28.9171	29.1792	28.731	10	8	39.7	33.3	24.123
AT3G51260	P30186	28.8103	29.0086	28.8945	28.7414	28.7184	28.8733	28.8653	28.8487	29.0202	29.3741	29.3304	29.2359	29.7608	29.5972	29.6414	15	5	67.2	28.8	27.337	Proteasome subunit alpha type-7-A
AT5G61780	Q9FLT0	29.0423	29.1261	29.1356	29.0959	29.1438	28.968	28.8142	28.8577	28.8681	29.5076	29.3866	29.3282	28.8249	29.1557	29.3001	34	26	47.1	40	107.74
AT1G56340	F4I529	28.6578	28.8612	28.7384	28.7928	28.7729	28.7884	28.5463	28.576	28.5104	29.3812	29.3207	29.2899	29.8194	29.6629	29.4161	17	12	41.3	33.3	49.142	Calreticulin-1
AT4G13010	Q9SV68	29.818	29.7557	29.8422	29.8266	29.7481	29.6357	29.1628	29.0639	29.0919	28.5468	28.3778	28.4344	27.6779	27.9616	27.9115	12	12	58.7	58.7	34.436	Putative quinone-oxidoreductase homolog, chloroplastic
AT1G26630	Q93VP3	28.4882	28.2106	28.7799	27.8875	29.1021	28.582	29.0914	29.0059	28.8428	29.2896	28.9667	29.0105	29.5333	29.7449	29.7893	8	6	86.2	69.2	17.14	Eukaryotic translation initiation factor 5A-2
AT1G68560	Q9S7Y7	29.0398	29.122	28.8342	29.1824	29.4383	28.9325	29.766	29.501	29.6898	29.2667	28.9819	28.986	28.3733	28.5218	28.5275	21	21	36.9	36.9	102.4	Alpha-xylosidase 1
AT5G13980	Q8LPJ3	29.2595	29.2008	29.1348	29.3475	29.3328	29.3226	29.1065	29.2947	29.1053	28.9856	28.9116	28.9027	29.205	28.8262	28.88	25	25	33.9	33.9	115.9	Alpha-mannosidase
AT4G09000	F4JJ94	27.9879	28.3535	28.3928	28.1659	28.46	28.4348	28.7739	28.8257	28.6379	29.4319	29.3514	29.4218	30.0486	29.8299	29.8984	15	6	58.2	27.7	35.838	14-3-3-like protein GF14 chi
AT3G04920	A0A1I9LMY7	28.0962	28.2869	27.9944	27.9288	27.9304	27.7079	28.6146	28.7532	28.5966	29.5307	29.3785	29.2162	30.0496	30.0009	29.7878	6	4	37.5	26.8	12.909	40S ribosomal protein S24-1
AT5G59880	F4JXD5	28.5033	28.4303	28.5136	28.4942	28.5836	28.4621	28.5609	28.7477	28.5938	29.2691	29.1305	29.1236	29.744	29.7256	29.6966	6	4	54	41.1	14.124	Actin-depolymerizing factor 3
AT3G17820	Q9LVI8	28.75	29.0202	28.8731	28.6647	29.0019	28.1774	28.8294	29.0513	28.7272	29.4663	29.2885	29.1728	29.5451	29.5253	29.3765	16	13	68.4	59.9	38.594	Glutamine synthetase cytosolic isozyme 1-3
AT1G62710	Q39044	29.8346	29.9154	29.8656	29.7248	29.8916	29.4209	29.2077	29.0381	29.199	28.3507	28.0807	28.1006	27.2319	27.3918	27.2495	6	6	18.5	18.5	53.827	Vacuolar-processing enzyme beta-isozyme
AT3G49910	P51414	27.7438	27.4452	27.8395	27.3352	26.7193	27.2544	28.4591	28.386	28.2972	29.4938	29.5372	29.3993	30.2744	30.0778	29.9739	6	6	34.2	34.2	16.944	60S ribosomal protein L26-1
AT1G28290	Q9FZA2	29.1727	29.2565	29.2137	29.2557	29.1797	29.1216	29.3766	29.3502	29.3781	29.1523	29.0089	28.9979	28.5755	28.441	28.7301	4	4	19.4	19.4	33.932	Non-classical arabinogalactan protein 31
AT1G07770	P42798	28.6817	29.0183	28.9045	28.3215	27.9277	28.406	29.2399	28.9363	29.077	29.7671	29.5158	29.5871	28.9708	29.2248	29.1706	7	3	56.9	23.8	14.804	40S ribosomal protein S15a-1
AT4G10480	A8MQP6	22.7373	23.3518	23.644	23.412	23.7579	23.1718	26.9089	26.8807	26.9672	29.3896	29.467	29.3545	30.6882	30.3664	30.4033	10	9	62.1	62.1	23.114	Nascent polypeptide-associated complex subunit alpha-like protein 4
AT3G53460	Q43349	23.9247	22.5863	22.98	23.6268	23.706	23.4316	25.2714	26.2063	23.8114	28.5323	29.6022	29.8364	30.4241	30.9434	30.844	12	10	49.1	46.4	35.243	29 kDa ribonucleoprotein, chloroplastic
AT2G22170	Q9SIE7	28.869	28.8335	28.6875	28.8133	28.6251	28.3803	28.7292	28.5759	28.5916	29.1969	29.0456	28.9316	29.7143	29.8331	29.6902	6	5	40.4	35	20.129
AT3G12390	Q9LHG9	28.267	28.2049	28.4592	28.5761	28.4261	28.4345	28.4938	28.5187	28.5852	29.3004	29.0773	29.0584	29.6328	29.9781	29.9549	9	5	65	46.3	21.982	Nascent polypeptide-associated complex subunit alpha-like protein 1
AT3G05590	P42791	28.3067	28.2682	28.3871	28.111	28.0603	27.7609	28.9316	29.1225	28.8744	29.7241	29.5993	29.6088	29.2358	29.3357	29.4534	10	2	46.5	15.5	20.925	60S ribosomal protein L18-2
AT5G65020	Q9XEE2	24.3362	25.0456	25.1077	25.318	23.7749	23.9569	24.4862	25.5347	24.7204	28.3026	28.517	28.4555	31.0338	31.1583	30.8941	18	18	55.5	55.5	36.266	Annexin D2;Annexin
AT3G58610	Q05758	27.0279	27.2261	25.5017	27.5657	27.3862	27.5165	28.9567	28.9537	28.7522	29.8489	29.8935	29.7233	29.5485	29.6075	29.6577	23	23	59.6	59.6	63.812	Ketol-acid reductoisomerase, chloroplastic
AT1G78900	O23654	27.1811	26.897	27.3483	28.4926	28.6564	28.5483	28.8973	29.1868	28.8749	29.5145	29.3906	29.2681	29.2007	29.3429	29.671	27	26	57.6	56.7	68.812	V-type proton ATPase catalytic subunit A
AT1G09780	O04499	26.4029	26.4072	26.7779	27.4523	27.6012	27.5846	27.6663	28.0496	27.8236	29.5646	29.2863	29.3665	30.2756	30.388	30.2677	24	14	58.2	40.6	60.579	2,3-bisphosphoglycerate-independent phosphoglycerate mutase 1
AT5G18170	Q43314	29.2801	29.2479	29.3826	29.4749	29.3093	29.3278	29.2759	29.2415	29.352	28.7859	28.8088	28.6753	27.7372	27.8404	28.0665	12	5	42.8	19.7	44.524	Glutamate dehydrogenase 1
AT3G26650	P25856	28.89	28.7673	28.7815	28.8541	28.8874	28.764	28.5389	28.6224	28.4472	28.6425	28.5754	28.4262	29.8959	29.8468	29.8124	15	5	50.8	28.5	42.489	Glyceraldehyde-3-phosphate dehydrogenase GAPA1, chloroplastic
AT5G16970	Q39172	29.3268	29.3529	29.3729	29.5758	29.3122	29.6742	29.196	29.171	29.2259	28.4637	28.5375	28.475	27.7806	28.204	27.8154	15	9	75.4	43.5	38.133	NADP-dependent alkenal double bond reductase P1
AT2G21170	Q9SKP6	28.3044	28.5089	28.3568	28.1502	28.3995	28.1816	27.8081	27.7762	28.1534	28.6712	28.8879	29.0331	30.0114	30.1696	30.1198	12	11	40.3	37.8	33.345	Triosephosphate isomerase, chloroplastic;Triosephosphate isomerase
AT5G67360	O65351	28.4441	28.8087	28.7681	28.3198	28.5329	28.3959	28.94	28.9134	28.7695	29.2508	29.1102	29.0452	29.3769	29.317	29.317	13	13	34.7	34.7	79.414	Subtilisin-like protease SBT1.7
AT1G78370	Q8L7C9	29.0805	29.3313	29.1311	29.1044	29.2748	29.0166	28.7833	28.8644	29.0079	28.7116	28.7353	28.7161	28.9289	28.8842	28.616	10	10	60.8	60.8	25.006	Glutathione S-transferase U20
AT1G09210	Q38858	28.2988	28.3483	28.3037	27.6132	28.333	28.4224	28.141	28.1686	28.2126	29.3243	29.2975	29.3195	29.8442	29.7765	29.5843	19	14	44.1	36.1	48.156	Calreticulin-2
AT1G52690	Q96270	29.432	29.4556	29.5747	29.5484	29.4472	30.0152	29.4957	29.044	29.6022	28.1486	27.5995	28.2883	26.8565	26.9484	27.0444	8	8	60.9	60.9	18.1
AT3G60770	P59223	28.3516	28.5513	28.3071	28.0228	27.7327	27.957	28.8945	28.79	28.6212	29.6008	29.6044	29.5576	29.3653	29.332	29.2133	11	11	58.3	58.3	17.095	40S ribosomal protein S13-1;40S ribosomal protein S13-2
AT5G63030	Q8L8T2	29.4003	29.3317	29.2184	29.3921	29.3297	29.3898	29.1386	29.3093	29.1994	28.6655	28.5664	28.7494	27.9635	28.1319	27.9669	5	5	60.8	60.8	13.61	Glutaredoxin-C1
AT3G48730	Q42522	23.0928	24.355	23.1415	24.1541	25.2274	25.2288	24.3376	22.9606	23.9909	28.1331	28.3742	28.3323	31.1859	31.1355	30.4531	21	11	62.1	32	50.141	Glutamate-1-semialdehyde 2,1-aminomutase 2, chloroplastic
AT1G76030	P11574	28.3693	28.2207	28.3362	28.6835	28.6763	28.775	28.4668	28.6116	28.661	29.2183	29.115	28.9175	29.5133	29.5048	29.6576	27	7	71	15.2	54.107	V-type proton ATPase subunit B1;V-type proton ATPase subunit B3
AT2G37660	O80934	27.9171	28.0441	28.1516	28.242	27.9319	27.8391	27.5826	26.3951	27.3811	29.0075	28.8627	28.7411	30.4653	30.3452	30.0512	9	9	36	36	34.879	Uncharacterized protein At2g37660, chloroplastic
AT4G34110	P42731	27.1118	27.734	28.1247	26.8132	27.0358	27.6166	28.0762	28.4295	28.2868	29.3659	29.3911	29.3356	30.0189	30.0001	29.8795	20	18	45	39.7	68.672	Polyadenylate-binding protein 2
AT1G66240	Q94BT9	27.8651	28.3865	28.1864	28.2269	28.183	28.1823	28.3992	28.3867	28.2872	29.0801	29.0067	28.8204	30.0331	29.7805	29.6695	7	2	80.3	18.4	8.1584	Copper transport protein ATX1
AT1G74060	Q9C9C6	28.0037	28.0414	28.3341	27.6391	27.4543	27.7967	28.7895	28.7206	28.7303	29.295	29.2412	29.1329	29.7672	29.7536	29.4503	9	3	36.9	15	26.008	60S ribosomal protein L6-2;60S ribosomal protein L6-3
AT1G02780	Q9SRX2	27.6587	27.7755	27.7286	27.6212	27.5689	27.4351	29.0137	28.767	28.7868	29.6315	29.4353	29.512	28.8992	28.9699	29.1409	9	6	31.8	26.2	24.606	60S ribosomal protein L19-1
AT4G35830	Q42560	29.1793	29.1546	29.1416	29.0984	29.043	29.213	29.5481	29.4806	29.5622	28.7002	28.4605	28.6736	27.2218	26.9625	27.5232	29	21	47.3	35.4	98.151	Aconitate hydratase 1;Aconitate hydratase
AT3G44100	Q9LXQ2	29.0178	29.255	29.2883	29.2499	29.0959	29.1249	29.1532	28.992	29.1139	28.5096	28.3236	28.3333	28.2082	28.5127	28.5117	4	4	25.7	25.7	16.07
AT1G06680	Q42029	24.3387	24.1035	24.2803	23.1457	23.4611	22.9519	22.8298	22.8811	22.3116	27.2469	27.9652	27.6586	31.1809	31.0374	30.7502	11	11	46.6	46.6	23.759	Oxygen-evolving enhancer protein 2-1, chloroplastic
AT3G50980	P25863	29.2169	29.2574	29.3479	29.1717	29.0474	29.3907	28.8564	28.9873	29.0534	28.4491	28.2534	28.4725	28.541	28.1141	28.3418	2	2	16.4	16.4	13.435	Dehydrin Xero 1
AT3G08590	Q9M9K1	28.2666	28.2781	28.3325	28.3787	28.3917	28.1229	28.3239	28.1542	28.1628	29.0661	29.0965	28.9208	29.5079	29.582	29.5003	23	13	59.3	41.6	60.763	Probable 2,3-bisphosphoglycerate-independent phosphoglycerate mutase 2
AT5G27700	Q3E902	26.84	27.3976	27.3593	27.1779	27.1938	27.5555	27.0813	27.5435	27.2551	29.2878	29.2618	29.2646	30.0264	30.0005	29.8475	5	2	78	19.5	9.1131	40S ribosomal protein S21-2
AT5G55730	Q9FM65	29.3029	29.4265	29.4607	29.4297	29.5495	29.7311	28.8887	29.0521	28.9208	27.7029	27.8017	27.9634	27.2083	27.0134	27.178	11	11	36.8	36.8	44.849	Fasciclin-like arabinogalactan protein 1
AT2G31610	Q9SIP7	28.377	28.5573	28.5502	27.6887	27.7238	28.1275	28.7989	28.477	28.6337	29.3217	29.1106	29.1188	29.0506	29.0925	29.1135	11	1	46.8	5.2	27.519	40S ribosomal protein S3-1
AT4G16210	Q6NL24	28.3745	28.3502	28.3304	28.2259	28.2931	28.0771	28.6898	28.7785	28.5098	29.0114	28.9248	28.9912	29.3553	29.3244	29.236	18	18	67.9	67.9	28.818
AT3G53020	P38666	27.9122	28.0039	28.3115	27.8602	27.7688	27.7404	28.965	28.7632	28.7695	29.4316	29.404	29.2776	29.058	29.049	29.043	4	4	20.2	20.2	18.632	60S ribosomal protein L24-2;60S ribosomal protein L24-1
AT3G15730	Q38882	28.3888	28.4459	28.5305	28.1706	28.3547	28.13	28.6216	28.7279	28.5692	29.1559	29.1916	29.2742	28.7544	28.7585	29.0246	22	18	51.4	46	91.847	Phospholipase D alpha 1
AT1G53850	O81149	28.6754	28.8446	28.5725	28.1686	29.0176	28.6798	28.6492	28.1999	28.7716	28.2322	28.357	28.6799	29.0904	29.103	29.046	15	4	70.9	23.2	25.947	Proteasome subunit alpha type-5-A
AT5G27770	Q9FE58	27.5951	27.7521	27.9404	27.1434	27.3926	27.3819	28.0762	28.2264	27.9637	28.8858	28.9155	28.8486	30.313	30.0097	29.5463	10	2	68.5	20.2	14.047	60S ribosomal protein L22-3
AT3G52150	Q8VYM4	23.6174	24.7431	25.4787	23.223	23.6548	23.5177	25.654	24.3687	23.9289	27.939	28.0086	28.3462	30.6777	31.2157	30.1996	10	10	43.9	43.9	27.748
AT5G09640	Q8VZU3	29.3901	29.3942	29.7936	29.3451	29.2539	29.247	28.9732	29.2321	29.3415	27.8583	27.9662	27.835	26.2805	23.3072	26.8229	13	13	41.1	41.1	52.578	Serine carboxypeptidase-like 19;Serine carboxypeptidase-like 19 chain A;Serine carboxypeptidase-like 19 chain B
AT1G08830	P24704	27.2133	27.1981	27.2898	27.1501	28.7097	22.9315	27.4629	28.0236	27.3995	27.7846	28.1008	28.1066	30.4591	30.1579	30.1816	4	3	48.7	48.7	15.098	Superoxide dismutase [Cu-Zn] 1
AT1G48470	Q8GXW5	29.1792	29.2876	29.2355	29.0936	29.1957	29.0291	28.8945	28.8509	29.0119	28.2919	28.2957	28.2667	27.9669	27.9256	27.8355	17	15	58.9	52.1	38.907	Glutamine synthetase cytosolic isozyme 1-5
AT2G37270	Q9ZUT9	28.6395	28.4876	28.1654	28.1509	27.8908	27.5623	28.5934	28.4983	28.5469	29.1438	28.8803	28.9656	28.0504	28.1063	28.8193	7	3	44	15.9	22.99	40S ribosomal protein S5-1
AT2G47730	Q96266	23.7995	24.3032	23.8989	22.513	23.138	25.1363	23.3559	23.05	25.4095	29.0363	28.9612	28.7885	30.6691	30.4481	30.3724	13	12	75.8	72.1	24.076	Glutathione S-transferase F8, chloroplastic
AT1G24360	P33207	29.1091	29.2153	29.1603	29.0212	29.1008	28.947	28.9031	28.6967	28.9027	28.2116	27.936	28.4775	27.8647	27.5487	27.8622	12	12	43.3	43.3	33.548	3-oxoacyl-[acyl-carrier-protein] reductase, chloroplastic
AT2G05920	Q9ZUF6	28.7132	29.0406	28.9187	29.011	28.8152	28.918	28.5315	28.4682	28.5268	28.3958	28.3266	28.5966	28.9376	28.9363	28.9302	15	15	33.8	33.8	80.014
AT4G25130	P54150	28.4766	28.5977	28.6345	28.4685	28.9387	29.0691	28.2445	28.2635	28.4727	28.4599	27.9612	28.2277	29.221	29.2527	29.2294	8	8	38	38	28.644	Peptide methionine sulfoxide reductase A4, chloroplastic
AT5G11520	P46644	27.0984	27.1687	27.091	27.4441	26.1067	27.1779	28.2625	28.7554	28.4889	29.5215	29.7006	29.5971	28.9042	28.8609	29.0589	21	18	51.4	47	48.954	Aspartate aminotransferase 3, chloroplastic
AT3G60245	Q8RXU5	26.6013	27.3109	26.5872	26.5773	26.509	26.035	27.0401	27.311	27.0276	28.004	29.0999	28.044	30.4083	30.3907	29.9362	4	4	40.2	40.2	10.241	60S ribosomal protein L37a-2;Putative 60S ribosomal protein L37a-1
AT4G31300	Q8LD27	27.9041	28.1668	27.8943	27.8643	27.7283	26.8908	27.7064	27.7362	27.762	28.8152	28.5813	28.6965	30.0504	29.8379	29.7452	10	10	73	73	25.151	Proteasome subunit beta type-6;Proteasome subunit beta type
AT5G40370	Q9FNE2	28.338	28.1672	28.5319	28.2939	28.3774	28.0108	28.2979	28.5878	28.4024	28.9362	28.7862	28.6528	29.2686	29.1559	29.1083	7	7	82.9	82.9	11.756	Glutaredoxin-C2
AT5G60640	Q9FF55	28.4115	28.3195	28.2371	28.4969	28.2611	28.4383	27.8916	28.3565	28.4472	28.9695	28.7198	28.718	29.0979	29.1773	28.9811	13	13	30.2	30.2	66.356	Protein disulfide isomerase-like 1-4;Protein disulfide-isomerase
AT5G20950	Q8W112	28.1673	28.165	28.435	28.3976	28.5479	28.3495	28.6216	28.4558	28.6185	28.7645	28.713	28.631	28.9049	29.0281	29.0254	14	14	29.8	29.8	67.926
AT3G25230	B3H746	25.741	25.8579	26.4112	25.7614	26.9636	26.7214	27.5315	27.6805	27.8887	28.3268	28.7252	29.626	30.2313	29.9898	29.7297	19	19	44	44	62.911	Peptidyl-prolyl cis-trans isomerase FKBP62
AT1G09640	O04487	28.533	28.759	28.7618	28.4873	28.4463	28.5433	28.8415	28.8588	28.6895	28.9302	28.8968	28.8249	27.8994	27.9463	28.091	17	9	49	23.4	46.66	Probable elongation factor 1-gamma 1
AT1G14980	P34893	26.3291	26.3548	26.3158	26.1864	26.5575	26.2506	27.5014	27.503	27.0347	29.0279	29.0261	28.781	30.6534	29.8434	29.5575	8	8	78.6	78.6	10.812	10 kDa chaperonin
AT3G63490	Q9LY66	24.3296	24.2017	22.3696	22.1523	23.7919	21.9672	24.002	24.0566	22.8603	27.3203	27.2194	27.0791	31.025	30.8663	30.2825	11	11	42.5	42.5	37.632	50S ribosomal protein L1, chloroplastic
AT5G13420	Q9LYR4	28.8735	28.8747	28.939	28.8584	29.0024	28.9787	28.8653	28.7979	28.699	28.5063	28.3232	28.4364	27.7486	27.7156	27.7641	16	16	45.9	45.9	47.698
AT4G15000	A8MS28	27.4995	27.7496	27.5984	27.2484	27.1243	27.0576	28.2803	28.4412	28.3065	29.4363	29.2643	29.08	29.3847	29.221	29.2189	4	4	38.2	38.2	15.035	60S ribosomal protein L27-3;60S ribosomal protein L27-2
AT2G20420	O82662	27.8162	27.8615	28.0878	28.1888	28.1798	28.1877	28.3367	28.3523	28.4578	28.9494	28.8665	28.7307	29.2305	29.0924	29.1582	18	18	49.9	49.9	45.345	Succinyl-CoA ligase [ADP-forming] subunit beta, mitochondrial
AT3G17810	Q9LVI9	28.9467	28.9482	28.9706	29.1179	29.1191	29.0087	28.5969	28.4031	28.4655	28.2748	28.2702	28.0395	28.4605	28.2907	28.1302	14	14	52.8	52.8	46.846	Dihydropyrimidine dehydrogenase (NADP(+)), chloroplastic
AT2G33800	P93014	24.9104	24.9816	25.0644	24.1968	23.4111	24.2158	23.5577	26.044	22.5889	27.9216	28.193	27.2942	30.6516	30.9381	30.0788	9	9	35.6	35.6	32.645	30S ribosomal protein S5, chloroplastic
AT4G39200	B3H4B6	26.3651	25.377	23.9024	24.8264	24.7718	26.0078	27.4234	26.9895	27.2558	29.3422	29.1102	28.6342	30.0117	29.7114	29.8934	7	3	44.9	33.6	11.925	40S ribosomal protein S25-4;40S ribosomal protein S25-1
AT1G05190	O23049	23.6891	22.6645	25.0782	24.071	24.9067	23.5134	25.1527	24.0282	24.4035	27.445	27.4921	27.4415	30.6534	31.1933	30.0041	12	12	52.5	52.5	24.705	50S ribosomal protein L6, chloroplastic
AT2G34480	P51418	28.0715	28.2612	28.1651	27.8111	27.5796	27.6211	28.8385	28.8128	28.6504	29.176	29.166	29.0392	28.5886	28.5655	28.5626	11	6	53.9	34.3	21.307	60S ribosomal protein L18a-2;60S ribosomal protein L18a-1
AT3G22110	O81148	28.4424	28.3084	28.239	28.3597	28.2619	28.5081	28.1164	28.2521	28.2963	28.5668	28.3753	28.6197	29.0918	28.9637	29.0915	12	12	71.6	71.6	27.475	Proteasome subunit alpha type-4-A
AT5G43940	Q96533	29.5394	29.1993	28.5172	28.9909	28.6881	29.1126	28.1795	28.3845	28.8479	28.0981	27.7448	27.6079	28.0538	28.0608	28.1869	15	15	57.5	57.5	40.698	Alcohol dehydrogenase class-3;S-(hydroxymethyl)glutathione dehydrogenase
AT2G43750	P47999	26.267	26.7792	27.2288	26.9206	26.7297	27.3579	26.8973	28.0662	27.7225	28.8736	28.8579	28.7793	30.1924	30.0528	29.3187	16	13	54.8	48.5	41.656	Cysteine synthase, chloroplastic/chromoplastic
AT3G54400	Q9M2U7	27.8096	28.0692	28.1454	28.1404	27.9107	27.9061	28.5536	28.3479	28.5726	28.3239	28.199	28.075	29.4464	29.5014	29.2407	12	12	42.1	42.1	45.475
AT3G46030	Q9LZT0	26.5623	27.0079	26.9023	26.997	26.5029	28.8526	27.217	27.0291	27.3876	28.9161	28.971	29.0981	29.7817	29.4919	29.5899	4	4	26.2	26.2	15.912	Histone H2B.7;Histone H2B.10;Histone H2B.1;Histone H2B.11;Histone H2B.6;Histone H2B.3;Histone H2B.9;Histone H2B.4
AT4G29060	Q9SZD6	23.1387	24.2161	23.8458	23.9001	23.5612	23.9984	24.6048	24.3098	23.0458	28.6626	28.6929	28.7486	30.5299	30.4425	30.2521	19	19	33.2	33.2	103.78	Elongation factor Ts
AT5G64350	Q8LGG0	27.4625	27.5353	27.4534	23.5791	27.6816	27.6643	28.0608	28.1829	28.2687	29.0836	28.7274	28.9951	29.2947	29.3457	29.4157	5	5	58	58	11.987	Peptidyl-prolyl cis-trans isomerase FKBP12
AT5G19990	Q9C5U3	27.9499	28.1681	28.1902	27.826	27.9276	28.0602	28.3662	28.3389	28.6854	29.0578	28.8916	28.9165	28.4928	28.6139	28.6599	21	3	58.5	7.6	47.247	26S protease regulatory subunit 8 homolog A
AT4G37910	Q8GUM2	23.5341	22.7514	25.1157	22.7044	25.6253	25.8529	28.3452	27.6206	28.0827	29.5389	29.9018	29.2194	29.6964	29.0841	29.0182	27	23	47.1	40	73.074	Heat shock 70 kDa protein 9, mitochondrial
AT2G42910	Q680A5	23.1742	28.1704	27.3772	23.8911	27.4613	27.4672	28.2714	28.4825	27.9163	29.0562	28.8793	28.9539	22.8736	27.897	27.0263	4	4	17.8	17.8	37.56	Ribose-phosphate pyrophosphokinase 4
AT5G11200	F4JWF7	28.2383	27.9256	27.9667	27.6955	28.1109	28.1896	28.6697	28.8449	28.6344	28.9901	29.0022	29.089	28.2587	28.297	28.3894	13	13	37.8	37.8	52.859	DEAD-box ATP-dependent RNA helicase 56;DEAD-box ATP-dependent RNA helicase 15
AT4G24770	Q04836	23.4745	24.0505	23.8185	23.5267	23.7222	23.6413	24.2244	24.3986	23.8989	27.147	27.4609	27.7646	30.9875	30.5409	30.2054	14	14	48.9	48.9	34.4	31 kDa ribonucleoprotein, chloroplastic
AT3G18740	Q9LSA3	27.6517	28.0055	28.0666	27.3829	27.4849	27.3588	28.3066	28.0954	28.2893	28.8082	28.7937	28.7646	29.429	29.2601	29.1753	7	4	53.6	43.8	12.279	60S ribosomal protein L30-3;Putative 60S ribosomal protein L30-1
AT3G08030	Q9C6U3	26.3653	26.531	26.4561	26.34	26.5574	25.5326	29.3951	28.9403	29.6766	28.6959	28.7244	28.8344	28.5232	29.129	29.1316	14	14	64.7	64.7	34.7
AT1G24020	Q93VR4	23.5355	25.9872	23.6271	24.7499	25.0042	23.8681	22.6314	23.5552	23.7858	25.6171	24.9271	25.818	30.9347	30.8554	30.4799	11	11	84.5	84.5	17.054	MLP-like protein 423
AT5G37600	Q56WN1	23.5564	23.8592	23.5677	23.0067	24.9392	23.84	26.3778	25.7575	26.021	29.3312	29.4736	29.2672	29.9255	29.887	29.8451	15	9	51.7	36	39.115	Glutamine synthetase cytosolic isozyme 1-1
AT1G48030	Q9M5K3	27.9416	28.1035	28.1015	28.1143	27.4541	28.0888	28.2262	28.3181	28.3519	28.5055	28.6233	28.5584	29.1445	29.1498	29.1062	14	8	39.4	31.8	53.987	Dihydrolipoyl dehydrogenase 1, mitochondrial
AT1G03475	Q9LR75	24.1975	24.6548	22.8214	23.0305	24.1231	24.456	25.0935	25.4726	25.5213	27.8413	28.6794	27.9275	30.2827	30.3179	30.5191	19	19	60.9	60.9	43.796	Coproporphyrinogen-III oxidase 1, chloroplastic
AT1G63940	P92947	27.9898	27.7957	27.8259	27.629	27.7403	28.2557	27.8019	27.7274	27.5968	28.8453	28.71	28.7573	29.3441	29.0755	29.126	20	20	56.4	56.4	52.501	Monodehydroascorbate reductase, chloroplastic
AT2G46280	Q38884	27.1182	27.3649	23.0384	26.7451	27.4344	26.8345	28.2216	28.2665	27.8086	29.1173	29.1166	29.1385	29.3699	28.8101	29.484	15	15	62.8	62.8	36.388	Eukaryotic translation initiation factor 3 subunit I
AT4G12290	Q8L742	29.1083	29.4871	29.6704	29.542	29.4	28.6843	28.7292	28.5503	28.7636	26.9821	26.9223	27.0728	25.1891	24.6867	24.5654	13	13	26	26	83.232	Amine oxidase
AT4G25580	Q8RY15	29.5515	29.7568	29.4539	29.7425	29.5593	29.3701	28.0557	27.7393	28.0012	26.6034	25.0471	24.6662	24.2918	22.8328	22.6964	18	18	40.9	40.9	66.519
AT1G79230	O64530	28.411	28.7183	28.8201	28.7663	28.5547	28.6711	28.5826	28.6567	28.4781	28.3114	28.0785	28.0645	27.9296	27.9787	27.9819	11	11	55.3	55.3	35.628	Thiosulfate/3-mercaptopyruvate sulfurtransferase 1, mitochondrial;Sulfurtransferase
AT5G48230	Q8S4Y1	28.8014	28.8339	28.8668	28.646	28.5968	28.5826	28.3787	28.3796	28.4593	28.073	28.1017	28.1813	27.9206	28.0745	28.2975	12	12	41.7	41.7	41.411	Acetyl-CoA acetyltransferase, cytosolic 1
AT5G16050	P42645	28.2403	28.2075	28.3469	28.2782	28.5859	28.4297	28.3282	27.89	28.3278	28.2573	28.214	28.1495	28.8481	28.5942	28.7966	14	5	64.9	29.5	30.182	14-3-3-like protein GF14 upsilon
AT4G04460	F4JGD2	28.8275	28.8213	28.9842	29.0602	29.0036	28.6695	28.8173	28.6604	28.7294	28.1026	27.87	27.8452	26.8522	26.7893	27.237	14	14	39.3	39.3	55.101	Aspartic proteinase A3
AT1G22300	P48347	27.3937	27.6575	28.0326	29.0903	27.9079	27.9695	28.203	27.6699	28.0494	27.5206	28.1816	28.5725	29.2575	28.7625	29.0915	16	14	76.8	76.8	28.915	14-3-3-like protein GF14 epsilon
AT5G08300	P68209	26.9245	27.3703	27.5689	27.0442	27.4531	27.6106	27.976	27.7945	27.971	28.8881	28.8399	28.8509	29.1235	29.011	29.1126	10	7	46.7	30	36.151	Succinyl-CoA ligase [ADP-forming] subunit alpha-1, mitochondrial
AT1G32060	P25697	27.6032	27.805	28.0097	27.7383	27.6608	27.6777	27.1984	27.1985	27.1807	27.6377	27.6273	27.589	29.829	29.5058	29.4062	14	14	43.8	43.8	44.463	Phosphoribulokinase, chloroplastic
AT1G54100	Q9SYG7	28.8114	28.6691	28.9195	28.8025	28.5647	28.7573	28.7864	28.5405	28.5311	27.5651	27.8833	27.8584	26.3578	25.0503	26.6531	12	12	30.9	30.9	54.208	Aldehyde dehydrogenase family 7 member B4
AT3G16450	O04311	24.641	24.3543	23.5963	24.5124	24.9434	24.0471	24.7997	25.2391	24.0032	27.9003	27.9285	28.1527	30.6099	30.2249	30.2016	16	16	62.3	62.3	32.022	Jacalin-related lectin 33
AT5G64570	Q9FLG1	28.3627	28.5203	28.7055	28.6114	28.8205	28.8012	28.6697	28.654	28.6831	28.0864	27.7269	27.8364	27.1882	27.7899	28.094	14	14	29.8	29.8	84.307	Beta-D-xylosidase 4
AT1G57660	Q9FDZ9	26.9803	27.1225	27.4769	27.033	26.9054	27.6715	27.7325	28.0064	27.9496	28.8891	28.8942	28.6583	29.0799	28.9357	28.8814	7	7	45.1	45.1	18.709	60S ribosomal protein L21-2;60S ribosomal protein L21-1
AT5G30510	Q93VC7	23.153	23.565	24.5865	23.6356	23.893	24.6896	25.3645	25.2526	26.1329	27.7046	28.4369	28.4019	30.2202	30.2272	29.9942	18	18	44.5	44.5	45.11
AT4G11150	Q39258	23.6382	25.6899	25.517	26.1278	26.241	24.6919	26.6865	26.1781	26.9351	28.5092	28.5342	28.4429	29.8632	29.8829	29.9207	14	9	69.1	59.6	26.06	V-type proton ATPase subunit E1
AT1G11860	O65396	27.2376	26.6054	26.6168	27.1175	26.3825	26.2127	26.9202	27.4751	27.3354	26.911	27.6205	27.1987	29.9007	29.8196	29.9249	21	21	59.8	59.8	44.444	Aminomethyltransferase, mitochondrial
AT2G31390	Q9SID0	27.0724	26.6547	26.827	27.4409	26.9291	26.741	27.9031	27.8448	27.0378	28.9256	28.9098	28.879	29.1496	29.0704	29.0634	17	16	73.5	70.8	35.275	Probable fructokinase-1
AT2G43030	Q9SKX4	22.8966	23.0663	22.3123	24.162	23.3404	24.3536	22.9735	23.4957	22.9238	27.5083	27.9055	27.731	30.7346	30.2838	29.8222	11	11	44.6	44.6	29.363	50S ribosomal protein L3-1, chloroplastic
AT5G64140	P34789	26.2697	26.5471	26.6875	25.3042	26.0932	26.5506	27.189	26.7028	26.7577	28.9101	28.1901	28.5187	30.2063	29.5213	29.2149	8	7	62.5	53.1	7.3404	40S ribosomal protein S28-2
AT3G03250	A0A1I9LT03	27.3934	26.9271	27.1417	27.1619	26.9863	26.8769	26.7771	27.1366	27.1864	28.4066	28.4333	28.4438	29.2831	29.335	29.5683	32	13	77.5	37.1	51.115	Probable UTP--glucose-1-phosphate uridylyltransferase 2
AT4G16160	Q0WMZ5	28.7596	28.7216	28.6682	28.9565	28.341	28.611	27.9705	27.9737	28.2282	28.7279	28.2555	27.9044	27.4394	27.5957	24.0298	7	7	60.2	60.2	18.586	Outer envelope pore protein 16-2, chloroplastic
AT5G54770	Q38814	28.2503	28.1781	28.5172	28.4638	28.5256	28.3161	28.0296	28.3072	28.2368	28.0402	28.0829	27.7259	28.2853	28.4312	28.3259	11	11	57.1	57.1	29.362	Thiamine thiazole synthase, chloroplastic
AT3G51880	F4J5M5	28.9651	28.7135	28.9501	28.6431	28.6397	28.9234	28.7357	28.657	28.7336	27.8732	27.9718	28.0127	23.0467	23.8331	24.9914	2	2	16.8	16.8	18.319	High mobility group B protein 1
AT3G18780	Q0WL95	27.4544	27.5563	27.4785	27.9928	28.1783	27.3034	28.3367	27.888	27.4985	28.4261	28.5727	28.6551	28.7394	28.6124	28.7959	19	8	58.4	32.6	41.876	Actin-8;Actin-2
AT2G44120	F4IT48	28.824	27.8593	27.5606	28.9098	27.3225	28.5462	28.5052	27.4649	27.7092	28.5856	28.5757	28.5787	27.9458	26.0912	28.2374	10	6	47	33.6	28.519	60S ribosomal protein L7-3;60S ribosomal protein L7-4
AT2G01250	P60040	28.0686	27.8286	28.0128	27.5645	27.5021	27.843	28.5389	28.2823	28.3136	28.8306	28.5746	28.5528	27.7431	28.0023	28.2665	9	5	43.4	29.8	28.171	60S ribosomal protein L7-2
AT2G32120	Q9SKY8	28.8521	28.8411	28.5759	29.3033	28.922	28.4156	28.8355	28.922	28.7037	26.9225	26.7093	27.8041	25.2262	25.7887	26.321	14	14	41	41	60.989	Heat shock 70 kDa protein 8
AT5G35660	Q9FJS3	29.4213	29.3959	29.0929	29.6071	29.3939	28.8977	28.3869	27.7947	27.8547	25.7893	23.3144	23.8165	23.2528	24.0124	23.6757	2	2	17.5	17.5	31.628
AT5G42790	P34066	27.5841	28.0007	27.6115	28.0642	27.6392	27.9818	27.9316	27.9222	28.2435	28.2331	28.164	28.1972	28.7298	28.5639	28.4931	12	12	75.9	75.9	30.476	Proteasome subunit alpha type-1-A;Proteasome subunit alpha type-1-B
AT4G33680	Q93ZN9	25.5733	25.3081	24.5169	22.7035	25.3782	24.9291	26.4923	27.048	26.6269	28.7346	28.7866	28.757	29.5055	29.2529	29.8172	16	16	54.2	54.2	50.396	LL-diaminopimelate aminotransferase, chloroplastic
AT4G35450	F4JN13	24.2006	24.706	23.4993	23.259	23.2146	23.6534	26.2463	23.0536	26.3875	28.2116	28.2081	28.0947	30.2749	29.8048	29.5685	11	9	55.1	49.4	38.056	Ankyrin repeat domain-containing protein 2
AT1G07320	Q2V4Q4	24.0663	23.5616	24.0888	24.2136	23.5306	22.6438	23.89	24.1648	23.1434	27.8768	27.7201	27.2864	30.4184	30.3257	29.7986	6	6	35.6	35.6	30.142	50S ribosomal protein L4, chloroplastic
AT2G21620	Q9SIJ8	22.9075	27.926	23.0724	27.553	24.3016	23.8472	23.0913	23.797	28.0108	27.9438	27.6258	27.72	28.1319	28.2715	28.2665	7	7	61.5	61.5	20.587
AT2G44350	P20115	28.0291	28.2843	28.3346	28.4015	28.3551	28.2743	28.6146	28.4457	28.6006	28.1122	28.1741	28.1053	27.2854	26.9159	27.2737	17	17	55.6	55.6	52.654	Citrate synthase 4, mitochondrial
AT5G47210	Q9LVT8	23.8936	23.8522	24.4458	24.4143	25.7993	24.8481	26.4645	26.5891	26.0963	28.6573	28.9469	28.6747	29.6975	29.4942	28.6081	14	13	52.9	49.6	37.999
AT1G17100	Q9SHG8	28.3357	28.641	28.5023	28.5369	28.4328	28.4791	28.0711	28.2238	28.2487	27.5707	27.6239	27.8934	27.8677	27.5037	27.9479	7	7	51.7	51.7	25.388
AT3G50970	P42758	28.2726	28.7972	28.8142	28.8667	28.3376	29.3446	27.9372	28.638	28.4702	27.4451	27.4554	26.9871	23.0722	23.8847	27.3758	3	3	35.8	35.8	20.909	Dehydrin Xero 2
AT1G09310	Q9ZPZ4	23.284	25.0292	23.6357	23.9983	23.6137	23.0138	23.2265	24.0989	24.4306	28.3563	26.91	26.954	30.235	30.0445	30.1571	13	13	79.9	79.9	19.947
AT4G37930	Q9SZJ5	24.0188	23.2996	24.6315	24.319	23.8993	23.9653	25.5433	25.3022	25.6707	26.4471	26.9309	26.5736	30.4737	30.1123	29.6695	20	10	57.1	33.8	57.4	Serine hydroxymethyltransferase 1, mitochondrial
AT5G51970	Q9FJ95	28.0968	28.1845	28.368	28.2997	28.4953	28.2377	28.203	28.2608	28.3001	27.743	27.8881	28.1096	28.0279	27.7421	27.4438	13	13	51.4	51.4	39.255	Sorbitol dehydrogenase
AT5G52650	Q9LTF2	27.2464	27.4574	27.7902	26.7261	26.7898	27.0376	28.2399	27.8112	27.5579	28.7852	28.5367	28.3564	28.6298	28.7315	28.5527	6	6	40.8	40.8	19.551	40S ribosomal protein S10-3;40S ribosomal protein S10-1
AT5G58290	Q9SEI4	27.7633	27.1482	27.138	26.8557	27.332	27.3913	27.4707	27.581	27.7671	28.6735	28.5214	28.5544	28.7445	28.7527	28.7571	16	15	48.8	48.8	45.751	26S protease regulatory subunit 6B homolog
AT1G33790	Q9LQ31	24.8077	24.286	24.1298	25.8072	25.5409	26.3489	27.8973	28.128	28.2857	29.1821	28.6098	28.5162	29.2088	28.748	28.6995	19	19	42.3	42.3	81.842	Jacalin-related lectin 4
AT2G45470	O22126	28.0852	28.4561	28.3308	28.2053	27.9666	28.1571	27.1115	27.013	27.3604	26.999	26.5938	26.6402	29.0868	29.0342	28.5463	7	6	29	29	43.074	Fasciclin-like arabinogalactan protein 8
AT3G53990	Q9M328	28.3022	28.3166	28.6344	28.282	28.3709	28.5363	28.0243	27.9688	28.385	27.9196	28.2581	28.2809	26.7028	26.6937	27.6044	7	7	71.2	71.2	17.793
AT2G36880	Q9SJL8	24.6088	24.1812	24.4464	25.4659	23.635	24.0836	24.6649	23.7885	24.0398	28.5378	28.7147	28.5112	29.5518	29.7582	29.7654	15	9	56.2	39.2	42.497	S-adenosylmethionine synthase 3
AT5G35590	O81146	27.6166	27.7511	27.6583	27.6684	27.7964	27.8243	27.509	27.8395	27.7014	28.1923	28.3179	28.2305	28.7368	28.6652	28.744	12	6	71.5	49.2	27.294	Proteasome subunit alpha type-6-A
AT1G20340	P42699	27.2817	27.5932	22.8399	27.1685	27.2638	27.1857	27.1984	23.2074	23.5774	27.4036	27.4547	27.5865	29.6814	29.6995	29.4584	3	3	41.3	41.3	16.984	Plastocyanin major isoform, chloroplastic
AT1G06290	P0CZ23	26.0235	26.5899	26.4885	25.1308	27.0039	25.928	27.4785	27.3506	27.4657	29.2866	29.2049	29.1284	27.6769	28.2002	28.9993	21	21	44.9	44.9	75.675	Acyl-coenzyme A oxidase 3, peroxisomal
AT3G12145	Q9LH52	28.3325	28.4107	28.2174	27.9698	28.4523	28.379	28.6075	28.2085	28.394	27.8468	27.6299	27.5153	27.7671	27.7129	27.6664	8	8	38.8	38.8	35.808
AT3G08580	P31167	27.2933	27.142	27.2363	27.4595	27.398	27.3137	27.3828	27.6627	27.8953	29.6886	28.8644	28.7506	27.4264	27.4028	27.4651	8	6	26	21.3	41.475	ADP,ATP carrier protein 1, mitochondrial
AT1G11580	Q1JPL7	23.5668	23.5923	23.5299	23.4596	22.2147	23.0896	22.7374	23.1941	22.6339	29.2128	29.2871	29.146	29.4716	29.2808	29.3448	12	12	23.9	23.9	61.687	Pectinesterase/pectinesterase inhibitor 18;Pectinesterase inhibitor 18;Bifunctional pectinesterase 18/rRNA N-glycosylase
AT4G34260	Q8L7W8	28.2843	28.6257	28.6764	28.575	28.5359	28.6731	28.3023	28.2594	28.3191	27.5186	27.3799	27.3371	26.8327	27.3491	27.5891	13	13	25.9	25.9	93.724	Alpha-L-fucosidase 2
AT5G54190	Q42536	23.5441	24.5667	23.2539	25.0408	23.1934	22.844	24.15	25.3586	23.6107	27.1641	27.2986	27.3188	30.2157	30.2379	29.9873	24	12	54.1	29.9	43.862	Protochlorophyllide reductase A, chloroplastic
AT5G07830	Q9FF10	28.2838	28.2565	28.3229	28.2598	28.2478	28.2034	28.2625	28.2005	28.2988	27.8843	27.7861	27.8248	27.58	27.8944	27.8437	9	9	27.1	27.1	60.25	Heparanase-like protein 1
AT5G38470	Q84L30	27.477	27.6194	27.8189	28.0959	27.7117	27.5792	27.6998	27.9468	27.7076	28.1137	28.1489	28.0793	28.7619	28.2729	28.3142	8	7	33.3	31	40.066	Ubiquitin receptor RAD23d
AT1G08360	Q8VZB9	26.8056	27.1417	27.5985	26.9251	26.6883	26.5576	27.5898	27.9832	27.5524	29.1293	28.5654	28.5114	28.552	28.378	28.5212	6	4	28.2	17.6	24.469	60S ribosomal protein L10a-1;60S ribosomal protein L10a-3
AT1G16350	Q9SA34	27.4875	27.4212	27.6562	27.6246	27.206	27.0552	28.0296	27.6798	27.6697	28.7414	28.451	28.2586	28.5921	28.4943	28.4443	8	8	36.5	36.5	54.051	Inosine-5-monophosphate dehydrogenase 2
AT2G31670	Q9SIP1	27.7683	27.6524	27.9231	27.8369	27.933	28.0275	27.9031	27.0967	27.616	27.7043	27.826	27.6195	29.0159	28.5214	28.5966	8	8	48.7	48.7	28.865
AT5G57290	F4KAM0	23.2666	24.6484	23.3592	24.1615	25.2353	23.7721	23.4078	23.4577	23.1528	22.3569	27.9585	28.2891	29.4007	29.1819	28.9819	3	3	30.3	30.3	8.9448	60S acidic ribosomal protein P3-2
AT2G44100	Q96254	28.2759	28.089	28.0405	27.9658	28.0454	28.1072	28.0243	27.9754	27.9564	28.2677	28.0085	28.1694	27.7233	27.7963	27.9795	13	8	43.9	23.2	48.438	Guanosine nucleotide diphosphate dissociation inhibitor 1
AT1G58684	Q93VB8	27.0755	27.0949	27.2875	26.4509	26.9571	27.2052	28.4512	27.9162	28.166	28.7489	28.376	28.4135	28.1847	27.5499	28.5309	8	3	30.6	15.5	30.771	40S ribosomal protein S2-2;40S ribosomal protein S2-1
AT4G39730	O65660	27.5234	27.8344	27.9066	27.791	27.6703	27.9516	27.7771	28.0007	28.0644	27.8651	27.5917	27.6459	28.5173	28.4082	28.3397	4	3	27.1	21.5	20.136
AT1G73230	Q9CAT7	27.4328	27.5539	27.2181	27.6283	26.9558	28.0343	27.3662	26.7533	27.2809	28.2604	28.587	28.8823	28.6501	28.7152	28.2208	10	9	70.9	66.7	18.004	Nascent polypeptide-associated complex subunit beta
AT4G31990	F4JTH0	27.9555	27.7478	27.8307	27.8305	27.9897	27.7372	27.509	27.6512	27.3068	27.7706	27.8644	27.8386	28.7387	28.8117	28.4496	15	14	37.9	35.9	49.324	Aspartate aminotransferase;Aspartate aminotransferase, chloroplastic
AT4G29010	Q9ZPI6	28.1304	28.2714	28.2656	28.2076	28.0419	28.3649	27.9977	27.8951	28.0247	28.3229	28.0002	28.0367	25.5823	26.4035	25.6991	13	13	30.1	30.1	77.857	Peroxisomal fatty acid beta-oxidation multifunctional protein AIM1;Enoyl-CoA hydratase/3-2-trans-enoyl-CoA isomerase/3-hydroxybutyryl-CoA epimerase;3-hydroxyacyl-CoA dehydrogenase
AT3G11830	Q9SF16	27.398	27.5159	27.6532	27.6562	27.4726	27.8489	28.2714	27.8427	28.1473	28.5153	28.4989	28.3889	26.772	27.5068	27.9389	16	16	47.6	47.6	59.515	T-complex protein 1 subunit eta
AT5G66760	O82663	27.4659	28.0264	27.8097	28.2764	28.0815	27.8053	28.4073	28.3211	28.2668	28.1641	28.3416	28.3298	27.4129	26.5451	27.0809	12	12	31.1	31.1	69.656	Succinate dehydrogenase [ubiquinone] flavoprotein subunit 1, mitochondrial
AT3G44310	P32961	27.9647	27.4459	27.7459	27.5352	27.5307	27.643	27.019	27.6389	27.4897	27.8104	27.7215	27.8441	28.9487	28.5915	28.8028	12	7	51.7	39.3	38.152	Nitrilase 1
AT5G15090	Q9SMX3	27.2878	27.6869	27.1503	23.1213	23.2987	27.2944	26.3679	26.0296	27.9817	28.9479	28.0386	27.7911	29.7625	28.2878	27.7487	11	9	55.8	51.1	29.21	Mitochondrial outer membrane protein porin 3
AT3G14067	Q9LVJ1	28.4708	28.7435	28.3394	28.7461	28.2403	28.0751	27.341	27.0303	27.591	27.1571	26.8969	27.698	28.0468	28.1476	28.0721	17	17	34.4	34.4	81.816
AT3G18080	Q9LV33	28.2878	28.4203	28.6138	28.2576	28.33	28.3244	28.2891	27.9363	28.2293	27.5177	27.5272	27.2563	27.1929	27.5059	27.4109	13	13	29.5	29.5	58.983	Beta-glucosidase 44
AT3G26380	F4JCI4	28.3181	28.1991	28.5352	28.272	28.2531	28.3277	28.4073	28.4099	28.2997	27.2102	27.5415	27.4754	27.4591	27.321	27.0498	12	12	27.5	27.5	72.342
AT5G38170	Q9FF39	28.163	28.0014	27.4674	28.3235	28.4222	27.4311	28.8112	28.8615	28.8874	27.9549	27	27.5222	27.0967	26.8387	27.0162	3	3	36.9	36.9	10.936
AT3G60820	P42742	28.0817	27.5678	27.7017	27.7207	27.7443	27.5923	27.8623	27.5424	27.655	27.9135	27.9728	27.8592	28.2783	28.2537	28.539	10	10	65	65	24.644	Proteasome subunit beta type-1;Proteasome subunit beta type
AT1G72680	Q9CAI3	28.3838	28.3972	28.4078	28.464	28.2013	28.4615	28.2625	28.5237	28.3768	27.5959	27.4668	27.5642	26.3895	26.9063	26.8292	11	11	54.9	54.9	38.671	Probable cinnamyl alcohol dehydrogenase 1
AT4G28440	O49453	26.4997	26.7833	26.6084	26.6636	26.4322	26.1351	27.1507	27.09	26.7813	28.4787	28.4111	28.2955	29.327	29.1884	28.8707	5	5	49.7	49.7	16.459	Uncharacterized protein At4g28440
AT4G16143	F4JL11	27.5797	27.5475	27.7096	27.8183	27.601	27.5427	28.2399	28.4147	28.233	28.1765	28.2606	28.1013	27.7333	27.8517	27.925	11	9	41.7	37	58.906	Importin subunit alpha-2
AT3G05530	Q9SEI2	26.9899	27.2086	27.1982	27.1302	27.4036	27.5328	27.7833	27.9825	27.6163	28.8102	28.6327	28.6202	27.2686	28.302	28.0407	11	10	38.2	35.4	47.48	26S protease regulatory subunit 6A homolog A;26S protease regulatory subunit 6A homolog B
AT5G49910	Q9LTX9	25.3095	25.756	25.6664	25.5121	26.8434	25.883	26.632	25.7022	25.4342	28.0468	28.1147	28.1313	29.7107	29.5049	29.2342	35	12	43.9	14.8	76.996	Heat shock 70 kDa protein 7, chloroplastic
AT1G17880	Q9SMW7	26.2997	26.6647	26.7903	26.867	26.6926	27.1132	27.4394	27.3462	27.5736	28.7157	28.6406	28.6129	26.8761	28.649	28.4804	7	6	46.1	41.8	17.946	Nascent polypeptide-associated complex subunit beta
AT2G41530	Q8LAS8	27.9187	28.1369	27.8819	28.0795	28.07	27.8927	27.976	27.9259	27.9714	27.949	27.8294	27.8637	27.8862	27.7293	27.9317	10	10	50	50	31.655	S-formylglutathione hydrolase
AT1G47128	P43297	24.7621	23.2033	23.8669	23.5543	24.9461	23.7283	24.2749	23.8879	23.3727	28.6742	28.3246	28.4364	29.6425	29.6028	29.6363	7	6	18.2	18.2	50.966	Cysteine proteinase RD21a
AT1G14320	Q93VT9	27.6812	26.9834	26.6262	26.7732	26.9201	26.9659	27.9595	28.0716	28.2895	28.5951	28.455	28.6039	27.0875	27.3976	27.9285	9	2	39.5	10	24.917	60S ribosomal protein L10-1
AT2G27020	O23715	27.4339	27.8838	27.3024	27.691	27.4084	27.2634	27.5969	27.34	27.441	28.1653	28.0991	27.9894	28.6644	28.477	28.6108	7	7	32.9	32.9	27.377	Proteasome subunit alpha type-3
AT3G52880	F4J849	23.8596	23.9942	25.4513	23.2957	25.1131	23.4252	26.0526	23.6329	25.7351	27.9721	28.0567	27.9399	29.876	29.739	29.3708	17	17	53.6	53.6	50.159	Probable monodehydroascorbate reductase, cytoplasmic isoform 3
AT5G02870	F4KDU5	22.618	24.6814	26.9548	23.3482	23.6147	22.7648	27.5754	27.3528	27.4232	28.3963	28.9271	28.6739	28.3016	28.9083	29.1773	17	7	44.6	17.2	44.592	60S ribosomal protein L4-2
AT5G54430	Q8VYN9	27.6075	27.8635	27.6449	27.8222	27.7806	27.8895	27.8741	27.9529	27.8876	28.0064	27.794	27.9047	27.9565	28.1432	28.0653	11	10	78.9	78.9	26.202
AT5G10450	F4KGV2	27.6625	27.4237	27.2938	27.5942	27.6417	27.3637	27.4862	27.4687	27.6397	27.6377	27.6003	27.8274	28.2255	28.3345	28.3986	11	6	62.6	42.7	27.718	14-3-3-like protein GF14 lambda
AT2G27720	P51407	27.9135	28.0762	27.9505	28.5292	27.8252	28.6401	27.611	27.3169	27.6226	27.4571	27.7583	27.6688	26.4558	27.3207	27.2701	9	5	80.9	68.7	11.452	60S acidic ribosomal protein P2-1
AT4G36600	F4JQF1	28.9287	28.9624	28.9213	28.8805	28.6513	29.1333	27.7645	27.6048	27.8286	23.4134	23.8399	26.0419	24.6099	23.5758	23.4723	8	8	30.6	30.6	37.959
AT4G32770	Q94FY7	27.7696	28.0429	28.0642	28.5849	28.5356	28.2181	28.17	27.8964	28.0923	27.7216	27.5888	27.4971	27.3065	27.0103	27.3062	11	11	34	34	54.72	Tocopherol cyclase, chloroplastic
AT2G19520	O22607	27.3856	27.4271	27.3534	27.6027	27.648	27.7014	27.8741	27.7806	27.7974	27.9661	27.9241	28.141	28.2931	27.9657	27.9324	10	10	37.1	37.1	55.758	WD-40 repeat-containing protein MSI4
AT4G27150	P15458	28.974	29.2782	29.1782	28.731	28.6512	28.7772	27.7771	27.6814	27.9552	24.2554	25.5209	25.4361	23.9867	23.4996	23.4208	8	2	40	17.1	19.361	2S seed storage protein 2;2S seed storage protein 2 small subunit;2S seed storage protein 2 large subunit
AT5G54640	Q9LD28	26.3961	27.142	27.4478	26.7304	26.5141	27.5686	26.2535	28.1859	26.8776	29.154	28.3002	28.3932	28.0975	28.3258	27.9674	4	1	40	22.3	13.658	Histone H2A.6;Probable histone H2A.3;Probable histone H2A.2;Probable histone H2A.1
AT5G06060	Q9LHT0	27.9903	28.1495	28.1234	28.2561	28.009	27.9057	27.7645	27.7214	28.0362	27.7438	27.369	27.7375	27.3496	27.2313	27.3838	10	10	50.8	50.8	28.292	Tropinone reductase homolog At5g06060
AT3G48000	Q9SU63	27.2084	27.5943	27.4776	28.2752	27.6472	27.6293	28.2262	28.0707	28.2291	27.8152	28.3145	27.9987	27.2724	27.2897	27.3629	10	10	28.3	28.3	58.588	Aldehyde dehydrogenase family 2 member B4, mitochondrial
AT2G40490	O22886	24.0599	23.7185	23.1154	23.6156	22.8101	24.2032	23.7221	23.4364	22.8973	27.6906	27.7112	27.6204	29.8984	29.7062	29.7178	14	14	43.7	43.7	43.579	Uroporphyrinogen decarboxylase 2, chloroplastic
AT2G19480	F4ISI7	23.7137	24.1958	23.711	23.5753	25.3117	23.197	26.8858	26.9792	26.7103	28.677	28.911	28.8187	29.0953	28.4752	28.7236	10	9	32	28.8	42.846	Nucleosome assembly protein 1;2
AT1G62750	Q9SI75	23.9683	22.354	24.1275	24.678	23.8559	23.6951	23.7594	23.4875	25.0257	27.0626	27.1835	27.1619	29.7702	29.9205	29.7806	23	23	46.6	46.6	86.057	Elongation factor G, chloroplastic
AT4G02770	Q9S7H1	25.1088	25.2295	24.6427	22.8877	23.7254	23.5395	23.6691	23.7712	23.8719	25.7459	25.8917	25.7055	30.596	29.8525	29.3065	15	15	65.4	65.4	22.598	Photosystem I reaction center subunit II-1, chloroplastic;Photosystem I reaction center subunit II-2, chloroplastic
AT5G60980	F4K1Y4	26.6558	24.3539	24.9627	26.693	26.887	26.2743	26.4831	27.0126	27.2028	27.5599	27.8519	27.6365	29.3718	29.319	28.9407	12	12	43.6	43.6	49.415
AT2G44650	O80504	24.8161	24.4941	24.6664	24.8108	24.6907	24.5159	24.9803	24.845	25.8621	27.9427	27.9459	27.7891	29.7865	29.5864	29.2802	7	6	53.2	46.8	15.049
AT5G56260	Q9FH13	23.3299	24.0759	22.7768	22.5996	24.6718	26.297	26.673	29.353	27.2847	28.1714	28.2113	27.9134	28.7459	28.8292	28.6916	10	10	58.4	58.4	17.567	Putative 4-hydroxy-4-methyl-2-oxoglutarate aldolase 3
AT1G69620	Q9FE65	24.1788	24.4848	26.7124	24.0571	24.2416	23.5401	27.1312	27.4333	27.2557	29.0219	28.7161	28.17	29.2236	28.4071	28.2748	5	3	21.8	12.6	13.65	60S ribosomal protein L34-2
AT5G39720	Q9FIX2	28.6122	28.4814	28.7963	28.6924	28.6072	28.5934	28.0243	28.0095	28.0499	26.0784	25.806	25.8735	24.2467	24.1168	24.7525	4	4	37.6	37.6	19.103	AIG2-like protein
AT1G07140	Q9LMK7	23.491	26.882	25.8425	26.5866	26.5956	25.9065	26.6595	26.4115	25.5563	27.5102	27.8163	27.6326	29.5205	29.3868	29.1165	8	6	49.1	39	25.601	Ran-binding protein 1 homolog a
AT3G11930	F4J8J7	27.9993	28.1687	28.0832	28.0629	28.2012	28.1618	28.0914	27.948	28.0349	27.6062	27.4147	27.6384	26.8327	26.9488	27.1196	8	8	54.8	54.8	21.457
AT1G07080	Q93VQ6	28.1909	28.1914	28.1201	28.3127	28.3847	28.1469	28.4032	28.5364	28.0599	27.3299	27.1096	27.7092	25.5692	25.6738	25.8419	4	4	25.7	25.7	29.698
AT4G31700	O48549	26.1212	22.5093	22.5323	23.8661	25.9756	24.5679	26.7645	26.325	26.5735	28.775	28.4821	28.7193	28.9215	28.6863	28.9825	10	3	30.4	10.8	28.367	40S ribosomal protein S6-1
AT5G06760	Q9FG31	28.8289	28.8061	28.8799	28.8686	28.5853	28.9561	27.5754	27.8952	27.7607	24.112	23.6348	23.5241	24.496	24.8232	23.7599	4	4	44.9	44.9	16.179
AT1G29680	Q9C7N3	28.4936	28.148	28.1574	28.2684	28.3158	28.3887	27.9539	27.9304	27.9934	27.1794	27.1523	27.0713	26.4125	27.2952	27.2713	13	12	69.6	65.8	26.875
AT5G03630	Q93WJ8	23.4929	23.2442	23.19	23.8344	23.7285	24.4136	22.7438	27.7993	23.2961	28.3166	28.1269	27.9432	29.5321	29.4616	29.217	15	14	50.3	49	47.479	Probable monodehydroascorbate reductase, cytoplasmic isoform 4
AT3G56340	Q9LYK9	27.2191	26.3562	26.9597	26.2963	26.7005	26.6041	27.5389	27.3898	27.5144	28.2623	28.3151	28.1771	28.3128	28.1584	28.2554	4	4	30	30	14.628	40S ribosomal protein S26-3;40S ribosomal protein S26-1;40S ribosomal protein S26-2
AT2G45710	O64650	27.4675	27.2931	27.1152	26.3349	27.1745	23.2602	28.189	23.4564	27.4066	28.1876	28.2497	27.9701	28.5302	28.3963	28.3949	5	3	47.6	31	9.405	40S ribosomal protein S27-1;40S ribosomal protein S27-2
AT3G44890	P25864	22.4897	23.8853	24.21	23.955	22.8453	23.375	23.4239	24.5551	23.5896	27.6025	27.6482	27.5203	29.9535	29.7617	29.3089	9	9	46.7	46.7	22.134	50S ribosomal protein L9, chloroplastic
AT3G22890	Q9LIK9	23.1192	23.1859	24.7474	24.7245	22.9477	24.9688	26.7389	27.1994	26.4905	28.3548	28.5971	28.3277	29.2091	28.9018	28.851	16	10	49.2	35.6	51.458	ATP sulfurylase 1, chloroplastic
AT1G66430	Q9C524	28.4028	28.3604	28.3383	28.3906	28.2102	28.0634	27.6527	27.7676	27.8812	26.8062	26.994	26.8807	27.292	26.7372	26.6092	6	6	20.6	20.6	41.471	Probable fructokinase-6, chloroplastic
AT3G55800	P46283	23.5005	24.2398	24.5208	23.1149	23.7766	24.4884	24.6257	23.4112	22.8731	23.9521	25.2018	25.0216	30.1861	29.854	29.4116	17	17	46.1	46.1	42.414	Sedoheptulose-1,7-bisphosphatase, chloroplastic
AT2G24270	F4INS6	27.9764	28.142	28.0428	27.6048	27.593	28.1757	27.7453	27.1334	27.2539	27.9265	27.9584	27.2455	26.1208	27.6917	27.6765	19	19	61	61	53.849	NADP-dependent glyceraldehyde-3-phosphate dehydrogenase
AT4G16500	Q84WT8	27.2508	27.2714	27.3072	27.3769	27.0181	27.1835	27.2891	27.2856	27.1116	27.8443	27.5057	27.6819	28.8026	28.5235	28.4436	5	5	35.9	35.9	12.556	Cysteine proteinase inhibitor 4
AT4G34180	Q93V74	27.9848	28.2607	28.1894	28.2853	27.9413	28.0983	27.8682	27.8108	28.1177	27.1539	27.2349	27.4318	26.4228	26.6859	27.0174	6	6	34.5	34.5	28.384
AT5G54960	Q9FFT4	27.938	28.1574	28.0565	28.2891	28.3716	28.0535	28.5682	28.4233	28.4605	27.1891	27.1098	27.2077	24.272	23.9528	24.3123	10	10	34.4	34.4	65.817	Pyruvate decarboxylase 2
AT1G27970	Q9C7F5	26.7278	24.797	27.6066	23.5644	23.7623	26.6071	27.2803	23.636	26.7907	28.2877	28.1557	28.5293	28.6134	28.6024	28.7031	6	6	88.1	88.1	14.002	Nuclear transport factor 2
AT2G34420	Q39141	24.0459	24.2638	24.0442	22.9753	24.0568	24.5728	23.19	24.4604	24.9974	26.8162	25.4521	23.9761	29.7726	30.4352	29.4887	9	0	59.6	0	28.054
AT5G66090	Q9FKX3	28.3409	28.1836	28.3464	28.4515	27.9564	27.972	27.7833	27.7315	27.6649	26.8767	26.9458	26.5438	27.2063	27.0491	27.0331	7	7	36.2	36.2	22.54
AT5G65430	F4KHY7	27.9215	27.8522	27.9667	27.9627	28.2056	28.1093	27.6865	27.4595	27.4976	27.3102	27.5802	27.0487	27.6937	27.6171	27.5591	10	4	55	30.8	29.53	14-3-3-like protein GF14 kappa
AT3G13470	Q9LJE4	23.5553	23.7687	23.5267	22.7999	23.2214	24.5461	23.3853	24.9022	25.715	27.9785	28.1086	28.2354	29.3143	29.4179	29.3903	37	8	66.8	17.6	63.341	Chaperonin 60 subunit beta 2, chloroplastic
AT1G43670	Q9MA79	27.1469	27.0324	26.3204	25.9286	24.5308	25.8068	27.2979	27.727	27.6403	28.5681	28.7791	28.675	27.565	27.6676	27.8438	14	14	52.8	52.8	37.287	Fructose-1,6-bisphosphatase, cytosolic
AT3G14310	O49006	23.6949	23.9063	24.8162	23.2399	24.8496	23.9093	25.6676	25.7055	25.3207	28.2649	28.3818	28.5377	29.223	28.9194	29.1341	11	11	26.7	26.7	64.255	Pectinesterase/pectinesterase inhibitor 3;Pectinesterase inhibitor 3;Pectinesterase 3
AT3G62530	Q94K48	24.8337	23.3007	22.5565	22.6061	23.5519	24.261	27.3153	27.2708	27.2686	28.434	28.4273	28.4525	28.9197	28.8114	28.6386	9	9	50.2	50.2	24.503
AT2G43460	O22860	26.6431	26.7798	26.7861	26.7326	26.7864	26.5358	27.2625	27.1733	26.5098	28.2011	28.443	28.1083	28.5908	28.2854	28.4187	6	6	46.4	46.4	8.1216	60S ribosomal protein L38
AT3G23400	Q9LW57	27.3727	27.294	27.4225	28.2452	28.1576	27.9337	27.6865	27.7805	27.7125	27.7108	27.7138	27.4168	27.5293	27.6157	27.4696	9	9	40.8	40.8	30.454	Probable plastid-lipid-associated protein 6, chloroplastic
AT1G54410	Q9SLJ2	23.874	24.229	24.9018	22.2539	24.9416	23.5499	23.7599	25.1242	23.4553	28.428	28.6372	28.5187	29.4501	28.6852	29.2158	1	1	17.3	17.3	10.796
AT3G11050	Q9SRL5	28.086	28.0942	28.06	28.2635	28.3773	28.6901	27.604	27.8628	27.9142	26.8199	26.7326	26.6986	26.4044	26.291	26.3793	10	10	50.6	50.6	28.378	Ferritin-2, chloroplastic
AT3G61440	Q9S757	24.3926	24.5973	25.3958	22.9416	25.1833	24.9755	25.4707	24.6201	25.1579	27.9362	27.8953	27.6581	29.7623	29.3083	28.9056	10	10	26.6	26.6	39.927	Bifunctional L-3-cyanoalanine synthase/cysteine synthase C1, mitochondrial
AT3G02090	Q42290	25.4595	26.2315	26.3246	26.7801	25.855	25.968	26.726	26.5575	26.7507	28.8796	27.933	28.3652	28.988	28.2241	28.1256	12	12	40.5	40.5	59.159	Probable mitochondrial-processing peptidase subunit beta
AT4G22670	Q93YR3	26.4178	27.0714	27.2437	26.1757	27.2939	27.1324	27.726	27.3891	27.6013	27.8748	27.606	27.562	28.5487	28.3074	27.941	11	11	35.6	35.6	46.621	FAM10 family protein At4g22670
AT3G63190	Q9M1X0	24.3495	23.9639	23.6881	23.6239	23.6071	24.9351	23.9453	23.5115	24.2906	27.0982	27.1917	26.9174	29.7469	29.7066	29.6503	9	9	36.4	36.4	30.422	Ribosome-recycling factor, chloroplastic
AT5G27850	Q940B0	24.1592	24.863	24.1752	24.045	23.725	27.0851	28.3992	28.3096	28.352	28.2713	28.1674	28.6163	24.1168	23.4403	23.4677	9	1	40.6	9.6	20.967	60S ribosomal protein L18-3
AT1G32990	Q9MAP3	23.1229	23.4419	22.6926	23.4371	24.0886	23.5356	24.6403	25.3526	24.1645	27.3234	27.8236	27.5474	29.6618	29.6244	29.284	7	7	38.3	38.3	23.148	50S ribosomal protein L11, chloroplastic
AT4G21580	O65423	28.0547	27.863	28.4725	28.1277	27.9737	28.2294	27.9705	27.9154	27.875	26.9437	26.7077	26.8236	26.8352	26.3017	26.762	8	8	36	36	34.465
AT4G11420	Q9LD55	26.6169	26.3807	26.3249	26.9109	26.8185	26.5255	28.1263	28.1574	27.7725	27.9252	28.1739	28.3185	27.983	27.4518	27.3754	10	10	14.8	14.8	114.3	Eukaryotic translation initiation factor 3 subunit A
AT1G78630	Q9SYL9	24.7096	24.332	24.1423	23.4578	24.1964	22.8377	24.3792	23.6122	24.4188	27.0559	27.2923	26.8319	29.8909	29.7795	29.1285	7	7	48.1	48.1	26.788	50S ribosomal protein L13, chloroplastic
AT5G27470	Q39230	27.0182	27.0349	27.2847	27.3662	27.036	27.2481	27.2803	27.2947	27.1662	27.9403	27.7526	27.9263	28.2084	28.1277	28.1421	16	16	56.3	56.3	51.628	Serine--tRNA ligase
AT3G52560	Q9SVD7	24.4675	26.9173	26.6252	26.8917	26.8844	26.3829	27.1507	27.2872	26.8751	27.8277	27.7769	27.8266	28.5247	28.5042	28.5059	6	0	44.5	0	16.533	Ubiquitin-conjugating enzyme E2 variant 1D
AT5G18380	A8MRX2	28.1336	27.4644	27.5464	27.3614	27.4303	27.5509	27.9705	27.71	27.8195	28.1078	28.0603	28.07	25.2248	25.5926	26.3185	6	2	29.9	8.3	16.544	40S ribosomal protein S16-3;40S ribosomal protein S16-2
AT2G17420	Q39242	23.6851	25.3316	24.8288	24.2967	25.0966	24.2177	24.8336	25.8482	22.8958	27.6511	27.6597	27.4099	29.2833	29.4578	29.2831	8	8	33.4	33.4	40.635	Thioredoxin reductase 2
AT1G22530	Q56ZI2	24.279	24.8201	24.4408	23.7502	23.8152	25.3145	23.7992	21.5081	25.6458	27.9759	28.1896	27.826	29.7439	29.0643	28.9386	14	11	28.4	23.3	76.007	Patellin-2
AT3G09500	Q9SF53	23.7774	23.5265	26.5448	25.9304	25.6607	24.4113	26.3795	26.4551	26.3638	27.4	27.8203	27.514	29.2863	29.0916	29.0596	5	2	33.3	18.7	14.285	60S ribosomal protein L35-1
AT1G02640	Q94KD8	24.4795	23.1842	24.083	24.0969	24.9541	23.8786	24.2849	24.2937	26.7493	28.9623	29.3841	29.0578	27.578	27.934	28.1309	16	16	34	34	82.984	Probable beta-D-xylosidase 2
AT2G20580	Q9SIV2	27.6632	26.9478	27.4444	27.4016	26.7347	27.8297	27.8682	27.4197	28.1373	28.1532	28.1976	28.1264	23.1604	26.4238	27.1678	11	11	20.9	20.9	98.143	26S proteasome non-ATPase regulatory subunit 2 homolog A
AT1G49760	Q9FXA2	26.9089	27.2526	27.059	26.6527	27.2541	24.9711	27.4234	27.5177	27.6125	27.9039	27.7331	27.5469	28.3897	27.9538	28.3226	12	10	25.5	20.6	72.779	Polyadenylate-binding protein 8
AT1G04170	O64490	27.216	27.4042	27.5509	27.1313	27.3311	27.2013	27.7195	27.7254	27.6885	28.037	27.9504	27.9633	26.8169	27.53	27.8106	8	8	26.7	26.7	50.853
AT5G20960	Q7G193	28.1853	27.9518	28.086	28.2353	27.9453	28.2045	28.1556	27.6668	28.1477	26.7077	27.0602	27.1876	23.9148	26.2139	24.937	19	19	23.3	23.3	149.55	Indole-3-acetaldehyde oxidase
AT3G26720	P94078	28.4087	27.8432	27.9062	28.3538	28.1073	28.3119	27.4234	27.9959	27.8474	26.6602	25.013	26.0771	27.0351	27.7256	27.1117	15	15	24.6	24.6	115.22	Alpha-mannosidase
AT3G47370	Q9STY6	24.261	24.0937	23.4903	23.5855	23.6982	23.6103	27.2354	27.0423	27.1646	28.5022	28.3462	28.1527	28.5011	28.4632	28.3442	7	2	47.5	17.2	13.693	40S ribosomal protein S20-2
AT1G23820	Q9ZUB3	27.2039	26.875	27.0849	27.1872	27.1543	27.0661	27.9539	27.8257	27.6786	28.1374	27.8261	28.0053	27.5177	27.3758	27.4937	10	6	54.5	36.5	36.553	Spermidine synthase 1
AT5G38530	Q9FFW8	27.3256	27.192	27.5033	27.3577	27.6299	27.7207	27.5463	27.7746	27.7246	27.7134	27.4565	27.5217	27.5399	27.7052	27.3898	10	10	35.4	35.4	55.741
AT1G60710	Q93ZN2	27.4721	27.1589	27.8714	27.5736	27.719	27.6388	27.673	27.6017	27.6379	27.5198	27.2915	27.2122	27.7491	27.7403	27.5959	14	8	53.3	39.1	37.924	Probable aldo-keto reductase 4
AT4G36360	Q9SCV9	28.3767	28.6713	28.812	28.6453	28.7847	28.1334	27.7645	27.8849	27.9039	25.7297	24.7177	24.7429	24.4886	23.1417	23.0006	13	13	31	31	95.064	Beta-galactosidase 3
AT1G20693	O49596	27.3437	27.5881	27.5908	27.009	26.9536	27.5947	26.9869	27.1878	27.374	27.1059	27.048	27.1553	28.7666	28.6815	27.5011	2	1	21.8	12.7	15.723	High mobility group B protein 2
AT5G17710	Q94K56	23.3241	24.0952	24.4542	23.0017	24.1956	23.2288	24.4019	25.3479	24.6819	27.44	27.2676	27.3338	29.5128	29.3383	29.5946	15	15	32.7	32.7	35.493	GrpE protein homolog
AT5G26742	Q8L7S8	23.3414	24.0382	24.3219	23.7978	23.5499	23.8344	24.0443	26.1224	23.7674	28.8259	29.2396	29.4494	27.5758	27.2177	28.2397	22	22	39	39	81.155	DEAD-box ATP-dependent RNA helicase 3, chloroplastic
AT1G74030	Q9C9C4	28.1983	27.7871	28.1028	28.265	27.862	27.7268	27.7195	27.5183	27.6668	27.3265	27.0695	27.2599	26.8321	26.7969	26.8387	13	12	39	39	51.474	Enolase 1, chloroplastic
AT2G30870	P42761	22.5484	24.1353	23.909	25.3283	23.9776	24.0001	25.7389	24.4465	24.3599	27.7626	27.4454	27.3599	29.6132	29.3053	29.2974	14	12	61.4	56.3	24.23	Glutathione S-transferase F10
AT4G14030	O23264	26.9469	26.814	27.5883	26.9366	27.1563	27.2246	26.8973	27.5029	27.0075	27.6392	27.7648	27.9729	28.0626	28.0029	28.0065	14	10	48.2	41.2	54.056	Selenium-binding protein 1
AT5G55220	Q8S9L5	25.8652	23.496	24.0746	24.9151	23.9718	23.7111	25.0104	24.6594	23.8794	27.3758	28.1155	27.5023	29.7467	28.7629	29.3248	23	23	46.4	46.4	61.733	Trigger factor-like protein TIG, Chloroplastic
AT2G02850	Q8LG89	27.6206	27.7629	27.8189	27.8968	27.6674	27.8147	27.7064	27.8595	27.8084	27.6099	27.3967	27.2405	26.8457	27.0494	27.1525	2	2	23.3	23.3	14.038	Basic blue protein
AT4G39660	Q940M2	28.0471	27.4346	27.4891	27.4436	27.7309	28.1499	28.1164	27.7678	27.9712	27.6209	26.8741	27.287	26.6604	27.3436	26.0511	10	10	36.8	36.8	51.952	Alanine--glyoxylate aminotransferase 2 homolog 1, mitochondrial
AT4G02280	Q9M111	27.9029	28.2743	28.0622	27.8647	28.3351	28.3701	28.0864	28.0376	28.3608	26.2726	26.0705	26.4171	23.9927	23.9671	23.7207	15	14	27.7	26.3	92.001	Sucrose synthase 3
AT4G08390	F4JFY5	23.9312	24.3121	26.5483	23.4958	25.2076	23.7894	26.726	26.1961	26.3557	27.8695	28.0532	27.3902	29.2273	28.6669	29.0052	8	8	34	34	40.279	L-ascorbate peroxidase S, chloroplastic/mitochondrial
AT1G75280	P52577	27.5822	27.6954	27.6902	27.5986	27.2465	27.7852	27.3239	27.2313	27.4446	27.3268	27.1087	27.5638	27.9058	27.8701	27.7139	11	11	49.4	49.4	33.736	Isoflavone reductase homolog P3
AT4G25630	Q94AH9	24.9737	24.2597	24.1395	23.2616	24.3283	24.6132	28.066	28.1314	27.8212	28.5419	28.7174	28.822	26.8702	27.1829	27.6527	8	2	39.7	8.1	33.653	Mediator of RNA polymerase II transcription subunit 36a;Probable mediator of RNA polymerase II transcription subunit 36b
AT4G16760	O65202	26.9677	27.6594	27.3584	25.9441	27.1646	27.2928	27.3494	26.8387	26.9664	28.376	27.8507	27.9929	27.3516	27.4006	27.6741	18	18	41.6	41.6	74.301	Peroxisomal acyl-coenzyme A oxidase 1;Acyl-coenzyme A oxidase
AT4G26230	Q9STR1	26.5325	26.3995	23.9986	23.2009	24.216	26.8224	26.9202	26.3347	27.0292	27.6799	27.8861	27.6162	29.1105	27.9538	28.6627	4	4	33.6	33.6	13.82	60S ribosomal protein L31-2;60S ribosomal protein L31-1;60S ribosomal protein L31-3
AT5G19770	Q56WH1	25.7536	25.9204	23.5801	26.6707	26.2602	26.7646	27.5826	27.9193	27.032	28.3572	28.2972	28.2255	27.5489	27.5976	28.0431	19	8	52.2	22.2	49.654	Tubulin alpha-3 chain;Tubulin alpha-5 chain			AT5G19780
AT3G24170	P48641	27.323	27.5451	27.2489	27.2068	26.9891	27.258	27.524	27.4923	27.0153	27.713	27.8388	27.472	28.2426	27.42	27.6329	11	11	41.1	41.1	53.87	Glutathione reductase, cytosolic
AT4G27450	Q93V62	26.672	27.2238	24.6408	27.812	27.5177	28.1043	28.3153	28.266	28.4624	27.7071	27.7376	27.8275	23.8939	24.4176	24.6666	8	8	62.4	62.4	27.622
AT3G62870	Q9LZH9	23.4124	26.4951	26.6089	26.0235	25.9613	26.0949	27.0084	27.4113	26.6562	28.449	28.1323	27.9852	28.1131	28.2364	27.9901	13	2	52	10.9	29.034	60S ribosomal protein L7a-2
AT4G24830	Q9SZX3	27.2921	27.3153	27.2483	27.1087	27.0826	27.2286	27.5682	27.6476	27.5224	27.6634	27.6876	27.9053	27.3971	27.0966	26.6238	13	13	36.2	36.2	53.845	Argininosuccinate synthase, chloroplastic
AT1G70410	Q94CE4	24.1517	25.1559	24.0404	23.4059	23.703	23.1774	25.4614	24.4994	23.962	28.0179	27.8869	28.0655	29.1949	29.1294	29.0868	14	14	68.6	68.6	28.412	Beta carbonic anhydrase 4
AT1G29880	O23627	27.1893	27.4723	27.6503	27.4767	27.5003	27.4431	27.4862	27.5683	27.5672	27.6733	27.5946	27.6337	26.9005	27.2252	27.4547	17	17	31.4	31.4	77.23	Glycine--tRNA ligase 1, mitochondrial
AT3G12290	Q9LHH7	23.5514	25.2324	25.1594	22.9241	23.856	26.3194	25.7995	23.6724	26.2259	27.0497	27.4629	27.0222	29.1028	29.532	28.6559	13	13	64.9	64.9	31.589	Bifunctional protein FolD 2;Methylenetetrahydrofolate dehydrogenase;Methenyltetrahydrofolate cyclohydrolase
AT4G35630	Q96255	26.3895	25.5783	26.1882	26.4466	26.8735	25.4076	27.2803	26.7411	26.9895	27.9797	27.944	27.6278	28.2603	28.3212	28.5617	10	10	25.3	25.3	47.359	Phosphoserine aminotransferase 1, chloroplastic;Phosphoserine aminotransferase 2, chloroplastic
AT1G35720	Q9SYT0	26.3839	25.1114	26.0339	25.3211	25.9109	26.1259	26.4282	24.9903	25.4389	27.4605	27.8975	27.819	28.7714	28.3524	29.3092	11	11	46.4	46.4	36.203	Annexin D1
AT1G48830	Q9C514	27.7643	27.2153	27.2326	27.0309	26.4206	27.2458	27.1604	27.2147	27.0263	27.6714	27.6047	28.2887	27.6884	27.8585	27.3493	11	11	53.9	53.9	21.922	40S ribosomal protein S7-1
AT1G67280	Q8W593	27.1741	27.2055	27.1232	27.3838	27.1408	27.4912	27.4314	27.4263	27.5186	27.482	27.3076	27.5975	27.5597	28.098	27.4882	10	9	33.1	33.1	39.167	Probable lactoylglutathione lyase, chloroplast
AT1G14810	Q8VYI4	24.6244	26.0884	23.7934	23.6166	23.4099	24.8079	25.2535	26.1532	24.9463	27.5734	27.4208	27.4545	29.338	29.2137	28.8946	12	12	43.7	43.7	40.745
AT5G40950	Q9FLN4	23.7381	23.3364	23.3746	22.4641	23.0111	23.3354	24.1301	23.2956	25.0994	27.7112	27.8499	27.9979	28.4575	29.8404	29.273	4	4	24.2	24.2	21.737	50S ribosomal protein L27, chloroplastic
AT1G70580	Q9S7E9	27.8209	27.9658	28.3206	27.5366	27.6784	27.6499	27.726	27.3685	27.4458	27.1617	26.8306	27.1345	26.6759	26.6237	26.9411	12	3	33.9	8.9	53.444	Glutamate--glyoxylate aminotransferase 2
AT1G03230	Q9ZVS5	27.6705	27.191	27.2069	27.149	26.4613	26.658	27.8682	27.8398	27.2122	26.9397	27.6012	27.5489	27.4973	27.6423	27.3476	10	7	29	25.6	46.148
AT1G04560	O23029	27.738	27.9287	27.3929	28.4811	27.5256	28.3496	28.4668	28.0312	28.6666	26.6672	25.8448	26.4637	24.4736	22.6218	22.7058	3	3	20.4	20.4	19.846
AT1G35160	F4HWQ5	26.4387	26.293	26.5254	26.3172	23.0232	26.3052	26.5898	26.7279	26.6183	27.421	27.7468	27.8248	28.659	28.5139	28.6816	13	4	54.6	21.7	33.356	14-3-3-like protein GF14 phi
AT3G02780	Q42553	26.6126	26.6953	26.3072	26.6638	26.1701	27.7112	27.0401	27.3309	26.6148	27.3152	27.5904	27.6011	28.3445	28.3304	28.0459	12	7	50.4	32.4	32.607	Isopentenyl-diphosphate Delta-isomerase II, chloroplastic
AT4G29040	Q9SZD4	26.471	27.1804	27.2693	26.434	26.9025	26.8265	27.3153	27.3328	27.3467	27.8237	27.9729	27.7821	27.5259	27.7935	27.8339	11	11	30.5	30.5	49.369	26S proteasome regulatory subunit 4 homolog A;26S proteasome regulatory subunit 4 homolog B
AT1G45000	Q9MAK9	26.4279	26.933	27.0505	26.5534	26.6603	27.2655	27.1214	27.3558	27.529	27.8297	27.7749	27.9857	27.656	27.6122	27.7706	16	15	57.1	54.1	44.755	26S protease regulatory subunit S10B homolog B;26S protease regulatory subunit 10B homolog A
AT5G07460	Q9LY15	27.1034	23.8302	26.9819	23.5554	24.5124	24.3594	24.337	25.1569	27.5191	27.4253	28.0705	27.8653	28.162	28.0813	28.3193	5	4	36.2	30.7	24.434	Peptide methionine sulfoxide reductase A2
AT2G45290	F4IW47	28.3201	28.4378	27.9688	28.2931	28.3947	27.897	27.2262	27.4249	27.6738	26.5385	26.4272	26.8386	25.6848	24.0253	26.0893	19	12	40.8	33.2	79.921	Transketolase-2, chloroplastic
AT1G76160	Q9SGR6	27.6459	28.0349	27.7746	27.4687	27.918	27.7132	27.3662	27.023	26.874	27.1182	26.9863	26.9209	27.1236	26.8913	27.3011	11	8	27.9	22	60.04
AT4G09010	P82281	27.2948	27.7403	27.0277	27.5706	27.1822	27.1978	26.604	26.8535	25.3571	26.8113	26.732	25.9944	28.792	28.4299	28.2748	12	12	50.4	50.4	37.934	Thylakoid lumenal 29 kDa protein, chloroplastic
AT1G13060	F4HP14	27.3619	27.1098	27.5114	27.7375	27.2722	27.4558	27.1214	27.404	27.4084	27.3776	27.4842	27.299	27.4108	27.6088	27.4932	4	2	28.5	17.1	32.344	Proteasome subunit beta type-5-A
AT4G01610	Q9ZSI0	23.3338	23.1578	24.6297	23.9818	24.4263	23.3864	27.7389	27.8266	27.6994	28.5167	28.5097	28.464	27.4404	27.6676	28.0756	6	6	25.9	25.9	39.344
AT2G20260	Q9S714	24.1908	24.0084	23.9887	23.7885	24.2228	23.3828	24.1999	23.9581	23.3564	23.5548	24.2209	23.7714	30.1183	29.6023	29.0308	5	3	49	34.5	15.189	Photosystem I reaction center subunit IV B, chloroplastic
AT5G54600	P92959	21.6882	23.2695	24.6126	23.7068	23.3518	24.2606	23.4822	23.6834	23.5965	26.5104	26.696	26.5399	29.8176	29.648	29.0416	7	7	34.3	34.3	21.976	50S ribosomal protein L24, chloroplastic
AT3G57610	Q96529	25.5811	26.0286	24.9856	25.6635	25.6185	25.9779	26.7895	26.4437	27.2783	27.9358	28.1721	28.2091	28.2881	27.9942	28.5386	9	9	30.2	30.2	52.964	Adenylosuccinate synthetase, chloroplastic
AT3G18190	Q9LV21	26.9962	27.1866	27.1152	26.9315	26.9909	26.857	27.8504	27.8908	27.8789	27.7502	27.9376	27.8838	26.3672	26.8507	26.4436	16	16	37.3	37.3	57.775	T-complex protein 1 subunit delta
AT5G25460	Q94F20	25.0912	23.1544	23.6997	24.1551	23.4335	24.2324	28.4433	28.4691	28.7861	26.6816	28.3159	28.0688	27.5868	27.6167	27.7473	6	2	20.3	8.9	39.978
AT1G20630	Q96528	27.9379	28.04	27.8195	27.6025	27.9504	28.457	27.141	27.4768	27.3471	26.8335	26.8745	26.4092	26.7095	27.0646	26.5555	21	10	51	29.9	56.761	Catalase-1
AT5G14740	P42737	22.9732	23.0145	23.2449	24.4921	24.2262	23.25	23.4792	23.193	23.6273	23.17	24.0508	23.5499	29.8404	29.6403	29.4251	14	9	63.7	40.2	28.344	Beta carbonic anhydrase 2, chloroplastic;Carbonic anhydrase
AT3G07770	F4JFN3	23.8147	25.7588	26.0799	25.8479	25.9538	26.2917	27.2535	27.667	27.5219	28.1768	28.0523	28.398	26.9528	27.5518	27.5678	16	10	26.4	20.8	90.566
AT3G60730	Q84R10	28.0279	28.3512	28.274	28.0497	28.0075	28.5123	27.8081	27.6714	27.7281	26.3182	26.6349	24.1655	22.897	24.2435	24.0116	11	11	22.9	22.9	57.877	Probable pectinesterase/pectinesterase inhibitor 36;Pectinesterase inhibitor 36;Pectinesterase 36
AT5G20890	Q940P8	26.9913	26.9356	27.4913	26.798	26.9286	27.1619	27.8682	27.4347	27.7675	27.2826	27.6426	27.5525	27.0728	27.4116	27.4422	15	15	53.9	53.9	57.285	T-complex protein 1 subunit beta
AT5G65620	Q94AM1	27.4696	27.2957	27.2539	27.2487	27.328	27.6587	27.5014	27.2661	27.492	27.2374	27.1981	27.3955	27.0192	27.4489	27.5348	17	11	33.2	19.3	88.756	Organellar oligopeptidase A, chloroplastic/mitochondrial
AT3G09440	A0A178VI76	24.6998	24.2852	24.0452	26.1182	24.5042	25.4794	25.1055	26.4326	26.0603	28.4527	28.4683	28.1096	28.1701	28.4605	28.2554	28	9	54.5	16.2	71.147	Heat shock 70 kDa protein 3
AT1G69800	Q9CAR3	27.8436	27.7082	27.7315	28.2122	27.9789	27.765	27.6663	27.7806	27.5681	26.6281	27.05	26.7348	26.8275	24.5299	23.9793	9	9	31.8	31.8	47.817	SNF1-related protein kinase regulatory subunit gamma-1-like
AT3G11130	Q0WNJ6	26.685	26.2762	24.2785	26.7814	27.0446	27.0169	28.0505	28.3666	27.5477	28.2212	27.8796	28.0986	26.2967	25.5053	25.0945	24	4	22.5	4	193.24	Clathrin heavy chain 1
AT4G28750	Q9S831	24.0125	23.8714	24.3006	23.225	23.8472	23.7124	23.4694	23.0354	23.4837	25.4497	25.3718	25.1578	30.3499	27.814	29.1705	5	3	51	36.4	14.967	Photosystem I reaction center subunit IV A, chloroplastic
AT1G70830	Q9SSK9	24.3366	24.4476	23.5648	23.3538	23.426	22.7516	22.5842	24.081	23.5596	27.3846	27.3405	27.46	28.8149	28.9728	28.7691	12	8	78.2	60.6	37.614	MLP-like protein 28
AT3G25860	Q9SQI8	27.5626	27.5888	27.6205	27.4978	27.4453	27.3871	26.9539	26.5512	26.8498	26.9185	26.8125	26.8029	28.133	27.9204	27.4002	10	8	38.5	33.3	50.08	Dihydrolipoyllysine-residue acetyltransferase component 4 of pyruvate dehydrogenase complex, chloroplastic
AT5G10860	Q9LEV3	26.5113	26.7787	26.8225	26.7529	26.7544	27.0544	27.0084	26.8494	27.0845	27.6602	27.6267	27.4937	28.2513	27.8972	27.9641	10	10	64.1	64.1	22.729	CBS domain-containing protein CBSX3, mitochondrial
AT1G35680	P51412	23.5466	23.507	22.9283	24.0388	23.687	24.8437	22.9468	23.5506	22.8045	27.1775	27.3623	27.0965	29.5759	29.3144	28.985	6	6	54.1	54.1	24.038	50S ribosomal protein L21, chloroplastic
AT5G49460	Q9FGX1	27.5911	27.4846	27.496	27.3065	27.5952	27.5193	27.4234	27.162	27.0946	27.3841	27.2528	27.4019	26.9023	27.3807	27.1169	14	2	38.5	7.4	65.827	ATP-citrate synthase beta chain protein 2
AT4G13360	Q9T0K7	27.5847	27.5107	27.6862	27.4994	27.3048	27.5299	27.3494	27.4178	27.5234	27.1458	27.0529	27.2272	26.7665	26.7095	27.1416	9	9	29.2	29.2	46.25	3-hydroxyisobutyryl-CoA hydrolase-like protein 3, mitochondrial
AT1G77940	Q8VZ19	27.0168	27.1984	26.8465	26.7487	26.2971	26.7323	27.1507	27.2832	27.2465	27.9288	27.8512	27.7252	27.4513	27.5615	27.536	5	2	35.7	11.6	12.29	60S ribosomal protein L30-2
AT5G63310	O64903	25.1693	25.687	24.436	23.6985	23.7584	24.3673	25.391	24.7303	25.326	26.9075	27.5951	27.1836	29.2439	29.1786	28.9388	7	7	27.7	27.7	25.55	Nucleoside diphosphate kinase II, chloroplastic
AT1G62740	Q5XEP2	27.1714	26.9003	26.6415	27.0789	27.1029	27.4283	27.2077	26.6686	26.9957	27.2297	27.4366	27.3828	27.9925	28.1302	27.4567	12	10	34.2	29.4	64.519	Hsp70-Hsp90 organizing protein 2
AT3G16190	Q93Z51	28.3463	28.1187	28.1604	28.2776	28.0907	27.9905	26.7389	27.4885	27.5776	25.6318	26.4558	26.5479	25.4316	25.9914	25.4597	7	7	50	50	21.858	Probable inactive nicotinamidase At3g16190
AT5G28060	Q8LC83	25.6135	26.5133	26.4338	24.3634	26.831	24.1717	26.9316	26.2809	26.8276	27.5007	28.1634	27.9738	28.2883	28.3317	28.0957	5	3	31.6	22.6	15.419	40S ribosomal protein S24-2
AT3G02360	Q9FWA3	26.9463	26.8838	27.3259	27.3386	26.9358	26.9242	27.019	27.708	27.3718	27.7834	27.33	27.5256	27.3658	27.3525	27.5434	11	9	29	23	53.577	6-phosphogluconate dehydrogenase, decarboxylating 3
AT1G64190	Q9SH69	26.9787	26.9674	27.1988	27.3552	27.2	27.1465	27.3494	27.6188	27.6041	27.7864	27.4682	27.4842	26.9294	26.8057	27.1172	14	5	42.3	14.8	53.377	6-phosphogluconate dehydrogenase, decarboxylating 1, chloroplastic
AT1G63000	Q9LQ04	24.4105	24.6388	24.993	24.0018	23.8639	25.8078	25.3545	25.4409	25.3713	27.939	28.9313	27.8734	28.3998	28.378	28.501	12	11	61.5	58.8	33.597	Bifunctional dTDP-4-dehydrorhamnose 3,5-epimerase/dTDP-4-dehydrorhamnose reductase
AT1G62000	Q39168	28.6541	28.6247	28.277	27.7641	23.9198	23.4596	23.3825	24.1138	27.3004	24.3366	22.8646	23.49	26.8995	27.0202	26.6792	2	2	13.5	13.5	14.872	UPF0540 protein At1g62000
AT4G39330	P42734	24.406	23.5763	23.6033	23.6748	23.7904	24.2204	23.862	23.9982	24.2056	27.6588	27.7847	27.474	28.9958	29.2549	29.0332	12	12	47.2	47.2	38.933	Probable cinnamyl alcohol dehydrogenase 9
AT5G26360	Q84WV1	27.0067	26.3934	26.8919	26.8061	27.0302	25.9892	27.6181	27.7931	27.3738	27.9411	27.8855	28.0425	26.8644	26.3023	26.7842	12	12	31.5	31.5	60.339	T-complex protein 1 subunit gamma
AT3G63170	Q9M1X2	27.5576	27.4357	27.6852	27.5038	27.8121	27.4301	27.2803	27.2952	27.351	27.0346	26.8333	26.7889	27.148	27.3664	27.1343	8	8	41.6	41.6	30.394	Fatty-acid-binding protein 1
AT5G55240	Q9FLN9	27.4817	27.662	27.8838	28.0354	26.943	27.9515	27.7129	27.8069	28.0753	26.9972	26.7338	26.7129	24.7504	25.2199	25.4332	8	7	49.4	44.4	27.875	Peroxygenase 2
AT1G50380	Q9SX53	27.91	27.7085	27.7638	27.3123	27.6788	27.7144	27.9089	27.6536	27.8007	27.1225	26.9358	27.0172	25.9726	23.825	26.1186	12	12	24.6	24.6	80.938
AT5G59290	Q9FIE8	26.4955	27.1342	26.9363	27.0582	26.9519	27.1853	27.3325	27.0855	26.9707	27.3311	27.6523	27.6203	27.0907	27.5448	27.8915	14	5	57.3	19.3	38.569	UDP-glucuronic acid decarboxylase 3;UDP-glucuronic acid decarboxylase 6
AT4G29410	Q9M0E2	27.0253	27.1341	26.7142	26.8454	26.6037	26.9327	27.4629	27.3675	27.4337	27.5776	26.1934	27.3552	27.8781	27.5631	27.252	5	4	30.1	30.1	15.91	60S ribosomal protein L28-2
AT5G48180	Q93XW5	27.6463	27.638	27.7915	27.293	27.3604	27.6821	27.1795	26.9545	26.9386	27.4392	27.0738	27.5686	27.2483	26.2509	26.3558	8	8	37.1	37.1	35.853	Nitrile-specifier protein 5
AT1G17290	F4I7I0	27.2188	27.4962	27.3311	27.202	27.353	27.1737	27.524	27.6539	27.4604	27.4565	27.1908	27.0646	26.9955	27.1168	27.0825	12	12	41.1	41.1	59.82	Alanine aminotransferase 1, mitochondrial
AT4G12130	Q8L733	27.4817	28.4545	27.9306	28.1553	28.3288	27.6386	27.391	27.5335	27.4317	26.2064	25.423	25.3908	25.0001	25.2521	25.7166	12	12	38.2	38.2	43.527
AT5G23540	Q9LT08	26.1653	25.7404	26.2229	26.1999	24.531	26.241	26.673	27.2027	26.7262	27.3659	27.8354	27.7365	28.2397	28.0717	28.1954	12	12	69.5	69.5	34.353	26S proteasome non-ATPase regulatory subunit 14 homolog
AT5G55070	Q9FLQ4	27.1044	26.8536	27.3191	27.2879	26.6054	26.8533	27.0296	27.284	27.4585	26.9617	27.4482	27.0476	27.8679	27.5975	27.0508	8	8	29.1	29.1	50.133	Dihydrolipoyllysine-residue succinyltransferase component of 2-oxoglutarate dehydrogenase complex 1, mitochondrial;Dihydrolipoyllysine-residue succinyltransferase component of 2-oxoglutarate dehydrogenase complex 2, mitochondrial
AT3G56310	Q8VXZ7	27.3824	27.327	27.236	27.2319	27.4826	27.2542	27.3494	27.4197	27.2065	27.3609	27.1765	26.9362	27.1832	27.2105	27.2361	6	6	18.1	18.1	48.362	Alpha-galactosidase 3
AT5G67500	Q9FJX3	27.2017	27.0432	26.8122	27.1095	26.5222	27.2244	23.8973	26.7483	27.0412	28.4223	27.471	27.1355	28.1727	27.1196	26.8883	10	10	49.6	49.6	29.594	Mitochondrial outer membrane protein porin 2
AT1G23490	Q9LQC8	27.623	27.2009	27.1941	27.3838	27.3607	27.5711	27.4938	27.2946	27.5044	27.5876	26.8051	27.2055	26.3625	26.2657	26.6987	9	9	60.8	60.8	20.592	ADP-ribosylation factor 2-A;ADP-ribosylation factor 2-B;ADP-ribosylation factor 1
AT1G23190	O49299	27.3317	27.2605	27.1335	26.8643	26.9053	26.8053	26.9316	26.9332	26.8642	27.4464	27.317	27.1261	27.7092	27.6935	27.6177	21	13	56.4	40.1	63.17	Probable phosphoglucomutase, cytoplasmic 1
AT1G54010	Q8W4H8	25.0317	25.1584	24.8204	25.4055	25.2387	25.19	26.4707	27.1255	26.7213	25.3656	28.646	28.6204	27.5598	26.7257	28.4204	15	14	53.4	49.2	43.143	Inactive GDSL esterase/lipase-like protein 23
AT2G22230	Q9SIE3	27.7004	27.7778	27.7175	27.6258	27.4483	27.6768	27.3153	27.1297	27.3996	26.6995	26.5201	26.4049	27.0372	26.9552	26.6659	5	3	25.5	19.1	24.242
AT2G19940	Q93Z70	26.9628	27.2253	27.147	27.5779	26.9659	27.1108	27.4938	27.1734	27.2632	26.7792	27.036	27.3342	27.3097	27.389	26.5473	13	13	46.9	46.9	44.135	Probable N-acetyl-gamma-glutamyl-phosphate reductase, chloroplastic
AT4G37550	Q9SZE9	27.6	27.5586	27.5807	27.3072	27.8963	27.3483	27.3992	27.5058	27.5976	27.044	26.6119	26.7824	26.5515	26.3885	26.856	8	8	27.3	27.3	47.566
AT2G43910	Q0WP12	23.4151	24.4176	23.4668	23.5063	24.0857	23.9511	24.0324	23.1181	24.7212	27.6521	28.1775	27.9325	28.8744	28.9019	28.8261	7	7	48.9	48.9	25.288	Thiocyanate methyltransferase 1
AT1G47980	F4HWR0	27.4646	27.52	27.2658	27.7189	27.6225	27.4859	27.4707	27.4898	27.5983	26.795	26.4279	26.7221	25.6094	25.1386	25.5029	8	6	27.6	21.9	34.293
AT4G14800	O24633	27.0515	26.9764	26.9774	27.3025	27.2409	27.0995	27.2625	26.7459	26.9402	27.4906	27.4341	27.3479	27.2286	27.5976	27.0296	6	2	60.3	21.6	21.984	Proteasome subunit beta type-2-B;Proteasome subunit beta type
AT2G14170	A8MQR6	27.4101	27.5021	27.4662	27.5114	27.783	27.1107	27.2625	27.2037	27.4873	26.9446	26.9529	26.8142	26.7327	26.8247	26.9887	9	9	24.7	24.7	53.406	Methylmalonate-semialdehyde dehydrogenase [acylating], mitochondrial
AT5G01410	Q8L940	26.4652	24.1921	26.2518	23.5592	25.8396	25.4589	26.8623	26.9588	26.3398	27.7269	27.9328	27.9163	27.9316	27.8816	28.1819	13	8	70.6	54	33.216	Pyridoxal 5-phosphate synthase subunit PDX1.3
AT4G38810	Q9T0I9	27.5742	27.7715	27.4969	27.5821	27.4858	27.5492	27.3325	27.5116	27.5601	27.1463	26.9867	27.1397	25.069	25.8705	26.1707	7	7	27.2	27.2	41.156
AT5G55480	Q9FJ62	27.1653	27.0464	27.1245	27.8739	27.4698	27.5421	27.2979	27.3593	27.433	27.1554	27.0479	26.6626	26.9251	26.7833	27.1121	15	15	30.8	30.8	84.164	Glycerophosphodiester phosphodiesterase GDPDL4
AT5G64260	Q9FE06	27.8727	27.6895	27.9431	27.6792	27.7357	27.7831	27.3578	27.213	27.5773	26.4236	25.9145	26.843	25.8255	26.7675	25.1526	6	6	22.6	22.6	32.674	Protein EXORDIUM-like 2
AT2G44060	O80576	25.782	26.6099	26.7049	26.5865	25.7111	25.9943	25.7466	26.6366	26.3625	25.8112	28.0017	27.6734	28.1063	28.0674	28.1222	11	11	48.6	48.6	36.036
AT5G66040	Q39129	27.1097	27.1184	27.4857	27.2545	27.5733	26.8204	27.5682	27.1301	27.4856	27.1995	26.4835	26.6641	27.4461	26.9941	27.4325	4	4	86.7	86.7	12.676	Thiosulfate sulfurtransferase 16, chloroplastic
AT1G08200	Q9SGE0	24.1368	24.5246	22.1896	24.2416	23.3279	24.2687	22.6092	24.1572	22.1084	28.0441	28.2381	28.1453	28.5071	28.5326	28.6848	15	4	49.4	16.5	43.79	UDP-D-apiose/UDP-D-xylose synthase 2
AT3G17240	Q9M5K2	26.5962	27.2363	27.2721	27.8183	26.5456	27.3206	27.7645	27.3525	27.9764	26.8305	27.455	27.2624	26.5559	26.1776	26.0438	13	7	37.3	29.6	53.985	Dihydrolipoyl dehydrogenase 2, mitochondrial
AT1G79440	Q9SAK4	27.5981	27.5834	27.4661	27.6362	27.8284	27.418	27.341	27.4141	27.4059	26.036	26.6136	26.8088	26.6812	26.7244	26.6009	12	12	33.7	33.7	56.558	Succinate-semialdehyde dehydrogenase, mitochondrial
AT1G56450	Q7DLR9	26.6638	26.7695	26.7788	26.6706	26.1572	27.015	26.9316	26.5155	26.7763	27.4564	27.1879	27.2292	27.8142	27.8573	27.6867	10	10	53.7	53.7	27.651	Proteasome subunit beta type-4
AT3G27430	F4IWI5	27.084	26.7894	26.6298	26.6169	26.7364	26.9398	26.8019	26.7738	26.9926	27.2508	27.1125	27.1119	28.1106	27.8215	27.4686	6	6	30.3	30.3	28.897	Proteasome subunit beta type;Proteasome subunit beta type-7-A;Proteasome subunit beta type-7-B
AT3G23940	Q9LIR4	27.2834	27.1749	26.9799	26.3234	27.2732	26.8021	26.8504	26.9539	27.0342	27.0826	27.2201	27.1532	27.5723	27.6673	27.5818	7	7	17.7	17.7	64.713	Dihydroxy-acid dehydratase, chloroplastic
AT5G47870	Q9FIJ4	27.7452	27.4673	27.6728	27.7323	27.6682	27.5893	27.0401	26.7939	27.0595	26.6168	26.7158	26.2144	26.9119	26.9036	26.6838	5	5	32.7	32.7	21.409
AT3G11400	Q9SSJ0	26.2859	26.6046	26.6305	26.669	26.4519	26.5819	26.7389	26.7936	26.6	26.7704	27.6923	27.7103	28.1926	27.6941	27.3145	7	7	28.2	28.2	32.714	Eukaryotic translation initiation factor 3 subunit G
AT3G07110	Q9SFU1	25.9167	23.6357	25.6648	23.3346	25.7087	25.4348	27.524	26.7221	27.3331	28.0616	27.9838	28.1616	26.4321	26.8065	27.6883	7	5	32.5	26.2	23.466	60S ribosomal protein L13a-1
AT5G04590	Q9LZ66	27.0466	27.1548	26.2966	26.4709	26.387	27.2374	27.2077	26.4381	26.469	26.9789	27.1967	26.9346	27.9255	27.6628	27.7514	14	14	32.4	32.4	71.949	Sulfite reductase [ferredoxin], chloroplastic
AT5G14450	Q9LY84	25.0177	25.4961	25.2459	25.3487	25.4005	23.8135	27.7453	27.8124	27.6659	27.8945	27.8792	27.7804	27.03	27.4321	27.4916	10	10	35.2	35.2	43.57	GDSL esterase/lipase At5g14450
AT1G62080	O04575	28.5465	28.4366	28.3471	27.3591	27.394	23.8131	27.1312	25.0723	26.8726	23.968	26.334	24.2884	26.6353	23.9487	26.2542	2	2	13.3	13.3	15.113	UPF0540 protein At1g62080
AT5G38160	Q9FF40	27.1457	27.5567	27.4859	27.6575	27.7505	27.606	27.9372	27.9676	28.1289	26.1597	26.1085	26.0052	23.2825	23.7307	24.4677	3	3	38.8	38.8	10.887
AT5G65750	Q9FLH2	27.1215	27.6337	27.1884	27.4225	27.7	27.5026	27.9089	27.7373	27.8718	26.8259	26.5077	26.5726	26.8289	24.5532	23.2161	14	14	26.3	26.3	116.4
AT4G28365	F4JL85	27.3218	27.4444	24.2347	27.3618	27.5633	27.4983	27.3992	27.4841	27.4607	27.1099	27.0735	26.8859	26.7414	27.0567	22.6434	1	1	8.5	8.5	21.602
AT4G34050	O49499	26.9617	25.6856	27.0853	26.9468	25.6135	26.9022	26.7518	26.838	25.641	27.2605	27.2032	27.2013	27.5497	27.8316	28.3244	9	9	49.4	49.4	29.155	Caffeoyl-CoA O-methyltransferase 1
AT2G39990	O04202	26.1797	27.574	26.3697	27.348	27.8157	26.2943	27.3239	26.6407	26.6316	26.7894	26.7991	26.7103	27.3718	27.3776	27.6738	8	8	49.8	49.8	31.862	Eukaryotic translation initiation factor 3 subunit F
AT3G11710	Q9ZPI1	26.421	26.6883	26.6115	26.0352	26.5885	26.0377	27.1312	27.2459	27.0098	27.5867	27.6743	27.3309	27.2989	27.4329	27.3342	13	13	22	22	70.887	Lysine--tRNA ligase
AT2G40660	Q93VB0	26.3771	24.055	24.542	24.3277	26.8018	26.1359	26.317	27.1078	27.0089	27.7441	27.8428	27.7945	27.9438	27.8683	27.7426	11	11	37.8	37.8	42.088
AT5G43060	Q9FMH8	23.7313	23.739	22.3709	24.1804	25.1774	23.9122	23.53	23.767	24.1771	28.0501	27.9367	28.0324	28.4897	28.4302	28.6467	10	8	21	19.7	51.203
AT1G27950	Q9C7F7	23.6654	24.1389	23.4687	23.5766	23.2664	27.5523	23.4026	27.5116	27.5538	27.2592	27.2026	27.0924	27.022	26.6459	23.8107	2	2	10.9	10.9	19.759	Non-specific lipid transfer protein GPI-anchored 1
AT5G05780	O24412	26.4239	26.9132	26.4231	26.5465	26.5838	26.7863	26.6595	27.1273	27.5841	28.0293	27.9634	27.9537	25.851	24.9611	26.687	5	2	27.6	9.4	34.728	26S proteasome non-ATPase regulatory subunit 7 homolog A
AT3G44110	Q94AW8	26.4988	26.4003	26.4461	26.1332	26.66	26.2714	26.8973	26.9942	27.1259	27.9539	27.6926	27.9128	26.7967	26.2545	27.7329	9	7	38.6	32.6	46.444	Chaperone protein dnaJ 3
AT1G12780	Q42605	26.0467	26.6295	26.6403	26.2173	23.9254	26.2896	27.5682	27.0901	27.3299	27.8694	27.4205	27.3416	27.1524	27.4546	27.1111	14	12	54.7	54.7	39.157	Bifunctional UDP-glucose 4-epimerase and UDP-xylose 4-epimerase 1
AT4G19410	F4JT64	26.6446	26.9704	27.327	27.1077	27.182	27.959	27.3153	27.9994	27.7355	26.7755	26.6749	26.5885	26.0343	26.6175	26.0393	10	8	33.1	28.4	55.832	Pectin acetylesterase 7
AT1G23740	Q9ZUC1	23.3184	24.5308	23.0142	23.6992	23.7459	23.0731	24.4713	25.4154	22.8759	25.087	26.6129	26.2843	29.4275	29.1128	28.782	12	12	52.3	52.3	40.986	Quinone oxidoreductase-like protein At1g23740, chloroplastic
AT4G03520	Q9SEU8	26.7195	25.3646	26.8323	25.0015	26.6115	27.6127	26.6181	23.2889	26.539	27.8957	28.0102	27.9706	26.8317	26.6595	26.7889	6	6	40.9	40.9	20.312	Thioredoxin M2, chloroplastic
AT3G08740	Q8VZW6	25.944	23.2403	23.0629	24.5592	22.0632	27.1842	23.3272	25.816	23.2079	26.5881	26.8382	26.6932	28.8732	28.7641	28.6358	5	5	27.1	27.1	26.228
AT5G35360	F4JYE0	26.374	26.5934	26.9131	26.72	26.5016	26.7133	26.4707	26.2438	25.9391	26.9087	26.6002	27.0356	28.0743	27.8768	28.1078	12	12	36.2	36.2	60.77	Biotin carboxylase, chloroplastic
AT3G25920	P25873	23.6752	23.557	23.8784	22.8211	24.2996	23.3978	23.6036	22.9003	23.3318	26.8588	26.9727	26.6501	29.0493	28.8684	28.6385	7	7	30.7	30.7	29.707	50S ribosomal protein L15, chloroplastic
AT2G32060	Q9SKZ3	26.857	27.0517	26.6359	26.555	26.1416	23.594	26.9202	27.0542	27.1195	27.6471	27.5278	27.1292	27.5445	27.6197	27.2539	7	5	42.4	29.9	15.329	40S ribosomal protein S12-2
AT5G52840	Q9FLX7	27.7882	27.0861	27.2153	27.1208	27.1356	27.4014	27.2445	27.1311	27.0862	26.9727	26.3383	27.3683	26.5046	27.2334	25.3951	7	7	61.5	61.5	19.179	Probable NADH dehydrogenase [ubiquinone] 1 alpha subcomplex subunit 5, mitochondrial
AT2G17870	Q94C69	27.989	27.5178	24.7057	23.2285	27.9023	27.1151	23.1963	23.5724	27.0446	26.4786	26.3272	26.6129	22.6678	26.3604	26.4516	3	3	17.9	17.9	29.564	Cold shock domain-containing protein 3
AT3G47800	Q9STT3	26.4133	23.9006	24.3312	23.3446	23.2224	24.6221	26.673	25.2314	26.1451	27.0644	26.9364	27.1943	28.5944	28.6218	28.5187	7	7	33.2	33.2	39.714	Aldose 1-epimerase
AT3G22200	Q94CE5	26.9826	27.0536	27.5137	26.9812	27.2471	27.2352	27.0813	27.0031	27.3114	27.2883	27.2465	27.0991	26.4403	25.8593	27.0292	12	12	50.2	50.2	55.187	Gamma-aminobutyrate transaminase POP2, mitochondrial
AT4G29840	Q9S7B5	25.7821	26.0595	26.2952	26.2672	26.1734	26.1621	27.1115	27.2059	27.1278	27.6634	27.6869	27.6446	26.9884	27.083	27.1532	9	9	28.9	28.9	57.776	Threonine synthase 1, chloroplastic
AT4G24220	Q9STX2	27.1897	27.4435	27.4873	27.1817	27.3956	27.2745	27.8081	27.8301	27.9031	26.5363	25.9968	26.7767	24.9635	24.1192	26.3676	12	12	47.3	47.3	44.102	3-oxo-Delta(4,5)-steroid 5-beta-reductase
AT2G20760	Q9SKU1	24.4407	23.2685	24.3763	22.1109	27.0171	26.6521	27.0505	24.4382	23.4675	27.7605	27.1984	27.8542	28.3652	27.863	27.6666	4	4	11.5	11.5	37.225	Clathrin light chain 1
AT2G23350	O22173	27.4591	27.502	25.8101	28.1592	26.6878	26.9567	26.574	26.521	26.623	26.7004	26.7585	26.5785	26.7653	27.201	27.248	12	11	26.9	25.8	71.652	Polyadenylate-binding protein 4
AT5G50850	Q38799	25.6645	26.1605	26.3239	26.205	26.3201	26.4224	27.217	27.1891	27.1799	27.2903	27.2046	27.2899	27.4865	27.2856	27.4979	8	8	38	38	39.175	Pyruvate dehydrogenase E1 component subunit beta-1, mitochondrial
AT5G47700	Q8LEQ0	26.0719	26.2972	26.6984	26.4635	26.1843	25.9138	26.4661	26.6317	26.7512	27.1371	27.6561	27.0356	27.6041	27.1945	27.1722	5	3	78.8	50.4	11.247	60S acidic ribosomal protein P1-3
AT3G62120	A0A1I9LNS4	23.3376	26.8324	27.1596	28.0301	26.8254	26.7385	27.2979	26.984	26.7137	26.9114	27.1522	27.2749	26.1532	26.364	26.8777	11	11	31.9	31.9	59.173	Class II aaRS and biotin synthetases superfamily protein
AT5G26830	O04630	27.2095	27.067	27.0886	26.7752	26.9045	26.5782	27.189	27.2005	27.3168	27.3901	27.3603	27.26	26.0339	26.2203	26.2075	10	10	25.7	25.7	77.336	Threonine--tRNA ligase, mitochondrial
AT1G27310	Q9FZK4	23.3297	23.6162	23.7974	23.2099	22.7418	22.9289	24.3189	24.4549	22.7424	27.118	27.2254	26.9861	28.8723	28.7538	28.5213	4	4	72.1	72.1	13.527
AT2G27530	P59230	26.0097	23.5882	26.1882	23.2606	26.4437	24.3778	26.7389	26.4947	26.2783	27.9218	27.8329	27.5266	27.5555	27.8173	27.658	4	2	24.5	13.9	24.425	60S ribosomal protein L10a-2
AT2G44310	O64866	26.7345	27.0188	26.984	26.7158	26.572	26.4721	27.1115	26.539	26.8067	27.0558	27.0473	27.0449	27.4382	27.5752	27.2598	4	4	45.1	45.1	15.821
AT5G61170	Q9FNP8	26.9126	26.6074	26.3913	26.3045	24.8466	26.2029	27.0084	26.855	26.5906	28.183	28.2235	28.046	26.1178	26.1226	24.144	10	2	52.4	14.7	15.697	40S ribosomal protein S19-3
AT5G27640	F4K4D5	26.3709	26.9648	25.9394	27.0281	26.3327	26.1266	26.8741	27.224	27.0888	27.2552	27.31	27.305	27.4467	26.7407	26.9173	14	3	25.5	6.4	84.913	Eukaryotic translation initiation factor 3 subunit B
AT4G36760	F4JQH3	26.6123	26.9693	26.6834	26.5086	26.5428	26.9694	27.5754	27.2191	27.3791	27.5458	27.6005	27.4076	24.5325	25.7472	26.2131	9	9	21.7	21.7	71.992
AT5G64100	Q96511	23.8975	24.5346	23.8321	23.8801	23.4654	24.2467	24.2375	24.1371	23.6121	27.9475	28.0201	27.7449	28.4529	28.4434	28.3471	9	9	33.8	33.8	35.678	Peroxidase 69
AT3G23570	Q94JY3	26.9588	27.1585	26.8197	27.2637	27.1556	26.9453	27.1795	27.4158	27.0408	27.0255	26.8783	26.7179	25.9208	26.3216	26.1729	6	6	42.3	42.3	26.53
AT5G44340	P24636	26.5756	27.0867	26.759	26.8219	26.8051	26.0419	26.3545	26.9388	26.6395	27.0664	27.1298	27.2901	26.9649	27.1067	26.8186	24	4	66	13.5	49.823	Tubulin beta-4 chain
AT3G48870	F4JF64	23.2105	23.4718	24.5344	23.9427	22.899	22.9231	23.6106	21.3508	25.6703	27.696	28.0453	27.5143	28.4523	28.5067	28.3024	40	11	49.3	15.2	102.24	Chaperone protein ClpC2, chloroplastic
AT1G48630	Q9C4Z6	23.4512	24.0804	22.8417	23.781	23.8266	23.9836	26.8741	26.6591	26.8949	27.9387	27.9369	27.9459	27.9675	27.3298	27.4307	14	4	54.9	21.5	35.8	Receptor for activated C kinase 1B
AT2G29450	P46421	27.2303	27.3992	27.2753	27.7167	27.7361	27.5973	27.1214	27.1822	27.0754	26.3153	26.6171	27.111	24.2399	23.5406	24.7934	9	9	58.9	58.9	26	Glutathione S-transferase U5
AT5G23740	P42733	23.0127	22.6692	24.4025	25.9637	22.6549	24.7461	26.1527	26.6216	26.3292	28.2082	27.457	27.7293	27.5797	27.5144	27.964	5	2	32.7	17.6	17.749	40S ribosomal protein S11-3
AT2G43090	Q9ZW85	24.4425	23.3183	23.681	24.272	24.5417	24.3305	25.7796	26.3412	25.6766	27.4218	26.9871	26.9533	28.6436	28.6941	28.3519	9	8	45.8	40.6	26.79	3-isopropylmalate dehydratase small subunit 3
AT2G02930	Q9SLM6	27.1209	26.6468	27.1083	27.1892	27.1989	27.1455	27.3066	27.3862	27.4365	26.9304	26.3191	26.7265	26.3658	26.515	26.2257	15	7	80.7	48.1	24.12	Glutathione S-transferase F3
AT1G78060	Q9SGZ5	24.0594	25.5876	24.5414	24.5171	25.3035	23.6151	26.2207	26.169	26.1834	27.9744	27.6582	27.4549	27.627	27.9419	28.211	12	12	25.2	25.2	83.891	Probable beta-D-xylosidase 7
AT3G24830	Q9LRX8	26.2996	26.3143	26.2419	26.0177	26.0501	25.5425	26.6595	26.8029	27.1212	27.748	27.4876	27.3904	26.821	26.8773	27.2832	6	3	25.7	15.5	23.459	60S ribosomal protein L13a-2
AT3G51160	P93031	25.0561	23.6607	23.1184	23.8921	24.2313	23.6193	27.6527	23.0492	22.3537	27.4376	27.5092	27.4911	28.44	28.3242	28.2208	9	8	33	26	41.961	GDP-mannose 4,6 dehydratase 2
AT2G33845	Q8RYC3	26.4965	23.1347	23.2781	26.6583	22.8933	24.4106	26.726	24.2142	26.6301	27.4833	26.7048	27.4215	27.5856	27.8342	27.4541	4	4	37.9	37.9	20.122
AT5G26667	O04905	25.0042	23.2256	24.5476	24.0721	23.2557	23.17	25.5105	25.3025	25.2995	26.9502	27.8932	27.3581	28.5245	27.7157	28.771	7	7	46	46	22.481	UMP-CMP kinase 3
AT4G32520	Q94JQ3	26.1129	22.6312	26.2546	22.4511	26.5466	26.1448	27.0401	27.0002	27.1712	27.6953	27.5562	27.5615	26.6659	26.8584	26.8714	12	12	36.5	36.5	57.982	Serine hydroxymethyltransferase 3, chloroplastic
AT3G03960	Q94K05	24.0569	25.4326	25.2886	25.4919	25.3903	24.3685	27.0401	27.6031	27.5275	27.7959	28.0094	27.9979	26.8237	26.3089	26.3357	11	11	34.6	34.6	58.939	T-complex protein 1 subunit theta
AT2G37760	O80944	27.0956	27.1765	27.4481	27.5746	26.2211	27.4495	27.3494	26.9895	27.0741	26.3465	24.5127	26.441	26.5114	27.0396	26.7172	8	8	40.8	40.8	34.684	Aldo-keto reductase family 4 member C8
AT4G38630	P55034	25.9416	25.8313	25.8573	25.9181	25.7831	26.2337	25.3712	26.3025	26.5764	27.4392	27.3724	27.4383	27.6977	27.8616	27.7424	7	7	20.2	20.2	40.757	26S proteasome non-ATPase regulatory subunit 4 homolog
AT3G58750	Q9LXS6	24.3054	23.1674	26.5049	23.6466	23.3919	24.0954	26.6458	26.683	24.6057	27.5116	27.9578	27.5878	26.9717	26.9562	27.3802	10	5	22.8	13	56.602	Citrate synthase 2, peroxisomal
AT1G27450	F4HSX1	25.5071	26.1028	26.1925	26.2307	26.1176	26.0792	26.4923	26.1161	25.6828	26.938	27.1313	27.2899	27.6993	27.5646	27.3511	5	5	25.7	25.7	30.988	Adenine phosphoribosyltransferase 1, chloroplastic
AT1G53310	Q9MAH0	27.1127	26.8825	27.416	26.7677	26.8333	26.9506	26.8858	27.0124	26.8758	27.2483	26.9343	27.1314	25.6675	25.7447	26.4471	13	9	18.2	13.9	110.28	Phosphoenolpyruvate carboxylase 1;Phosphoenolpyruvate carboxylase 3
AT1G51710	Q949Y0	27.6781	26.7093	27.0394	27.1983	26.5332	27.4237	26.8623	26.8191	26.6077	26.9476	26.9922	26.7256	26.3185	25.9326	26.2157	9	7	23.2	18.3	53.695	Ubiquitin carboxyl-terminal hydrolase 6;Ubiquitin carboxyl-terminal hydrolase
AT1G04690	O23016	27.6562	26.493	26.5399	26.5828	26.2253	28.8662	25.8504	26.6944	26.4978	26.2847	26.1935	26.6003	26.5566	26.9566	26.673	5	5	27.4	27.4	36.538	Probable voltage-gated potassium channel subunit beta
AT2G18040	Q9SL42	24.4242	23.4648	24.0444	23.8456	24.6482	23.8162	25.0567	23.6641	23.88	26.2696	26.5304	26.5053	28.8217	28.8071	28.4102	5	5	42.9	42.9	13.015	Peptidyl-prolyl cis-trans isomerase Pin1
AT1G31180	Q9SA14	25.8242	26.5919	26.2414	27.1512	26.478	26.7667	26.4457	26.3798	26.1787	26.6772	27.0056	26.8485	27.4321	27.6458	27.4267	10	6	35.9	21	43.847	3-isopropylmalate dehydrogenase 1, chloroplastic
AT5G10540	Q949P2	27.1988	27.5499	27.3039	26.6499	27.5269	27.1238	27.2445	26.7852	27.2465	26.5044	26.7718	26.7836	25.3293	24.8679	25.7539	17	11	44.5	28.8	79.043	Probable cytosolic oligopeptidase A
AT2G35490	O82291	25.1372	25.3055	24.707	26.4551	26.2388	26.6523	25.6998	25.7858	25.8861	26.9235	26.9274	26.9389	28.351	28.1091	27.8142	7	7	25.3	25.3	40.505	Probable plastid-lipid-associated protein 3, chloroplastic
AT5G20080	P83291	26.463	26.5269	26.7823	26.5659	26.4081	26.4429	26.3943	26.5277	26.129	27.1931	27.1083	26.7918	27.7098	27.4967	26.9721	6	6	23.5	23.5	35.987	NADH-cytochrome b5 reductase-like protein
AT2G28790	Q9ZV34	27.0626	26.9457	26.3752	27.3142	27.2382	26.9783	26.6998	27.5489	27.1326	27.1188	27.1703	26.8544	25.5346	26.5283	23.325	5	5	35.7	35.7	27.017
AT5G09510	Q9FY64	26.0706	24.4955	25.759	23.5769	24.3504	23.4426	25.1214	25.9842	26.6847	26.9378	26.8473	27.2513	28.2385	28.1611	28.356	5	3	49.3	20.4	17.072	40S ribosomal protein S15-4;40S ribosomal protein S15-1
AT3G52380	Q39061	23.5885	24.3452	25.034	23.9186	24.1813	24.803	23.7909	24.6737	23.1992	26.4496	27.3679	28.0149	28.5823	28.5614	28.5868	8	8	33.7	33.7	35.744	RNA-binding protein CP33, chloroplastic
AT3G01910	Q9S850	27.0275	27.3916	27.3446	27.1451	26.9168	27.1752	26.9539	26.6637	26.7915	26.8987	26.6592	26.2079	26.4393	27.1986	25.7338	9	9	34.9	34.9	43.329	Sulfite oxidase
AT5G45390	Q94B60	25.527	23.5811	25.9225	25.3962	24.8812	25.228	26.3811	25.1106	25.4261	26.2812	27.1109	26.8101	28.5304	28.4211	27.7224	9	9	53.4	53.4	31.498	ATP-dependent Clp protease proteolytic subunit 4, chloroplastic
AT5G35630	Q43127	23.7641	23.9008	24.024	24.5285	24.1588	24.6409	23.985	23.0419	23.3109	20.8929	23.271	23.3251	29.2446	29.1145	28.9331	16	15	51.2	47.9	47.41	Glutamine synthetase, chloroplastic/mitochondrial
AT1G53280	Q9MAH3	27.0629	26.9345	27.4054	26.929	26.9094	26.7435	27.3239	27.4124	27.4895	26.5473	26.5442	26.7883	26.6234	25.5513	25.645	5	5	25.6	25.6	46.99	Protein DJ-1 homolog B
AT1G41830	F4I7X1	27.5497	27.4382	27.214	27.1122	27.5514	27.1728	27.524	27.1079	27.2604	25.7951	25.9587	26.3035	23.7793	25.3311	25.5172	6	2	14.2	5.4	60.577
AT3G14990	Q9FPF0	27.2246	26.9245	26.0629	28.0266	27.2662	28.3542	26.3066	26.9644	26.2981	26.3152	26.2041	25.582	26.5564	26.1331	25.5006	7	7	31.1	31.1	41.857	Protein DJ-1 homolog A
AT3G54050	P25851	25.4561	25.9203	25.6918	25.6145	25.8359	25.4508	25.1908	25.2132	25.5165	23.9458	25.9172	26.5985	28.5272	28.6064	28.3783	6	6	23.3	23.3	45.161	Fructose-1,6-bisphosphatase, chloroplastic
AT2G05840	O81147	26.9709	23.063	23.4561	24.2452	22.6934	23.9873	24.2908	27.1641	23.4817	27.2625	27.2044	27.3947	27.9465	23.7969	27.8536	11	5	58.5	36.2	27.35	Proteasome subunit alpha type-6-B
AT5G63400	O82514	26.3462	26.661	26.2353	23.9897	24.5302	26.4522	26.8504	27.4387	26.4576	27.0324	26.7081	27.5858	27.1334	26.6524	27.0711	7	6	40.2	36.6	26.932	Adenylate kinase 4
AT3G20050	P28769	26.454	23.0334	26.9639	26.8629	26.2378	26.9216	26.726	26.6947	26.4086	27.0346	26.9157	26.9233	27.0436	26.6461	26.8285	13	13	30.5	30.5	59.229	T-complex protein 1 subunit alpha
AT3G59920	O24653	24.6811	25.6947	25.6311	25.605	23.6081	23.2625	25.8647	26.1216	25.979	27.6625	27.451	27.7735	27.4615	27.7423	27.6421	10	6	42.6	27.7	49.538	Guanosine nucleotide diphosphate dissociation inhibitor 2
AT1G09200	P59226	22.9281	23.2893	23.098	24.336	23.0821	23.8613	22.4487	23.892	23.5889	27.7211	27.3951	27.3634	28.4672	28.3818	28.1945	3	1	36.8	23.5	15.268	Histone H3.2;Histone H3-like 5
AT2G33210	F4IVR2	24.2428	23.243	26.4285	23.5719	23.3	24.505	26.6458	26.2659	26.7255	27.681	27.6557	27.8841	27.2476	27.1309	27.1209	23	12	55	35.9	61.477	Chaperonin CPN60-like 1, mitochondrial
AT3G04790	Q9S726	26.9278	26.8771	27.3572	27.2974	27.2386	26.9409	25.8576	25.1194	25.2848	25.8093	26.0347	25.6557	27.4605	27.7685	26.9734	6	6	33.7	33.7	29.305	Probable ribose-5-phosphate isomerase 3, chloroplastic
AT4G05390	Q9M0V6	24.3029	23.3559	24.8453	27.1523	24.3596	23.5722	27.2077	27.1649	27.6682	27.0632	27.1432	26.9007	27.4919	27.4099	27.434	8	8	31	31	42.396	Ferredoxin--NADP reductase, root isozyme 1, chloroplastic;Ferredoxin--NADP reductase, root isozyme 2, chloroplastic
AT3G13930	Q8RWN9	22.3487	25.098	23.2094	23.4096	24.698	26.2733	26.3662	26.5881	26.9031	27.4312	27.6316	27.4559	27.7937	27.8639	27.541	14	14	38.4	38.4	58.467	Dihydrolipoyllysine-residue acetyltransferase component 2 of pyruvate dehydrogenase complex, mitochondrial
AT1G09750	O04496	26.1548	26.271	22.5106	26.9485	26.4304	25.7172	23.4002	25.4631	25.708	25.4546	26.8037	25.9695	28.1926	28.4162	27.8111	4	4	7.1	7.1	47.661
AT3G48690	Q9SMN0	25.4069	24.7618	27.5297	25.1257	24.3777	26.7622	24.4416	26.5077	26.2664	27.6053	27.6246	27.1018	27.1463	27.2184	27.1642	7	6	34.3	30.2	35.567	Probable carboxylesterase 12
AT3G44320	P46010	22.7451	24.3355	23.4338	23.8307	23.9306	24.1034	23.7237	24.7942	22.591	26.7619	27.4591	27.8687	27.5084	27.6652	26.929	6	4	22.8	14.7	38.022	Nitrilase 3
AT1G41880	Q9FZH0	25.1556	23.8507	24.4725	25.8234	23.3024	24.118	23.2399	24.2668	22.8529	27.3425	27.5122	26.866	27.8342	27.7375	27.7711	4	1	38.7	22.5	12.799	60S ribosomal protein L35a-2
AT5G03300	Q9LZG0	26.6663	26.7412	26.446	26.6875	26.5074	26.5461	26.4723	26.8775	26.2887	26.56	27.1942	26.6858	26.9943	27.2462	26.9207	16	5	57.4	24.3	37.846	Adenosine kinase 2
AT3G57020	Q9M1J6	27.5654	27.409	27.4045	27.6879	26.9708	27.118	27.141	27.0688	27.2431	27.0091	24.2819	26.4445	25.0256	24.7739	23.4654	8	8	41.4	41.4	41.457	Protein STRICTOSIDINE SYNTHASE-LIKE 9
AT2G32730	O48844	27.0133	26.908	26.8679	26.7172	26.8706	24.2567	27.0505	27.118	27.0822	27.1969	27.0458	26.7908	25.569	25.7678	25.9528	5	5	6.9	6.9	108.98	26S proteasome non-ATPase regulatory subunit 1 homolog A;26S proteasome non-ATPase regulatory subunit 1 homolog B
AT4G17870	O49686	24.0938	24.433	24.1102	24.0872	23.5649	23.9608	26.8504	26.2901	26.5295	27.7307	27.5423	27.436	27.5796	27.62	27.9322	5	5	44	44	21.575	Abscisic acid receptor PYR1
AT5G56680	Q9SW96	25.6645	26.1083	26.1774	26.1993	26.2828	23.3666	27.341	26.5247	27.0322	27.5932	27.415	27.5253	26.3842	26.1743	26.6075	9	9	22.9	22.9	63.782	Asparagine--tRNA ligase, cytoplasmic 1
AT2G24940	Q9SK39	26.4636	26.3859	26.4444	26.5657	26.6278	26.3262	26.2996	24.9467	26.0392	26.8743	26.8234	26.567	27.6594	27.646	26.0092	5	5	78	78	11.031	Probable steroid-binding protein 3
AT5G13120	Q9ASS6	26.391	22.0861	25.9132	22.5189	26.5595	23.8815	26.228	26.1478	25.2882	26.7802	26.8448	26.9196	27.8674	27.7925	27.7679	3	3	15.3	15.3	27.879	Photosynthetic NDH subunit of lumenal location 5, chloroplastic
AT2G35370	P25855	23.8315	24.4913	24.4407	24.2715	24.199	24.1129	24.07	23.0602	23.4862	25.4258	25.8545	25.2659	28.8463	28.8937	28.8201	4	2	30.3	22.4	17.947	Glycine cleavage system H protein 1, mitochondrial
AT1G01100	Q8LCW9	24.1419	24.0934	23.6356	23.3881	23.8087	23.4381	28.1507	23.6914	23.8215	26.6771	27.5818	27.5447	27.1185	27.1478	27.1287	5	3	78.6	50	11.162	60S acidic ribosomal protein P1-1
AT5G66190	Q9FKW6	26.1142	26.3723	26.3619	26.8377	26.7343	27.2149	26.1623	26.3382	26.3691	26.4996	26.4447	26.385	26.6098	27.7824	27.4417	10	9	39.2	36.1	40.326	Ferredoxin--NADP reductase, leaf isozyme 1, chloroplastic
AT3G16950	A8MS68	27.7804	27.6233	27.2897	27.1986	27.2921	27.0496	26.0526	27.2297	26.8899	26.3045	26.668	25.7322	22.9388	23.0877	25.3857	14	6	37.7	17.7	60.756	Dihydrolipoyl dehydrogenase 1, chloroplastic
AT2G21250	F4IGK5	27.1031	26.8592	27.2671	26.9712	26.7556	27.0046	26.3562	26.901	27.0118	26.607	26.7945	26.8413	26.5291	25.2565	26.1028	8	5	42.4	26.9	26.457
AT3G29360	Q9LIA8	24.6354	23.7835	23.8432	23.2409	25.4906	24.1791	25.0233	23.1364	23.5542	27.9353	27.7417	27.8672	27.6508	27.8937	27.9676	11	5	34.4	18.8	53.172	UDP-glucose 6-dehydrogenase 2
ATCG00790	P56793	24.1045	24.4778	23.0238	24.8519	23.1152	24.4507	24.8373	23.449	24.3566	26.1145	26.057	25.8387	29.0272	28.8265	28.4065	4	4	42.2	42.2	15.294	50S ribosomal protein L16, chloroplastic
AT1G69410	Q9C505	27.0701	27.0791	27.4371	26.8173	27.3878	27.5828	27.217	26.8363	27.0987	26.3725	25.889	26.0802	23.7815	25.6618	26.186	4	2	31	13.9	17.207	Eukaryotic translation initiation factor 5A-3;Eukaryotic translation initiation factor 5A-1
AT5G54500	Q9LSQ5	24.7289	25.2275	25.6126	24.9339	22.7962	25.1903	25.1135	24.0424	25.2662	26.9895	26.9365	26.7802	28.3023	28.3247	28.1	6	6	42.6	42.6	21.796	NAD(P)H dehydrogenase (quinone) FQR1
AT5G54160	Q9FK25	24.2241	23.6101	24.6008	23.7226	23.9217	23.226	24.6236	23.9104	24.3305	26.8903	26.9246	26.6316	27.7381	29.0835	28.3551	15	15	56.2	56.2	39.618	Flavone 3-O-methyltransferase 1
AT2G38540	Q42589	23.712	24.8832	22.7138	23.4185	24.1398	24.0687	23.3295	23.602	23.6772	26.2484	26.0685	23.7546	28.744	28.792	28.7752	3	3	22.9	22.9	11.755	Non-specific lipid-transfer protein 1
AT5G15650	Q9LFW1	26.9747	27.1356	26.578	26.5553	27.2554	27.2474	26.4785	26.4529	26.495	26.8797	26.8277	26.4108	25.587	25.7775	25.8521	18	7	69.2	39.7	40.89	UDP-arabinopyranose mutase 2
AT4G36910	O23193	23.6801	27.0646	24.1355	24.0308	23.0028	25.2754	27.611	27.3961	24.6475	26.7769	27.1057	26.9558	27.9839	27.2395	26.9164	11	11	52.5	52.5	25.768	CBS domain-containing protein CBSX1, chloroplastic
AT5G42740	P34795	27.1437	26.9764	27.1662	27.1624	26.9649	27.0257	27.0084	27.214	27.1162	26.6682	26.9775	26.7595	24.0883	23.5174	24.9764	9	9	28.9	28.9	61.717	Glucose-6-phosphate isomerase, cytosolic
AT5G06290	Q9C5R8	24.071	23.7842	24.5256	24.4419	26.6218	26.774	21.9263	23.9449	22.749	24.1626	24.0248	23.6139	28.7638	28.5787	28.4476	11	3	51.3	20.5	29.78	2-Cys peroxiredoxin BAS1-like, chloroplastic
AT4G25370	Q93WL3	24.5503	24.2453	23.1274	23.4324	23.4718	24.7076	23.4681	23.7284	23.5539	26.8647	26.729	26.9218	28.6123	28.6149	28.4024	6	6	37	37	26.05
AT3G26060	A0A1I9LR27	26.7772	26.303	26.6944	26.8757	27.023	26.4623	24.2551	26.5453	26.5246	26.8948	27.0851	26.616	26.7607	26.9825	26.8631	8	8	65.6	65.6	17.028	Peroxiredoxin Q, chloroplastic
AT1G24510	O04450	26.4889	26.5752	26.7722	26.9993	26.8505	26.6202	27.5014	27.7195	27.4859	24.8201	26.2099	26.9773	24.1389	24.746	24.7071	8	8	25.6	25.6	59.384	T-complex protein 1 subunit epsilon
AT5G05010	Q93Y22	26.4105	26.3792	26.2457	25.9266	26.5474	26.4631	26.7129	26.7172	26.5087	26.9493	26.8618	26.9437	27.1611	26.7376	26.7914	11	11	28.1	28.1	57.718	Coatomer subunit delta
AT1G79850	P16180	22.7256	24.0961	23.2652	23.6556	23.312	23.2093	23.5647	23.7936	23.6478	26.9411	26.8947	23.6326	28.8217	28.5868	28.1838	4	4	32.9	32.9	16.282	30S ribosomal protein S17, chloroplastic
AT5G22650	Q56WH4	27.6223	27.7212	27.6152	22.8031	24.3929	22.8878	24.7251	23.8898	26.685	27.5033	27.2403	27.4673	25.8885	25.6031	26.4323	3	3	21	21	32.218	Histone deacetylase HDT2
AT4G09650	Q9SSS9	24.506	24.4588	23.6791	24.5465	22.7311	23.7917	23.9435	23.3077	24.316	26.097	26.171	24.8371	29.0542	28.5338	28.5434	11	11	56	56	25.668	ATP synthase subunit delta, chloroplastic
AT5G28500	Q9LKR8	23.3661	24.3668	23.6002	23.9977	24.3651	23.9242	23.8075	24.0609	26.3258	28.0338	27.9019	28.6996	27.7212	26.8975	26.7699	8	8	31.8	31.8	48.236	Rubisco accumulation factor 1, chloroplastic
AT3G50820	Q9S841	24.2017	23.8919	23.573	23.135	22.974	24.1558	23.026	23.5351	24.1401	22.511	22.85	24.7865	29.2092	28.9025	28.7553	16	5	60.7	31.1	35.019	Oxygen-evolving enhancer protein 1-2, chloroplastic
AT3G19170	Q9LJL3	23.7993	26.8374	26.5656	23.5727	26.773	23.5818	23.989	26.6242	26.7709	27.3717	27.2017	27.2075	25.113	26.979	26.8223	14	14	16.5	16.5	121.01	Presequence protease 1, chloroplastic/mitochondrial
AT2G17190	Q9SII9	24.0686	23.4398	26.3507	26.3761	24.6012	26.3845	24.2402	26.3693	26.6144	26.7372	27.0233	26.4508	27.526	27.6807	27.4592	7	4	22.7	13.9	57.285	Ubiquitin domain-containing protein DSK2a
AT4G34555	Q8GYL5	24.4055	25.0359	23.9346	24.1977	23.7115	22.7651	24.344	24.1769	22.9045	27.42	27.4176	27.2253	27.0944	27.5457	27.5833	5	0	38	0	12.018	40S ribosomal protein S25-3
AT2G30110	P93028	26.5709	27.3059	26.9246	26.4836	26.8538	26.8554	26.533	26.4985	26.5771	26.8556	26.6606	26.968	25.9869	26.0958	26.2388	13	11	21.7	17.8	120.25	Ubiquitin-activating enzyme E1 1
AT2G26080	O80988	26.6856	23.1177	24.072	23.9879	24.5357	24.1822	26.6865	26.7537	26.7859	27.341	27.4386	27.3339	27.0562	27.0225	27.3876	11	4	16.8	6.7	113.77	Glycine dehydrogenase (decarboxylating) 2, mitochondrial
AT3G59970	Q9SE60	25.1223	23.4443	24.987	24.9523	25.9635	24.1703	25.4202	23.4584	25.8896	27.0151	26.9337	27.0256	28.1957	27.8679	27.832	13	9	35.6	30.1	66.288	Methylenetetrahydrofolate reductase 1
AT2G19760	Q42449	23.5785	26.7482	24.567	25.7437	24.2678	26.8341	23.9606	23.8878	25.948	26.5672	26.508	26.5561	28.1898	27.8963	27.6239	9	9	90.8	90.8	14.266	Profilin-1
AT4G29350	Q42418	25.1139	25.2327	24.3559	26.1138	25.2141	25.3432	25.8264	23.9909	25.8464	26.4799	26.1831	26.4296	27.5925	27.5201	27.2898	5	5	51.9	51.9	13.998	Profilin-2
AT4G05530	Q9S9W2	25.902	26.338	24.21	25.2111	26.4656	26.2589	26.228	25.951	26.0762	26.5992	26.9777	26.792	27.3782	27.5301	27.4821	7	7	36.6	36.6	26.765	Short-chain dehydrogenase/reductase SDRA
AT3G52990	Q94KE3	26.8472	26.4972	26.8309	26.8412	26.5938	27.0165	26.8385	26.9843	26.7493	26.159	26.8451	26.8704	25.5979	25.5828	26.4586	10	2	28.1	6.5	57.495	Pyruvate kinase
AT3G27160	Q9LI88	22.7253	24.0632	25.0665	23.3164	23.7493	23.452	23.6654	22.3738	24.6239	24.1093	26.4611	26.4439	28.7342	28.4318	28.5576	2	2	16.9	16.9	20.911
AT2G18110	Q9SI20	25.6144	23.7765	23.4296	25.4999	28.3255	25.7657	25.9428	24.0531	23.1573	26.7807	27.0146	27.0405	26.605	27.0508	27.3701	11	5	45.5	32	25.266	Elongation factor 1-delta 2
AT1G17650	F4I907	24.2858	23.2737	26.6565	24.3696	24.3231	24.2428	23.5688	23.8142	22.7076	27.0232	27.1244	27.0607	28.1892	27.8647	28.2639	8	8	34.6	34.6	37.781	Glyoxylate/succinic semialdehyde reductase 2, chloroplastic
AT1G64520	Q9SGW3	26.7075	26.5422	26.1577	26.6118	26.294	26.1634	26.3256	27.0937	26.7217	26.7762	26.6738	26.6604	26.6116	26.4292	26.5896	10	10	57.7	57.7	30.706	26S proteasome non-ATPase regulatory subunit 8 homolog A
AT5G16840	Q9LFD5	26.8159	26.8411	26.8576	26.4401	26.7295	26.6988	23.5771	26.7081	26.8221	26.7922	26.2973	26.4772	27.393	27.0499	24.041	7	7	45.5	45.5	27.019	Binding partner of ACD11 1
AT4G17530	Q9SEH3	26.2259	26.5754	26.1461	27.2302	26.8182	26.7058	26.4598	26.4186	26.5187	26.4512	26.462	26.6482	26.9659	26.4886	26.5271	7	6	57.9	52.5	22.318	Ras-related protein RABD2c;Ras-related protein RABD2b
AT1G15340	Q9XI36	26.7425	27.0592	26.7787	26.9702	26.7452	26.9022	26.632	26.8373	26.3561	26.5785	26.7268	26.2642	26.2874	25.9566	26.1832	5	5	18.5	18.5	42.357	Methyl-CpG-binding domain-containing protein 10
AT5G58710	Q9SP02	26.4577	27.4824	27.5259	25.5971	26.4812	25.9964	25.5638	25.6189	26.128	26.8813	26.1645	26.6562	26.0802	26.9664	26.3887	4	3	19.1	14.2	21.961	Peptidyl-prolyl cis-trans isomerase CYP20-1
AT4G26110	B3H684	24.3391	24.1454	21.8983	23.6463	24.3924	23.5521	26.7389	26.6447	26.8688	27.4876	27.4261	27.2919	27.7662	27.0538	27.2544	9	9	36.2	36.2	41.607	Nucleosome assembly protein 1;1
AT5G16710	Q8LE52	26.8528	26.5806	26.7095	26.8728	26.5637	26.9361	26.5898	26.748	26.8955	26.1611	26.5057	26.0455	25.1953	25.376	26.8805	9	9	38	38	28.514	Glutathione S-transferase DHAR3, chloroplastic
AT1G79530	Q9SAJ6	23.7334	24.6289	22.9084	24.403	23.579	23.6518	26.5135	26.6834	26.1755	26.7549	27.048	27.259	27.4357	27.9742	27.8586	13	8	47.2	28.7	44.83	Glyceraldehyde-3-phosphate dehydrogenase GAPCP1, chloroplastic
AT5G62530	Q8VZC3	26.2572	26.0985	27.1799	27.5636	26.7814	26.5632	27.2354	26.8159	26.9312	27.1418	26.176	25.5733	25.5509	25.7482	25.0074	10	10	27.2	27.2	61.772	Delta-1-pyrroline-5-carboxylate dehydrogenase 12A1, mitochondrial
AT5G43330	P57106	23.2586	25.7779	26.2697	24.5051	24.533	26.1003	25.9694	25.9082	24.7276	27.3998	26.6707	27.2468	26.682	27.8753	27.8437	12	4	45.2	20.5	35.675	Malate dehydrogenase, cytoplasmic 2
AT3G56150	O49160	23.9919	25.9835	26.1827	26.0079	26.0034	25.8295	27.0296	27.2971	26.9913	27.3342	27.198	27.5001	25.6611	24.4376	25.6509	11	11	16.8	16.8	102.95	Eukaryotic translation initiation factor 3 subunit C
AT2G21330	F4IGL5	24.4793	24.4366	24.2395	23.0977	22.7995	23.5481	24.3651	24.0973	23.5255	24.2505	25.6398	27.3671	28.5838	28.4938	27.5635	17	9	47.6	32.9	41.807	Fructose-bisphosphate aldolase;Probable fructose-bisphosphate aldolase 1, chloroplastic
AT5G48300	P55228	26.219	25.45	26.3947	25.8968	26.1257	26.606	25.8764	26.3854	25.8476	26.3931	26.2981	26.2534	27.4533	27.3147	27.4313	12	12	31.3	31.3	56.65	Glucose-1-phosphate adenylyltransferase small subunit, chloroplastic
AT5G12040	Q8RUF8	26.4632	26.6909	26.6065	26.2072	26.7376	26.2956	26.5711	26.5218	27.4355	25.4947	26.5323	26.2159	26.5935	26.7081	26.448	9	9	34.1	34.1	40.33	Omega-amidase,chloroplastic
AT4G36880	Q94B08	23.2045	23.7629	24.7198	24.3928	23.9245	24.4814	27.6181	23.7556	23.5384	27.6477	27.8057	27.6061	26.6283	27.2129	27.172	7	7	22.6	22.6	41.639	Germination-specific cysteine protease 1
AT3G02530	Q9M888	25.411	25.6586	25.8379	25.5565	26.4781	25.9216	26.4831	26.3105	26.7487	27.3684	27.1794	26.9207	26.0639	26.7334	26.4969	5	1	12.7	3.2	58.949	T-complex protein 1 subunit zeta 1
AT1G48920	Q9FVQ1	26.9187	26.7149	25.8731	23.3634	23.4794	23.4678	26.3844	25.2896	24.8462	27.4032	27.3572	27.5886	26.7807	26.2984	26.8742	7	7	19.4	19.4	58.773	Nucleolin 1
AT3G54660	P42770	26.8021	26.8062	26.6889	27.0255	26.5759	26.1944	26.1871	26.5948	26.8635	26.1558	26.2265	25.132	26.6803	26.9544	26.4957	6	6	19.1	19.1	60.852	Glutathione reductase, chloroplastic
AT2G47510	P93033	22.6144	23.382	23.2063	23.6419	23.7805	24.4513	26.7518	26.3059	23.9905	27.4518	27.3668	27.3898	27.1473	27.5841	27.7143	10	10	31.1	31.1	52.999	Fumarate hydratase 1, mitochondrial;Fumarate hydratase 2, chloroplastic
AT5G63810	Q9FN08	23.1887	24.4201	23.1126	23.9962	25.1736	22.8961	22.7931	23.9654	23.6758	27.3307	27.5036	27.1997	28.0936	28.0123	27.7783	12	12	22.4	22.4	83.101	Beta-galactosidase 10
AT3G59760	B9DFR6	23.3215	23.7881	23.3316	24.5421	23.5874	23.8995	24.9933	23.3156	23.5793	23.9431	26.4049	26.5603	28.4514	28.3642	28.3778	11	8	35.8	30	46.115	Cysteine synthase;Cysteine synthase, mitochondrial
AT1G12840	Q9SDS7	26.4549	26.0203	25.9114	26.3631	25.8776	26.2059	26.7518	26.0977	26.7781	27.3527	26.9003	27.009	25.264	26.2952	26.7257	9	9	37.9	37.9	42.619	V-type proton ATPase subunit C
AT2G24580	Q9SJA7	27.0323	27.1314	27.3421	27.0043	26.9581	26.7492	26.3877	26.3731	26.7515	26.418	25.4443	25.9436	25.8662	25.9459	25.9073	5	5	18.8	18.8	45.701	Probable sarcosine oxidase
AT1G53750	Q9SSB5	26.1145	24.4153	26.4692	26.3792	26.5023	26.1649	26.6181	26.6047	27.1601	27.1636	27.0686	26.826	26.3009	26.2309	25.1979	8	8	30	30	47.803	26S protease regulatory subunit 7 homolog A
AT2G32520	O80889	26.3236	24.4726	26.5807	23.065	26.5445	26.469	26.391	26.7199	23.1698	26.9277	27.1692	26.9947	26.9103	26.6562	26.869	5	5	30.1	30.1	25.921
AT3G15090	Q9LK96	26.5005	26.6946	26.8379	24.144	27.0145	26.7515	26.7389	26.8694	26.4806	26.8035	26.3968	26.1329	25.8407	26.5222	26.4113	8	8	32.2	32.2	39.394
AT4G03200	F4JI64	27.3266	27.4572	27.0186	27.1449	27.0765	26.9437	26.8973	26.7837	26.8075	26.1358	26.0382	25.8533	22.2085	25.231	24.0029	5	5	7.9	7.9	76.845
AT4G12910	Q8L7B2	24.0959	25.5347	24.2661	24.2475	23.8316	23.1461	23.7245	26.4935	25.9098	27.4394	27.563	27.4089	27.8212	27.4212	27.487	5	5	11.3	11.3	55.832	Serine carboxypeptidase-like 20
AT2G35040	O64767	23.9507	22.4707	23.1334	26.1581	23.8302	24.405	26.7771	26.7869	26.4817	27.0803	27.153	26.8928	27.0579	27.341	27.3848	9	9	32.1	32.1	59.471
AT5G54760	Q9FFV1	25.5401	25.6581	25.437	23.0997	22.9922	23.1399	23.7272	23.6631	23.8698	26.6316	26.5306	26.2419	28.047	27.9264	27.5735	4	1	65.5	29.2	12.62
AT1G21720	Q9XI05	26.5774	26.693	26.1923	26.4709	26.876	26.7329	26.5374	26.0651	26.3884	26.4318	26.5425	26.4457	26.225	26.4426	26.3593	7	2	44.6	23.5	22.839	Proteasome subunit beta type-3-A
AT3G54470	Q42586	25.3946	26.1853	26.1483	26.521	23.8342	25.8262	27.2262	26.7819	27.198	27.0885	26.7115	26.9437	25.4812	25.8067	26.0483	8	8	33.8	33.8	51.85	Uridine 5-monophosphate synthase;Orotate phosphoribosyltransferase;Orotidine 5-phosphate decarboxylase
ATCG00780	P56792	24.7021	23.3405	23.1684	23.6423	23.2422	24.0461	24.6156	23.073	23.8562	26.7383	26.7806	26.5223	28.4368	28.5428	27.8968	7	7	55.7	55.7	13.582	50S ribosomal protein L14, chloroplastic
AT5G40770	O04331	24.5112	24.0818	24.1683	26.5972	23.8991	23.1539	24.4145	26.6656	22.6086	28.0892	26.5247	26.7762	27.9288	26.804	26.6272	8	7	42.2	38.6	30.399	Prohibitin-3, mitochondrial;Prohibitin-4, mitochondrial
AT1G66410	P0DH96	24.5515	24.5006	23.7266	23.8948	24.599	25.3951	25.2996	22.2072	23.5306	26.3321	26.9998	27.0467	27.0987	29.2016	26.863	7	2	70.5	45	16.862	Calmodulin-4;Calmodulin-1
AT5G02050	Q9LZM6	23.3768	24.0652	25.2285	24.2562	25.348	23.9696	26.3205	26.6353	26.4	27.1223	27.214	27.1876	26.8468	27.1296	27.1833	5	5	15.4	15.4	29.763
AT1G53580	Q9C8L4	23.8981	24.4058	23.5435	23.4099	23.5077	24.201	26.0254	26.0984	26.0419	26.8868	27.4802	27.5031	27.618	27.47	27.3391	7	7	35	35	32.332	Persulfide dioxygenase ETHE1 homolog, mitochondrial
AT1G54270	P41377	24.2609	25.8229	26.0992	26.047	26.0001	25.705	26.5754	26.8516	26.2464	26.8463	26.6306	26.8388	26.6499	26.8336	26.724	26	6	81.3	23.3	46.762	Eukaryotic initiation factor 4A-2
ATCG00830	P56791	23.511	23.4809	23.9254	24.1851	24.0076	24.6307	24.0292	23.007	24.3523	26.6409	26.4918	26.4148	28.2088	28.1195	28.0574	6	6	34.7	34.7	29.864	50S ribosomal protein L2, chloroplastic
AT1G12310	Q94AZ4	24.0587	23.5315	24.1977	24.1547	23.4133	22.8445	23.8894	24.3209	23.7956	26.87	26.6359	26.8779	28.2674	28.2423	27.9751	8	4	67.6	43.2	16.517	Probable calcium-binding protein CML13
AT2G20890	Q9SKT0	24.1566	25.9251	25.568	26.5184	25.5986	24.3934	26.0732	24.4999	23.6961	26.3133	27.3164	26.4042	27.3878	27.9684	27.8599	8	8	35.3	35.3	33.795	Protein THYLAKOID FORMATION 1, chloroplastic
AT1G74920	Q9S795	25.8051	26.0696	26.4474	26.9768	26.5626	24.6433	26.1871	26.4106	23.7057	26.6866	26.4737	26.7093	26.622	26.9007	27.0755	13	13	45.3	45.3	54.431	Betaine aldehyde dehydrogenase 1, chloroplastic
AT3G53890	Q9M337	23.3951	22.6339	23.4324	22.894	24.1245	23.5355	23.6895	23.7084	26.0894	26.7747	26.9897	26.8858	27.3911	27.4317	27.1799	5	2	78	19.5	9.0741	40S ribosomal protein S21-1
AT5G03290	Q945K7	25.6304	25.5843	23.8746	26.1014	25.7652	25.8281	26.1604	26.2004	26.476	27.1073	26.7793	26.9861	26.6171	26.554	26.4698	7	7	31	31	40.624	Isocitrate dehydrogenase [NAD] catalytic subunit 5, mitochondrial
AT5G57870	Q93ZT6	25.7026	25.8597	25.5972	25.4699	26.0964	26.2544	26.5374	26.6521	26.7897	26.9568	26.8658	26.7725	26.4871	26.542	26.1392	13	13	23.2	23.2	85.571	Eukaryotic translation initiation factor isoform 4G-1
AT5G26280	Q93Z83	24.0487	23.5237	23.1649	23.1716	23.1408	23.8378	24.1076	23.3652	22.2018	27.8205	27.5852	27.5939	27.6172	27.6926	27.8564	9	7	43.1	35.7	39.445
AT5G17380	Q9LF46	26.4507	26.9385	26.9949	26.5838	26.5904	26.6999	27.2354	27.3233	27.0742	26.2562	23.9254	26.5999	23.4748	24.2352	24.2074	8	8	21.2	21.2	61.47	2-hydroxyacyl-CoA lyase
AT1G18100	Q9XFK7	26.6863	28.0463	26.9234	26.8832	26.8142	26.7264	26.3745	25.1121	26.1058	25.9613	25.7925	25.6638	25.6511	25.4418	25.5872	6	6	57.2	57.2	19.134	Protein MOTHER of FT and TF 1
AT5G24490	Q94K97	24.6283	25.5007	24.7176	23.4746	22.5671	23.2002	23.3898	23.4079	24.6361	27.3083	27.2396	27.2567	28.0299	28.0066	26.9721	4	4	22.7	22.7	34.856
AT2G39390	O80626	24.2804	24.2714	24.7271	24.7014	24.5339	24.4371	22.5601	25.373	23.417	27.2885	27.0671	27.033	27.7169	27.51	27.4025	5	1	33.3	8.9	14.231	60S ribosomal protein L35-2
AT3G56490	Q8GUN2	23.0183	23.2868	24.1123	21.7209	25.3367	25.9655	25.7569	26.0993	25.8414	26.4445	26.7175	26.7725	27.678	27.5945	27.5899	5	5	54.4	54.4	16
AT4G21280	Q9XFT3	23.3235	24.8629	23.234	24.018	24.9728	23.9227	24.6507	22.9511	23.0176	23.9303	24.1598	23.6408	28.9167	28.852	28.3245	10	10	38.1	38.1	23.795	Oxygen-evolving enhancer protein 3-1, chloroplastic
AT3G15640	A8MRD7	26.0906	25.6515	26.922	26.6563	26.0566	27.1475	24.768	25.6854	25.8821	26.5559	26.7133	26.298	26.7505	26.849	26.4808	4	3	54.3	41.7	19.316	Cytochrome c oxidase subunit 5b-1, mitochondrial
AT1G20440	P31168	23.9361	24.631	24.1649	23.2779	24.1993	23.4943	24.0513	23.2847	23.9789	26.7344	23.4508	26.5189	28.429	28.3488	28.1689	6	5	49.8	46.8	29.896	Dehydrin COR47
AT1G66270	Q9C525	24.9125	23.3769	24.4386	23.4109	23.2581	24.3005	23.9304	23.4342	24.5361	27.3441	27.4858	27.3131	27.6718	27.7033	27.7677	15	7	41.6	27.3	59.663	Beta-glucosidase 21
AT3G06720	Q96321	26.5259	26.6226	26.6561	26.7213	26.268	26.3568	26.673	26.8997	26.7645	26.6956	25.8782	25.2827	26.3111	26.1224	26.2757	7	5	25.8	21.1	58.644	Importin subunit alpha-1
AT5G63140	Q9FMK9	27.6484	27.3042	27.0151	26.8998	24.3504	27.2597	23.8359	24.5714	22.7065	27.3191	23.8382	24.0597	26.9671	23.4129	27.1383	3	3	14.4	14.4	43.547	Probable inactive purple acid phosphatase 29
AT5G14320	P42732	24.6107	23.7188	23.2968	23.4487	23.9068	23.485	25.0143	23.43	25.0983	26.5441	26.5647	26.0755	28.6148	28.2547	28.11	5	5	34.9	34.9	19.096	30S ribosomal protein S13, chloroplastic
AT5G24400	Q84WW2	26.4847	26.326	26.6253	26.6566	26.7666	26.4177	24.0055	26.1379	26.0205	26.1757	25.7699	25.9492	26.7259	26.9579	26.7009	7	7	28.6	28.6	35.644	Probable 6-phosphogluconolactonase 5, chloroplastic
AT1G74100	Q9C9D0	24.0191	23.0356	23.3164	22.8114	24.0508	24.3372	22.6393	26.6212	23.7469	27.5181	27.5825	27.5892	26.9993	27.3626	27.3535	10	10	45	45	39.219	Cytosolic sulfotransferase 16
AT3G62730	Q9LZJ2	23.9411	27.4241	27.2926	27.2482	27.1645	27.356	27.2262	27.0598	27.1062	24.765	24.2854	24.9133	25.3528	26.3483	23.2357	4	2	12.9	7.3	34.731
AT3G13460	F4JDC2	23.8804	23.2558	23.4935	23.8802	23.7266	24.0566	26.7771	26.3943	26.2297	27.5942	27.2179	27.5074	26.9764	26.7944	26.975	8	8	21.4	21.4	72.196
AT5G50370	Q9FK35	26.2619	26.459	26.0615	26.5117	26.5545	23.825	26.3393	26.2041	26.4793	26.4028	26.4731	26.3272	26.8956	26.6132	26.4196	6	5	41.5	37.9	27.335	Adenylate kinase 3
AT1G56330	Q01474	25.7894	26.0409	26.0261	25.9922	25.7801	26.0064	26.5374	26.4818	26.48	26.6155	26.5006	26.4453	26.666	26.5717	26.8062	5	5	40.9	40.9	21.986	GTP-binding protein SAR1B;GTP-binding protein SAR1A
AT4G34670	Q42262	25.0872	23.5767	24.3508	23.0616	24.4084	24.1906	26.7645	27.207	27.0782	27.236	27.1322	27.0789	26.2036	26.7882	26.5352	13	6	44.3	30.2	29.803	40S ribosomal protein S3a-2
AT1G48350	Q9SX68	24.7915	24.7601	23.9621	24.6403	25.0679	24.4437	24.7597	25.4215	22.8506	26.4916	26.8628	27.331	28.2717	28.1295	27.7952	5	5	27.6	27.6	18.726	50S ribosomal protein L18, chloroplastic
AT5G08570	Q9FNN1	26.3912	26.4183	26.4232	26.3271	26.569	26.0332	26.4105	26.359	26.0371	26.4134	26.3832	26.6471	26.3728	26.0039	26.1292	7	3	27.6	14.3	54.976	Pyruvate kinase
AT5G42020	Q39043	27.2628	27.3694	26.6816	27.0949	27.5999	27.2633	25.9271	25.0459	24.7109	24.3697	24.7311	25.0402	25.6438	24.7262	25.7851	30	4	43.3	5.8	73.56	Mediator of RNA polymerase II transcription subunit 37f
AT5G58250	Q9LVM3	23.0973	24.1994	24.1276	23.4997	22.968	24.2762	23.004	24.3164	25.2599	27.0231	26.4516	26.7755	27.8771	28.2042	28.0522	8	8	42.7	42.7	24.104
AT1G18800	Q8LC68	25.0132	23.7183	24.4256	23.0292	24.7859	23.5818	26.8264	26.9427	26.2567	27.0311	26.9534	26.9268	27.2652	27.1131	26.9014	6	4	39.6	25.5	29.354	NAP1-related protein 2
AT5G07440	Q38946	26.2069	26.1402	26.1512	26.2515	26.5021	26.3844	26.3205	26.0744	26.6092	26.7917	26.5833	26.4573	25.3957	26.0021	26.399	9	5	33.6	20	44.699	Glutamate dehydrogenase 2
AT3G23490	A0A1I9LTP8	26.9617	25.6207	26.4475	26.622	26.5172	27.5198	25.7441	25.2995	26.3849	25.5733	25.1256	25.3952	26.5591	26.0994	26.8755	6	6	50.7	50.7	15.599	Cyanate hydratase
AT3G07390	Q94BT2	26.1449	26.1619	26.2821	26.6396	25.9337	26.5557	24.4986	23.3899	26.2797	26.3536	25.9442	26.072	25.0994	27.4784	27.1797	3	3	11.1	11.1	25.591	Auxin-induced in root cultures protein 12
AT1G50480	Q9SPK5	23.4266	24.1573	26.1087	26.4599	24.4897	24.0688	26.7645	26.3399	26.2599	27.0005	26.995	27.0419	26.028	26.8224	26.7288	14	14	38.2	38.2	67.801	Formate--tetrahydrofolate ligase
AT4G13430	Q94AR8	24.4548	23.3985	23.6216	24.8036	25.7855	23.5538	26.604	26.6471	26.4684	27.349	27.6289	26.7737	26.7008	26.8089	26.1997	12	12	34.6	34.6	55.013	3-isopropylmalate dehydratase large subunit
AT5G43600	Q8VXY9	26.1203	25.5862	26.141	25.4407	26.1462	28.1444	24.7182	24.9757	26.1712	25.0452	24.9535	27.5799	25.4623	25.7373	26.5013	7	7	24.2	24.2	51.486	Ureidoglycolate hydrolase
AT2G38040	Q9LD43	23.8653	23.5146	22.2479	24.826	23.2263	22.8254	24.6095	23.67	23.6517	26.7734	26.678	26.6096	27.896	28.2811	27.9904	11	11	22.4	22.4	85.305	Acetyl-coenzyme A carboxylase carboxyl transferase subunit alpha, chloroplastic
AT3G54940	Q8VYS0	27.4657	27.4002	26.9619	26.3909	27.4289	26.6927	26.4089	26.4355	26.5713	23.4162	24.6244	26.0959	23.6962	22.7765	23.7294	5	5	21.8	21.8	40.132
AT3G09350	Q84J81	26.1871	24.8206	26.4414	26.3934	26.745	26.5509	26.2077	26.111	26.4624	26.2741	26.0365	26.4047	26.2626	26.1905	26.1306	8	8	33.1	33.1	40.395
ATCG01060	P62090	24.8755	24.4986	24.0373	23.661	23.8658	23.6689	24.2696	24.3304	23.1122	23.7889	26.6618	23.8321	28.1994	28.6707	27.9346	5	5	64.2	64.2	9.0384	Photosystem I iron-sulfur center
AT1G79870	Q9CA90	26.7975	26.2689	26.4712	26.5234	26.633	26.1891	26.4314	26.165	26.3053	26.2884	25.999	26.4892	25.7487	25.8194	25.3936	5	5	35.5	35.5	34.161	Glyoxylate/hydroxypyruvate reductase A HPR2
AT3G17210	A0A178VKB6	25.8116	25.9591	26.0984	24.2131	26.1971	25.896	23.7062	23.5416	26.2346	26.4088	26.235	26.4491	26.7571	27.4084	27.3829	3	3	55	55	12.184	Probable protein Pop3
AT3G14420	Q9LRR9	24.1548	23.5036	22.721	24.2962	24.7973	23.5237	23.8889	23.1997	24.2767	25.1572	25.5314	25.6254	28.3918	28.3571	28.1863	21	8	67.8	21.8	40.341	Peroxisomal (S)-2-hydroxy-acid oxidase GLO1
AT3G16110	Q66GQ3	26.3422	26.112	26.1607	26.3043	26.0339	26.0405	26.1946	26.4331	26.2938	26.452	26.0663	26.1816	26.2072	26.322	26.0837	7	7	18.7	18.7	59.57	Protein disulfide isomerase-like 1-6
AT5G51110	F4KBV0	24.3404	23.7847	23.7579	22.7809	23.5887	24.9518	23.9184	23.0162	23.7525	26.8113	26.7647	26.6454	28.141	27.9784	27.8048	4	4	41.5	41.5	20.908
AT2G25970	O82762	25.8425	25.8945	25.9309	26.0565	24.4044	25.9585	25.9847	23.2273	23.1178	26.4373	26.406	26.3639	27.0379	27.679	26.7884	4	4	11.2	11.2	64.606
AT3G28940	Q9MBH2	26.1657	25.9495	26.0645	26.2747	26.2014	23.6706	25.6376	23.4092	25.7875	25.9022	25.8883	25.8928	27.4324	27.2509	27.0126	3	3	31.4	31.4	19.465
AT4G25100	P21276	26.5119	26.6633	26.992	26.7935	26.6398	26.6163	26.2661	26.2846	26.2024	26.3509	26.2852	26.3891	24.3659	24.7049	23.2415	3	3	35.4	35.4	23.791	Superoxide dismutase [Fe] 1, chloroplastic;Superoxide dismutase
AT1G75270	Q9FRL8	24.0519	23.274	24.1662	22.9273	24.0167	24.2908	26.1449	23.973	22.5474	27.0722	27.035	27.1005	27.2717	27.7909	27.4338	11	11	66.7	66.7	23.407	Glutathione S-transferase DHAR2
AT4G34620	O65686	23.8135	24.0631	23.1603	23.3021	23.1049	22.3701	24.6234	24.0051	23.4528	25.9573	26.6476	26.852	28.2698	28.0342	27.9043	4	4	63.7	63.7	12.699
AT3G44300	P32962	26.637	26.6221	26.9235	26.6377	26.7094	25.5893	26.4923	26.485	23.8465	25.6217	25.7891	26.4448	26.3808	23.9342	26.4124	11	5	45.1	26	37.153	Nitrilase 2
AT5G13510	Q9FY50	22.5073	24.5585	22.9451	24.3447	24.2729	22.0065	23.7291	23.4732	23.6024	27.0248	26.5306	27.0103	27.6241	27.9721	28.1793	5	5	36.4	36.4	24.736	50S ribosomal protein L10, chloroplastic
AT1G02560	Q9S834	26.9477	26.5892	26.7848	24.0955	23.7869	26.6565	27.8445	25.9212	26.8285	25.0011	25.069	25.1878	23.871	25.0141	23.852	5	5	23.5	23.5	32.356	ATP-dependent Clp protease proteolytic subunit 5, chloroplastic
AT1G34430	Q9C8P0	26.6495	24.599	24.2563	26.3939	26.7589	27.0262	26.7518	23.816	23.4298	26.5846	26.5697	23.9051	26.8933	27.4002	26.5426	8	6	27.3	21.9	48.306	Dihydrolipoyllysine-residue acetyltransferase component 5 of pyruvate dehydrogenase complex, chloroplastic
AT1G22450	Q9S7L9	24.4121	24.8128	23.3258	23.2108	23.2536	23.6525	23.0494	23.3892	23.2887	26.8754	27.0968	27.013	27.887	27.3741	27.2781	6	6	55	55	21.195	Cytochrome c oxidase subunit 6b-1
AT2G30050	O64740	24.271	25.0543	23.2199	24.2785	23.286	26.013	23.8832	26.158	26.3668	26.9736	27.0528	26.9213	26.7492	26.9545	27.1627	11	9	49	43	32.642	Protein transport protein SEC13 homolog B
AT4G01310	O04603	24.4802	24.2611	25.0476	24.5119	24.5458	22.386	24.1002	24.0216	23.6375	26.346	26.1812	26.2199	28.2241	28.2131	27.9269	8	8	32.1	32.1	28.343	50S ribosomal protein L5, chloroplastic
AT2G34470	F4IHW4	23.5551	24.1565	25.3194	25.2159	25.4135	24.9941	25.4645	24.9481	25.1832	26.5664	26.7424	26.8034	27.2776	27.3522	26.759	6	6	40.9	40.9	30.225	Urease accessory protein G
AT4G02360	O81297	26.2678	27.2652	26.4804	23.6203	26.01	26.9917	24.4768	24.8927	26.5133	24.2141	26.0355	26.3831	26.0554	25.8626	25.9075	3	3	22.1	22.1	16.7
AT3G53110	Q93ZG7	24.1822	24.9454	26.8138	26.4769	24.2285	26.5492	24.3263	23.0253	26.2487	26.9505	26.7524	26.6137	26.2894	26.2182	26.2842	6	6	21.8	21.8	55.383	DEAD-box ATP-dependent RNA helicase 38
AT4G36020	O65639	23.4618	26.0881	26.0116	25.9456	22.5382	23.9222	26.1965	25.9595	24.5967	26.3444	26.3341	26.3136	26.7433	26.8196	27.5802	4	4	26.1	26.1	30.087	Cold shock protein 1
AT5G63860	Q9FN03	26.7225	26.5653	26.2096	26.3222	26.9475	26.3625	26.3645	26.3468	26.1191	25.9816	25.912	25.6363	26.321	26.1404	24.6667	5	5	15	15	47.118	Ultraviolet-B receptor UVR8
AT4G22240	O49629	23.4494	26.4343	24.5289	26.6477	26.7156	26.7384	26.3545	23.7293	26.3135	26.0434	25.9472	26.4037	26.5071	25.7335	26.1325	5	4	23.5	18.7	33.655	Probable plastid-lipid-associated protein 2, chloroplastic
AT1G49600	F4I3B3	23.5397	24.3979	23.8571	23.9599	24.1899	23.1092	23.0144	24.548	23.6949	27.0427	26.939	27.1299	26.9005	26.7945	26.6726	8	6	27.9	25.4	48.483	Polyadenylate-binding protein RBP47A
AT3G49470	Q94JX9	23.9277	23.6389	23.08	23.2992	25.3531	23.0826	23.3852	25.5736	25.2743	26.4043	26.329	26.4095	27.9376	27.7771	27.6379	6	5	38.2	32.3	23.712	Nascent polypeptide-associated complex subunit alpha-like protein 2
AT5G66170	Q9FKW8	23.4849	24.1775	23.8145	23.9882	26.1196	26.5483	22.9833	26.3907	26.5855	26.3876	26.7021	26.3031	26.8889	27.0951	26.8298	6	6	77.9	77.9	14.882	Thiosulfate sulfurtransferase 18
AT2G34040	F4IGU7	26.1432	26.4001	25.935	26.3117	26.0568	26.3757	26.3031	26.1787	26.4646	26.0199	26.088	26.3848	25.7894	25.887	25.7921	7	7	26	26	50.049
AT5G63800	Q9FFN4	28.0283	27.7982	27.7388	26.4183	26.3863	25.9165	26.4089	23.1116	26.6443	23.4046	24.0595	23.9372	24.3367	23.5597	24.2807	7	7	14.3	14.3	79.758	Beta-galactosidase 6
AT1G09620	F4I116	26.4763	26.4449	26.4558	26.6907	26.3544	26.5166	26.3975	26.1908	26.3746	25.1075	26.8643	25.7468	24.1912	25.2408	24.7346	11	11	20.4	20.4	123.45
AT1G07660	P59259	22.6676	24.5986	23.9388	24.4746	24.0992	24.0224	24.4391	23.6632	23.5773	25.4131	27.8269	27.3892	27.8923	27.4041	26.8503	7	7	54.4	54.4	11.409	Histone H4
AT3G18490	Q9LS40	23.7806	23.5524	23.478	22.4298	22.7929	26.8592	27.6389	28.0433	27.0939	25.6622	25.4591	26.2308	25.1871	26.0333	25.4495	5	5	17.8	17.8	53.233	Protein ASPARTIC PROTEASE IN GUARD CELL 1
AT3G25530	Q9LSV0	24.1795	25.2936	24.2672	26.2723	25.7304	23.4231	25.2678	22.7702	26.191	26.6765	26.7439	26.5789	27.1108	27.4795	27.188	10	10	54	54	30.691	Glyoxylate/succinic semialdehyde reductase 1
AT1G74970	Q9XJ27	24.6208	24.4615	23.9617	23.9537	23.5766	24.058	23.6081	24.1183	23.9107	27.8218	26.0917	27.6577	27.6366	27.5287	27.4157	3	3	21.2	21.2	22.577	30S ribosomal protein S9, chloroplastic
AT3G12203	A0A1I9LS92	27.1706	26.9486	26.928	26.1514	27.1596	27.2736	26.5725	26.2518	26.9443	23.6568	24.2274	23.8912	23.0222	24.0917	23.3662	9	9	40.4	40.4	46.942	Serine carboxypeptidase-like 17
AT1G09130	F4HZE0	25.175	24.4571	24.4947	23.8865	24.6203	22.9745	24.8764	24.8965	24.833	25.5948	26.424	25.6826	27.7364	27.906	27.7838	4	4	17.3	17.3	40.919	ATP-dependent Clp protease proteolytic subunit;ATP-dependent Clp protease proteolytic subunit-related protein 3, chloroplastic
AT3G02730	Q9XFH8	24.9345	22.5765	23.5544	24.1581	23.3132	21.8983	24.1083	24.1707	24.6186	25.1141	24.9616	25.2218	28.1337	28.0913	28.1519	3	3	20.8	20.8	19.325	Thioredoxin F1, chloroplastic
AT2G32920	O48773	26.6682	25.9981	25.5586	25.9232	26.0667	26.8478	26.1075	23.7916	25.657	24.1836	27.1532	27.4639	26.2657	22.5776	24.1615	7	7	24.8	24.8	47.754	Protein disulfide-isomerase 2-3
AT5G35620	O04663	23.8393	23.0998	24.3209	24.4774	24.7095	24.265	22.5114	23.2469	26.1061	26.6561	26.1735	26.6352	27.6601	27.4417	27.7016	6	6	41.9	41.9	22.514	Eukaryotic translation initiation factor isoform 4E
AT4G27520	Q9T076	25.7642	24.82	26.4984	26.5969	26.0401	26.3104	26.1371	25.6059	25.8588	25.8737	25.5982	25.4605	26.8249	27.0333	26.4209	5	5	19.8	19.8	35.064	Early nodulin-like protein 2
AT5G63980	Q42546	23.4641	23.6759	23.6989	22.8051	23.8625	24.6727	22.6013	23.3967	23.8827	27.8966	27.7662	27.5283	26.2071	27.0331	26.2228	9	9	45.9	45.9	37.564	SAL1 phosphatase
AT2G39310	O80950	23.5481	25.0766	24.6961	23.2056	24.7921	24.379	22.7691	24.7383	23.6101	25.5621	25.2511	24.9115	28.1966	28.16	28.3846	12	12	50.2	50.2	50.462	Jacalin-related lectin 22
AT5G54810	P14671	25.9581	23.9592	25.7053	23.2232	25.8714	23.7025	23.0122	26.0519	23.6417	27.2828	27.0344	27.2082	24.4266	26.6362	26.8141	8	8	33.6	33.6	50.925	Tryptophan synthase beta chain 1, chloroplastic
AT5G47030	Q96252	24.677	23.9636	26.9526	24.1222	24.9072	23.5295	26.2856	25.5352	23.9467	26.3277	26.0933	26.6768	27.4594	27.3116	26.9222	4	4	32	32	21.547	ATP synthase subunit delta, mitochondrial
AT4G23100	P46309	25.9434	24.1999	24.203	24.5133	27.0228	22.6345	26.0995	26.3062	25.8928	26.4803	25.7514	26.2012	26.9039	26.1897	26.6642	11	11	30.8	30.8	58.562	Glutamate--cysteine ligase, chloroplastic
AT1G10590	Q93W05	22.9111	23.208	23.8509	23.5896	23.2418	23.4349	24.9089	24.9102	24.5929	24.5259	25.4489	25.2747	28.2736	28.0202	27.7958	3	3	21.6	21.6	15.455
AT5G60160	Q9LST0	26.3517	26.1136	26.5283	26.2263	26.3761	26.2645	26.1312	25.7342	26.4467	26.0838	26.0861	25.9086	25.6652	25.5887	25.6063	6	6	21.6	21.6	52.425
AT4G09040	A8MS54	22.9956	24.1626	23.9536	22.9676	25.1676	22.6491	23.3282	22.3819	23.1121	26.101	26.9356	26.0257	28.0037	28.0638	27.8328	5	5	34.4	34.4	27.703
AT2G35120	O82179	23.3414	23.8757	26.6199	26.1815	26.2972	26.0037	26.9202	26.2808	22.697	26.3985	26.3428	25.2602	26.3099	25.9041	25.8907	4	4	53.8	53.8	17.1	Glycine cleavage system H protein 2, mitochondrial
AT5G23820	Q9FF98	24.5907	22.9386	23.72	23.877	25.1786	24.4265	23.8976	24.0754	24.2916	25.4673	26.5161	26.3369	27.924	28.1909	27.8811	3	3	13.4	13.4	17.907
AT3G05190	A0A178VG19	26.3	25.8798	26.4458	26.0915	26.4053	26.6461	26.0464	25.8438	26.3478	26.5212	26.1497	25.6122	25.6267	24.9484	25.8749	8	5	19.8	11.9	62.212	Branched-chain-amino-acid aminotransferase-like protein 1
AT1G64510	Q8VY91	23.6325	21.6261	24.0473	23.4134	22.719	23.4823	24.8615	23.9605	23.7316	26.3035	25.784	22.999	28.521	28.0913	27.6878	5	5	35.3	35.3	22.761	30S ribosomal protein S6 alpha, chloroplastic
AT5G47930	Q8L953	22.8746	23.7482	24.0342	23.7985	24.1733	23.7952	23.7663	23.4039	23.6427	27.3025	27.3452	27.5076	23.5137	23.1162	24.2356	4	2	46.4	29.8	9.49	40S ribosomal protein S27-3
AT1G51510	F4I9J7	24.2282	23.1901	23.2999	23.1156	24.2037	23.291	24.8577	22.72	23.1899	26.6064	26.3109	26.5494	27.9937	27.7554	27.6	5	5	34.2	34.2	22.438
AT1G32200	Q43307	23.6935	23.5902	22.9522	22.0652	23.1598	23.9462	24.2524	24.5926	24.4232	26.9327	27.0889	27.1278	27.5417	27.644	27.6122	11	11	49	49	50.421	Glycerol-3-phosphate acyltransferase, chloroplastic
AT5G20920	Q41969	26.8104	26.2233	23.5857	22.8969	26.2241	25.8448	26.1604	26.6688	22.649	26.108	26.5333	26.463	26.4369	26.0517	25.4945	9	9	62.3	62.3	30.663	Eukaryotic translation initiation factor 2 subunit beta
AT2G26740	Q42566	25.9989	26.2432	26.4768	26.3359	26.3845	26.4582	26.4378	26.6134	26.4374	26.0906	25.8547	25.8296	25.3266	24.4012	23.8833	4	4	16.2	16.2	36.423
AT4G20980	P56820	26.3814	26.5275	25.7945	26.0296	22.2225	26.3527	26.5536	26.6935	26.2295	24.6204	25.5492	27.2277	25.0931	25.4144	24.8804	9	2	22.5	5.4	66.724	Eukaryotic translation initiation factor 3 subunit D
AT5G46230	Q9FL37	26.7996	26.6702	25.9933	26.4641	27.2033	26.4967	25.5463	26.1072	26.058	24.0347	25.8845	23.7515	25.7815	25.9914	22.8552	5	5	32.9	32.9	16.172
AT2G04780	Q9SJ81	24.231	24.6704	23.0495	23.2985	23.8173	23.5368	23.2959	23.4561	24.332	23.5492	25.42	25.6033	28.299	28.2829	27.0705	2	2	10.6	10.6	26.845	Fasciclin-like arabinogalactan protein 7
AT1G71950	Q9C8W7	23.4627	25.028	23.2917	26.3066	24.3838	26.5304	23.732	24.8309	23.806	23.3225	26.2994	26.5551	26.9706	26.6891	26.8141	3	3	26.5	26.5	14.852
AT1G07040	Q9LMJ7	26.5342	26.4031	26.6367	26.8022	26.6172	25.64	26.2821	26.1451	25.8214	26.374	25.9169	25.7434	24.884	25.4449	22.9673	4	4	14.8	14.8	40.637
AT3G10410	P32826	26.8931	26.0307	22.8631	24.124	25.9064	24.4249	25.8019	22.736	23.7442	24.5243	23.6775	25.5779	26.129	26.2695	26.1907	7	7	19.4	19.4	57.301	Serine carboxypeptidase-like 49
AT1G03680	O48737	25.7992	24.0282	25.0291	25.6211	24.2019	23.0284	24.9406	23.2141	23.2083	25.5528	25.3731	25.3397	28.0298	27.3855	27.7138	4	4	31.8	31.8	19.664	Thioredoxin M1, chloroplastic
AT1G02500	P23686	23.6897	23.4588	23.2213	22.5628	22.5035	23.7602	24.2781	23.6394	23.372	26.4432	24.0429	26.3167	27.3355	28.2254	28.1896	15	4	56	12.5	43.158	S-adenosylmethionine synthase 1
AT2G28190	O78310	24.5864	24.6485	24.1087	24.4704	23.5275	26.3249	23.746	22.9279	23.8864	25.6262	24.0748	24.4247	27.0674	27.1612	27.3759	4	4	24.1	24.1	22.244	Superoxide dismutase [Cu-Zn] 2, chloroplastic
AT5G51100	Q9LU64	23.4882	23.364	24.6256	22.2315	23.6996	25.3399	24.465	23.1615	23.6031	25.6548	25.7502	25.9283	28.0858	27.6281	27.8467	9	9	48.9	48.9	34.663	Superoxide dismutase [Fe] 2, chloroplastic
AT5G34940	F4JWV6	25.958	26.2885	25.9434	26.2105	26.3025	26	25.965	25.9166	25.6434	26.0287	25.9922	25.9681	26.1584	26.2721	26.154	5	5	17.8	17.8	42.594	Heparanase-like protein 3
AT1G70310	O48661	24.3087	24.9045	23.9837	26.5636	22.7443	24.1176	26.4984	26.3507	26.5909	26.7371	26.8546	26.9841	25.7594	26.0621	25.7511	10	6	56.2	38.5	37.14	Spermidine synthase 2
AT4G30880	F4JR37	26.7515	27.0768	26.797	26.8102	26.6787	26.7336	26.3844	26.7325	26.6776	23.8227	24.21	24.9506	23.2316	23.5465	23.1072	1	1	11	11	11.46
AT3G45310	F4J5J9	23.6229	24.3632	22.9055	22.5345	23.422	22.3165	26.433	26.5252	25.9102	25.979	26.8351	26.6922	26.8916	26.9595	27.1122	8	8	41.7	41.7	39.484	Thiol protease aleurain-like
AT3G44590	Q9LXM8	23.9597	23.2013	24.5361	23.3668	23.2638	23.6721	24.2415	24.2874	22.4473	26.886	26.7843	26.762	27.5101	27.4807	26.9295	3	3	40.5	40.5	11.015	60S acidic ribosomal protein P2-4
AT1G13270	Q9FV52	23.9129	22.7587	22.5356	23.0587	23.4151	23.4465	25.6292	23.8207	23.9467	26.8588	27.4976	26.7408	26.9114	27.2977	27.1633	3	3	20.6	20.6	40.424	Methionine aminopeptidase 1B, chloroplastic
AT1G54860	Q9ZVL0	23.1255	23.8785	22.7702	26.0065	24.427	26.1208	26.1681	25.8625	26.148	26.4482	23.9772	23.9056	26.3053	26.5389	26.2553	2	2	12	12	21.569
AT1G11650	Q9SAB3	25.7031	25.8268	23.2407	25.9568	25.7035	25.7797	24.8922	23.7233	24.5831	26.3551	26.5993	26.4595	27.0592	26.9504	26.9801	5	5	22.9	22.9	33.43	Polyadenylate-binding protein RBP45B
AT4G17520	O23593	23.9716	24.2176	22.0851	24.2115	23.0476	22.8996	23.6448	23.8953	24.0501	26.7025	26.8377	27.5913	27.1765	26.9	27.3271	7	7	28.3	28.3	38.905
AT4G02580	O22769	22.7136	26.3868	23.3412	23.8905	23.5049	23.8696	23.5856	23.738	24.0176	27.1685	26.7696	26.5875	27.3897	27.0967	26.6838	6	6	28.6	28.6	28.388	NADH dehydrogenase [ubiquinone] flavoprotein 2, mitochondrial
AT2G29300	F4IKL5	26.5416	26.678	27.1057	26.23	26.6036	26.4719	26.558	26.9175	26.5668	26.0604	23.3656	24.4599	24.1334	23.8719	23.1913	5	4	19.9	17.1	31.297	Tropinone reductase homolog At2g29300
AT4G32720	Q93ZV7	23.5507	24.2675	23.809	23.0671	22.4199	23.2394	25.8623	25.8772	25.9768	26.715	26.9732	26.8165	26.6535	26.6351	26.9943	9	9	36.6	36.6	44.968	La protein 1
AT2G40290	A2RVK1	25.5074	25.6367	25.6701	25.5377	25.441	23.8915	25.7846	25.6516	25.7952	26.4553	26.8916	26.5443	25.959	25.9856	25.9344	3	3	17	17	27.681
AT4G14710	B3H6E4	25.9848	26.3383	26.0158	26.1876	26.2621	25.7611	25.7645	25.6876	25.5295	25.9142	25.7287	26.1821	26.0385	25.9935	25.9903	4	4	24.7	24.7	21.598	1,2-dihydroxy-3-keto-5-methylthiopentene dioxygenase;1,2-dihydroxy-3-keto-5-methylthiopentene dioxygenase 2;1,2-dihydroxy-3-keto-5-methylthiopentene dioxygenase 3
AT1G75350	Q9FWS4	23.794	23.185	23.7688	23.2577	24.7471	24.2524	24.2071	23.2747	24	25.5127	27.0357	26.6617	27.3233	28.0126	27.2415	5	5	34	34	16.033	50S ribosomal protein L31, chloroplastic
AT4G17040	Q8LB10	24.3028	22.86	23.5792	23.6197	23.7377	22.9566	26.4831	26.1463	25.8714	26.2029	25.5922	25.7427	27.7392	27.2238	26.9534	6	6	20.3	20.3	33.44	ATP-dependent Clp protease proteolytic subunit-related protein 4, chloroplastic
AT1G59700	Q9XIF8	26.6703	26.7004	26.7884	26.0415	26.6317	26.1693	26.1795	26.0751	23.7283	23.9608	23.247	25.3705	26.4794	25.6965	25.6364	5	5	27.8	27.8	26.506	Glutathione S-transferase U16
AT1G16770	Q9FWR1	26.9672	26.6748	26.5329	26.872	26.4506	26.3352	25.6784	26.0614	25.9802	23.6397	25.6521	25.1715	23.826	23.3035	25.5994	5	5	20.1	20.1	36.216
AT1G29370	Q8VZT4	25.2007	22.8755	24.1146	23.9732	24.639	23.3149	23.2729	25.5858	23.4122	26.3536	26.7008	26.8731	26.9164	27.3139	27.2254	4	4	8.1	8.1	90.887
AT4G38220	Q8S9L3	22.8404	25.9714	26.047	25.1838	25.6383	25.9443	24.0978	25.7348	25.6742	25.0431	24.5898	25.8715	27.5506	26.9787	26.4714	11	11	37.9	37.9	47.739	Aminoacylase-1
AT5G58330	F4KEX3	23.5127	25.2132	23.5223	23.6532	24.2316	23.7634	25.9089	24.5904	23.4759	26.3041	26.0993	26.631	27.3514	27.3256	27.1309	7	7	41	41	36.39	Malate dehydrogenase
AT3G04610	A0A1I9LM90	24.1044	26.2615	23.764	26.1686	25.4533	25.5025	24.7024	24.8956	25.71	25.7012	25.8871	25.9584	26.9386	26.7523	26.8387	9	9	23.9	23.9	60.577	Flowering locus K homology domain
AT5G41970	F4K000	23.6864	23.905	23.9363	23.9391	24.0886	24.1025	22.7549	23.4175	24.184	26.6827	26.9154	27.0128	27.0971	27.3465	27.0189	8	8	25.2	25.2	42.299
AT5G23120	O82660	23.1983	23.8538	23.3404	23.7889	23.9364	23.7314	24.2165	22.2681	24.4534	23.3996	25.7261	25.6036	27.8722	28.2224	27.7099	11	11	41.2	41.2	44.103	Photosystem II stability/assembly factor HCF136, chloroplastic
AT4G26840	P55852	24.1559	24.332	23.6598	24.099	23.8654	23.165	24.4488	23.9247	23.8069	26.5654	25.9215	25.7197	27.5757	27.8148	27.5359	4	2	54	36	10.976	Small ubiquitin-related modifier 1
AT5G46180	Q9FNK4	23.2528	23.4008	24.508	25.6879	23.8931	27.0357	26.0505	26.6734	25.6232	26.7624	27.0861	25.9343	24.8165	25.5287	25.8445	10	10	27.2	27.2	52.177	Ornithine aminotransferase, mitochondrial
AT5G16390	F4KE21	23.7731	23.7949	23.2327	23.6026	23.7366	23.4359	23.3672	24.3291	23.7899	24.7817	26.3516	23.6366	27.5759	27.9333	27.884	5	5	25.6	25.6	26.927	Biotin carboxyl carrier protein of acetyl-CoA carboxylase 1, chloroplastic
AT3G03780	Q9SRV5	22.546	25.2887	23.163	23.9417	24.9912	24.7232	24.1977	23.2847	24.1125	26.8767	26.7365	26.7648	27.1473	27.2704	27.3902	30	8	48	18.3	84.583	5-methyltetrahydropteroyltriglutamate--homocysteine methyltransferase 2
AT5G28050	Q94BU8	23.4221	23.7333	24.1964	23.5787	25.3283	23.3706	23.5797	25.1883	23.9424	26.2909	25.776	26.1511	27.9119	27.5231	27.7633	4	4	55.7	55.7	20.001
AT1G56110	Q9SGT7	24.2335	22.0201	24.2351	24.2961	22.7527	23.9949	26.4661	26.811	26.4568	26.9781	27.0658	27.1464	25.3806	25.381	25.4271	9	9	28.2	28.2	58.673
AT1G79340	O64517	25.8158	22.4038	25.0231	23.4376	25.3115	23.3875	25.772	25.5478	24.1074	26.2479	26.6022	27.3524	26.823	26.5267	25.9344	3	3	9.6	9.6	45.483	Metacaspase-4;Metacaspase-4 subunit p20;Metacaspase-4 subunit p10;Metacaspase-5
AT3G56070	Q38867	23.2199	22.7739	24.3909	23.2993	23.8703	26.7133	27.141	26.6284	22.7051	25.4962	26.6196	27.1055	24.909	24.6792	24.4485	8	7	60.8	56.8	18.92	Peptidyl-prolyl cis-trans isomerase CYP19-3
AT5G46020	Q9FNM0	24.3589	23.0637	24.9075	24.2161	22.2628	24.0278	21.7833	23.2344	22.5508	27.2593	27.0686	26.1042	26.2999	26.9079	27.0091	4	4	20.1	20.1	18.977
AT1G14610	P93736	26.1105	24.4868	24.9296	25.524	25.4308	26.2125	26.143	26.9661	26.6715	25.5954	26.7559	26.4828	24.5944	23.4473	24.1577	5	5	7.6	7.6	125.92	Valine--tRNA ligase
AT3G15190	Q9ASV6	23.2	23.1421	23.7798	23.5561	23.5977	24.5846	24.8726	23.3406	24.0104	24.3087	23.3547	23.693	28.3641	28.2018	27.6039	5	5	18.8	18.8	21.826	30S ribosomal protein S20, chloroplastic
AT3G18820	Q9LS94	26.3313	26.4431	26.3773	26.1764	25.7027	24.6175	23.7598	26.0527	26.0816	26.0437	26.1441	26.0617	22.7611	23.7703	22.4638	3	3	17	17	23.102	Ras-related protein RABG3f;Ras-related protein RABG3c;Ras-related protein RABG3d
AT4G33510	Q00218	23.416	24.4098	23.3465	24.4856	24.5781	23.5506	23.2613	24.2135	23.6288	27.0331	26.8501	26.8234	27.0591	27.3313	27.118	8	6	22.9	18.9	56.148	Phospho-2-dehydro-3-deoxyheptonate aldolase 2, chloroplastic
AT5G61410	Q9SAU2	26.0603	26.1791	26.096	26.1799	25.8071	26.1277	25.8215	26.3719	24.6803	26.1067	26.6308	25.8653	25.6071	24.7875	25.4916	4	4	26.3	26.3	30.008
AT1G47260	Q9C6B3	22.7854	24.1938	24.1766	25.4342	24.414	25.9867	22.3115	24.1507	22.9033	27.0002	26.6798	26.565	27.3597	26.7405	26.3114	6	5	40.6	36.7	30.065	Gamma carbonic anhydrase 2, mitochondrial
AT3G55260	A7WM73	25.9525	25.9725	26.2938	25.7928	26.0285	26.2324	25.9134	25.9508	25.6775	25.9173	26.3049	26.0428	23.714	25.3779	24.6227	8	7	17.6	16.1	61.229	Beta-hexosaminidase 1
AT5G43830	Q9FG81	24.4893	23.5899	22.9756	23.8334	23.9573	24.208	25.6348	23.6937	23.0012	25.9727	26.4796	26.0796	27.27	27.407	27.0591	5	5	31.1	31.1	27.509
AT4G33090	Q8VZH2	22.7775	22.5642	23.5237	22.7792	22.4387	25.3566	26.6865	26.4222	26.6356	26.6732	26.242	26.3729	23.303	23.7619	26.0134	7	7	10.9	10.9	98.178	Aminopeptidase M1
AT1G74960	Q9C9P4	22.9378	26.3397	26.3225	26.3613	26.9962	26.3908	26.2317	26.4965	25.7717	25.7664	25.8765	25.5542	24.8614	24.0236	24.3528	5	5	17.4	17.4	57.599	3-oxoacyl-[acyl-carrier-protein] synthase II, chloroplastic
AT2G17390	Q29Q26	24.1215	24.4538	23.8718	22.8203	24.4286	23.532	23.62	23.84	23.4091	26.5729	26.418	26.7575	27.5936	27.4286	27.1347	9	7	43.9	38.1	36.899
AT2G15010	Q8VZK8	26.0808	26.5177	25.9118	24.217	26.5773	26.577	26.4298	24.219	26.6737	25.5394	25.6781	25.0096	24.0743	23.3482	23.591	2	2	23.7	23.7	14.259	Probable thionin-2.3;Probable thionin-2.3;Acidic protein
AT3G17940	Q9LVH6	25.8951	25.9742	25.8396	25.6954	25.8303	25.8992	25.5725	25.6877	25.6435	25.6852	25.7428	25.805	26.2819	26.135	25.9145	3	3	21.4	21.4	37.196	Aldose 1-epimerase
AT5G08380	Q9FT97	26.0147	26.4511	26.2765	26.0989	26.3183	23.1649	26.2207	26.1551	23.7516	26.1629	25.7316	23.8375	25.804	25.7795	25.7175	6	6	21	21	45.709	Alpha-galactosidase 1
AT2G30200	Q8RU07	25.6722	25.5816	25.7642	25.8901	26.3885	25.8238	25.8288	23.8885	25.4882	25.3019	25.587	25.7292	25.7329	26.0772	26.1614	7	7	25.2	25.2	41.522
AT1G47710	Q9S7T8	26.0297	26.1916	26.1966	26.0192	25.7454	26.0734	25.7208	25.84	25.9959	25.3563	25.6103	25.1875	26.3473	23.7791	25.902	5	5	11.5	11.5	42.639	Serpin-ZX
AT5G19440	Q29Q34	25.8212	25.793	26.1807	24.6148	26.128	24.0852	26.1135	26.1631	26.3421	26.1458	25.6104	26.19	25.2164	25.1982	25.173	3	3	8.6	8.6	35.593
AT2G44050	O80575	24.5733	26.0043	26.2203	26.3065	26.2275	25.8173	25.6012	25.5594	24.2103	25.9897	26.0778	26.2103	25.4673	25.6438	25.5827	3	3	15.9	15.9	24.024	6,7-dimethyl-8-ribityllumazine synthase, chloroplastic
AT1G62640	P49243	26.3159	26.8795	26.3679	24.2913	26.7411	26.2012	26.0914	26.0148	25.986	23.6739	23.7122	26.2005	23.0848	24.8883	24.4902	4	4	21.8	21.8	42.846	3-oxoacyl-[acyl-carrier-protein] synthase III, chloroplastic
AT4G24820	Q93Y35	26.0099	26.2938	25.7731	23.4019	26.1369	25.8731	26.5404	26.3846	26.5013	26.5023	26.2234	23.9918	23.3828	23.1369	23.8904	4	4	16.5	16.5	44.282	26S proteasome non-ATPase regulatory subunit 6 homolog
AT5G13450	Q96251	24.0471	24.2087	22.4835	24.0671	22.8172	23.6606	22.7404	24.0442	24.8948	23.5563	26.382	24.0816	27.9518	27.2844	26.8114	3	3	16.4	16.4	26.321	ATP synthase subunit O, mitochondrial
AT5G61510	A1L4Y4	26.9842	27.1492	26.7526	26.8516	26.7523	27.4562	20.9098	22.3835	24.5566	20.3114	23.3309	24.7608	22.2956	24.7885	21.6811	7	7	34.5	34.5	44.022
AT4G30170	Q96522	22.5627	23.099	24.2956	24.1278	25.0371	24.6761	22.7286	23.0783	22.7743	23.6218	26.5525	22.7808	27.6218	27.6254	27.5205	9	8	34.8	31.1	35.828	Peroxidase 45
AT1G33040	Q8LGC6	23.2117	23.5488	23.5275	23.7896	23.8165	23.9427	22.6513	24.2777	23.4343	26.5922	26.0834	26.3022	27.5199	27.4574	27.5051	5	5	29.7	29.7	22.78	Nascent polypeptide-associated complex subunit alpha-like protein 5
AT5G44720	O48588	26.5691	26.4437	26.5093	26.3886	26.38	24.1377	25.7945	25.7892	26.1181	25.1379	25.5924	23.6559	25.3333	25.1475	25.3181	6	6	31.2	31.2	34.798
AT2G30060	Q8RWG8	23.5683	24.4264	23.7448	22.8313	23.675	25.1863	23.2319	24.9096	23.9652	26.9703	26.5763	26.6392	27.286	26.7487	27.0069	5	4	44.7	37.8	24.389	Ran-binding protein 1 homolog b
AT5G66530	Q9FJY6	25.7287	25.7473	25.941	26.0114	26.0114	25.9946	25.8504	25.4722	25.542	25.3406	25.5238	25.1898	25.8835	26.0589	26.0712	3	3	15	15	33.692
AT2G38270	Q8H7F6	23.4935	25.9318	23.0437	24.0455	23.0739	27.1442	25.0484	25.7976	23.7758	26.3718	26.3692	26.6976	24.6696	26.7534	25.4715	8	8	43.7	43.7	32.205	Bifunctional monothiol glutaredoxin-S16, chloroplastic
AT1G62400	Q2MHE4	23.2018	26.5799	26.762	24.446	23.8058	26.5054	26.141	26.7886	26.7195	25.7406	25.5679	25.3841	23.1194	24.7715	23.9333	1	1	2.8	2.8	44.281	Serine/threonine-protein kinase HT1
AT3G63460	F4J109	24.176	25.9251	22.5649	23.5369	23.4162	25.6541	24.1356	25.8728	26.2941	26.4681	25.8984	26.3416	25.5096	25.1894	25.8798	9	9	15.3	15.3	119.72	Protein transport protein SEC31 homolog B
AT5G11880	Q94A94	23.739	24.3639	23.9594	23.1001	23.0233	24.1812	23.3623	23.7125	25.184	27.0256	26.9192	26.8916	26.5695	26.8199	26.8193	10	4	25.2	9.2	54.163	Diaminopimelate decarboxylase 2, chloroplastic
AT3G12800	Q9LTV6	25.3898	26.1676	26.2234	23.6737	26.1165	26.1206	23.6111	25.8222	26.0133	25.9305	25.8178	23.575	22.9565	24.1361	23.6256	3	3	12.4	12.4	31.796	Peroxisomal 2,4-dienoyl-CoA reductase
AT1G60940	Q9C958	25.7286	25.8921	25.7394	26.0533	25.9907	25.761	26.1833	24.0563	26.1469	25.9946	25.7408	25.8208	23.6398	25.6061	25.5183	6	4	18.8	12.2	41.039	Serine/threonine-protein kinase SRK2B;Serine/threonine-protein kinase SRK2A;Serine/threonine-protein kinase SRK2E;Serine/threonine-protein kinase SRK2J;Serine/threonine-protein kinase SRK2I;Serine/threonine-protein kinase SRK2D
AT4G27000	Q93W34	24.0352	23.1017	24.8107	23.5609	23.755	24.2658	26.521	23.7946	22.7404	26.194	26.2174	26.2854	26.9249	26.7954	26.5706	4	4	18.3	18.3	44.972	Polyadenylate-binding protein RBP45C
ATCG00750	P56802	23.0232	25.6127	22.7372	23.4743	24.7662	24.0942	25.0304	22.5022	24.5979	26.4218	26.448	23.9704	27.527	27.7832	27.384	5	5	34.1	34.1	15.023	30S ribosomal protein S11, chloroplastic
AT4G30920	Q944P7	23.4281	22.5639	25.557	26.158	25.8427	25.3527	25.4892	24.1825	23.2157	26.0065	25.6505	25.658	26.9107	26.6547	26.8517	11	6	26.9	15.4	61.306	Leucine aminopeptidase 3, chloroplastic
AT2G45790	O80840	22.4363	23.0059	23.4577	24.9273	22.5971	24.1515	23.4108	22.8615	23.553	26.6563	26.6976	26.7523	26.8217	24.7312	24.4916	7	7	34.6	34.6	27.761	Phosphomannomutase
AT5G19370	Q93WI0	22.8506	24.381	22.8524	23.0182	23.564	23.7595	23.8594	24.0014	24.1596	26.5496	26.5008	26.8113	26.9079	26.9422	27.272	6	6	30.1	30.1	32.98	Rhodanese-like/PpiC domain-containing protein 12
AT1G10290	Q9SE83	25.8173	24.5754	23.8666	24.5167	24.3533	25.7686	24.1997	23.8517	22.5273	26.6428	26.6079	26.3839	26.4808	26.5982	26.8065	7	2	8.5	2.6	99.165	Dynamin-2A
AT1G52570	Q9SSQ9	25.3172	23.0878	25.1004	27.2269	23.5314	25.1467	23.685	24.9259	25.653	26.3166	26.2339	26.1337	23.0883	23.6245	26.2812	6	2	8.4	3.1	91.597	Phospholipase D alpha 2
AT3G27300	A0A1I9LLZ7	26.4891	26.5376	26.1881	25.949	25.8469	26.17	26.3084	26.178	26.1989	25.3011	25.1452	25.1859	23.2646	22.8016	22.8539	6	6	19.5	19.5	65.603	Glucose-6-phosphate 1-dehydrogenase, cytoplasmic isoform 1
AT2G30620	F4INW2	25.2937	25.7813	25.5473	25.8268	25.8089	25.6527	26.3595	25.9071	25.7979	25.8526	25.5504	25.6483	25.5891	25.5961	25.4462	3	3	13.9	13.9	21.549	Histone H1.2
AT3G11940	P51427	25.8684	26.0252	25.8361	25.7519	25.6164	25.6293	26.604	26.0348	24.3989	22.7411	26.4486	26.7451	22.3139	22.6604	22.4476	5	1	37.7	9.2	22.921	40S ribosomal protein S5-2
AT3G15000	Q9LKA5	24.2459	25.131	24.2098	23.7165	23.8096	23.1855	23.8671	23.6687	22.7344	27.2439	26.6999	26.4513	23.7058	26.5579	23.8778	4	4	12.9	12.9	42.869	Multiple organellar RNA editing factor 8, chloroplastic/mitochondrial
AT1G24735	F4IAT5	25.7687	27.1745	26.0916	22.5628	25.161	27.5456	23.8774	25.9751	26.1819	24.1856	22.806	26.0925	23.5991	24.0164	23.5335	3	3	30.4	30.4	27.025
AT3G63540	P82658	24.1057	24.3039	24.0485	24.9438	23.767	23.0245	23.8174	24.0564	24.0984	24.4479	23.8237	22.7078	28.1818	27.8101	27.62	5	5	34.5	34.5	24.979	Thylakoid lumenal 19 kDa protein, chloroplastic
AT5G12110	Q84WM9	23.7161	25.2007	25.496	25.2537	23.484	24.664	22.4648	23.9479	23.8671	24.7762	24.4117	23.9122	26.0161	26.051	25.7752	7	4	28.1	17.5	24.788	Elongation factor 1-beta 1
AT3G13235	F4JC86	23.5804	23.476	23.4567	22.8515	24.7591	24.116	26.0401	23.5174	23.4873	26.4634	25.5942	24.5959	27.4896	26.8163	26.8749	6	6	25.9	25.9	45.272
AT1G70810	Q9SSL1	26.4245	26.286	26.7042	26.1604	26.1204	26.4698	25.8361	26.3103	26.4963	24.0215	25.2369	25.4172	23.5879	23.882	24.0176	4	4	26.7	26.7	18.657
AT4G30290	Q9M0D1	23.3937	23.8736	23.5907	24.3305	23.6201	23.1049	25.9738	23.2973	23.7935	26.3782	26.6046	26.574	26.7165	26.9086	26.8054	8	3	41.9	22.4	31.562	Probable xyloglucan endotransglucosylase/hydrolase protein 19
AT3G15020	Q9LKA3	25.1392	25.0835	25.6664	25.9985	25.9051	25.5883	25.9584	26.1337	25.771	26.5467	24.7295	25.839	24.5115	25.2499	25.031	12	5	51.6	34.3	35.875	Malate dehydrogenase 2, mitochondrial;Malate dehydrogenase
AT1G32470	Q9LQL0	23.6505	24.2806	23.1814	23.6849	24.2891	23.7035	24.0096	23.6	23.0426	23.7202	23.4825	23.8409	27.978	27.9782	27.6826	4	2	29.5	12	17.897	Glycine cleavage system H protein 3, mitochondrial
AT1G74560	Q9CA59	24.8494	23.1573	23.7856	24.3351	23.2898	23.0929	24.7315	24.5929	23.5196	26.5362	26.6503	26.7196	27.0628	23.2369	26.8708	4	2	32	18	29.416	NAP1-related protein 1
AT4G31840	Q9SZ51	24.7052	23.484	23.4657	24.8049	24.5524	23.5943	24.1371	24.677	24.4312	22.8487	23.7367	24.0935	27.4457	27.4173	27.2259	4	4	21.5	21.5	18.961
AT4G11120	Q5XF75	23.6627	22.7169	23.4399	23.7269	23.0928	23.9799	25.6891	25.4286	25.2887	26.1918	26.5028	26.5419	26.6439	26.6031	26.4724	5	5	21.5	21.5	43.191	Elongation factor Ts, mitochondrial
AT1G29150	Q9LP45	25.8706	25.7834	25.9703	25.5061	25.6601	25.729	26.7645	26.099	26.011	25.4286	26.133	25.7437	23.3471	24.7138	23.6506	6	6	19.6	19.6	46.749	26S proteasome non-ATPase regulatory subunit 11 homolog
AT5G47550	Q41916	26.6136	25.955	26.4027	26.2987	26.0709	25.5207	23.2178	24.1907	23.3749	23.9744	25.0842	23.7868	25.5885	25.6593	25.4625	2	2	33.6	33.6	13.372	Cysteine proteinase inhibitor 5
AT2G31570	O04922	24.3598	22.7108	24.2208	25.0857	23.8347	24.1171	24.2691	24.4705	24.2054	26.0976	25.3112	25.3379	27.8466	27.6431	27.3217	6	5	53.3	47.3	18.944	Probable glutathione peroxidase 2
AT1G09010	Q75W54	25.9659	26.1986	25.8559	24.953	25.7275	25.8113	25.7594	25.7193	25.4343	25.3374	24.5215	25.5263	26.4355	26.2727	25.4829	7	7	10.9	10.9	107.66	Mannosylglycoprotein endo-beta-mannosidase;Mannosylglycoprotein endo-beta-mannosidase 31 kDa subunit;Mannosylglycoprotein endo-beta-mannosidase 28 kDa subunit;Mannosylglycoprotein endo-beta-mannosidase 42 kDa subunit
AT5G36210	F4K2Y3	24.2804	23.9141	24.3388	23.9993	23.7505	23.6976	25.4073	25.3939	25.468	23.9737	23.431	25.9545	25.722	23.667	24.913	4	4	10.8	10.8	81.305
AT5G23900	Q9FF90	23.9162	22.5205	22.9381	23.8799	22.5995	24.0468	22.8761	23.8748	24.4751	26.7534	26.5552	26.3526	27.1867	27.1715	27.1089	7	4	41.7	24.3	23.485	60S ribosomal protein L13-3
AT4G29680	Q9SU83	26.1151	24.4849	25.4662	26.9255	25.5467	23.4779	24.8191	23.5253	24.9006	25.5313	23.3958	25.3445	26.1626	25.7127	25.8483	7	7	22.6	22.6	54.678
AT4G12420	Q9SU40	23.6571	25.7625	24.3008	26.9298	23.4645	25.6876	26.1391	24.5224	25.0878	26.2112	26.3042	23.3899	25.8596	25.6885	25.1936	4	4	12.1	12.1	65.637	Monocopper oxidase-like protein SKU5
AT1G08520	Q9SJE1	24.4158	23.0738	23.1863	24.5313	23.3685	22.9965	22.9101	22.901	23.7194	25.9447	25.8333	25.9326	27.5753	27.5394	27.3021	11	11	19.6	19.6	83.283	Magnesium-chelatase subunit ChlD, chloroplastic
AT4G26630	Q9SUA1	25.5754	23.8234	25.5991	25.2022	25.5254	25.3948	25.452	25.5	25.7914	25.8927	25.1204	25.6756	26.6566	26.4766	25.9812	6	6	11.1	11.1	85.248
AT1G15140	Q9XI55	23.752	23.1675	24.3131	23.6367	24.5506	23.6915	24.5478	23.0996	23.338	23.7952	25.6567	25.1795	27.3748	27.5496	27.6203	2	1	12.5	8.5	31.923
AT3G02560	A0A178VB48	24.6627	23.8415	23.4448	22.6636	23.2125	24.085	24.0849	24.0675	23.4894	26.5212	26.2372	26.2321	27.1329	26.7512	26.8033	8	5	50.8	40.8	22.196	40S ribosomal protein S7-2
AT4G26900	Q9SZ30	25.58	25.2803	23.6573	23.7138	23.3417	24.1938	22.6779	22.6506	24.0066	25.767	25.9297	26.4728	25.6289	27.2782	26.3357	7	7	22	22	64.192	Imidazole glycerol phosphate synthase hisHF, chloroplastic;Glutamine amidotransferase;Cyclase
AT5G05480	Q9FFG6	25.561	25.8417	24.0844	25.5434	23.7064	23.7482	23.6552	24.638	25.6467	23.3031	23.3298	24.3465	25.725	25.5769	25.6556	5	5	14.5	14.5	68.434
AT1G27090	Q9LFX8	23.959	23.2601	23.1146	24.185	23.9284	24.5064	23.233	23.6715	23.7203	27.6393	27.6324	23.9466	23.5933	25.0382	25.57	6	6	20.5	20.5	46.018
AT4G35260	Q8LFC0	23.1382	24.96	25.0901	26.2878	25.8816	25.0851	25.792	25.9541	25.3885	26.1645	25.5969	26.038	25.4374	25.239	25.331	5	4	21.8	21.8	39.626	Isocitrate dehydrogenase [NAD] regulatory subunit 1, mitochondrial
AT5G52520	Q9FYR6	23.3941	23.8066	23.5406	23.7675	23.583	23.8592	23.7587	23.9861	23.5804	25.8187	26.0607	26.3889	27.5116	27.0312	27.2568	9	9	25	25	60.746
AT1G01050	Q93V56	25.29	24.6486	23.9188	23.2657	24.3707	22.606	23.8638	24.0573	24.7504	23.7042	24.3649	23.8779	27.0716	27.3366	27.3821	3	1	22.6	13.2	24.484	Soluble inorganic pyrophosphatase 1
AT1G18070	Q8L835	25.1031	22.9808	25.0274	25.1985	25.7009	23.8189	26.3393	25.4366	25.1438	24.2475	26.5408	25.5688	25.6286	26.1315	25.924	6	6	17.7	17.7	59.242
AT5G13690	Q9FNA3	26.0647	23.7533	26.2564	24.2	24.2969	23.7957	26.0752	23.8609	26.1037	25.5669	25.5073	26.2962	23.5164	23.9966	25.4789	8	8	11.9	11.9	92.688
AT5G62350	Q9LVA4	23.6862	23.3015	22.1364	23.9588	22.6365	23.5433	23.5508	26.1777	25.4707	27.0169	26.332	26.4334	26.5766	26.5246	26.0817	3	3	27.2	27.2	22.179
AT1G62780	Q8VY70	23.3373	24.0208	24.3532	23.6915	23.8866	23.635	23.3594	22.4581	24.0455	25.4271	25.5292	25.8759	27.8847	27.374	27.2665	10	10	55.3	55.3	27.219
AT1G69740	Q9SFH9	24.0219	23.8876	23.73	24.7947	22.3897	22.4216	24.0808	23.6336	23.1761	26.4548	24.2111	23.3885	27.8947	27.6283	27.4461	9	9	32.8	32.8	46.69	Delta-aminolevulinic acid dehydratase 1, chloroplastic
AT1G62380	Q41931	24.0441	23.903	24.502	24.0134	22.7492	24.6621	23.3729	24.751	23.2701	22.4545	23.9337	23.5689	27.9239	27.9424	27.7909	7	7	43.8	43.8	36.183	1-aminocyclopropane-1-carboxylate oxidase 2
AT3G15360	Q9SEU6	23.0546	22.573	23.4121	23.2906	24.3492	23.7043	23.7013	23.8625	23.7347	24.3111	25.2839	24.7643	27.7935	27.9515	27.1626	5	5	29.5	29.5	21.172	Thioredoxin M4, chloroplastic
AT4G27960	F4JKF3	25.5046	25.7513	25.8969	24.5579	25.8999	26.0591	26.067	25.8659	26.0251	23.3468	23.6272	26.5667	24.461	25.0493	24.8542	2	2	31.5	31.5	20.212	Ubiquitin-conjugating enzyme E2 10;SUMO-conjugating enzyme UBC9;Ubiquitin-conjugating enzyme E2 8;Ubiquitin-conjugating enzyme E2 28;Ubiquitin-conjugating enzyme E2 11
AT1G10670	Q9SGY2	24.9843	25.689	26.1003	25.7007	25.9028	25.5415	23.4351	26.0552	25.8879	24.4255	25.3517	25.3789	25.8882	25.6879	25.7356	5	4	17	14.4	46.678	ATP-citrate synthase alpha chain protein 1
AT5G19140	Q94BR2	24.9009	25.774	26.1155	25.5728	22.4234	25.2371	25.6891	24.5465	23.6755	25.6308	25.2008	25.365	26.6894	26.6027	26.3958	7	7	43.2	43.2	25.015
AT5G61790	P29402	24.1765	25.042	24.3501	24.2699	23.6722	25.9812	23.6982	26.0797	26.0341	27.1486	26.1534	26.0742	25.9243	23.0001	23.2151	4	4	11.9	11.9	60.485	Calnexin homolog 1;Calnexin homolog 2
AT2G21390	Q9SJT9	23.9084	25.5867	24.9746	25.4626	23.4232	25.4177	25.9089	25.5925	26.1355	26.071	25.9722	25.9029	25.3719	25.558	25.3856	6	2	8.9	3.9	136.47	Coatomer subunit alpha-2
AT5G46430	Q9FHG2	23.6592	23.4421	24.5234	23.4089	23.191	23.8166	23.8738	24.0001	22.9772	26.2308	26.3037	25.8627	23.6681	24.4817	26.2301	5	2	33.8	21.1	15.475	60S ribosomal protein L32-2
AT1G13440	Q9FX54	26.9015	23.2577	27.4757	24.3989	24.6504	24.8803	25.6944	23.33	23.2813	23.2726	23.4786	25.2135	26.1585	25.7855	25.6946	29	4	81.7	18.6	36.913	Glyceraldehyde-3-phosphate dehydrogenase GAPC2, cytosolic
AT3G53580	Q9LFG2	22.6463	23.7028	23.6843	22.7966	23.7785	22.6777	22.6594	23.5994	24.01	26.8281	26.5007	26.5267	26.8405	27.0084	26.9458	5	5	19.1	19.1	38.984	Diaminopimelate epimerase, chloroplastic
AT2G20560	Q9SIL3	26.0742	26.2932	26.3824	26.3272	26.2602	26.2028	26.0105	25.6029	26.1721	22.1395	25.0017	24.5765	24.4211	22.3856	23.94	3	3	11.9	11.9	37.109
AT4G34450	Q0WW26	25.5192	25.1166	25.1102	25.8832	25.7241	25.1578	26.2058	26.1797	25.5627	26.0785	26.1364	25.9843	23.3593	23.8842	24.1582	9	9	16.9	16.9	98.49	Coatomer subunit gamma
AT5G58590	P92985	24.9971	25.7152	22.0539	23.4913	25.8707	25.5388	26.0526	26.0329	25.4706	26.0891	26.2042	25.9993	23.759	22.3704	25.3194	2	1	13.7	10	24.722	Ran-binding protein 1 homolog c
AT4G14960	P29511	23.0141	23.5744	24.3106	23.2805	24.1654	23.9981	24.2424	23.398	23.5318	27.1795	23.1348	24.4274	27.1145	27.1704	27.2451	20	1	60.9	3.1	49.537	Tubulin alpha-6 chain
AT3G26450	Q9LIN0	24.1109	24.2196	23.9277	24.6258	23.2246	22.2045	23.8082	24.0953	23.576	22.9653	23.0773	23.7075	28.0162	27.9057	27.5552	7	5	49.3	44.1	17.791
AT5G04740	Q9LZ23	23.6069	23.376	23.2156	23.4976	22.3109	24.716	24.6421	24.8385	22.7046	26.1663	25.6911	25.5777	27.6128	27.6676	26.7704	5	5	22.6	22.6	33.242	ACT domain-containing protein ACR12
AT5G63890	Q9C5U8	23.3607	23.9911	24.7725	23.4012	23.5204	22.4862	23.8267	24.1683	23.7575	26.2691	26.5153	26.2312	26.5607	26.5072	26.7146	7	7	29.4	29.4	48.956	Histidinol dehydrogenase, chloroplastic
AT4G35000	Q42564	24.0077	24.2438	23.5057	23.8818	22.8638	24.737	23.5703	24.0497	23.9656	26.9002	27.3219	27.2853	26.2833	26.3712	25.4834	5	5	27.2	27.2	31.571	L-ascorbate peroxidase 3, peroxisomal
AT3G07480	Q9SRR8	23.8766	24.8771	24.6002	24.1033	23.7397	25.0303	23.8918	22.6134	23.4212	26.3946	26.1525	24.0115	27.368	27.368	26.9612	5	5	45.9	45.9	17.602
AT3G20390	A0A1I9LS34	24.3245	24.4988	22.5766	23.4373	24.2233	24.5108	22.9357	23.7763	26.0274	25.926	25.7049	25.6147	27.125	27.0719	26.811	6	6	35.7	35.7	27.8	Reactive Intermediate Deaminase A, chloroplastic
AT4G25080	Q9SW18	24.1549	23.6291	22.7223	24.4403	23.3337	23.7104	23.9923	22.6785	23.9807	25.9315	23.3052	24.3151	27.4436	28.2532	27.1996	7	7	38	38	27.148	Magnesium protoporphyrin IX methyltransferase, chloroplastic
AT1G20225	Q8W456	24.4396	25.6253	25.4614	26.0136	25.7316	25.8453	26.0105	26.7909	25.5175	25.6071	25.5175	25.4066	22.5818	23.7778	23.6994	2	2	19.3	19.3	26.052
AT5G16510	Q9FFD2	26.0913	25.9514	26.0937	25.7582	25.4767	25.4364	25.9606	25.694	25.9539	25.0812	25.3632	25.2284	24.3231	25.3507	24.5695	5	4	19.3	17.2	38.585	Probable UDP-arabinopyranose mutase 5
AT5G47810	Q9FIK0	23.8724	26.13	24.3489	26.1355	23.7551	26.058	26.1546	26.3601	26.0605	23.3146	25.9285	22.7819	24.4284	24.372	24.2265	5	4	14.6	12.6	49.182	ATP-dependent 6-phosphofructokinase 2
AT2G47400	O22914	23.1028	24.2831	23.2529	24.755	24.3728	23.4403	23.8896	23.2657	23.4587	26.2796	23.954	24.1812	26.5154	27.9131	26.8541	3	3	50	50	13.487	Calvin cycle protein CP12-1, chloroplastic
AT5G43960	Q9FND0	23.3503	23.2825	25.8065	22.1871	24.2153	23.7883	22.849	22.7234	26.8289	25.5559	25.4228	25.9589	26.762	26.0637	26.1492	5	5	23.1	23.1	50.122
AT3G55620	Q9M060	25.2331	25.0471	25.3914	25.3156	25.3151	26.0171	25.7695	25.6506	25.8794	25.6176	25.6546	25.6119	25.3052	25.1001	25.1889	5	5	46.1	46.1	26.482	Eukaryotic translation initiation factor 6-2
AT3G44750	F4J378	25.2084	24.8655	24.8971	23.6429	23.0885	23.8076	25.1681	23.872	24.5627	26.2517	26.8247	26.6937	25.8658	25.6293	26.2374	3	3	29.8	29.8	25.985	Histone deacetylase HDT1
AT1G77710	Q9CA23	24.0287	25.472	25.8285	23.9918	25.4791	25.7495	25.9225	25.7844	24.1264	26.0562	26.0581	26.0468	23.4578	24.9694	25.1898	3	3	66.7	66.7	9.9284	Ubiquitin-fold modifier 1
AT4G33670	O81884	26.1076	26.4603	26.0234	26.2276	25.7542	26.1114	25.5404	25.8376	25.757	24.02	24.252	25.5338	23.2251	23.8059	23.2504	5	5	35.1	35.1	34.531	L-galactose dehydrogenase
AT4G12060	Q8GW78	24.8923	23.1262	22.2805	24.4006	23.9512	22.4734	24.0935	24.2098	23.8502	25.0917	25.9806	25.5395	27.0968	27.163	27.262	5	5	38.6	38.6	26.56	Clp protease-related protein At4g12060, chloroplastic
AT5G11680	Q9LYG2	26.5993	25.5863	26.6277	24.6782	24.1802	25.6752	23.3678	23.4011	25.8072	23.6921	23.7118	23.5802	22.3997	23.7333	23.7372	4	4	25.1	25.1	23.106
AT1G07750	Q9LQQ3	26.6705	25.8274	25.7344	25.9731	22.6809	25.994	24.1868	26.1943	25.4925	25.4752	23.489	25.7048	22.9294	23.4877	23.9445	4	4	19.7	19.7	38.31
AT2G42590	F4IP53	22.0903	23.211	23.5412	26.2435	25.1251	22.865	25.7492	24.2794	23.3117	25.4975	25.4493	25.2808	26.2616	26.3642	27.0467	7	4	27.1	21.8	29.463	14-3-3-like protein GF14 mu
AT3G56910	Q9LER7	22.5193	23.2276	23.0532	24.4698	23.3765	23.0691	23.0689	24.6431	22.5877	23.6587	25.6507	23.5874	27.7441	27.5493	27.1163	1	1	10.8	10.8	16.361	50S ribosomal protein 5, chloroplastic
AT1G74230	Q9C909	26.4397	22.8676	23.1299	23.4707	25.9851	23.1951	23.8043	25.4445	23.9231	24.0279	24.2977	24.6355	26.6403	26.3919	26.3325	3	3	18.3	18.3	28.728	Glycine-rich RNA-binding protein 5, mitochondrial
AT2G34640	F4IHY7	23.6958	25.0578	23.3843	24.3425	24.0429	23.2082	23.3681	23.7505	23.6662	24.9354	25.2242	25.0469	26.6141	26.3829	26.0621	4	4	13.5	13.5	60.895
AT4G31480	Q9SV21	24.1416	25.7186	25.291	25.1705	25.957	23.3205	25.9781	26.0289	25.8281	26.167	25.7968	26.2387	23.3479	24.366	22.9549	3	3	5.2	5.2	106.14	Coatomer subunit beta-1;Coatomer subunit beta-2
AT2G43560	O22870	24.0928	24.0551	24.3702	23.6677	23.183	22.2316	23.5182	24.496	23.0333	24.7803	23.3091	24.4013	27.5737	27.8134	27.3942	7	7	44.8	44.8	23.564	Peptidyl-prolyl cis-trans isomerase FKBP16-3, chloroplastic
AT3G20820	Q9LT39	24.4942	23.3675	23.9385	22.9878	23.8507	23.1347	25.4394	23.169	25.3676	26.3421	25.8501	25.7527	26.3184	26.3865	26.7137	7	7	30.7	30.7	39.862
AT1G47420	Q9SX77	23.5255	23.8272	23.5775	24.261	26.3623	26.228	24.6153	24.4712	23.6554	25.8105	25.393	25.5568	26.2477	26.2056	26.1472	4	4	23	23	28.106	Succinate dehydrogenase subunit 5, mitochondrial
AT2G27040	Q9ZVD5	26.0796	25.7719	26.113	25.4512	25.548	25.5501	25.9955	25.853	26.3745	25.1988	25.0311	25.2264	23.2175	24.5888	23.3965	7	7	10.2	10.2	102.84	Protein argonaute 4
AT3G55430	Q9M2T6	23.8336	26.6085	22.5266	26.343	26.2429	26.3096	26.0711	23.1482	26.0196	23.5298	24.0916	24.6331	23.4092	24.1123	24.4222	2	2	7.1	7.1	48.442
AT2G02390	F4IQD1	23.5799	24.2272	23.9989	26.2743	26.0133	26.0222	25.7569	25.8935	26.1953	24.4444	25.1902	22.8804	24.6714	23.9373	23.1573	2	2	25.7	25.7	21.578	Glutathione S-transferase Z1
AT4G29830	Q9SZQ5	23.8364	25.4435	23.5218	23.5688	25.3152	24.9269	23.1422	23.3388	22.925	25.7412	25.6859	25.7948	26.7637	26.9171	26.0596	5	5	24.3	24.3	34.259	WD repeat-containing protein VIP3
AT5G53400	Q9LV09	24.8002	24.6678	24.1491	23.8927	23.7227	23.5442	25.4551	24.0054	23.6963	26.2127	25.9245	25.7312	26.5378	26.4372	26.5544	3	3	12.5	12.5	34.506	Protein BOBBER 1
AT2G43770	O22826	23.4989	25.2245	23.243	23.1937	23.105	23.3151	23.7264	24.4752	23.7214	25.9713	26.246	25.8892	25.8064	25.8923	25.9505	3	3	13.4	13.4	37.885
AT5G41520	Q9FFS8	23.6007	23.2459	24.0451	24.7655	24.7264	23.3787	24.206	23.9806	23.7712	26.6103	25.8999	26.2873	26.8986	27.0336	26.5148	5	5	31.7	31.7	19.733	40S ribosomal protein S10-2
AT5G48580	Q38936	24.0248	23.7045	23.8427	24.3544	22.567	21.9965	24.0976	24.2041	23.2869	25.5982	25.148	25.7402	27.2619	27.0284	26.9885	3	3	16.6	16.6	17.658	Peptidyl-prolyl cis-trans isomerase FKBP15-2
AT3G14220	Q9LJP2	23.5284	23.7856	23.2947	23.4099	22.4406	22.891	24.8707	23.6719	22.2606	26.6976	26.6753	26.3214	26.5482	25.7969	26.697	5	4	19.3	17.1	40.248	GDSL esterase/lipase At3g14220
AT5G60790	Q9FJH6	23.8366	24.847	23.1126	23.4486	25.0312	23.4422	25.7518	25.846	25.6054	26.5965	26.7265	25.3403	24.7964	26.1341	25.7319	6	6	12.9	12.9	66.885	ABC transporter F family member 1
AT2G39080	Q8VZB1	26.4071	24.4308	24.0556	23.8075	23.9359	22.8838	23.9881	23.661	23.143	26.2913	26.152	22.8107	26.7469	26.9344	27.1178	3	3	12.5	12.5	38.21
AT1G29900	Q42601	24.4472	23.4946	24.3125	24.979	23.6785	24.5875	25.9694	26.4578	25.8663	26.4481	26.3161	26.3299	25.4978	23.0191	25.2106	7	7	8	8	129.96	Carbamoyl-phosphate synthase large chain, chloroplastic
AT5G58490	Q9FGH3	22.9793	23.1148	26.2469	23.7062	23.3622	26.4315	25.8973	26.0755	25.8859	24.5556	24.7501	25.3882	24.0345	24.5449	23.9907	4	4	14.5	14.5	35.757
AT5G17820	Q43729	22.8609	23.0245	24.908	23.2333	24.0716	22.9005	25.1287	23.973	24.0902	26.1529	26.3582	26.1965	26.6384	26.8209	27.0916	6	6	37.7	37.7	34.098	Peroxidase 57
AT1G12900	Q9LPW0	23.1631	22.9589	24.8263	25.3087	26.3589	26.0997	25.824	23.2538	25.0776	22.4014	23.7836	24.6705	26.3808	26.1351	25.5701	14	4	52.3	27.1	37.667	Glyceraldehyde-3-phosphate dehydrogenase GAPA2, chloroplastic
AT4G38710	Q9SZP8	23.9725	24.0571	24.0296	23.8345	23.9124	23.3251	25.3342	25.7777	25.5843	25.9004	26.3353	26.6174	25.8146	25.939	25.7614	5	5	23.5	23.5	48.987
AT4G09670	Q9SZ83	25.5147	25.6614	25.5597	23.4014	25.5911	25.4522	25.6403	25.4168	25.6028	25.6832	25.0649	25.7489	24.7689	24.7798	23.4128	5	5	30.1	30.1	39.562	Uncharacterized oxidoreductase At4g09670
AT5G64250	Q8LDF2	26.0754	25.7354	25.7576	25.9183	25.7787	25.3061	25.4266	25.6375	25.1534	25.3185	25.0547	25.0093	25.3178	22.3841	23.1818	5	5	31.1	31.1	32.09
AT3G02520	A0A178VJ06	23.4833	26.6911	25.1286	23.4649	25.49	26.0861	25.7821	24.8516	25.112	24.7674	24.9144	23.78	25.5146	25.3379	25.907	14	3	63.8	15.8	29.824	14-3-3-like protein GF14 nu
AT1G49670	Q9FX95	24.3935	23.5759	24.9088	24.8551	22.9592	25.2308	25.239	23.8031	25.2633	27.072	25.7601	26.4095	23.8597	23.8777	25.809	4	4	10.5	10.5	67.943
AT3G58730	Q9XGM1	25.0251	25.5941	25.3836	24.7325	25.8487	25.7912	25.8811	25.4896	23.485	24.9731	25.361	25.8443	24.9837	24.86	25.2159	6	6	27.2	27.2	29.058	V-type proton ATPase subunit D
AT1G09340	Q9SA52	23.7067	24.3783	24.1005	23.876	24.1457	23.1293	22.3571	23.7855	23.9542	23.173	25.0835	22.9861	27.5951	26.908	27.553	9	9	38.6	38.6	42.619	Chloroplast stem-loop binding protein of 41 kDa b, chloroplastic
AT3G52750	A0A178V810	23.5032	23.0343	22.7473	22.2722	24.8708	23.6121	23.519	23.3203	23.4714	25.7591	25.8793	24.1369	27.697	27.2524	26.3828	7	4	27.7	16.3	50.317	Cell division protein FtsZ homolog 2-2, chloroplastic
AT5G04885	Q0WNW0	26.3575	26.5966	26.4638	26.1411	26.4743	26.4011	25.7569	23.273	24.9368	23.6567	24.1893	23.9587	22.9691	24.5774	23.0284	3	3	7.1	7.1	72.303
AT4G05180	Q41932	24.8092	23.7284	24.0949	24.3657	24.2533	23.5718	22.8414	22.9939	23.1954	24.492	23.1989	23.87	27.5014	27.4047	27.0876	5	5	28.3	28.3	24.643	Oxygen-evolving enhancer protein 3-2, chloroplastic
AT2G25890	Q494N8	25.4614	27.2583	25.7705	26.4474	25.549	24.9185	26.1293	24.6745	25.7012	24.8937	23.1331	24.2611	23.2586	23.8768	23.1287	3	3	25.5	25.5	16.137	Oleosin
AT4G12730	Q9SU13	23.6592	23.9922	23.2939	22.8302	24.4646	23.8974	23.7404	22.6269	23.8094	24.2939	26.806	23.0526	26.9375	27.0974	26.9992	5	5	26.1	26.1	43.448	Fasciclin-like arabinogalactan protein 2
AT3G02870	B3H749	24.3562	24.2792	25.4094	25.3211	25.6789	23.8078	25.433	25.3454	25.413	25.5917	25.1654	25.4782	25.1778	23.2034	25.5883	4	4	29.5	29.5	28.806	Inositol-phosphate phosphatase
AT4G25340	F4JSK5	23.3554	23.9368	25.1793	23.3275	23.8534	24.9598	25.6348	25.8261	25.6119	26.0348	25.9596	25.9634	25.4907	25.2989	25.5253	3	3	12.4	12.4	48.978	Peptidyl-prolyl cis-trans isomerase;Peptidyl-prolyl cis-trans isomerase FKBP53
AT1G03600	Q9LR64	23.9508	24.3096	23.5386	23.5392	22.9676	24.0018	23.9093	23.9526	23.315	23.7494	23.7884	26.3412	26.363	27.7339	27.4001	4	4	27.6	27.6	18.834	Photosystem II repair protein PSB27-H1, chloroplastic
AT1G80460	F4HS76	24.4568	24.1383	23.4369	23.2342	24.4803	24.3386	23.6375	23.558	23.4142	26.1867	26.3958	26.7604	26.2325	26.4219	26.4997	8	8	23.2	23.2	52.483	Glycerol kinase
AT1G02930	P42760	24.2657	24.5714	22.8978	23.5208	24.8329	25.0698	23.5815	24.5191	23.1232	24.7333	23.7047	26.2827	27.644	27.2825	26.9449	6	3	48.6	32.2	23.486	Glutathione S-transferase F6
AT3G03320	Q9SRN6	25.6487	25.5688	26.5365	26.0879	26.3274	25.7564	25.6348	25.3227	25.2241	25.0053	22.9114	25.2968	23.3	23.8044	24.4374	4	4	29.5	29.5	27.118
AT3G05600	A0A1I9LQ19	25.3983	25.1256	25.5425	24.7996	25.3663	25.5417	25.2021	25.0667	25.2799	25.0934	25.4293	25.3052	23.1593	24.9042	24.9496	4	4	23	23	27.286
AT5G47720	F4JYM8	24.2857	25.3506	25.2311	24.9943	24.9405	27.5342	25.0691	25.0109	25.0094	24.8356	24.7743	24.0606	23.2032	24.3121	24.8249	7	7	34.2	34.2	42.981	Probable acetyl-CoA acetyltransferase, cytosolic 2
AT2G37970	F4IRX7	24.9842	25.6907	25.8241	26.6974	25.5659	25.4894	23.908	23.736	25.5978	25.3004	23.2474	25.1092	23.1083	24.6664	25.2313	3	3	14.7	14.7	24.925
AT1G01470	O03983	25.9846	25.9571	25.7391	25.9616	25.8361	25.819	25.3679	22.272	25.7671	23.5229	24.7523	23.3732	23.9191	23.6479	23.0406	4	4	41.1	41.1	16.543	Probable desiccation-related protein LEA14
AT4G15410	Q7Y175	23.9266	23.5808	25.1445	25.4283	23.3137	25.0672	25.2096	23.0701	25.2081	25.6881	25.8499	25.9504	26.1663	23.7642	25.7624	4	4	12.4	12.4	44.996	Plant UBX domain-containing protein 5
AT3G19760	Q94A52	25.73	23.6172	23.4714	23.8101	25.0759	25.2771	25.0401	25.5531	25.5255	25.6467	25.6175	25.6444	25.0727	25.56	25.5513	5	4	17.6	15.2	45.844	DEAD-box ATP-dependent RNA helicase 2
AT5G65165	Q9FJP9	23.581	25.2587	25.2835	23.958	26.6392	25.4794	26.5898	25.4506	26.5236	23.7104	24.4466	24.5442	23.7909	23.9964	23.5732	4	4	21	21	34.983	Succinate dehydrogenase [ubiquinone] iron-sulfur subunit 3, mitochondrial
AT1G80480	Q9M8L6	23.0487	23.9476	23.553	22.5528	24.7793	23.4005	24.2009	23.2779	25.0933	25.6381	26.4641	25.7677	26.3088	26.4748	26.5004	7	7	20.3	20.3	49.487
AT1G62660	Q43348	24.3706	22.4677	22.107	24.4789	24.0828	23.1918	22.6885	23.7155	24.1883	26.7677	24.2672	24.6932	27.1596	27.0682	27.2584	7	6	18.8	17.1	72.227	Acid beta-fructofuranosidase 3, vacuolar
AT5G10730	Q93VH5	24.048	24.478	25.5696	25.135	23.6486	25.3443	25.6209	25.4941	25.6865	25.6481	25.4123	24.8781	22.067	24.4578	24.1788	2	2	12.5	12.5	31.044
AT2G42500	F4IN36	25.5503	23.4108	24.1678	24.3838	24.5868	23.8158	25.7796	24.4173	25.7499	26.2329	25.963	26.1675	25.3634	25.2391	25.4068	2	2	12.8	12.8	30.653	Serine/threonine-protein phosphatase;Serine/threonine-protein phosphatase PP2A-4 catalytic subunit;Serine/threonine-protein phosphatase PP2A-3 catalytic subunit
AT2G35010	O64764	23.3402	24.6282	23.1926	23.6318	23.4758	23.421	24.1864	24.3914	22.7893	25.8742	25.6726	25.7378	25.889	26.1974	26.0217	4	4	28.4	28.4	21.191	Thioredoxin O1, mitochondrial
AT1G50200	F4I4Z2	24.9921	25.1132	24.2744	25.1761	25.0619	26.1313	25.6513	25.1446	25.5767	26.0525	25.6338	25.6179	24.6073	24.6289	25.0434	10	10	19	19	106.01	Alanine--tRNA ligase
AT4G27320	Q8L4N1	24.1921	23.1358	23.9269	22.4009	23.9779	23.2586	22.1471	25.3293	25.8557	25.9009	25.223	25.6054	26.0135	25.4285	25.9072	5	4	34	26.3	27.919
AT1G36730	Q9C8F1	24.6882	24.9539	25.2643	24.8496	24.5988	25.4534	25.002	24.9875	24.8404	25.3464	25.7135	24.9923	25.9428	25.7168	25.442	5	5	13	13	48.622	Probable eukaryotic translation initiation factor 5-1;Probable eukaryotic translation initiation factor 5-2
AT3G26618	P35614	23.5519	23.5744	23.653	24.1392	23.5929	22.9162	23.399	24.754	24.9956	26.1085	26.1521	25.8806	26.4588	26.6629	26.1861	6	2	15.6	5.3	49.007	Eukaryotic peptide chain release factor subunit 1-3
AT3G52300	Q9FT52	23.6646	23.1641	23.0451	23.986	22.9491	23.4745	23.9093	24.1702	22.8301	26.345	25.8812	24.0791	27.4174	26.5129	26.0541	6	6	41.7	41.7	19.586	ATP synthase subunit d, mitochondrial
AT5G14800	P54904	23.6587	23.899	23.6347	25.1451	24.5262	23.997	24.9847	23.3535	23.3071	25.7767	25.7674	26.1066	26.3832	26.5637	26.5759	4	4	21.4	21.4	28.624	Pyrroline-5-carboxylate reductase
AT4G34350	Q94B35	23.4432	22.731	22.6398	25.3401	23.6477	24.4222	23.7388	23.3145	23.9905	23.676	24.0141	23.7939	27.1493	27.2864	27.0614	7	7	23.6	23.6	52.78	4-hydroxy-3-methylbut-2-enyl diphosphate reductase, chloroplastic
AT4G18040	O23252	23.564	23.7112	24.3087	24.4478	23.8007	22.6777	23.1858	24.8285	23.2256	25.4521	26.1557	25.2699	26.3155	26.3629	25.9318	2	2	14.5	14.5	26.519	Eukaryotic translation initiation factor 4E-1
AT5G65110	O65201	24.471	24.432	23.1224	24.2559	23.4871	23.1638	25.6971	25.204	25.5574	26.7423	26.3875	26.1387	24.7673	25.0728	25.1233	8	8	12.6	12.6	77.479	Acyl-coenzyme A oxidase 2, peroxisomal;Acyl-coenzyme A oxidase
AT3G57890	Q940S9	23.774	25.4925	26.295	23.6049	25.6629	23.7419	26.4057	24.529	26.5511	24.6551	24.214	24.689	24.1807	24.0423	24.5387	3	3	9.6	9.6	62.778
AT1G56700	Q9FXC0	23.964	23.0108	23.5145	23.8507	23.369	24.1231	23.6388	24.1748	23.6046	26.3252	26.1608	26.6009	25.958	26.4665	26.5628	6	5	39.7	34.2	24.046
AT1G09270	O80480	24.9394	25.2109	24.8428	23.4333	22.2707	23.9727	24.9716	22.5162	25.0741	25.8824	25.6949	25.7884	25.4202	25.5441	25.5447	4	3	13.2	10.7	50.078	Importin subunit alpha-4
AT1G18500	Q9LPR4	23.3916	23.697	24.8862	23.7504	23.9806	24.08	24.8851	23.4874	25.7203	26.1054	25.6436	26.2483	26.0233	26.2644	25.986	6	2	11.6	4.4	68.675	2-isopropylmalate synthase 1, chloroplastic
AT4G01700	Q9ZSI6	22.8916	24.0876	23.4174	23.8037	21.801	24.7019	24.4183	23.654	22.9247	26.6374	26.3296	26.1702	26.4808	26.4667	26.1641	6	6	26.4	26.4	31.464
AT4G24620	Q8H103	25.5285	25.3914	25.8159	26.4215	25.7936	26.403	24.3376	24.8113	25.3455	24.9388	24.8093	24.0692	25.1227	23.7274	23.6272	5	5	16.1	16.1	62.307	Glucose-6-phosphate isomerase 1, chloroplastic
AT3G44990	P93046	25.2715	23.6833	23.89	23.9134	23.7854	24.6483	23.0973	23.4545	23.3968	26.2345	26.3218	26.081	26.1488	26.1992	26.1883	4	4	18.4	18.4	33.54	Xyloglucan endotransglucosylase/hydrolase protein 31
AT1G62390	O48802	22.7114	23.5757	23.4032	22.6831	25.3249	23.4036	24.4055	22.4968	22.7605	25.7357	26.8525	26.2644	26.0421	25.5213	26.1844	6	6	21.2	21.2	82.707
AT3G15660	Q8LBK6	23.4144	24.9387	22.7187	23.7511	23.7789	22.8575	23.8635	24.8819	24.0389	25.6751	26.2541	25.7818	26.1097	26.5144	26.2024	3	3	24.9	24.9	18.734	Monothiol glutaredoxin-S15, mitochondrial
AT3G56240	A0A178V898	24.2916	24.2327	24.214	24.4833	23.4595	23.6122	24.2503	23.7082	23.3173	22.3572	24.7333	23.7134	27.2523	27.1057	27.1671	4	4	45.5	45.5	12.971	Copper transport protein CCH
AT2G25280	Q9SIR5	25.4934	25.8581	25.7653	25.7385	25.7577	25.5428	25.5075	25.5706	25.1011	24.5717	23.6431	25.3078	23.0335	24.897	25.5099	4	4	22	22	32.644
AT2G35410	O82299	23.3713	24.5346	22.914	24.2649	23.8779	22.9455	22.5894	24.5174	24.4605	24.1038	24.3261	26.1113	27.0164	27.0273	27.1374	6	6	25.6	25.6	33.785
AT5G03940	P37107	24.3374	24.1469	24.9454	22.7451	23.4994	23.683	22.8518	23.9914	24.7987	24.6097	25.6141	27.3723	26.4123	26.8721	25.6938	11	11	27.8	27.8	61.232	Signal recognition particle 54 kDa protein, chloroplastic
AT1G12270	Q9LNB6	23.6159	24.1738	22.7195	24.281	23.2472	21.9149	22.9342	23.1619	23.9922	25.9581	26.0285	25.0227	26.4669	26.3503	26.4427	10	8	33.6	28.8	64.584	Hsp70-Hsp90 organizing protein 1
AT1G03220	Q9ZVS4	23.8408	24.213	23.3641	24.9833	25.2179	24.2709	25.9157	23.4196	26.5058	25.6067	24.4462	24.9881	25.7586	25.4471	24.6413	8	5	30.7	21.9	45.717
AT5G51750	Q9FLI4	23.7478	23.8913	23.2736	24.7477	23.0071	24.1125	23.6882	23.5497	25.3996	26.1738	25.7517	26.0683	26.3645	25.61	26.6577	4	4	7.2	7.2	84.949
AT5G12950	Q9LXU4	26.1907	24.6009	23.7472	23.5827	24.9722	21.9633	25.7441	25.9858	25.1652	25.3522	24.3162	25.3792	22.7831	24.6087	23.9128	5	5	12.3	12.3	96.235
AT5G63570	P42799	23.5338	24.1467	23.6758	23.8784	24.3048	24.3673	24.6842	23.3133	23.5184	25.7219	25.658	25.6913	26.91	26.9082	26.754	16	6	53	22.6	50.369	Glutamate-1-semialdehyde 2,1-aminomutase 1, chloroplastic
AT5G13850	Q6ICZ8	23.8338	23.354	23.3924	22.8934	23.4758	24.0383	23.6276	24.28	23.57	26.1621	25.9496	26.1768	25.8447	26.007	25.8662	6	2	34.3	15.7	22.057	Nascent polypeptide-associated complex subunit alpha-like protein 3
AT3G24503	Q56YU0	25.3713	23.5267	22.9714	23.7789	25.3786	26.6583	25.5014	24.6141	24.3237	25.3551	24.8834	22.8313	24.9434	25.9439	24.6852	7	7	26.7	26.7	54.36	Aldehyde dehydrogenase family 2 member C4
AT1G55020	Q06327	25.3657	24.5258	23.8278	25.1748	25.354	24.4476	23.2656	24.1464	23.7855	26.4792	26.0456	26.3708	26.395	23.8516	22.3217	6	6	10.7	10.7	98.044	Linoleate 9S-lipoxygenase 1
AT5G41210	Q9ZRT5	26.4021	23.1908	25.2232	25.2127	24.1339	26.0563	22.8829	23.0116	23.5207	23.903	24.4254	23.0828	26.1123	25.7294	25.87	7	7	50.6	50.6	27.653	Glutathione S-transferase T1
AT5G14910	Q93VK7	24.7673	24.0661	24.3877	23.7499	24.6143	24.1277	23.5255	23.5298	24.2713	22.7497	23.2038	25.2295	27.6912	27.0875	27.0944	3	3	27.5	27.5	18.956
AT4G04640	Q01908	25.5138	24.9006	24.5551	23.3316	24.3272	23.0513	23.2034	23.3519	23.4357	23.5374	26.4679	24.825	26.5972	26.7733	26.3001	4	4	16.9	16.9	40.911	ATP synthase gamma chain 1, chloroplastic
AT5G54900	Q9FPJ8	23.5065	23.8539	24.2888	25.215	23.8184	24.0129	26.8858	26.106	24.6551	25.3113	25.2552	25.3852	24.1298	23.1708	24.0201	6	6	21.7	21.7	42.323	Polyadenylate-binding protein RBP45A
AT2G21270	Q9SJV0	24.1989	25.4421	25.2155	24.0559	25.3494	25.3616	25.5285	25.4168	25.7143	25.7172	25.4696	24.0497	24.1657	23.6113	23.635	3	2	12.2	9.4	35.323
AT3G17170	Q948R9	24.0822	24.652	23.3448	24.3092	23.8823	22.6523	23.814	23.8509	23.3715	25.6926	25.8434	25.7865	26.8006	26.7056	26.6917	2	2	9.6	9.6	36.275
AT5G38430	P10796	23.9013	25.4961	24.3914	24.0459	24.0252	23.4712	23.8768	23.7783	23.8639	24.8296	25.1461	26.5058	27.3038	27.0906	26.8282	19	4	64.1	23.8	20.286	Ribulose bisphosphate carboxylase small chain 1B, chloroplastic
AT1G79500	Q9AV97	25.4063	24.8502	25.4383	25.3167	25.3531	25.0604	25.417	24.9964	25.1773	24.7532	25.4974	24.8466	24.2863	24.1327	24.6405	5	3	23.8	15.2	31.656	2-dehydro-3-deoxyphosphooctonate aldolase 1
AT1G02920	Q9SRY5	24.39	24.0413	23.6889	24.2416	24.1792	23.3423	23.313	25.1646	23.0876	24.9936	25.3799	25.219	27.3649	26.7671	26.6996	7	4	45	28.7	23.598	Glutathione S-transferase F7
AT4G02620	Q9ZQX4	22.4369	23.5095	25.2796	21.8705	23.6007	24.5154	23.3395	24.4982	25.1093	25.4824	25.6247	23.4976	26.0446	26.0065	25.727	4	4	55.5	55.5	14.259	V-type proton ATPase subunit F
AT5G13370	Q8GZ29	25.3352	25.1796	24.9172	25.7792	25.4533	25.8267	25.2058	25.5164	25.3823	25.0114	25.0431	23.9583	23.8324	24.742	24.7894	5	5	13.3	13.3	66.978
AT1G20200	Q9LNU4	25.204	24.956	25.2501	23.8684	25.2401	25.034	25.6012	25.4583	25.5002	25.6643	25.3545	25.5579	23.7741	23.0619	24.7064	5	5	16	16	55.582	26S proteasome non-ATPase regulatory subunit 3 homolog A
AT1G30630	Q9SA78	24.4584	23.4674	24.3771	24.7532	23.7503	24.7731	25.7645	25.73	23.4168	26.3754	26.2248	25.4502	25.7501	24.769	25.0926	5	5	37.3	37.3	32.602	Coatomer subunit epsilon-1
AT1G12410	Q9XJ36	23.1703	23.7346	23.9652	24.152	24.7993	24.3843	25.0509	23.4792	23.6585	25.9222	25.984	26.4631	25.9531	26.602	26.1971	5	5	29.4	29.4	31.208	ATP-dependent Clp protease proteolytic subunit-related protein 2, chloroplastic
AT1G21670	Q9XI11	23.1903	25.8319	23.8515	23.5158	25.9141	25.7294	24.308	23.7141	23.6459	23.8863	23.5476	23.7346	26.0071	25.6051	25.749	5	5	11.8	11.8	77.288
AT2G21530	Q8GWP4	24.0887	24.1761	23.5674	23.0722	23.2802	23.5713	23.4902	24.8062	23.7217	24.9536	24.6333	24.4746	27.2275	27.0048	26.5432	5	5	39.2	39.2	22.675
AT2G18570	Q9ZU72	25.269	26.2191	25.6439	25.7565	25.1664	25.9932	25.6348	25.4102	25.9397	24.801	23.5558	23.7231	24.536	24.0965	24.1086	6	5	26.6	24.3	51.912	UDP-glycosyltransferase 72D1
AT1G47200	Q9C500	22.4205	23.4942	22.5127	24.9045	25.3623	23.3379	24.362	23.462	24.5186	22.1333	25.9249	26.0496	25.3902	26.0942	26.0289	2	2	23.3	23.3	19.134	WPP domain-containing protein 2;WPP domain-containing protein 1
AT2G42520	Q84W89	23.4881	23.7806	23.504	24.742	23.64	23.4403	25.0443	25.6434	26.0511	26.1756	25.369	26.3954	23.6864	23.8903	24.5283	5	5	12.5	12.5	67.625	DEAD-box ATP-dependent RNA helicase 37;DEAD-box ATP-dependent RNA helicase 11;DEAD-box ATP-dependent RNA helicase 52
AT5G49650	Q949W8	25.0237	25.152	25.0144	25.2068	25.4089	24.9805	24.9933	25.3006	24.9739	24.8615	25.0131	24.8852	23.2745	24.5786	23.8198	5	5	11.5	11.5	61.294
AT2G33040	Q96250	24.2477	25.9525	25.0805	26.309	25.093	25.4778	23.475	24.1182	25.3768	23.4519	25.6008	25.6248	23.5361	23.289	25.2725	8	8	42.2	42.2	35.448	ATP synthase subunit gamma, mitochondrial
AT1G66070	Q9C8D8	24.8058	24.4964	24.123	25.0599	23.7355	24.9825	24.9225	24.9945	24.9934	25.3833	26.6691	25.0864	24.7034	22.9409	23.4473	2	2	14.6	14.6	25.507	Eukaryotic translation initiation factor 3 subunit J
AT5G19150	Q94AF2	25.2004	25.2439	25.567	25.5642	24.5239	25.3585	25.7024	25.7199	25.5303	25.0629	22.984	25.3394	23.7376	24.7447	23.5446	3	3	14.8	14.8	39.269	ATP-dependent (S)-NAD(P)H-hydrate dehydratase
AT1G53070	Q9LNN2	25.6751	24.4022	23.1018	25.4972	25.6485	24.4383	22.9034	24.8231	23.8145	24.0871	23.3485	24.4345	22.6579	23.687	23.2693	4	4	16.5	16.5	30.378	Lectin-like protein At1g53070
AT1G78570	Q9SYM5	23.4954	23.5469	24.1371	24.3235	23.7488	23.6012	23.7067	24.7855	23.6121	25.8313	26.1495	26.4283	25.3794	26.1597	25.5554	9	5	25.4	18.8	75.371	Trifunctional UDP-glucose 4,6-dehydratase/UDP-4-keto-6-deoxy-D-glucose 3,5-epimerase/UDP-4-keto-L-rhamnose-reductase RHM1;UDP-glucose 4,6-dehydratase;UDP-4-keto-6-deoxy-D-glucose 3,5-epimerase/UDP-4-keto-L-rhamnose 4-keto-reductase
AT2G44920	O22160	22.7753	23.7835	23.4795	23.695	23.9658	24.127	22.7753	24.9637	23.8124	23.5273	22.8411	23.5852	27.358	27.2598	27.2203	4	4	30.8	30.8	23.778	Thylakoid lumenal 15 kDa protein 1, chloroplastic
AT5G66420	Q94JM0	24.8144	25.4407	25.7148	25.354	24.976	25.5284	25.2426	25.2755	25.5506	24.7909	24.8016	24.5879	24.2817	23.3166	24.5153	5	5	14.4	14.4	70.032
AT2G27030	F4IVN6	22.5188	23.6106	23.7959	23.7134	24.3005	23.1414	24.4543	23.1376	24.7557	24.1006	23.7842	26.9167	26.4735	27.1337	25.4007	6	1	37.6	16.6	20.576	Calmodulin-5;Calmodulin-6;Calmodulin-7;Calmodulin-3;Calmodulin-2
AT3G54960	Q8VX13	23.9055	24.5667	23.0084	23.9857	23.0077	22.9706	24.8149	23.4614	23.7535	25.7458	25.664	26.2428	26.1439	26.2892	26.0725	6	6	16.6	16.6	64.211	Protein disulfide isomerase-like 1-3
AT1G79930	Q9S7C0	25.12	24.22	24.32	24.0936	23.9112	24.2188	25.0765	23.7229	25.3497	25.6125	26.0408	25.5015	23.5726	23.5802	24.1155	25	2	43.1	4.7	87.316	Heat shock 70 kDa protein 14
AT3G55010	Q05728	24.2502	23.999	25.0598	23.7542	23.8632	22.8045	23.4519	26.1477	26.0708	24.7072	25.4693	25.4301	25.4923	25.6115	25.7931	4	4	24.7	24.7	41.504	Phosphoribosylformylglycinamidine cyclo-ligase, chloroplastic
AT5G20250	F4K470	24.5474	23.3438	23.6003	23.0183	24.0012	24.5265	25.3619	22.9729	22.3166	26.829	26.7949	26.9357	23.2846	23.8836	22.8157	7	7	11.8	11.8	94.215	Probable galactinol--sucrose galactosyltransferase 6
AT5G09660	F4KDZ4	23.1235	22.7213	24.124	24.6311	23.4639	23.4614	24.4527	24.9716	24.1142	24.2172	24.704	25.5759	27.0725	26.8439	26.7722	8	7	41.1	37.5	34.975	Malate dehydrogenase;Malate dehydrogenase, glyoxysomal
AT2G21870	F4III4	24.3163	24.4376	24.0404	24.1303	24.4183	24.4614	23.383	22.8854	24.7887	25.9439	26.1733	25.6568	26.7724	26.5999	25.6737	7	7	30	30	25.16	Probable ATP synthase 24 kDa subunit, mitochondrial
AT5G26710	O82462	25.5488	24.833	25.5192	23.6967	25.5095	25.1516	25.945	26.0848	23.4117	25.031	24.8077	25.5736	22.8392	23.248	22.8005	4	4	9	9	81.064
AT5G19820	Q93VS8	24.4825	23.8557	22.8817	22.9501	24.1686	24.3355	25.9955	26.2963	25.9542	26.4209	26.4052	23.1967	23.0584	23.6447	24.9989	6	6	8.8	8.8	123.82
AT3G51840	Q96329	24.006	24.1843	24.4207	24.2905	23.3126	24.1659	24.7518	24.3659	23.4351	26.6454	26.3881	26.7049	24.5765	23.2972	23.2548	7	7	27.5	27.5	47.556	Acyl-coenzyme A oxidase 4, peroxisomal
AT1G01320	F4HS98	23.5808	23.6317	24.0711	23.3719	24.0213	23.8664	24.0205	23.1504	23.8487	25.6044	26.3919	26.5094	26.0874	26.2186	25.9931	11	10	10.5	10	197.5
AT5G34850	Q949Y3	25.3069	23.5944	24.2231	23.7282	25.0403	24.1164	22.5861	24.1552	25.1592	23.382	26.0808	23.8509	26.6457	26.5334	26.4165	8	8	28.6	28.6	55.009	Bifunctional purple acid phosphatase 26;Acid phosphatase;Peroxidase
AT1G06130	Q8LDW8	24.1303	23.5062	25.5874	23.611	25.9513	25.1592	23.4412	25.4802	25.3922	25.126	25.316	25.2387	23.1359	24.2	25.2183	4	4	20.3	20.3	36.496	Probable hydroxyacylglutathione hydrolase 2, chloroplast
AT4G19006	Q8GYA6	24.8662	24.8989	24.8406	23.909	24.0295	23.6823	25.705	25.3916	25.209	25.4651	25.4296	25.3381	24.8546	24.6886	24.4821	5	3	18.1	13	44.02	26S proteasome non-ATPase regulatory subunit 13 homolog B
AT5G23140	Q9FN42	24.346	24.9273	25.0944	24.5197	25.1666	23.6307	25.673	25.517	25.6049	24.6674	24.9599	25.2635	25.3736	25.4997	25.163	4	4	28.2	28.2	26.283	ATP-dependent Clp protease proteolytic subunit 2, mitochondrial
AT4G10450	Q9SZX9	23.1557	24.3714	23.5498	23.2086	23.9505	24.1123	25.9271	23.958	23.8304	26.6922	24.2131	23.7774	25.0116	25.3267	24.9367	9	6	55.2	45.4	21.973	60S ribosomal protein L9-2
AT2G43710	F4IS32	25.0289	25.1851	25.0748	25.0554	24.9297	23.9301	24.0855	23.1734	24.8993	25.2825	25.1541	25.3844	25.5079	25.3873	25.6338	5	4	22.7	19	45.65	Acyl-[acyl-carrier-protein] desaturase;Acyl-[acyl-carrier-protein] desaturase 7, chloroplastic
AT5G18100	Q9FK60	23.8177	25.6699	23.0224	25.1811	24.3385	24.2548	23.8748	23.8478	24.5336	25.4987	25.0081	24.9489	25.866	23.211	25.6546	4	3	28.7	28.7	16.941	Superoxide dismutase [Cu-Zn] 3
AT4G39150	Q9T024	24.1788	23.2826	22.4927	24.2676	24.2508	22.7909	25.8504	23.6517	23.5644	22.9961	24.3734	23.2144	26.0584	25.9214	25.8124	6	6	28.7	28.7	38.461
AT2G14260	F4IFH2	25.379	24.0897	25.6274	25.2152	24.8924	22.1905	25.2133	25.2855	23.2756	23.3396	23.5381	25.1398	25.0824	25.1349	25.102	5	5	22.2	22.2	37.433	Proline iminopeptidase
AT2G35840	Q9SJ66	23.6175	23.4218	24.5288	23.6669	25.3314	23.8079	24.0735	23.7699	24.4883	24.0483	22.5482	23.5835	25.2379	25.6635	24.8126	5	5	18	18	47.855	Probable sucrose-phosphatase 2
AT1G16880	Q9FZ47	24.3237	24.9912	22.2028	23.4378	23.8334	24.6176	24.1577	22.5577	23.9607	24.1512	24.2371	24.6924	26.3915	27.2028	27.2313	4	4	20	20	31.294	ACT domain-containing protein ACR11
AT2G07698	F4IMB5	24.185	23.2918	24.4537	23.1109	22.6586	23.0821	23.8622	22.6906	24.2975	24.0867	23.5206	25.9208	26.1466	26.0068	26.2281	19	2	27	1.4	85.932	ATP synthase subunit alpha
AT4G34490	O65902	25.3111	25.4356	25.3007	24.0988	23.6062	25.1204	25.0105	25.0046	22.5396	25.5345	25.225	25.2245	23.4396	25.2306	24.4931	5	5	16.2	16.2	50.969	Cyclase-associated protein 1
AT4G24800	Q8W4Q4	23.4524	23.7057	23.8093	25.6843	25.3053	25.2836	25.4457	25.751	25.536	24.8998	23.6356	24.1638	24.6879	23.2735	23.294	7	7	20.1	20.1	77.435
AT5G08260	Q9LEY1	25.8852	24.2424	22.8676	22.262	22.8028	23.0973	24.867	24.5015	24.9855	24.6543	25.4671	25.5158	25.6173	25.913	25.6059	4	4	18.1	18.1	53.607	Serine carboxypeptidase-like 35
AT1G04850	Q9MAT3	23.8316	24.0156	22.8511	23.4173	24.226	23.8001	24.0692	23.6356	23.308	25.0546	23.0819	24.2549	26.6743	26.6915	26.4858	5	5	20.1	20.1	46.603
AT2G04400	P49572	22.7894	23.3222	24.3237	24.9781	24.4442	24.7442	23.1717	23.4402	24.9649	25.2513	25.7749	25.4742	25.4912	25.6873	25.8786	4	4	14.9	14.9	44.577	Indole-3-glycerol phosphate synthase, chloroplastic
AT1G28200	Q9SE96	25.6273	23.812	25.0285	22.1332	24.1411	24.0147	24.4196	24.6694	25.9472	24.0097	23.462	24.8368	25.8672	25.7232	25.5522	3	3	18.5	18.5	27.958	GEM-like protein 1
AT4G26500	Q84W65	23.0148	24.1619	23.0917	23.5111	24.8629	23.4861	24.079	24.2188	23.4102	23.1455	23.4711	26.2137	27.1442	26.5056	26.9353	7	7	31.5	31.5	40.833	SufE-like protein 1, chloroplastic/mitochondrial
AT2G17265	Q8L7R2	24.4165	24.3873	24.5154	25.9941	24.0017	25.9532	25.5725	23.3334	23.1863	25.6788	25.3341	24.7098	25.0591	24.6223	24.7291	4	4	21.4	21.4	38.528	Homoserine kinase
AT1G80410	Q8VZM1	24.5111	23.3838	24.0669	23.0605	23.5092	23.1485	25.9672	25.7165	25.7456	25.5026	25.3081	25.4675	23.127	25.409	25.3279	8	8	13.4	13.4	102.15
AT5G13630	A8MR05	23.9641	25.2883	23.7095	24.9048	24.604	24.3438	23.8573	23.9799	24.6515	22.2834	24.9099	24.1215	27.1422	26.9861	27.2783	3	3	4.1	4.1	139.99	Magnesium-chelatase subunit ChlH, chloroplastic
AT4G38350	F4JTN0	25.1349	23.9861	25.3707	25.9296	25.8178	24.8129	25.5014	25.5093	25.5191	24.5747	24.2619	24.3404	23.963	22.9609	23.6725	2	2	2.1	2.1	139.97
AT1G76180	P42763	23.4113	24.6653	22.7165	24.405	23.5389	22.9746	24.0411	24.3777	22.174	23.9421	23.8598	24.3363	27.3456	27.1345	27.0697	5	4	38.4	38.4	20.786	Dehydrin ERD14
AT3G07090	Q9SFT9	25.1104	22.3236	23.1555	23.2962	23.9656	24.5461	24.8623	23.7484	24.4053	25.1224	25.6201	25.4973	26.1061	25.9217	24.9447	3	3	22.6	22.6	28.846
AT5G26780	Q94C74	24.0056	23.593	24.3848	25.6448	23.4884	23.6629	23.5361	22.8155	23.7877	22.7923	26.1663	25.7302	25.0672	25.5626	26.0164	16	6	49.9	24	57.341	Serine hydroxymethyltransferase 2, mitochondrial
AT5G26120	Q8VZR2	25.5311	22.6211	25.5321	25.5406	25.2088	25.4513	25.9134	25.4993	25.0225	24.9569	23.3211	24.8946	24.2585	24.2985	22.9761	6	6	10.8	10.8	75.438	Alpha-L-arabinofuranosidase 2
AT1G64970	Q9ZSK1	23.6386	23.2049	23.3676	24.674	23.8784	23.118	23.727	23.6417	24.5512	26.8809	25.1157	26.7742	23.9096	23.9604	23.1595	4	4	17.2	17.2	38.075	Tocopherol O-methyltransferase, chloroplastic
AT3G12050	Q9LHL7	23.9201	23.5566	24.2259	22.3554	22.8968	24.6103	22.6562	24.3827	24.2099	25.8884	25.6372	26.2078	25.8051	26.2503	25.9505	6	6	32.8	32.8	40.184
AT3G13860	Q93ZM7	24.4491	24.2077	23.7804	23.6462	23.9982	23.3827	24.5314	24.8958	25.4701	25.7988	25.7215	26.1776	24.288	24.9961	25.3324	7	7	18.5	18.5	60.466	Chaperonin CPN60-like 2, mitochondrial
AT1G51980	Q9ZU25	24.0828	23.9383	23.4899	23.3293	24.3871	23.178	22.8354	23.6349	24.7475	26.128	25.8714	24.2432	25.9488	25.3439	26.2941	6	6	25.2	25.2	54.401	Probable mitochondrial-processing peptidase subunit alpha-1
AT2G44040	O80574	23.7167	23.8504	24.648	23.3091	24.5862	24.0235	24.8884	23.411	22.8866	23.7896	26.0888	25.9668	26.226	26.1136	26.0224	4	2	18.2	15.6	37.55	4-hydroxy-tetrahydrodipicolinate reductase 1, chloroplastic
AT4G03050	Q9ZTA1	25.7984	25.7211	25.6821	24.9908	25.6483	26.486	24.9406	24.8973	24.7723	23.5341	22.8513	23.6567	24.7082	23.7163	24.2118	5	5	21.7	21.7	44.962	2-oxoglutarate-dependent dioxygenase AOP3
AT2G19590	Q9ZUN4	22.9898	24.1045	24.3891	24.8168	22.5973	23.7869	24.1432	23.1685	24.0141	26.2184	26.6356	26.0501	23.301	25.7341	25.8	2	2	8.7	8.7	35.202	1-aminocyclopropane-1-carboxylate oxidase 1
AT5G64300	P47924	23.5766	23.8254	24.2671	25.0648	24.122	23.8242	24.6376	23.9459	24.0573	25.837	26.088	25.6367	25.8677	25.9886	26.1611	6	6	13.8	13.8	59.055	Bifunctional riboflavin biosynthesis protein RIBA 1, chloroplastic;3,4-dihydroxy-2-butanone 4-phosphate synthase;GTP cyclohydrolase-2
AT5G11420	Q9LYE7	24.4199	25.1959	24.1242	23.4794	24.8021	23.7472	25.797	25.9978	25.9644	25.673	25.6855	25.9156	24.593	22.7684	24.8621	6	2	18.3	6.8	39.64
AT1G03630	F4I2F8	23.5325	22.0129	23.8015	22.8168	23.3311	24.4624	22.6459	22.7222	23.9608	25.6858	23.3219	25.7764	26.9378	26.4898	26.2023	8	5	25.8	22.1	43.625	Protochlorophyllide reductase C, chloroplastic
AT1G19130	Q8GYZ3	24.7677	24.7805	23.6533	25.4022	25.3094	25.8491	23.6568	25.2176	24.7616	22.9185	25.6869	25.3252	23.3606	23.3931	23.8743	4	4	32.3	32.3	21.64
AT3G05060	Q9MAB3	23.2814	24.0728	23.9459	23.4362	23.8923	23.995	25.217	25.1908	24.9585	26.2119	25.9258	26.4889	23.578	24.8212	24.4684	7	4	23.6	12.9	59.002	Probable nucleolar protein 5-2
AT3G16990	Q9ASY9	25.3053	25.8081	25.4905	25.0919	25.3634	25.2814	25.3239	25.2176	23.5011	24.3929	24.3351	23.9672	23.8833	23.1468	23.778	4	4	28.5	28.5	25.07	Bifunctional TENA-E protein
AT1G15330	Q9XI37	25.1264	26.4681	25.7717	25.7971	26.3843	25.7095	24.7543	23.632	25.2596	23.8442	23.8346	23.9383	23.6321	22.9635	23.5671	5	5	27.3	27.3	38.596	SNF1-related protein kinase regulatory subunit gamma-like PV42a
AT1G72970	Q9S746	22.8224	23.3284	24.3159	23.0733	24.7849	22.7658	22.9372	22.9627	24.3809	25.5862	23.528	23.1238	26.4753	27.2333	26.4714	5	5	11.6	11.6	65.343	Protein HOTHEAD
AT3G52850	P93026	26.1008	26.3331	26.0475	26.1533	23.4813	25.8803	24.3124	23.207	24.0909	24.8774	22.8109	24.1665	24.22	23.8065	22.6513	5	4	16.1	14.8	68.991	Vacuolar-sorting receptor 1
AT2G46140	O82355	23.6229	24.6948	23.5926	24.6151	24.9058	24.736	23.4693	22.8125	24.4941	25.4302	25.388	25.2212	26.1454	25.8161	25.8703	4	4	32.5	32.5	17.846	Desiccation-related protein At2g46140
AT1G75950	Q39255	24.3912	25.0853	22.8225	23.4514	24.2954	25.4243	25.228	24.5809	24.0512	23.1946	23.3745	25.187	25.1442	25.2667	25.399	3	2	36.2	23.8	17.857	SKP1-like protein 1A
AT5G41670	Q9FFR3	24.7062	23.2332	24.648	23.7802	23.7248	23.4107	22.8953	22.9174	23.3778	25.3682	25.7483	25.1655	24.2687	23.7945	22.6822	12	4	35.7	14.2	53.317	6-phosphogluconate dehydrogenase, decarboxylating 2, chloroplastic
AT3G60340	Q9LY31	26.1782	24.9679	25.2127	23.7959	25.2932	25.03	25.2643	25.0712	25.2014	24.9403	24.7241	24.7625	23.572	24.1063	22.9957	3	3	13.3	13.3	37.083
AT4G10020	Q9T0G0	25.3449	25.3499	25.2371	25.7949	23.8912	25.4415	25.6264	25.4435	25.4832	25.3269	23.6177	23.6355	24.0105	24.286	23.4881	2	2	8	8	43.441	11-beta-hydroxysteroid dehydrogenase-like 5
AT5G10560	Q9LXA8	23.3554	23.8695	25.376	23.3304	23.4915	24.1289	23.4198	25.2881	23.7159	25.5452	25.4211	25.0935	24.8375	25.7756	25.5841	5	5	7.3	7.3	87.184	Probable beta-D-xylosidase 6
AT5G46750	Q9FIQ0	24.1678	23.9576	23.9221	21.4804	22.9423	24.6819	23.5022	23.4123	24.4894	25.7071	23.6477	25.6469	25.7934	25.9677	25.746	3	2	10.7	7.5	43.55	Probable ADP-ribosylation factor GTPase-activating protein AGD9
AT1G09500	F4I101	25.2035	25.2815	25.3595	26.4727	25.2656	25.466	25.3975	24.0998	26.0174	22.2702	23.1298	23.6686	24.0399	22.8717	24.4183	3	3	14.4	14.4	32.214
AT5G20500	Q8LFQ6	23.5013	22.5248	24.3745	24.3569	23.9044	23.9127	24.3126	23.4202	23.5949	23.8462	25.001	24.9652	25.531	26.043	26.6917	5	5	48.9	48.9	14.827	Glutaredoxin-C4
AT3G21200	Q9LU39	24.6367	23.5486	22.9705	23.8213	24.3116	24.0206	23.2478	22.3434	25.2434	23.0702	26.3677	23.9595	26.1941	26.6029	26.4912	3	3	15.5	15.5	35.463	Glutamyl-tRNA reductase-binding protein, chloroplastic
AT1G77440	O81153	26.1239	25.7527	22.9374	25.3529	25.6922	25.8399	25.2821	25.1531	23.2519	23.3476	24.0374	21.4963	24.2707	22.7927	23.9327	6	1	31.9	10.8	22.759	Proteasome subunit beta type-3-B
AT1G12000	Q8W4M5	25.3729	24.1927	23.9743	23.9304	23.6061	23.6758	24.0256	24.6468	23.7257	25.9544	25.6219	26.2008	25.8179	23.1523	26.0137	5	5	14.7	14.7	61.459	Pyrophosphate--fructose 6-phosphate 1-phosphotransferase subunit beta 1
AT4G29120	Q9SZE1	23.3873	25.4861	24.5322	24.4917	24.0073	26.3016	25.4614	24.2233	24.9681	23.403	24.0416	23.8245	25.5494	25.388	25.5987	5	5	25	25	32.796	Probable 3-hydroxyisobutyrate dehydrogenase-like 1, mitochondrial
AT3G11330	Q8VYG9	24.0808	24.512	25.6055	23.3238	24.1767	23.9225	23.2103	23.4819	23.9812	25.609	25.7426	25.912	26.07	24.9869	25.6451	3	3	13	13	55.502	Plant intracellular Ras-group-related LRR protein 9
AT4G39520	Q9SVA6	24.9626	22.7688	24.9137	24.0276	24.8946	24.7785	25.4769	25.0272	25.7024	25.0533	24.8847	24.8531	24.6271	23.3098	24.2789	6	6	21.7	21.7	41.143	Developmentally-regulated G-protein 3
AT5G37475	Q8GRX2	23.1422	23.5898	23.3422	23.067	23.3148	25.0131	23.9584	24.8065	23.2798	23.446	23.1256	23.3289	25.9843	25.9697	25.7278	1	1	8	8	25.168	Eukaryotic translation initiation factor 3 subunit J
AT2G38700	O23722	24.6788	25.2654	24.82	23.6198	25.3092	25.0546	25.1642	24.8163	24.259	24.3874	24.8295	24.8883	24.1768	24.4471	24.6327	3	3	12.4	12.4	45.585
AT2G30930	O80858	23.8224	23.0907	23.9638	23.4981	23.6064	23.2261	23.3576	23.4128	23.5435	23.1491	23.9428	24.0544	26.9621	26.8129	26.8327	3	3	39	39	16.936
AT1G75330	O50039	23.7163	23.5312	25.9175	22.6365	23.7619	25.2619	25.4234	23.7336	23.0055	24.3143	25.5881	24.5331	25.0217	24.7339	25.2247	4	4	19.5	19.5	41.002	Ornithine carbamoyltransferase, chloroplastic
AT2G25980	O80998	24.7143	22.59	22.5418	23.265	24.2625	24.332	23.307	23.3732	23.4891	26.0057	25.9717	24.4003	25.7985	25.9934	25.9878	4	4	13.1	13.1	48.978	Jacalin-related lectin 20
AT2G02740	Q66GR6	24.4696	23.3155	23.415	24.4949	23.3709	23.8151	23.5344	23.3082	24.4472	25.7057	25.239	26.032	24.6855	25.9217	25.4096	5	4	27.3	22.5	29.64	Single-stranded DNA-binding protein WHY3, chloroplastic
AT2G28470	F4IIQ3	24.9132	23.2088	24.8351	23.5938	23.917	23.5703	22.198	24.067	24.25	24.5502	25.0524	24.5563	26.0787	24.7411	25.3093	3	3	7.3	7.3	92.565	Beta-galactosidase;Beta-galactosidase 8
AT3G15010	Q9LKA4	24.5299	24.367	24.5757	24.0781	24.6402	24.7406	25.0443	25.1464	24.8512	24.8798	24.5251	24.8417	25.3003	24.5008	24.5688	4	4	19.3	19.3	41.779	UBP1-associated protein 2C
AT4G20260	F4JUT9	24.0299	24.092	24.5721	23.1641	23.4326	23.4007	23.4326	23.6111	23.4864	25.2064	24.3902	24.9598	27.3853	26.4517	25.8882	5	5	36.5	36.5	18.989	Plasma membrane-associated cation-binding protein 1
AT1G80600	Q9M8M7	23.7186	22.4646	24.5269	22.8414	22.3215	22.9115	24.1506	25.2467	23.3152	25.8561	24.3204	26.1486	25.6271	26.0877	25.7399	6	6	26.3	26.3	48.826	Acetylornithine aminotransferase, chloroplastic/mitochondrial
AT3G48700	Q9SMM9	24.3585	23.3948	23.6537	24.3015	24.0674	23.5392	24.3112	22.7856	22.9802	26.218	25.983	26.1898	25.3198	25.7948	25.7272	5	4	33.1	29.2	36.099	Probable carboxylesterase 13
AT2G17560	Q42344	22.7878	24.4528	23.7037	23.072	22.8559	23.2417	23.5948	22.8685	23.9642	26.7571	25.2335	26.6492	22.5786	23.0926	22.9484	2	2	11.2	11.2	14.975	High mobility group B protein 4
AT4G14040	Q93WN0	25.538	25.6459	25.1962	24.8365	24.8431	25.0317	24.4738	24.5401	24.815	24.1778	24.8473	24.2463	23.1243	23.9225	22.6255	7	3	16.8	9.9	53.937	Selenium-binding protein 2
AT3G10520	O24521	23.4958	23.2898	22.1424	24.4869	24.1872	23.4882	24.2217	23.4825	23.8528	25.5821	25.4745	25.596	26.0083	25.7638	26.016	4	4	31	31	17.871	Non-symbiotic hemoglobin 2
AT5G66140	O24616	25.2195	23.5764	25.0015	25.3231	23.8511	25.14	23.1468	24.1357	24.5304	24.7342	24.7097	24.4769	24.4936	24.1704	23.7533	13	3	54.8	16.4	27.324	Proteasome subunit alpha type-7-B
AT5G05290	Q38866	23.8689	23.7215	23.5828	24.7702	22.2584	23.3491	26.0691	26.182	26.1551	24.1401	24.036	24.2036	23.0716	24.9933	24.8974	4	4	17.6	17.6	27.749	Expansin-A2
AT1G29670	Q9C7N4	23.8157	24.0883	23.2459	23.5658	23.0743	25.3109	23.5345	23.8366	23.4604	23.7565	24.5649	24.5141	26.9052	27.1395	26.7451	6	6	28.7	28.7	39.871	GDSL esterase/lipase At1g29670
AT2G47970	O82264	23.6925	24.0959	23.9097	23.3213	23.6199	21.6376	23.7111	22.5917	25.2685	25.0364	24.5161	25.2004	24.8684	25.2626	24.9666	2	2	7.3	7.3	46.169	NPL4-like protein 2
AT1G13280	Q93ZC5	23.4061	24.1128	23.3903	23.4899	22.37	23.3523	22.8957	24.8518	22.6919	25.3841	23.6681	22.8347	26.6403	26.2556	25.9433	3	3	18.9	18.9	27.809	Allene oxide cyclase 4, chloroplastic
AT4G26690	Q9SZ11	24.1566	23.9684	26.3505	23.6725	23.4085	23.2384	22.8348	23.7472	23.0651	23.1779	25.7826	24.4314	25.7489	25.5664	24.5882	5	5	10.9	10.9	82.561	Glycerophosphodiester phosphodiesterase GDPDL3
AT3G04550	Q9SR19	22.7218	23.7345	22.7432	24.5558	24.9037	23.8637	24.7201	23.8861	23.7517	23.5632	24.1131	24.1688	26.459	26.3985	26.4393	5	5	17.8	17.8	50.199	Rubisco accumulation factor 2, chloroplastic
AT3G14100	Q9LJH8	24.4226	23.0399	23.5039	25.0317	23.9534	22.9612	24.9316	25.0014	24.9261	25.4944	25.609	25.3273	25.4797	25.2778	25.2242	4	1	11.9	5.4	47.088	Oligouridylate-binding protein 1C
AT2G44790	O80517	24.3739	24.467	23.9492	23.3692	25.1573	24.1883	23.5503	24.4875	24.6573	24.5102	23.2933	24.9823	27.0478	26.9002	26.3931	2	2	11.9	11.9	20.354	Uclacyanin-2
AT3G08530	Q0WLB5	24.1507	24.4937	24.349	24.759	25.3088	24.5109	25.7695	25.1911	25.4606	25.053	24.6268	24.6749	23.2838	23.5547	24.4923	22	2	20.7	2.2	193.27	Clathrin heavy chain 2
AT3G01500	A0A1I9LQB3	23.1309	22.6536	23.1947	24.6074	24.05	24.866	24.1953	22.9653	23.5612	22.7632	23.195	24.9398	27.0836	26.9381	26.5112	9	4	48.3	24.7	28.198	Beta carbonic anhydrase 1, chloroplastic
AT2G47710	O82240	23.8407	24.6939	22.9692	23.2855	24.9672	23.4767	23.5322	23.8626	23.9186	23.2798	26.096	22.9031	25.6531	25.9645	25.9676	2	2	29.6	29.6	17.301
AT5G65720	A8MSF1	24.1054	23.7555	23.4707	23.4006	22.7217	23.4216	24.0392	24.0583	25.3607	25.4057	25.6055	25.295	23.8144	23.2636	23.6663	3	3	11.1	11.1	36.127	Cysteine desulfurase, mitochondrial
AT3G14930	Q93ZB6	22.4267	22.7761	23.417	25.0081	23.2217	24.7461	24.2558	24.2369	25.209	25.2105	25.8164	24.767	25.4316	25.9427	25.7873	5	5	18.9	18.9	46.254	Uroporphyrinogen decarboxylase 1, chloroplastic
AT3G05900	A0A1I9LR13	24.6667	24.7219	23.8368	23.8697	23.9936	24.0557	22.7203	24.3507	23.3609	24.3046	22.8159	23.7469	27.0968	26.7828	26.7754	3	3	13.5	13.5	70.531
AT3G57290	Q9C5Z3	24.3864	23.064	24.6164	23.5266	24.5099	26.1601	25.0359	24.8072	24.4653	24.7633	24.8735	24.7122	23.8938	23.866	24.3178	5	5	13.6	13.6	51.749	Eukaryotic translation initiation factor 3 subunit E
AT2G25670	Q9SL96	21.7924	23.6763	25.7373	23.6695	24.5652	23.2915	23.6616	23.2653	24.7888	23.5599	24.3343	22.3115	26.2193	25.8784	25.12	1	1	6.3	6.3	35.128
AT3G48560	P17597	25.2476	24.9352	23.8263	24.3299	25.5398	26.0023	23.9377	24.7671	24.8097	25.7512	25.7706	25.747	25.7687	23.8133	25.6321	5	5	8.8	8.8	72.584	Acetolactate synthase, chloroplastic
AT5G01650	Q9M011	23.6843	24.033	23.4478	24.9191	23.7562	24.3144	24.7256	24.5444	23.7785	24.142	23.4148	24.8021	26.0421	25.3687	25.6095	2	2	40	40	12.111
AT5G36890	Q9FIW4	23.6367	23.9788	22.1506	22.6367	24.7821	24.6161	24.3087	23.8518	24.6367	24.6104	24.7481	24.7774	25.3428	24.966	23.2257	3	3	7.8	7.8	55.763	Beta-glucosidase 42
AT4G38800	Q9T0I8	22.8106	24.408	24.92	24.7978	23.8644	24.4915	23.9242	24.4093	24.4822	26.2632	25.4985	24.2812	26.2307	25.7123	26.2654	6	6	36.7	36.7	28.45	5-methylthioadenosine/S-adenosylhomocysteine nucleosidase 1
AT3G10850	O24496	25.9534	23.5875	23.9035	25.0604	24.9095	25.6988	24.5765	24.6887	24.9255	24.0708	23.8244	24.9028	23.8696	23.7201	23.882	3	3	36.8	36.8	28.791	Hydroxyacylglutathione hydrolase cytoplasmic
AT2G35605	Q93W30	23.5337	24.4788	24.1417	23.9065	24.1708	23.824	24.41	23.797	24.2177	23.8458	24.7412	23.4158	24.9937	25.6473	25.0093	2	2	26.6	26.6	11.951
AT5G55280	Q42545	23.9709	23.1291	23.7947	23.6282	24.1855	23.7942	23.7564	23.8282	23.2407	24.1767	25.7648	23.2571	26.5261	26.4665	26.1314	7	7	33	33	45.564	Cell division protein FtsZ homolog 1, chloroplastic
AT3G15356	Q9LJR2	23.5781	23.9719	24.2869	23.0157	25.0952	24.0913	23.4408	23.7858	23.2206	23.2129	23.6105	23.6141	26.931	26.5756	26.5591	4	4	22.9	22.9	29.749	Lectin-like protein LEC
AT3G22330	Q9LUW5	23.0503	22.9969	24.2201	23.2577	23.194	23.671	25.5045	25.3476	23.2131	26.0087	25.6078	25.5836	23.742	23.4934	24.1139	5	3	10.2	8	65.359	DEAD-box ATP-dependent RNA helicase 53
AT1G74470	Q9CA67	23.6599	23.008	23.3965	23.9159	24.2906	23.8608	23.8235	23.4263	22.2171	23.0818	23.4076	26.351	26.376	26.3408	26.0779	4	4	8.1	8.1	51.837	Geranylgeranyl diphosphate reductase, chloroplastic
AT3G53900	Q9M336	23.5046	23.0695	23.5448	23.4758	24.001	23.1602	23.0416	23.6244	23.8663	25.822	25.2886	24.7096	26.0048	25.5736	25.3928	5	5	34.6	34.6	25.161	Uracil phosphoribosyltransferase, chloroplastic
AT2G24020	O82230	22.3287	23.6163	22.7989	24.5404	24.2689	24.6812	24.7065	24.0947	23.2988	25.0818	23.4617	24.546	26.7664	26.7317	26.2144	2	2	22.2	22.2	19.625
AT2G20610	Q9SIV0	24.0241	23.1071	23.3613	23.218	23.0068	24.4503	23.2783	22.8863	24.6822	25.8482	25.2034	25.4239	24.8617	25.3246	25.142	4	4	13.9	13.9	51.087	S-alkyl-thiohydroximate lyase SUR1
AT5G36700	P0DKC3-2	23.5128	24.4761	23.0486	23.3093	22.8266	24.0549	24.3438	23.896	23.9841	23.4279	22.8611	23.6416	26.9762	26.6943	26.3449	4	4	17.2	17.2	36.476	Phosphoglycolate phosphatase 1A, chloroplastic;Phosphoglycolate phosphatase 1B, chloroplastic			AT5G36790
AT3G05970	Q8LPS1	23.5832	23.8846	22.3214	22.9838	24.3675	23.2323	22.4604	25.9651	23.9416	26.0194	26.1281	25.9622	23.1226	23.6062	23.2736	5	5	13	13	76.603	Long chain acyl-CoA synthetase 6, peroxisomal
AT3G60210	Q9M1C2	24.4369	24.4401	23.8999	23.458	22.8943	23.9067	23.4112	23.7123	24.2535	24.0635	23.1034	23.7209	26.8646	26.2988	26.2376	3	2	26.8	26.8	15.14
AT2G16430	Q9SIV9	24.9976	25.0233	24.6332	23.8083	24.2178	23.4503	23.0359	24.1115	25.3943	25.5749	25.277	25.449	25.0715	25.2193	25.1173	2	2	9.8	9.8	54.218	Purple acid phosphatase 10
AT5G42080	F4K015	22.6124	23.4809	24.6989	24.2791	24.236	24.0362	24.3602	24.5902	23.0616	25.7758	25.0485	25.4602	24.6778	24.6388	24.569	3	3	7.3	7.3	67.51	Dynamin-related protein 1A
AT2G41430	Q39096	24.016	24.0497	23.4319	22.99	22.6142	23.4457	24.0103	23.4676	23.8561	23.6098	24.5585	24.6017	26.5749	25.7759	26.3038	2	2	14.2	14.2	13.63	Protein EARLY RESPONSIVE TO DEHYDRATION 15
AT3G18420	Q9LS48	23.7314	23.8493	22.5555	22.088	23.9646	24.0658	23.3988	23.2988	24.6792	25.6003	25.7308	25.509	25.901	25.6688	25.443	5	5	27.5	27.5	35.63	protein SLOW GREEN 1, chloroplastic
AT3G45780	O48963	23.5683	23.1131	24.287	23.1338	22.3579	23.7083	24.1857	24.9518	23.7114	24.4531	24.5275	25.8833	26.4875	26.2243	26.5996	6	6	9.3	9.3	111.69	Phototropin-1
ATCG00670	P56772	24.4635	22.9866	23.5997	22.9665	24.3494	23.3218	24.1828	23.8131	23.5674	23.6251	25.0822	24.8436	25.4105	25.5404	25.2854	3	3	23.5	23.5	22.123	ATP-dependent Clp protease proteolytic subunit 1
AT1G76680	F4I403	24.5717	24.0139	23.8117	24.0714	24.9662	23.9973	23.8709	22.619	23.6264	23.0198	25.0543	23.7364	26.4682	26.6359	26.5861	5	5	17.9	17.9	44.015	12-oxophytodienoate reductase 1;12-oxophytodienoate reductase 2
AT1G19140	Q9LMB2	24.6837	24.0859	23.836	23.8193	24.5794	26.6852	24.7645	24.3158	24.3907	24.9261	24.2802	23.2844	24.1144	24.1835	23.5759	3	3	19.9	19.9	34.341
AT3G57410	O81645	23.8614	24.0469	23.3253	24.3412	23.8126	24.4523	23.8542	24.0755	23.4103	23.9439	22.8657	26.8107	26.0524	25.7513	25.4869	6	6	9	9	106.35	Villin-3
AT1G48610	Q3ECU3	23.0609	25.4145	23.1874	23.1572	23.748	23.4956	24.73	25.3246	23.7335	25.1514	24.8362	25.0875	23.5461	24.8733	23.2638	2	2	16.7	16.7	20.208	Putative DNA-binding protein At1g48610
AT1G52560	Q9SSQ8	23.6183	23.2649	24.5221	25.0037	25.0585	26.9517	22.0901	24.1393	23.668	23.7049	23.0991	23.8198	23.8409	24.3939	22.7426	2	2	12.9	12.9	25.713	26.5 kDa heat shock protein, mitochondrial
AT2G40765	Q94K78	23.2648	23.8846	24.059	24.8053	23.5639	23.6201	23.7186	23.1519	24.07	25.4384	24.2977	25.17	26.6449	25.5453	25.5163	3	3	43.9	43.9	5.9759
AT3G10670	Q9CAF5	23.1384	24.0168	24.0256	24.3952	23.152	23.1954	23.707	23.157	22.6931	24.5395	23.286	23.2007	26.5793	26.4831	26.3102	3	3	13.6	13.6	36.931	ABC transporter I family member 6, chloroplastic
AT4G29270	Q9M0F4	23.577	22.8774	23.0288	24.2801	22.6741	23.7919	22.2313	23.4928	23.1378	22.9389	23.935	24.8458	26.5935	26.4767	26.3693	3	3	15.2	15.2	28.746
ATCG00380	P56799	23.8579	23.5154	24.813	24.5772	23.4162	25.168	24.231	23.5588	23.4733	25.7262	25.3581	25.3638	25.9114	25.6173	25.7108	5	5	38.8	38.8	23.24	30S ribosomal protein S4, chloroplastic
AT1G20020	Q8W493	22.7499	23.4203	23.1831	24.4763	26.0025	23.1292	21.9859	24.3256	22.8398	25.1276	23.9379	25.3247	25.0486	23.9036	24.7613	8	7	35.7	32.6	39.233	Ferredoxin--NADP reductase, leaf isozyme 2, chloroplastic
AT3G14290	Q42134	25.4273	23.7911	24.0875	24.0554	23.6176	25.1869	25.0857	23.7755	23.506	24.2646	23.9695	23.5933	23.6849	23.9883	24.5962	13	2	70.9	23.2	25.977	Proteasome subunit alpha type-5-B
AT2G20270	Q8LBS4	24.1133	24.0014	24.0367	24.3273	23.0056	24.1413	24.2607	24.4551	24.2858	23.9719	24.5151	24.7651	25.994	25.5275	25.5321	2	2	23.5	23.5	19.125	Monothiol glutaredoxin-S12, chloroplastic
AT1G20580	Q9LM92	24.8665	24.7309	23.8637	24.1813	24.1736	23.8584	24.0023	23.423	22.7898	23.2447	24.8974	25.3297	25.845	25.9674	25.7599	3	2	26	18.3	14.237	Small nuclear ribonucleoprotein SmD3b
AT1G12230	Q9FWX0	23.6612	23.3742	22.7593	22.9569	23.3381	23.7387	23.7682	23.2805	24.5299	22.3794	23.4522	25.1895	25.8011	25.5981	25.5762	5	5	15.3	15.3	43.994
AT3G10350	A1L4Y1	24.3182	24.4268	24.8041	24.7855	24.7895	24.7833	24.5926	24.6403	23.7646	24.4495	24.402	24.4819	22.8569	23.2797	22.7746	2	2	5.4	5.4	44.753
AT5G42270	Q9FH02	24.3496	24.258	24.9299	23.4751	23.8455	24.5125	24.3231	24.3739	25.3543	25.636	25.229	25.5653	24.5203	24.405	23.6355	3	3	7.5	7.5	75.231	ATP-dependent zinc metalloprotease FTSH 5, chloroplastic;ATP-dependent zinc metalloprotease FTSH 1, chloroplastic
AT1G76810	F4I420	23.7396	24.206	23.6738	24.4596	24.0134	24.6431	23.3456	24.2347	23.6395	23.7233	25.3178	23.6621	25.3308	24.938	25.0274	4	4	6.8	6.8	142.11
AT1G54630	P25702	24.5296	24.6732	23.2672	24.1178	24.7664	24.6287	23.1204	24.0484	24.0943	24.1569	23.8527	24.5651	24.7214	24.379	23.8396	1	1	15.4	15.4	14.65	Acyl carrier protein 3, chloroplastic
AT4G33250	Q9SZA3	24.445	22.5355	24.9159	24.0357	23.9769	22.5474	25.4862	24.0108	25.2418	24.7283	24.2818	25.0778	24.5722	24.7215	24.2419	5	5	36.3	36.3	25.728	Eukaryotic translation initiation factor 3 subunit K
AT5G01600	Q39101	23.5947	24.2325	23.5105	23.5281	23.817	24.0492	24.6471	23.2068	23.8117	23.4815	23.2796	23.8602	26.4661	25.7309	26.7188	3	3	20.4	20.4	28.178	Ferritin-1, chloroplastic
AT3G61540	Q9M314	24.5133	24.9067	24.8373	24.8926	24.9974	24.8547	24.7695	24.9169	24.6835	23.9197	24.0485	23.468	23.9662	22.6946	25.103	2	2	3.5	3.5	57.585
AT1G10960	O04090	23.9855	23.2401	24.7457	25.7825	24.7293	22.7406	23.837	24.915	23.8652	23.6818	24.5759	24.219	25.5998	25.382	25.1003	2	2	24.3	24.3	15.897	Ferredoxin-1, chloroplastic
AT4G11740	F4JPR7	24.7819	23.0071	23.3754	24.6806	25.0133	24.7329	24.8811	24.3712	24.587	24.1198	24.9935	25.2307	25.3642	24.9577	24.9078	4	4	13.7	13.7	62.349	Plant UBX domain-containing protein 8
AT4G14430	O23299	24.7	25.203	23.8747	25.1737	24.7431	23.7529	25.019	23.0407	24.2199	23.7061	25.2747	26.1779	23.7333	23.8101	23.8926	3	3	20	20	25.773	Enoyl-CoA delta isomerase 2, peroxisomal
AT4G01690	P55826	25.2395	23.5666	23.7809	24.3611	23.2531	24.0085	24.2681	24.0254	23.4743	25.2318	25.8423	25.4521	25.7459	25.3412	25.4854	6	6	20.9	20.9	57.695	Protoporphyrinogen oxidase 1, chloroplastic
AT5G49360	Q9FGY1	23.4419	23.7958	22.8245	24.686	23.6186	23.2686	23.027	24.0157	24.7389	25.8571	25.6568	26.0026	24.7341	25.3136	23.4283	7	7	14.1	14.1	83.523	Beta-D-xylosidase 1
AT4G26300	O23247	24.5438	24.285	22.4286	24.6155	23.8191	24.1381	25.0233	24.9113	24.6684	25.3404	24.6033	25.2517	23.7439	24.0962	24.2381	5	5	11.2	11.2	72.386
AT5G11450	P82715	23.9295	24.4739	23.8603	23.7732	25.0879	23.523	23.2975	23.5484	24.6852	24.0247	22.8027	23.4616	26.5281	26.4226	26.5371	6	6	33	33	33.365	PsbP domain-containing protein 5, chloroplastic
AT5G08530	Q9FNN5	23.0516	23.7744	23.5244	23.2765	23.6805	24.4006	23.3454	24.114	24.5558	25.4826	25.2675	25.6633	25.344	22.811	24.8472	5	5	20.8	20.8	53.449	NADH dehydrogenase [ubiquinone] flavoprotein 1, mitochondrial
AT1G72150	Q56WK6	23.7742	24.3693	24.3348	24.1909	24.0776	22.5078	23.8144	23.8442	23.8562	24.549	23.4256	24.2172	26.4683	26.4699	26.0888	8	5	20.6	14.5	64.046	Patellin-1
AT3G15610	Q9LW17	24.9733	24.1852	24.1724	22.3303	24.0637	23.4714	22.5844	24.365	23.5705	25.3912	24.6775	25.149	25.3518	25.4042	25.2567	3	3	12	12	37.355
AT5G20160	Q94AF6	24.5191	23.988	22.8292	23.2236	23.6691	24.4388	24.4357	23.9759	23.8376	24.9128	23.3324	25.3111	25.8364	25.3708	25.8985	2	1	35.9	17.2	13.897
AT1G03330	Q1H595	23.89	23.752	23.3158	24.8286	24.4157	23.3843	24.8085	24.0005	23.9532	25.0113	25.2634	24.535	25.7412	25.9359	25.478	2	2	29	29	10.694	Sm-like protein LSM2
AT1G27130	Q9FUS6	24.3371	23.4911	23.8329	25.4179	23.6819	24.0504	23.4469	23.1826	25.6146	24.0929	25.486	25.0968	25.73	25.5204	25.8579	2	2	11	11	25.131	Glutathione S-transferase U13
AT5G67590	Q9FJW4	23.5669	23.9944	23.8563	23.4414	24.3206	21.9437	24.0001	22.9651	23.7737	24.0062	23.6646	23.9052	26.5488	26.2649	25.8432	2	2	13.6	13.6	17.134	NADH dehydrogenase [ubiquinone] iron-sulfur protein 4, mitochondrial
AT5G27410	Q9ASR4	24.1587	23.9917	23.5527	23.9212	25.0239	23.5919	22.8767	23.332	23.4866	25.8016	25.9979	25.6299	23.8675	26.0751	25.2674	8	5	23.6	15.7	62.896	Branched-chain-amino-acid aminotransferase-like protein 2
AT5G15450	Q9LF37	22.938	22.6954	23.2854	22.6896	23.6828	23.0164	24.3444	23.8958	23.4253	23.3937	24.7802	24.4775	25.1631	26.1102	25.6974	7	6	10.6	9.3	108.94	Chaperone protein ClpB3, chloroplastic
AT2G22240	Q38862	26.1048	23.5097	25.6764	25.3228	25.2683	25.9426	23.8218	23.8081	23.3159	23.7805	25.1037	23.9208	22.6229	23.2917	24.3623	5	5	16.7	16.7	56.337	Inositol-3-phosphate synthase isozyme 2;Inositol-3-phosphate synthase isozyme 1
AT1G30120	Q9C6Z3	24.1324	24.5825	24.171	24.3571	23.216	23.231	24.21	22.8023	23.9076	24.3238	25.2436	25.1025	25.1426	24.8486	24.7367	2	2	7.9	7.9	44.244	Pyruvate dehydrogenase E1 component subunit beta-2, chloroplastic;Pyruvate dehydrogenase E1 component subunit beta-3, chloroplastic
AT1G68590	A8MQL0	23.3537	24.382	24.2014	25.0142	25.0628	23.8821	23.3256	23.7174	23.5061	23.7418	22.8703	26.2673	25.7063	25.7159	25.37	2	2	23.3	23.3	18.146	30S ribosomal protein 3-1, chloroplastic
AT5G51120	F4KBV2	23.9116	24.0498	22.435	23.4912	23.0913	23.5389	23.9681	23.7544	23.6035	23.8642	23.4198	24.6121	25.499	25.4521	25.5418	2	2	28.2	28.2	16.247	Polyadenylate-binding protein 1;Polyadenylate-binding protein 2
AT4G33030	O48917	24.8522	23.3019	24.2804	23.4696	23.5127	23.9085	23.3063	23.1466	23.7284	24.7557	24.9648	24.2142	26.0613	25.8876	25.9604	3	3	10.5	10.5	53.113	UDP-sulfoquinovose synthase, chloroplastic
AT5G53480	Q9FJD4	22.4739	24.0314	23.892	24.6929	22.6989	24.572	24.2025	25.8817	26.1974	23.3365	24.4063	25.4787	23.4527	24.6278	23.7245	5	5	12.9	12.9	96.258	Importin subunit beta-1
AT1G22840	O23138	23.5208	22.9491	25.3197	23.7036	23.7396	23.2403	25.0185	24.0608	24.0075	23.9152	23.0734	23.1388	25.5303	25.4864	25.349	2	2	20.2	20.2	12.394	Cytochrome c-1;Cytochrome c-2
AT4G31180	Q9M084	24.8382	24.6526	24.3575	24.8453	23.5468	23.8087	25.0359	25.1003	25.2795	22.4946	24.5753	24.7948	23.2887	23.4273	23.5111	7	6	16.5	14.7	62.917
AT1G69250	F4I0L1	23.6489	24.1727	23.3889	23.6701	25.0411	23.6233	24.6461	24.1279	23.9023	25.4508	24.8623	25.2886	25.4907	25.1106	25.3807	3	3	8.5	8.5	42.913
AT1G15820	Q9LMQ2	22.7854	23.2375	23.3878	24.5522	24.429	24.1029	23.1509	25.0061	24.9232	23.5775	23.7965	24.1687	26.7601	26.3249	25.7445	3	3	16.7	16.7	27.522
AT2G25840	Q8RXE9	23.8323	23.9825	23.3114	24.3389	24.695	23.7647	23.4601	23.7139	23.577	24.2706	23.878	23.6382	24.9342	24.7479	25.3187	2	2	14.5	14.5	45.3
AT3G06810	Q8RWZ3	22.8911	24.9668	24.661	24.0305	24.9332	24.7021	24.9134	24.9092	24.6273	22.9082	24.3072	24.3717	22.9927	23.4864	23.4362	5	5	8.7	8.7	91.712	Probable acyl-CoA dehydrogenase IBR3
AT3G20370	A0A1I9LRA3	22.9342	24.1479	22.5771	23.498	24.1146	24.3667	24.1058	24.2025	24.1904	25.2521	24.9656	24.7541	25.5447	25.7451	25.6968	4	4	10.6	10.6	41.105
AT4G18970	F4JSC9	24.0708	22.7168	23.9425	23.9413	24.5499	24.1469	25.2333	23.1608	23.5377	24.0678	24.4031	22.2884	25.8584	26.6197	26.5627	7	7	42.7	42.7	45.267	GDSL esterase/lipase At4g18970
AT1G17220	Q9SHI1	23.5655	24.5695	23.3317	23.8391	23.2694	22.9346	23.2444	23.9852	24.7727	24.3088	22.5477	23.8265	26.1888	25.7525	25.9003	4	4	6.2	6.2	109.75	Translation initiation factor IF-2, chloroplastic
AT3G52140	F4J5S0	24.5807	24.9496	23.8664	24.231	24.8193	23.7114	23.1898	24.7801	24.9023	25.5746	24.8514	25.6254	23.5874	22.5469	23.9455	4	4	4.8	4.8	152.52	Clustered mitochondria protein homolog;Clustered mitochondria protein
AT3G12260	Q9LHI0	24.4801	24.8502	24.0846	23.2765	24.4095	24.5539	22.6934	23.4724	23.5279	25.5121	25.1927	25.0739	25.5478	25.3506	25.1746	5	5	54.1	54.1	15.082	NADH dehydrogenase [ubiquinone] 1 alpha subcomplex subunit 6
AT1G53540	P13853	23.7167	24.8398	24.357	24.9259	24.9046	24.1193	23.0471	24.7965	25.1969	23.1921	24.5831	24.245	22.9639	23.418	23.7085	8	0	42	0	17.604	17.6 kDa class I heat shock protein 3
AT3G42170	A0A1I9LLZ3	22.8319	24.8851	23.9209	24.2241	23.1532	24.0938	25.2856	25.1972	25.3398	24.9717	23.6405	23.4163	23.2532	24.047	24.3303	3	3	5.9	5.9	76.327	Zinc finger BED domain-containing protein DAYSLEEPER
AT1G04980	Q9MAU6	23.949	23.9554	22.5936	23.0335	23.9838	24.3784	21.8697	24.0946	24.7558	25.5867	22.9065	23.1848	25.5454	25.5862	25.394	2	2	6.3	6.3	48.403	Protein disulfide-isomerase like 2-2
AT4G33580	Q94CE3	24.4023	24.1213	23.4187	22.7487	23.8722	23.4286	24.6946	23.2996	24.1356	22.9375	23.9371	24.0473	25.6575	25.6109	25.6627	5	5	21.3	21.3	33.4	Beta carbonic anhydrase 5, chloroplastic
AT1G52670	Q8VZ68	24.0269	23.6622	24.8391	23.2821	23.7804	23.1409	23.1806	24.2822	24.2612	23.3412	24.7633	24.9024	25.1288	25.0626	24.6452	4	4	28.5	28.5	29.573
AT5G53140	Q94AT1	23.227	23.8933	23.9191	23.8124	24.2789	23.4383	24.2203	23.9371	22.2203	24.1272	24.2197	24.119	26.0786	26.0698	26.2152	5	5	18.1	18.1	45.786	Probable protein phosphatase 2C 76
AT1G03870	Q9ZWA8	23.6219	22.7611	23.518	22.8972	23.703	23.4188	24.4174	23.7267	23.384	23.7941	22.5664	22.9997	26.0383	26.1967	25.6559	2	2	15.8	15.8	26.115	Fasciclin-like arabinogalactan protein 9
AT5G09650	Q9LXC9	24.2926	22.9316	24.2138	23.9661	23.9744	24.2447	24.2816	25.0785	24.2719	21.8996	23.4706	24.0753	26.1829	26.3281	25.8349	4	4	18.3	18.3	33.38	Soluble inorganic pyrophosphatase 6, chloroplastic
AT3G46010	Q39250	22.7349	23.1002	23.6574	24.1377	23.7928	24.1024	23.3295	23.8773	23.6673	25.5942	25.3534	25.5508	25.1287	23.3944	24.2515	3	2	20.1	20.1	16.112	Actin-depolymerizing factor 1;Actin-depolymerizing factor 4
AT1G48520	Q9FV81	23.3133	23.3003	22.0791	22.8265	23.2373	23.8609	23.8343	23.3146	23.4764	24.6831	23.1744	24.7712	25.4654	26.3638	25.6294	7	7	24.5	24.5	60.94	Glutamyl-tRNA(Gln) amidotransferase subunit B, chloroplastic/mitochondrial
AT3G23600	F4J447	24.9024	24.4889	24.204	23.6609	24.1219	23.5558	23.7587	23.1954	24.039	24.9406	24.493	25.6829	25.5124	25.5972	25.679	5	5	44.9	44.9	25.563
AT1G05260	O23044	23.9863	23.9381	22.6575	23.0797	25.018	23.6317	24.0569	22.9088	25.1522	23.4389	23.9019	25.5368	25.9066	26.0614	25.949	3	2	10.4	7.7	34.905	Peroxidase 3
AT3G63140	Q9LYA9	23.3959	23.3279	23.8749	23.5013	23.7825	23.5383	22.3915	24.0774	23.0371	25.7791	24.7768	23.1678	26.5687	26.2569	26.0592	3	3	14.3	14.3	43.929	Chloroplast stem-loop binding protein of 41 kDa a, chloroplastic
AT5G54080	Q9ZRA2	25.1419	25.1039	24.9294	25.6012	24.895	24.4624	24.5926	24.6679	22.8901	23.4814	22.4288	23.7293	24.5791	23.0216	22.2066	3	3	11.3	11.3	51.455	Homogentisate 1,2-dioxygenase
AT4G02510	O81283	22.1372	23.558	23.1207	23.9122	22.8987	23.2802	23.6703	23.8372	23.6921	22.9778	23.5163	24.1535	26.4149	26.1921	25.9319	4	4	5.9	5.9	160.82	Translocase of chloroplast 159, chloroplastic
AT4G00810	O23095	23.7696	22.732	23.9495	22.9362	24.5676	25.0337	23.0986	23.4022	23.9147	23.9673	25.1697	24.1146	25.4895	23.4919	25.8053	3	3	74.3	74.3	11.307	60S acidic ribosomal protein P1-2
AT1G68010	Q9C9W5	23.8737	23.7983	23.2444	23.6306	24.0149	23.9323	23.6437	23.2425	23.557	24.6427	24.1471	23.3897	25.4589	26.3261	25.6229	6	6	22	22	42.247	Glycerate dehydrogenase HPR, peroxisomal
AT3G16430	O04313	24.4581	23.828	23.1705	23.748	22.8694	24.4331	23.7401	24.2882	22.605	23.8524	25.0819	24.3563	25.687	25.7321	25.5723	6	2	34.5	19.3	32.233	PYK10-binding protein 2
AT5G15230	A8MQL8	23.8578	23.7601	23.2045	23.6761	24.052	24.2259	24.2315	24.3947	23.6839	22.9906	23.1232	24.1533	25.6764	25.9854	25.7035	2	2	21.7	21.7	9.4099	Gibberellin-regulated protein 4
AT5G57020	Q9LTR9	23.8486	24.19	23.0684	23.7727	23.3562	23.2688	24.0022	24.2544	23.869	25.6433	25.5782	24.9292	24.9629	24.0857	24.2719	4	4	14.3	14.3	49.798	Glycylpeptide N-tetradecanoyltransferase 1
AT1G78850	Q9ZVA4	24.9381	24.046	24.0792	24.1337	24.2417	24.4736	24.4833	23.6163	24.2252	23.7492	24.0322	23.2971	25.9452	25.8739	25.6422	2	2	4.8	4.8	49.051
AT2G03870	Q9SI54	24.8925	23.2798	23.3568	23.3194	23.5562	22.3895	22.5738	23.0976	23.9346	24.0221	22.1893	23.1027	25.9642	26.0295	25.726	2	2	15.2	15.2	10.773	Sm-like protein LSM7
AT4G39090	P43296	23.719	24.4202	22.7102	24.2276	23.1425	24.4715	24.4598	23.8331	22.4683	23.9282	22.788	23.4688	25.4123	25.4085	25.4141	4	4	16.8	16.8	40.418	Cysteine proteinase RD19a
AT5G40760	Q9FJI5	24.6709	24.4604	24.7204	24.0918	24.7867	24.4408	25.002	24.5277	24.2038	23.3272	24.0065	22.726	23.2639	24.6869	23.1616	5	5	15.9	15.9	59.116	Glucose-6-phosphate 1-dehydrogenase, cytoplasmic isoform 2
AT1G24450	Q9FYL8	24.9662	24.8165	24.6921	25.4398	24.5708	24.3705	23.3778	23.3799	23.3028	23.1645	23.7876	24.1385	25.1828	23.6254	22.5933	4	4	30.9	30.9	20.742	Protein NUCLEAR FUSION DEFECTIVE 2
AT2G35780	Q9ZQQ0	25.5104	23.6913	23.5402	23.2047	24.4267	23.0302	22.5759	24.0983	23.3324	23.4129	24.4394	24.1288	25.9929	26.1262	25.8176	3	3	7.5	7.5	51.521	Serine carboxypeptidase-like 26
AT5G26260	O81493	24.5654	23.5261	23.1785	24.9909	22.9509	22.503	24.4717	24.113	23.339	24.1826	23.7552	24.3229	25.3876	25.3865	25.7164	4	3	17.4	14.2	39.826
AT5G19760	Q9C5M0	23.5166	24.1782	24.1207	24.0785	22.8427	23.8169	24.0327	23.2706	23.4587	26.3175	24.6336	25.5252	24.5586	23.5789	23.3153	2	2	7.4	7.4	31.912	Mitochondrial dicarboxylate/tricarboxylate transporter DTC
AT3G02760	F4IYF8	23.3873	23.6386	23.98	24.7729	24.0572	24.4525	22.8154	25.05	24.7159	24.4919	24.8059	24.5296	23.6121	23.3151	23.222	5	5	7.7	7.7	97.536
AT2G36250	O82533	22.3109	23.903	23.2669	24.2366	23.6473	23.8558	25.0081	24.943	23.6102	25.0796	25.102	23.5974	25.7275	25.3574	25.3667	6	3	24.7	13.4	50.721	Cell division protein FtsZ homolog 2-1, chloroplastic
AT5G49190	Q00917	24.3291	25.0859	24.5302	24.1118	23.0228	22.8845	24.8904	24.7066	25.1041	23.0513	23.4081	23.3362	23.0566	23.2462	22.787	4	3	5.8	4.5	92.063	Sucrose synthase 2
AT2G45240	Q9SLN5	24.5064	24.4329	23.7934	23.8504	24.1751	23.9527	23.7417	24.479	23.566	25.0004	25.4187	25.2484	24.5416	23.023	23.8326	3	3	10.6	10.6	43.992	Methionine aminopeptidase 1A
AT5G22810	Q9FFC6	24.4824	23.0955	25.2787	25.2255	24.5303	25.0825	24.5696	23.9944	24.9853	22.3424	23.4069	24.0341	24.3567	22.2456	23.501	2	2	9.7	9.7	39.54	GDSL esterase/lipase At5g22810
AT1G24180	Q8H1Y0	24.9082	22.9946	24.0418	23.8557	23.8263	23.3335	23.867	24.0708	24.1486	25.4321	24.6099	24.5659	23.075	23.0055	24.239	3	2	10.2	6.6	43.358	Pyruvate dehydrogenase E1 component subunit alpha-2, mitochondrial
AT4G30810	Q949Q7	24.6637	22.0369	23.7391	23.8391	23.1795	24.083	23.9956	23.9888	23.4005	23.3897	25.0135	25.4125	25.1601	25.232	25.0691	4	4	18.6	18.6	53.055	Serine carboxypeptidase-like 29
AT5G64120	Q43387	23.0193	23.2223	22.688	23.6731	23.6903	24.4368	24.5074	23.2187	22.3315	24.6237	24.9393	23.9325	26.0058	25.435	25.7597	4	4	19.2	19.2	34.889	Peroxidase 71
AT2G47940	B3H581	23.5886	24.2829	24.2825	24.1961	24.1049	24.135	22.7716	23.3725	23.3011	22.9179	22.9538	23.448	25.1914	25.0478	25.1806	4	4	12.9	12.9	66.673	Protease Do-like 2, chloroplastic
AT4G31120	Q8GWT4	23.3086	22.7459	24.4639	24.3117	23.7514	22.0694	25.1871	25.2762	25.2605	24.2982	24.1155	23.6764	24.1959	23.7761	23.8679	2	2	7.2	7.2	65.097	Protein arginine N-methyltransferase 1.5
AT5G39320	Q9FM01	24.1772	24.6601	23.8442	24.0376	24.7398	23.6407	24.1224	23.6632	22.857	25.3782	24.8994	25.0577	24.6243	24.8258	25.1066	9	3	24.4	8.1	53.096	UDP-glucose 6-dehydrogenase 4
AT2G47640	O22247	23.057	24.4375	22.9361	23.9672	24.1743	23.6279	23.9698	23.5475	22.7249	22.6924	25.1779	24.2909	25.4901	25.3907	25.6861	2	2	22.2	22.2	12.507
AT1G12520	Q9LD47	23.5922	24.5757	23.254	24.6366	24.2339	22.9777	24.0932	23.8096	24.6198	24.708	23.8352	23.0889	25.5115	25.6756	24.9366	2	2	22.3	22.3	19.489	Copper chaperone for superoxide dismutase, chloroplastic/cytosolic
ATCG00470	P09468	23.345	23.4928	23.7161	23.6487	23.8783	23.0508	23.0222	22.9363	25.9403	23.5716	24.3456	23.52	26.0431	26.033	26.1048	3	3	36.4	36.4	14.499	ATP synthase epsilon chain, chloroplastic
AT1G16890	Q9FZ48	24.2953	23.968	24.2571	23.4301	23.9826	23.4643	23.6367	23.8305	23.7388	24.8151	23.5997	23.6427	25.9354	25.3154	25.3879	3	2	38.6	22.2	17.22	Ubiquitin-conjugating enzyme E2 36
AT5G02790	Q9LZ06	23.5261	24.4541	25.0013	23.2044	24.041	23.556	23.9987	22.763	25.0404	23.2479	22.8416	24.4274	25.8374	26.1806	26.0131	3	3	26	26	27.09	Glutathione S-transferase L3
AT5G66720	Q9LVQ8	22.7845	23.991	23.9399	23.0005	22.5572	24.1498	23.5659	24.3841	23.8653	22.5439	23.3154	24.2092	25.9337	25.5172	25.4733	2	2	8	8	43.516	Probable protein phosphatase 2C 80
AT3G57560	Q9SCL7	23.9564	23.7576	24.092	23.8579	24.6051	24.2902	23.5754	23.8455	23.3649	22.8283	23.7771	24.137	23.8975	23.3581	24.0662	3	3	21	21	36.595	Acetylglutamate kinase, chloroplastic
AT2G47580	Q39244	23.7837	23.9755	23.9684	23.3772	23.9347	24.6421	24.1871	23.0404	24.0775	24.3627	24.3785	24.3844	25.416	23.6165	22.7741	2	2	7.6	7.6	28.074	U1 small nuclear ribonucleoprotein A
AT5G20400	Q84K82	24.28	23.6637	24.2378	23.9917	24.1081	25.2029	24.0819	23.9507	24.0628	24.813	22.6859	24.7158	25.3907	25.6516	25.4373	2	2	6.6	6.6	39.677
AT4G05450	Q9M0V0	23.7634	23.4744	23.3678	24.3954	24.6018	24.8072	24.1894	23.7179	23.4818	24.9947	22.872	23.3757	25.2861	25.2517	24.9681	2	2	13.7	13.7	21.83	Adrenodoxin-like protein 1, mitochondrial;Adrenodoxin-like protein 2, mitochondrial
AT5G39580	Q9FKA4	23.4533	24.2417	23.7727	23.6966	24.455	23.5734	23.4387	24.2649	23.2111	25.1667	25.033	24.7576	23.7051	25.0994	25.1729	3	3	19.1	19.1	34.133	Peroxidase 62
AT5G51820	Q9SCY0	25.0036	23.1649	24.2662	23.2797	23.3486	23.8722	26.5741	24.7671	23.2441	24.1806	23.1716	24.5712	24.6316	25.8892	24.7219	2	2	6.4	6.4	67.988	Phosphoglucomutase, chloroplastic
AT3G52200	F4J5T2	23.0008	23.18	23.775	23.6985	24.178	24.8578	24.2615	23.2466	22.1986	24.7031	23.0855	24.4823	24.9996	24.7992	24.7298	5	5	10.9	10.9	77.893	Dihydrolipoyllysine-residue acetyltransferase component 1 of pyruvate dehydrogenase complex, mitochondrial
AT2G20360	Q9SK66	24.882	24.2415	23.4473	23.1252	24.0246	23.4428	23.125	24.7955	23.2873	25.094	24.8674	23.7777	24.717	25.0391	24.8018	6	6	21.4	21.4	43.935	NADH dehydrogenase [ubiquinone] 1 alpha subcomplex subunit 9, mitochondrial
AT4G39960	Q940V1	25.0992	24.8711	24.3117	24.161	24.6096	23.9409	23.0505	22.5521	24.2259	24.5159	23.7314	24.1609	25.927	25.6141	25.7587	5	4	12.8	10.5	48.031
AT1G15690	P31414	24.4732	24.4188	23.3894	22.9004	23.5293	23.8939	23.5028	25.014	23.839	25.9236	24.6641	25.2679	22.9879	24.4801	23.6535	5	5	10.8	10.8	80.819	Pyrophosphate-energized vacuolar membrane proton pump 1
AT5G47190	Q8RXX5	23.1708	24.1309	22.6953	23.9045	23.6465	24.5307	23.8713	22.9933	22.8273	22.8089	23.6608	24.0569	26.1358	26.1557	25.5443	3	3	11.4	11.4	25.468	50S ribosomal protein L19-2, chloroplastic
AT5G45830	A0SVK0	24.8387	25.0841	24.5406	24.6138	25.4449	24.3162	24.4031	24.3492	23.8733	23.3397	23.4926	25.1073	23.9746	24.2889	22.6453	2	2	6.9	6.9	30.65
AT1G61520	Q9SY97	22.9975	24.398	23.5233	23.157	23.4156	23.5669	23.5619	23.8087	23.976	23.7176	23.726	23.812	23.3091	26.9747	25.2333	2	2	19.7	19.7	23.746
AT5G19220	P55229	24.0485	24.0034	24.0495	23.1412	24.0594	23.889	22.4537	24.5178	23.8742	24.2049	23.8793	23.5714	23.4213	24.5446	23.5751	2	2	5.2	5.2	57.673	Glucose-1-phosphate adenylyltransferase large subunit 1, chloroplastic
AT4G33010	Q94B78	24.5657	24.7324	23.4401	22.4975	23.9167	23.5514	23.7663	22.8658	24.0018	23.3757	23.9395	24.5859	25.0001	25.0269	24.9473	10	3	16.7	6.6	112.92	Glycine dehydrogenase (decarboxylating) 1, mitochondrial
AT1G20950	Q9SYP2	23.826	25.1928	23.6383	24.0257	24.574	25.7204	23.7203	24.2167	25.1734	25.2827	25.1981	25.0045	23.7611	24.8686	24.6429	4	4	8	8	67.118	Pyrophosphate--fructose 6-phosphate 1-phosphotransferase subunit alpha 1;Pyrophosphate--fructose 6-phosphate 1-phosphotransferase subunit alpha 2
AT1G55480	Q94BS2	24.9556	24.2313	23.0186	23.7941	24.9239	25.1595	24.444	23.1865	24.1504	23.3238	23.4281	24.2533	24.8323	24.3502	24.847	5	5	26	26	37.41
AT1G56190	F4I3L1	23.7304	24.3609	23.7767	23.4935	22.5132	23.7834	23.0093	23.299	23.052	24.5654	23.9214	24.6999	25.9442	25.8196	25.8236	16	4	44	15.6	42.615	Phosphoglycerate kinase;Phosphoglycerate kinase 2, chloroplastic
AT2G40060	O04209	24.8679	23.2174	22.8254	24.1841	23.8422	24.4924	23.4056	25.3213	23.8578	23.2996	23.0297	24.1264	25.7084	25.6658	25.4017	2	2	11.6	11.6	28.837	Clathrin light chain 2
AT2G44620	P53665	23.4217	22.9254	22.9699	23.8433	23.616	23.7165	23.6754	24.0081	24.12	24.6634	24.7745	24.2732	24.8594	24.6889	24.7505	1	1	9.8	9.8	13.717	Acyl carrier protein 1, mitochondrial
AT1G43780	Q9MAR8	23.3574	24.8704	23.147	22.9001	25.3674	23.6214	23.2801	22.9345	25.1773	24.8467	25.3697	25.3664	24.1671	23.9422	24.5526	3	3	10.2	10.2	53.922	Serine carboxypeptidase-like 44
AT4G30160	O65570	22.8873	23.708	24.0535	23.2763	23.3015	23.3466	23.6672	23.3248	22.5082	23.0162	23.148	23.5284	24.6409	24.7135	24.5397	3	3	3.6	3.6	109.33	Villin-4
AT4G31500	O65782	24.3282	24.5505	24.2773	23.1056	23.1568	23.7233	23.6888	24.2014	24.5326	25.6863	24.9241	24.8872	22.7555	24.5664	23.3085	4	4	11.8	11.8	56.846	Cytochrome P450 83B1
AT3G54640	Q42529	23.6718	23.6736	24.0022	22.6907	25.0068	23.6944	23.7185	24.1057	22.91	23.1966	25.3746	25.5837	23.8782	22.7646	23.9346	4	4	24	24	33.199	Tryptophan synthase alpha chain, chloroplastic
AT3G02110	Q8L9Y0	22.6397	22.7428	22.3696	23.9162	23.934	25.1681	22.8167	23.4714	23.9141	23.2896	23.504	24.4039	25.5701	25.1085	25.7128	2	2	5.1	5.1	53.4	Serine carboxypeptidase-like 25
AT1G52740	Q9C944	24.4322	24.2467	22.9394	23.0601	23.339	22.2341	24.0098	23.9189	23.2367	24.9244	23.9689	24.9324	23.2225	23.5981	23.9374	3	1	41	21.6	14.271	Probable histone H2A variant 3
AT4G39040	F4JV86	23.4891	22.892	24.5091	24.4421	24.6423	23.1987	24.8891	23.9974	24.5839	24.3786	24.202	24.5478	24.91	24.6795	25.1865	4	4	21.4	21.4	31.562
AT2G30950	O80860	23.4198	23.609	22.9452	23.1199	24.0852	21.9748	24.4994	24.7353	22.7157	24.5766	24.3129	23.9976	24.9976	24.7753	24.9266	5	5	10.4	10.4	74.157	ATP-dependent zinc metalloprotease FTSH 2, chloroplastic;ATP-dependent zinc metalloprotease FTSH 8, chloroplastic
AT4G38510	F4JTQ0	22.7963	24.8119	23.8609	23.5334	24.6726	22.986	24.4179	23.7174	23.2325	24.7093	24.3373	23.8591	25.3139	25.32	25.2388	23	3	66	10.9	55.177	V-type proton ATPase subunit B2
AT5G45930	Q5XF33	23.5237	24.4212	24.8182	25.431	22.9578	23.3901	23.3624	24.0509	23.4233	22.7728	24.7021	23.6632	24.9015	25.3708	25.1374	14	4	53.3	20.3	46.097	Magnesium-chelatase subunit ChlI-2, chloroplastic
AT1G54000	Q1H583	24.3388	23.5348	23.0756	24.9308	24.0232	23.666	23.6625	22.9864	22.7022	24.7284	24.41	24.7016	23.6774	22.9555	24.1063	4	2	14.6	8.4	43.194	GDSL esterase/lipase 22
AT5G36230	Q93ZC2	22.7509	24.2352	23.7975	25.0632	23.5304	24.8242	24.1795	23.7694	24.1379	24.1896	24.0215	23.961	23.65	24.188	23.9229	6	6	21.7	21.7	47.215
AT1G54580	P25701	22.6562	24.4553	24.6796	24.4603	22.4561	22.0928	23.7281	24.0111	22.5534	23.0388	24.227	22.7503	24.9382	24.4509	23.9766	1	1	15.4	15.4	14.528	Acyl carrier protein 2, chloroplastic
AT5G14660	Q9FUZ2	23.1459	24.3399	23.1209	23.7565	23.4146	23.1727	23.5742	24.0329	23.5605	23.9445	24.1811	22.8706	25.6026	25.8006	25.619	3	3	14.7	14.7	30.61	Peptide deformylase 1B, chloroplastic/mitochondrial
ATCG01120	P56805	24.4796	25.0764	22.7392	24.309	23.7164	22.7988	22.5701	24.2759	24.5363	23.0937	23.8982	24.5282	25.9379	25.5658	25.489	2	2	28.4	28.4	10.718	30S ribosomal protein S15, chloroplastic
AT2G41680	O22229	24.4043	24.8186	23.4433	23.9159	24.9231	23.2249	24.0687	24.5241	24.3428	23.4068	23.9149	23.4605	25.3584	25.4853	25.1089	4	4	16.3	16.3	57.949	NADPH-dependent thioredoxin reductase 3
AT3G44620	Q67YE7	23.6498	23.9829	23.9034	23.56	23.223	23.3515	24.028	23.1882	23.6197	23.575	23.7119	23.9791	25.6364	25.5	25.4273	2	2	10.5	10.5	26.95
AT3G19130	Q0WW84	23.2563	24.3575	23.2073	24.4341	23.2628	23.0291	23.9018	23.8524	23.6451	23.9811	24.4228	24.056	24.0392	23.7871	24.2852	3	3	20.7	20.7	48.118	Polyadenylate-binding protein RBP47B
AT5G42950	Q9FMM3	23.7439	25.6578	23.2275	24.2355	23.6853	23.0712	23.7107	23.6804	23.3889	23.822	23.6068	23.4358	25.1821	25.455	24.8381	5	5	4.1	4.1	187.62
AT2G32080	Q9SKZ1	23.3521	24.9024	23.5962	24.7215	22.9692	23.1462	23.1927	23.1384	23.2864	23.0641	23.9173	24.6224	25.063	24.8898	24.7152	5	5	17.6	17.6	32.101	Transcription factor Pur-alpha 1
AT3G07050	Q9M8Z5	23.5838	23.6874	22.3008	24.1511	23.1636	24.1389	23.6075	23.7755	23.8969	24.7423	24.9986	24.603	23.7543	24.1179	23.4162	3	3	7.7	7.7	65.785	Guanine nucleotide-binding protein-like NSN1
AT2G09990	Q9SK22	24.6417	24.4595	23.1742	22.9955	24.7024	24.6803	23.098	25.3225	23.7339	24.7578	24.6932	24.6627	23.575	23.391	23.6231	6	2	29.5	8.2	16.631	40S ribosomal protein S16-1
AT5G27380	P46416	24.4761	23.4864	23.8276	23.5166	23.9665	23.7021	24.4132	24.7507	24.2187	23.4843	24.5937	22.6048	24.1926	23.8536	24.1902	5	5	16	16	60.27	Glutathione synthetase, chloroplastic
AT4G01940	Q93W77	24.6483	23.2824	24.6446	24.3129	23.4497	23.7539	23.1693	23.4203	24.366	23.8776	23.2367	24.8776	25.3381	24.3266	24.3527	2	2	11.7	11.7	24.768	NifU-like protein 1, chloroplastic
AT3G07100	Q9SFU0	24.6674	23.7063	23.2089	24.4911	24.1295	23.6373	24.3511	24.2391	24.1377	24.4689	24.1309	24.4889	24.4238	23.4382	22.9353	3	3	2.5	2.5	113.96	Protein transport protein Sec24-like At3g07100
AT2G39140	Q8L960	23.4795	23.2679	23.0959	24.9084	24.2602	24.1111	23.6475	24.5515	23.238	24.6005	24.1655	24.9245	23.1893	24.5065	24.2359	2	2	10	10	45.107
AT1G17020	Q39224	23.5056	24.1163	24.1386	25.1618	23.5421	22.4981	22.7455	23.8898	24.3609	24.7894	24.9933	25.5236	24.1812	23.7435	22.9538	4	4	22.3	22.3	41.039	Protein SRG1
AT4G26010	Q93V93	24.4654	23.3339	23.9061	23.6037	23.2153	24.1868	24.2256	23.3974	24.7761	23.5191	23.2543	24.4034	25.4926	25.4098	25.658	4	4	18.4	18.4	33.805	Peroxidase 44
AT1G04420	Q8VZ23	24.1191	24.5467	22.7525	22.9205	23.9677	24.0023	24.3388	24.4059	23.9945	23.7345	23.4152	23.4139	24.3562	25.3057	25.678	3	3	10	10	46.427
AT3G01480	Q9SSA5	24.4681	24.5998	22.8488	23.9922	25.1913	24.7372	25.1751	24.0769	23.9759	23.4039	24.0566	24.4738	24.0991	24.3102	25.9778	4	4	16.5	16.5	47.981	Peptidyl-prolyl cis-trans isomerase CYP38, chloroplastic
AT1G74910	F4HXD1	23.371	23.3914	23.893	23.1821	23.0439	24.3952	23.5816	24.0865	24.0274	24.1962	24.6788	24.4303	24.2028	24.2193	24.7668	3	3	10.6	10.6	42.896
AT2G27680	Q9ZUX0	23.38	22.8901	22.7234	23.7614	23.7337	24.6016	23.5139	23.9165	23.0146	24.2761	24.8164	23.7589	24.2608	24.0244	24.0179	4	4	19.8	19.8	43.154
AT2G34430	Q39142	24.4312	24.4816	24.1579	23.6757	22.5564	25.3399	23.239	23.8413	24.3067	23.6377	23.9921	23.1302	25.7562	25.5946	24.8102	8	1	61.3	6.4	28.17
AT1G64110	Q940D1	24.3706	24.7787	24.8879	24.5347	24.6705	24.5099	24.0927	23.9592	23.0358	25.133	22.2398	23.7887	22.6269	24.0626	24.7086	2	2	4.5	4.5	91.96
AT3G21140	Q8L637	24.0624	23.5896	23.6174	23.8329	24.7374	23.8037	23.3832	23.9197	24.5362	23.6668	23.5229	23.6557	24.9931	24.7119	24.8161	2	2	9.3	9.3	42.851
AT2G03430	Q8GZ22	23.5306	23.9717	23.6084	23.5722	23.5465	23.0327	24.274	24.7104	23.1478	23.0944	23.8347	23.9752	24.5453	23.7699	23.4857	2	2	19.6	19.6	25.921
AT3G08940	Q9XF88	23.4378	23.2093	23.0453	24.326	23.6779	24.7046	23.7138	22.5728	23.0906	25.1555	23.817	25.1436	25.2971	25.1376	24.8259	2	2	10.1	10.1	31.193	Chlorophyll a-b binding protein CP29.2, chloroplastic
AT5G19940	F4K2P2	25.0722	22.7791	23.4963	24.9927	23.6314	23.7325	23.2264	24.1324	23.5597	23.6025	23.8174	24.0971	23.5194	25.972	25.5236	2	2	17	17	26.001	Probable plastid-lipid-associated protein 8, chloroplastic
AT5G10920	Q9LEU8	24.0641	23.9055	23.5313	23.4674	22.3177	23.7016	22.8014	22.4099	22.851	23.7976	22.8194	26.0706	23.4038	23.9079	22.3713	3	3	11.6	11.6	57.512	Argininosuccinate lyase, chloroplastic
AT3G26900	Q9LW20	22.9217	25.3729	21.9309	23.3648	23.7047	24.3773	23.5939	23.3073	24.1751	24.2324	22.7782	24.7726	25.2733	24.7949	24.7813	6	6	41.8	41.8	30.473	Probable inactive shikimate kinase like 1, chloroplastic
AT2G45990	O82790	23.6468	23.8056	24.1894	24.9912	24.1743	23.9495	24.2262	23.6774	23.81	23.2483	23.2204	23.4867	22.5743	23.4809	22.6137	2	2	15.3	15.3	30.112
AT5G27720	F4K4E3	24.255	23.1868	22.7512	24.6506	23.1741	24.1963	24.3275	23.3249	24.0682	23.8682	22.8505	22.9177	24.9555	25.0192	24.9719	2	2	18.6	18.6	14.323	Sm-like protein LSM4
AT3G12960	Q9LE44	23.8986	24.9848	23.9752	24.1925	23.4252	21.9027	21.7836	20.7993	21.599	21.1396	19.8904	21.2995	25.0079	24.2053	24.2754	1	1	22.1	22.1	9.4643
AT5G16730	Q9LFE4	23.8976	23.2681	23.8863	23.9972	23.4741	24.0914	22.8185	24.5266	24.5017	23.8232	23.5974	24.7571	25.0159	24.9399	24.8393	4	4	8	8	96.207	WEB family protein At5g16730, chloroplastic
AT1G30690	Q94C59	24.3634	23.8135	22.91	24.3286	24.5073	23.1183	23.0977	22.8077	23.1477	23.1639	23.0256	24.2538	24.7532	24.9424	24.7937	2	2	6.1	6.1	61.189	Patellin-4
AT5G67240	F4K3N3	23.5917	24.4145	23.9831	23.5401	23.4214	22.5472	23.6096	24.5364	24.2361	23.9922	23.563	24.7019	23.5763	23.2886	24.3222	1	1	1.8	1.8	85.175	Small RNA degrading nuclease 3
AT3G07880	Q9SFC6	23.6603	23.2805	24.4923	23.4707	23.4278	23.8363	23.101	24.5827	23.9622	24.0868	23.1194	24.1986	24.4067	25.1572	24.2847	2	2	8.8	8.8	27.231	Rho GDP-dissociation inhibitor 1
AT2G25770	O82320	22.5206	22.7891	23.003	22.7055	22.9158	24.9541	23.8232	24.5155	23.8149	20.8367	24.4178	24.2679	22.5146	22.7807	23.6885	1	1	10.8	10.8	18.798
AT4G23650	Q42479	23.4854	22.4464	23.5473	23.7369	23.8756	23.9713	23.2772	24.2765	23.7392	24.0949	23.0836	22.5156	23.834	24.6047	24.0008	3	3	10	10	59.336	Calcium-dependent protein kinase 3
AT4G20960	Q8GWP5	24.6318	23.2794	25.1617	24.0502	23.4667	22.5421	24.1763	23.9338	23.1415	23.7003	22.9656	22.9703	23.3596	23.5847	23.6729	2	2	4.9	4.9	46.673	Riboflavin biosynthesis protein PYRD, chloroplastic;Diaminohydroxyphosphoribosylaminopyrimidine deaminase;Inactive 5-amino-6-(5-phosphoribosylamino)uracil reductase
AT1G76450	Q9S720	22.9922	22.2941	24.2425	22.9545	22.7888	24.23	23.4636	23.8634	25.093	22.6802	23.1106	21.8512	24.4825	24.8582	23.9234	2	2	12.6	12.6	27.489	PsbP domain-containing protein 3, chloroplastic
AT1G31812	P57752	23.3555	23.7467	23.8928	23.9118	24.1091	23.256	24.1028	24.2394	24.28	24.0033	24.6514	23.2437	24.5657	24.871	24.3842	2	2	48.9	48.9	10.386	Acyl-CoA-binding domain-containing protein 6
AT5G09620	Q9LXC6	22.8874	23.4902	23.8981	23.2503	24.0333	24.5121	22.9031	24.2332	24.2976	23.1371	22.2993	23.3425	24.4491	25.0295	24.1504	3	2	10.2	7	59.66
AT3G16470	A0A1I9LQM9	23.5605	23.2153	24.243	23.2346	24.1343	23.94	24.2282	23.7101	24.2554	23.9238	24.2182	23.996	24.4187	24.3448	24.4808	2	2	9.8	9.8	31.984	Jacalin-related lectin 35
AT1G74260	Q9M8D3	25.3412	23.0029	24.3186	23.796	23.4274	24.8559	23.4732	22.8578	23.4903	23.2038	23.465	24.2432	24.4087	22.8335	23.4854	4	4	5.8	5.8	153.95	Probable phosphoribosylformylglycinamidine synthase, chloroplastic/mitochondrial
AT4G00620	O65271	24.447	25.3135	22.8927	23.307	23.5847	24.478	23.8885	22.9773	23.6535	23.9251	23.0338	23.2918	23.1626	23.3992	22.5534	4	4	25	25	38.741	Bifunctional protein FolD 4, chloroplastic;Methylenetetrahydrofolate dehydrogenase;Methenyltetrahydrofolate cyclohydrolase
AT2G06050	Q9FUP0	25.187	25.05	23.4426	24.2736	22.7468	23.0712	24.4257	23.6334	23.6041	24.006	23.2847	24.3669	25.0214	22.7971	22.9644	2	2	12.3	12.3	42.691	12-oxophytodienoate reductase 3
AT1G07830	Q94JQ7	23.1002	23.7498	22.0287	23.9656	23.4776	21.8418	23.4323	23.7467	23.5032	22.8776	22.5197	23.9922	22.9249	23.2801	22.8977	2	2	22.9	22.9	16.886
AT2G47450	O22265	22.9634	23.1187	24.5164	24.1745	23.2883	23.5692	24.1873	23.0352	24.6835	25.0205	23.1386	21.4973	22.7924	23.3347	23.3701	2	2	15.3	15.3	41.279	Signal recognition particle 43 kDa protein, chloroplastic

## Sheet: Supplemental Table 2
Samples	Total protein (ug)	Methanol/Chloroform (ug)	Acetone precipitation (ug)	Methanol/Chloroform revocery rate	Acetone recovery rate
1	1098.26	1030.39	67.8759	0.938197	0.0618029
2	1401.1	1337.04	64.0641	0.954276	0.045724
3	1391.64	1297.54	94.0983	0.932383	0.0676168

## Sheet: Supplemental Table 3
AGI	Regulation	Expression Level
AT1G01050	Dry-6 Up	Polysomal mRNA
AT1G02500	Dry-6 Up	Polysomal mRNA
AT1G02780	Dry-6 Up	Polysomal mRNA
AT1G02920	Dry-6 Up	Polysomal mRNA
AT1G02930	Dry-6 Up	Polysomal mRNA
AT1G03220	Dry-6 Up	Polysomal mRNA
AT1G04410	Dry-6 Up	Polysomal mRNA
AT1G04850	Dry-6 Up	Polysomal mRNA
AT1G05190	Dry-6 Up	Polysomal mRNA
AT1G07140	Dry-6 Up	Polysomal mRNA
AT1G07320	Dry-6 Up	Polysomal mRNA
AT1G07770	Dry-6 Up	Polysomal mRNA
AT1G07830	Dry-6 Up	Polysomal mRNA
AT1G07890	Dry-6 Up	Polysomal mRNA
AT1G07930	Dry-6 Up	Polysomal mRNA
AT1G08360	Dry-6 Up	Polysomal mRNA
AT1G08830	Dry-6 Up	Polysomal mRNA
AT1G09340	Dry-6 Up	Polysomal mRNA
AT1G09780	Dry-6 Up	Polysomal mRNA
AT1G10590	Dry-6 Up	Polysomal mRNA
AT1G10960	Dry-6 Up	Polysomal mRNA
AT1G12000	Dry-6 Up	Polysomal mRNA
AT1G12270	Dry-6 Up	Polysomal mRNA
AT1G12410	Dry-6 Up	Polysomal mRNA
AT1G12780	Dry-6 Up	Polysomal mRNA
AT1G13270	Dry-6 Up	Polysomal mRNA
AT1G14320	Dry-6 Up	Polysomal mRNA
AT1G14980	Dry-6 Up	Polysomal mRNA
AT1G15930	Dry-6 Up	Polysomal mRNA
AT1G16470	Dry-6 Up	Polysomal mRNA
AT1G17020	Dry-6 Up	Polysomal mRNA
AT1G17290	Dry-6 Up	Polysomal mRNA
AT1G17650	Dry-6 Up	Polysomal mRNA
AT1G17880	Dry-6 Up	Polysomal mRNA
AT1G18070	Dry-6 Up	Polysomal mRNA
AT1G18080	Dry-6 Up	Polysomal mRNA
AT1G18540	Dry-6 Up	Polysomal mRNA
AT1G18800	Dry-6 Up	Polysomal mRNA
AT1G20200	Dry-6 Up	Polysomal mRNA
AT1G20580	Dry-6 Up	Polysomal mRNA
AT1G20950	Dry-6 Up	Polysomal mRNA
AT1G21720	Dry-6 Up	Polysomal mRNA
AT1G22300	Dry-6 Up	Polysomal mRNA
AT1G22450	Dry-6 Up	Polysomal mRNA
AT1G22530	Dry-6 Up	Polysomal mRNA
AT1G22780	Dry-6 Up	Polysomal mRNA
AT1G22840	Dry-6 Up	Polysomal mRNA
AT1G23820	Dry-6 Up	Polysomal mRNA
AT1G24360	Dry-6 Up	Polysomal mRNA
AT1G24510	Dry-6 Up	Polysomal mRNA
AT1G26630	Dry-6 Up	Polysomal mRNA
AT1G27090	Dry-6 Up	Polysomal mRNA
AT1G27310	Dry-6 Up	Polysomal mRNA
AT1G27400	Dry-6 Up	Polysomal mRNA
AT1G27450	Dry-6 Up	Polysomal mRNA
AT1G27970	Dry-6 Up	Polysomal mRNA
AT1G30230	Dry-6 Up	Polysomal mRNA
AT1G30630	Dry-6 Up	Polysomal mRNA
AT1G30690	Dry-6 Up	Polysomal mRNA
AT1G31812	Dry-6 Up	Polysomal mRNA
AT1G32200	Dry-6 Up	Polysomal mRNA
AT1G32990	Dry-6 Up	Polysomal mRNA
AT1G33040	Dry-6 Up	Polysomal mRNA
AT1G33120	Dry-6 Up	Polysomal mRNA
AT1G33790	Dry-6 Up	Polysomal mRNA
AT1G35160	Dry-6 Up	Polysomal mRNA
AT1G35680	Dry-6 Up	Polysomal mRNA
AT1G41880	Dry-6 Up	Polysomal mRNA
AT1G45000	Dry-6 Up	Polysomal mRNA
AT1G47200	Dry-6 Up	Polysomal mRNA
AT1G48630	Dry-6 Up	Polysomal mRNA
AT1G48830	Dry-6 Up	Polysomal mRNA
AT1G48920	Dry-6 Up	Polysomal mRNA
AT1G49600	Dry-6 Up	Polysomal mRNA
AT1G49760	Dry-6 Up	Polysomal mRNA
AT1G50480	Dry-6 Up	Polysomal mRNA
AT1G53240	Dry-6 Up	Polysomal mRNA
AT1G53580	Dry-6 Up	Polysomal mRNA
AT1G53850	Dry-6 Up	Polysomal mRNA
AT1G54580	Dry-6 Up	Polysomal mRNA
AT1G54630	Dry-6 Up	Polysomal mRNA
AT1G55480	Dry-6 Up	Polysomal mRNA
AT1G55490	Dry-6 Up	Polysomal mRNA
AT1G56110	Dry-6 Up	Polysomal mRNA
AT1G56190	Dry-6 Up	Polysomal mRNA
AT1G56700	Dry-6 Up	Polysomal mRNA
AT1G57660	Dry-6 Up	Polysomal mRNA
AT1G60710	Dry-6 Up	Polysomal mRNA
AT1G62390	Dry-6 Up	Polysomal mRNA
AT1G63940	Dry-6 Up	Polysomal mRNA
AT1G64190	Dry-6 Up	Polysomal mRNA
AT1G64520	Dry-6 Up	Polysomal mRNA
AT1G64970	Dry-6 Up	Polysomal mRNA
AT1G66070	Dry-6 Up	Polysomal mRNA
AT1G67090	Dry-6 Up	Polysomal mRNA
AT1G68560	Dry-6 Up	Polysomal mRNA
AT1G68590	Dry-6 Up	Polysomal mRNA
AT1G69250	Dry-6 Up	Polysomal mRNA
AT1G69620	Dry-6 Up	Polysomal mRNA
AT1G70310	Dry-6 Up	Polysomal mRNA
AT1G70410	Dry-6 Up	Polysomal mRNA
AT1G70600	Dry-6 Up	Polysomal mRNA
AT1G72150	Dry-6 Up	Polysomal mRNA
AT1G73230	Dry-6 Up	Polysomal mRNA
AT1G74030	Dry-6 Up	Polysomal mRNA
AT1G74060	Dry-6 Up	Polysomal mRNA
AT1G74100	Dry-6 Up	Polysomal mRNA
AT1G74230	Dry-6 Up	Polysomal mRNA
AT1G74560	Dry-6 Up	Polysomal mRNA
AT1G74970	Dry-6 Up	Polysomal mRNA
AT1G75270	Dry-6 Up	Polysomal mRNA
AT1G75280	Dry-6 Up	Polysomal mRNA
AT1G75330	Dry-6 Up	Polysomal mRNA
AT1G75350	Dry-6 Up	Polysomal mRNA
AT1G76810	Dry-6 Up	Polysomal mRNA
AT1G77440	Dry-6 Up	Polysomal mRNA
AT1G77710	Dry-6 Up	Polysomal mRNA
AT1G77940	Dry-6 Up	Polysomal mRNA
AT1G78300	Dry-6 Up	Polysomal mRNA
AT1G78370	Dry-6 Up	Polysomal mRNA
AT1G79340	Dry-6 Up	Polysomal mRNA
AT1G79550	Dry-6 Up	Polysomal mRNA
AT1G79850	Dry-6 Up	Polysomal mRNA
AT1G80460	Dry-6 Up	Polysomal mRNA
AT2G01140	Dry-6 Up	Polysomal mRNA
AT2G01250	Dry-6 Up	Polysomal mRNA
AT2G03430	Dry-6 Up	Polysomal mRNA
AT2G03870	Dry-6 Up	Polysomal mRNA
AT2G05220	Dry-6 Up	Polysomal mRNA
AT2G05840	Dry-6 Up	Polysomal mRNA
AT2G05990	Dry-6 Up	Polysomal mRNA
AT2G09990	Dry-6 Up	Polysomal mRNA
AT2G16430	Dry-6 Up	Polysomal mRNA
AT2G16600	Dry-6 Up	Polysomal mRNA
AT2G17360	Dry-6 Up	Polysomal mRNA
AT2G17390	Dry-6 Up	Polysomal mRNA
AT2G17420	Dry-6 Up	Polysomal mRNA
AT2G18020	Dry-6 Up	Polysomal mRNA
AT2G18040	Dry-6 Up	Polysomal mRNA
AT2G18110	Dry-6 Up	Polysomal mRNA
AT2G19480	Dry-6 Up	Polysomal mRNA
AT2G19730	Dry-6 Up	Polysomal mRNA
AT2G19760	Dry-6 Up	Polysomal mRNA
AT2G21660	Dry-6 Up	Polysomal mRNA
AT2G21870	Dry-6 Up	Polysomal mRNA
AT2G22780	Dry-6 Up	Polysomal mRNA
AT2G23350	Dry-6 Up	Polysomal mRNA
AT2G24020	Dry-6 Up	Polysomal mRNA
AT2G24200	Dry-6 Up	Polysomal mRNA
AT2G24580	Dry-6 Up	Polysomal mRNA
AT2G25670	Dry-6 Up	Polysomal mRNA
AT2G25840	Dry-6 Up	Polysomal mRNA
AT2G25970	Dry-6 Up	Polysomal mRNA
AT2G25980	Dry-6 Up	Polysomal mRNA
AT2G27020	Dry-6 Up	Polysomal mRNA
AT2G27530	Dry-6 Up	Polysomal mRNA
AT2G27710	Dry-6 Up	Polysomal mRNA
AT2G27720	Dry-6 Up	Polysomal mRNA
AT2G28000	Dry-6 Up	Polysomal mRNA
AT2G30050	Dry-6 Up	Polysomal mRNA
AT2G30060	Dry-6 Up	Polysomal mRNA
AT2G30620	Dry-6 Up	Polysomal mRNA
AT2G30970	Dry-6 Up	Polysomal mRNA
AT2G31570	Dry-6 Up	Polysomal mRNA
AT2G31610	Dry-6 Up	Polysomal mRNA
AT2G31670	Dry-6 Up	Polysomal mRNA
AT2G32060	Dry-6 Up	Polysomal mRNA
AT2G32520	Dry-6 Up	Polysomal mRNA
AT2G33210	Dry-6 Up	Polysomal mRNA
AT2G33845	Dry-6 Up	Polysomal mRNA
AT2G34040	Dry-6 Up	Polysomal mRNA
AT2G34470	Dry-6 Up	Polysomal mRNA
AT2G34480	Dry-6 Up	Polysomal mRNA
AT2G35040	Dry-6 Up	Polysomal mRNA
AT2G35605	Dry-6 Up	Polysomal mRNA
AT2G36530	Dry-6 Up	Polysomal mRNA
AT2G36880	Dry-6 Up	Polysomal mRNA
AT2G37270	Dry-6 Up	Polysomal mRNA
AT2G37660	Dry-6 Up	Polysomal mRNA
AT2G37760	Dry-6 Up	Polysomal mRNA
AT2G38230	Dry-6 Up	Polysomal mRNA
AT2G38700	Dry-6 Up	Polysomal mRNA
AT2G39080	Dry-6 Up	Polysomal mRNA
AT2G39390	Dry-6 Up	Polysomal mRNA
AT2G39990	Dry-6 Up	Polysomal mRNA
AT2G40290	Dry-6 Up	Polysomal mRNA
AT2G40660	Dry-6 Up	Polysomal mRNA
AT2G41680	Dry-6 Up	Polysomal mRNA
AT2G41840	Dry-6 Up	Polysomal mRNA
AT2G42910	Dry-6 Up	Polysomal mRNA
AT2G43090	Dry-6 Up	Polysomal mRNA
AT2G43460	Dry-6 Up	Polysomal mRNA
AT2G43560	Dry-6 Up	Polysomal mRNA
AT2G44120	Dry-6 Up	Polysomal mRNA
AT2G44620	Dry-6 Up	Polysomal mRNA
AT2G44650	Dry-6 Up	Polysomal mRNA
AT2G45790	Dry-6 Up	Polysomal mRNA
AT2G45990	Dry-6 Up	Polysomal mRNA
AT2G46280	Dry-6 Up	Polysomal mRNA
AT2G47400	Dry-6 Up	Polysomal mRNA
AT2G47450	Dry-6 Up	Polysomal mRNA
AT2G47510	Dry-6 Up	Polysomal mRNA
AT2G47580	Dry-6 Up	Polysomal mRNA
AT2G47610	Dry-6 Up	Polysomal mRNA
AT2G47710	Dry-6 Up	Polysomal mRNA
AT3G01280	Dry-6 Up	Polysomal mRNA
AT3G02080	Dry-6 Up	Polysomal mRNA
AT3G02230	Dry-6 Up	Polysomal mRNA
AT3G02520	Dry-6 Up	Polysomal mRNA
AT3G02560	Dry-6 Up	Polysomal mRNA
AT3G02760	Dry-6 Up	Polysomal mRNA
AT3G02870	Dry-6 Up	Polysomal mRNA
AT3G04790	Dry-6 Up	Polysomal mRNA
AT3G04840	Dry-6 Up	Polysomal mRNA
AT3G05060	Dry-6 Up	Polysomal mRNA
AT3G05190	Dry-6 Up	Polysomal mRNA
AT3G05530	Dry-6 Up	Polysomal mRNA
AT3G05590	Dry-6 Up	Polysomal mRNA
AT3G07050	Dry-6 Up	Polysomal mRNA
AT3G07110	Dry-6 Up	Polysomal mRNA
AT3G07480	Dry-6 Up	Polysomal mRNA
AT3G08030	Dry-6 Up	Polysomal mRNA
AT3G08580	Dry-6 Up	Polysomal mRNA
AT3G08590	Dry-6 Up	Polysomal mRNA
AT3G08740	Dry-6 Up	Polysomal mRNA
AT3G09440	Dry-6 Up	Polysomal mRNA
AT3G09500	Dry-6 Up	Polysomal mRNA
AT3G09630	Dry-6 Up	Polysomal mRNA
AT3G09820	Dry-6 Up	Polysomal mRNA
AT3G10090	Dry-6 Up	Polysomal mRNA
AT3G10520	Dry-6 Up	Polysomal mRNA
AT3G11400	Dry-6 Up	Polysomal mRNA
AT3G11510	Dry-6 Up	Polysomal mRNA
AT3G11710	Dry-6 Up	Polysomal mRNA
AT3G11830	Dry-6 Up	Polysomal mRNA
AT3G11940	Dry-6 Up	Polysomal mRNA
AT3G12050	Dry-6 Up	Polysomal mRNA
AT3G12260	Dry-6 Up	Polysomal mRNA
AT3G12390	Dry-6 Up	Polysomal mRNA
AT3G12800	Dry-6 Up	Polysomal mRNA
AT3G13470	Dry-6 Up	Polysomal mRNA
AT3G13920	Dry-6 Up	Polysomal mRNA
AT3G14290	Dry-6 Up	Polysomal mRNA
AT3G14310	Dry-6 Up	Polysomal mRNA
AT3G14415	Dry-6 Up	Polysomal mRNA
AT3G15010	Dry-6 Up	Polysomal mRNA
AT3G16420	Dry-6 Up	Polysomal mRNA
AT3G17170	Dry-6 Up	Polysomal mRNA
AT3G17210	Dry-6 Up	Polysomal mRNA
AT3G17390	Dry-6 Up	Polysomal mRNA
AT3G17940	Dry-6 Up	Polysomal mRNA
AT3G18190	Dry-6 Up	Polysomal mRNA
AT3G18740	Dry-6 Up	Polysomal mRNA
AT3G19130	Dry-6 Up	Polysomal mRNA
AT3G20050	Dry-6 Up	Polysomal mRNA
AT3G23570	Dry-6 Up	Polysomal mRNA
AT3G23600	Dry-6 Up	Polysomal mRNA
AT3G24830	Dry-6 Up	Polysomal mRNA
AT3G25230	Dry-6 Up	Polysomal mRNA
AT3G25520	Dry-6 Up	Polysomal mRNA
AT3G25530	Dry-6 Up	Polysomal mRNA
AT3G26618	Dry-6 Up	Polysomal mRNA
AT3G27160	Dry-6 Up	Polysomal mRNA
AT3G44310	Dry-6 Up	Polysomal mRNA
AT3G44590	Dry-6 Up	Polysomal mRNA
AT3G44750	Dry-6 Up	Polysomal mRNA
AT3G44890	Dry-6 Up	Polysomal mRNA
AT3G45030	Dry-6 Up	Polysomal mRNA
AT3G45310	Dry-6 Up	Polysomal mRNA
AT3G46010	Dry-6 Up	Polysomal mRNA
AT3G47370	Dry-6 Up	Polysomal mRNA
AT3G47520	Dry-6 Up	Polysomal mRNA
AT3G48690	Dry-6 Up	Polysomal mRNA
AT3G48930	Dry-6 Up	Polysomal mRNA
AT3G49010	Dry-6 Up	Polysomal mRNA
AT3G49470	Dry-6 Up	Polysomal mRNA
AT3G49910	Dry-6 Up	Polysomal mRNA
AT3G51160	Dry-6 Up	Polysomal mRNA
AT3G51260	Dry-6 Up	Polysomal mRNA
AT3G51800	Dry-6 Up	Polysomal mRNA
AT3G52300	Dry-6 Up	Polysomal mRNA
AT3G52560	Dry-6 Up	Polysomal mRNA
AT3G52880	Dry-6 Up	Polysomal mRNA
AT3G52930	Dry-6 Up	Polysomal mRNA
AT3G52960	Dry-6 Up	Polysomal mRNA
AT3G53020	Dry-6 Up	Polysomal mRNA
AT3G53110	Dry-6 Up	Polysomal mRNA
AT3G53430	Dry-6 Up	Polysomal mRNA
AT3G53460	Dry-6 Up	Polysomal mRNA
AT3G53740	Dry-6 Up	Polysomal mRNA
AT3G53890	Dry-6 Up	Polysomal mRNA
AT3G53900	Dry-6 Up	Polysomal mRNA
AT3G54470	Dry-6 Up	Polysomal mRNA
AT3G55010	Dry-6 Up	Polysomal mRNA
AT3G55280	Dry-6 Up	Polysomal mRNA
AT3G55440	Dry-6 Up	Polysomal mRNA
AT3G56070	Dry-6 Up	Polysomal mRNA
AT3G56150	Dry-6 Up	Polysomal mRNA
AT3G56340	Dry-6 Up	Polysomal mRNA
AT3G56490	Dry-6 Up	Polysomal mRNA
AT3G57290	Dry-6 Up	Polysomal mRNA
AT3G57560	Dry-6 Up	Polysomal mRNA
AT3G60245	Dry-6 Up	Polysomal mRNA
AT3G60750	Dry-6 Up	Polysomal mRNA
AT3G60770	Dry-6 Up	Polysomal mRNA
AT3G60820	Dry-6 Up	Polysomal mRNA
AT3G61440	Dry-6 Up	Polysomal mRNA
AT3G62250	Dry-6 Up	Polysomal mRNA
AT3G62530	Dry-6 Up	Polysomal mRNA
AT3G62870	Dry-6 Up	Polysomal mRNA
AT4G00620	Dry-6 Up	Polysomal mRNA
AT4G00810	Dry-6 Up	Polysomal mRNA
AT4G01850	Dry-6 Up	Polysomal mRNA
AT4G01900	Dry-6 Up	Polysomal mRNA
AT4G02360	Dry-6 Up	Polysomal mRNA
AT4G02450	Dry-6 Up	Polysomal mRNA
AT4G02580	Dry-6 Up	Polysomal mRNA
AT4G02620	Dry-6 Up	Polysomal mRNA
AT4G02770	Dry-6 Up	Polysomal mRNA
AT4G04640	Dry-6 Up	Polysomal mRNA
AT4G05390	Dry-6 Up	Polysomal mRNA
AT4G05450	Dry-6 Up	Polysomal mRNA
AT4G08390	Dry-6 Up	Polysomal mRNA
AT4G09000	Dry-6 Up	Polysomal mRNA
AT4G09040	Dry-6 Up	Polysomal mRNA
AT4G09320	Dry-6 Up	Polysomal mRNA
AT4G09650	Dry-6 Up	Polysomal mRNA
AT4G10450	Dry-6 Up	Polysomal mRNA
AT4G10480	Dry-6 Up	Polysomal mRNA
AT4G11010	Dry-6 Up	Polysomal mRNA
AT4G11150	Dry-6 Up	Polysomal mRNA
AT4G12910	Dry-6 Up	Polysomal mRNA
AT4G13850	Dry-6 Up	Polysomal mRNA
AT4G13930	Dry-6 Up	Polysomal mRNA
AT4G13940	Dry-6 Up	Polysomal mRNA
AT4G14430	Dry-6 Up	Polysomal mRNA
AT4G14800	Dry-6 Up	Polysomal mRNA
AT4G14960	Dry-6 Up	Polysomal mRNA
AT4G15000	Dry-6 Up	Polysomal mRNA
AT4G16143	Dry-6 Up	Polysomal mRNA
AT4G16210	Dry-6 Up	Polysomal mRNA
AT4G17390	Dry-6 Up	Polysomal mRNA
AT4G17520	Dry-6 Up	Polysomal mRNA
AT4G17870	Dry-6 Up	Polysomal mRNA
AT4G18040	Dry-6 Up	Polysomal mRNA
AT4G18100	Dry-6 Up	Polysomal mRNA
AT4G19006	Dry-6 Up	Polysomal mRNA
AT4G20260	Dry-6 Up	Polysomal mRNA
AT4G20980	Dry-6 Up	Polysomal mRNA
AT4G24620	Dry-6 Up	Polysomal mRNA
AT4G24820	Dry-6 Up	Polysomal mRNA
AT4G24830	Dry-6 Up	Polysomal mRNA
AT4G25340	Dry-6 Up	Polysomal mRNA
AT4G25370	Dry-6 Up	Polysomal mRNA
AT4G25630	Dry-6 Up	Polysomal mRNA
AT4G26110	Dry-6 Up	Polysomal mRNA
AT4G26230	Dry-6 Up	Polysomal mRNA
AT4G26840	Dry-6 Up	Polysomal mRNA
AT4G27320	Dry-6 Up	Polysomal mRNA
AT4G28440	Dry-6 Up	Polysomal mRNA
AT4G29350	Dry-6 Up	Polysomal mRNA
AT4G29410	Dry-6 Up	Polysomal mRNA
AT4G29830	Dry-6 Up	Polysomal mRNA
AT4G30160	Dry-6 Up	Polysomal mRNA
AT4G31700	Dry-6 Up	Polysomal mRNA
AT4G32720	Dry-6 Up	Polysomal mRNA
AT4G34050	Dry-6 Up	Polysomal mRNA
AT4G34200	Dry-6 Up	Polysomal mRNA
AT4G34555	Dry-6 Up	Polysomal mRNA
AT4G34670	Dry-6 Up	Polysomal mRNA
AT4G35000	Dry-6 Up	Polysomal mRNA
AT4G35260	Dry-6 Up	Polysomal mRNA
AT4G36130	Dry-6 Up	Polysomal mRNA
AT4G36760	Dry-6 Up	Polysomal mRNA
AT4G36880	Dry-6 Up	Polysomal mRNA
AT4G37550	Dry-6 Up	Polysomal mRNA
AT4G37870	Dry-6 Up	Polysomal mRNA
AT4G37910	Dry-6 Up	Polysomal mRNA
AT4G38710	Dry-6 Up	Polysomal mRNA
AT4G38970	Dry-6 Up	Polysomal mRNA
AT4G39090	Dry-6 Up	Polysomal mRNA
AT4G39150	Dry-6 Up	Polysomal mRNA
AT5G01650	Dry-6 Up	Polysomal mRNA
AT5G02500	Dry-6 Up	Polysomal mRNA
AT5G02790	Dry-6 Up	Polysomal mRNA
AT5G02870	Dry-6 Up	Polysomal mRNA
AT5G02960	Dry-6 Up	Polysomal mRNA
AT5G03300	Dry-6 Up	Polysomal mRNA
AT5G03630	Dry-6 Up	Polysomal mRNA
AT5G04740	Dry-6 Up	Polysomal mRNA
AT5G05290	Dry-6 Up	Polysomal mRNA
AT5G05780	Dry-6 Up	Polysomal mRNA
AT5G06060	Dry-6 Up	Polysomal mRNA
AT5G07440	Dry-6 Up	Polysomal mRNA
AT5G07460	Dry-6 Up	Polysomal mRNA
AT5G08260	Dry-6 Up	Polysomal mRNA
AT5G08300	Dry-6 Up	Polysomal mRNA
AT5G08570	Dry-6 Up	Polysomal mRNA
AT5G09510	Dry-6 Up	Polysomal mRNA
AT5G09620	Dry-6 Up	Polysomal mRNA
AT5G09650	Dry-6 Up	Polysomal mRNA
AT5G10160	Dry-6 Up	Polysomal mRNA
AT5G10360	Dry-6 Up	Polysomal mRNA
AT5G10920	Dry-6 Up	Polysomal mRNA
AT5G11520	Dry-6 Up	Polysomal mRNA
AT5G12110	Dry-6 Up	Polysomal mRNA
AT5G13120	Dry-6 Up	Polysomal mRNA
AT5G13370	Dry-6 Up	Polysomal mRNA
AT5G13510	Dry-6 Up	Polysomal mRNA
AT5G13850	Dry-6 Up	Polysomal mRNA
AT5G14320	Dry-6 Up	Polysomal mRNA
AT5G14450	Dry-6 Up	Polysomal mRNA
AT5G14800	Dry-6 Up	Polysomal mRNA
AT5G14910	Dry-6 Up	Polysomal mRNA
AT5G15200	Dry-6 Up	Polysomal mRNA
AT5G16130	Dry-6 Up	Polysomal mRNA
AT5G16390	Dry-6 Up	Polysomal mRNA
AT5G17920	Dry-6 Up	Polysomal mRNA
AT5G19440	Dry-6 Up	Polysomal mRNA
AT5G19510	Dry-6 Up	Polysomal mRNA
AT5G19550	Dry-6 Up	Polysomal mRNA
AT5G19760	Dry-6 Up	Polysomal mRNA
AT5G19770	Dry-6 Up	Polysomal mRNA
AT5G19820	Dry-6 Up	Polysomal mRNA
AT5G20010	Dry-6 Up	Polysomal mRNA
AT5G20160	Dry-6 Up	Polysomal mRNA
AT5G20250	Dry-6 Up	Polysomal mRNA
AT5G20290	Dry-6 Up	Polysomal mRNA
AT5G20400	Dry-6 Up	Polysomal mRNA
AT5G20720	Dry-6 Up	Polysomal mRNA
AT5G20920	Dry-6 Up	Polysomal mRNA
AT5G20950	Dry-6 Up	Polysomal mRNA
AT5G22650	Dry-6 Up	Polysomal mRNA
AT5G23740	Dry-6 Up	Polysomal mRNA
AT5G23900	Dry-6 Up	Polysomal mRNA
AT5G25460	Dry-6 Up	Polysomal mRNA
AT5G26667	Dry-6 Up	Polysomal mRNA
AT5G26710	Dry-6 Up	Polysomal mRNA
AT5G27770	Dry-6 Up	Polysomal mRNA
AT5G27850	Dry-6 Up	Polysomal mRNA
AT5G28060	Dry-6 Up	Polysomal mRNA
AT5G28500	Dry-6 Up	Polysomal mRNA
AT5G28840	Dry-6 Up	Polysomal mRNA
AT5G35590	Dry-6 Up	Polysomal mRNA
AT5G35620	Dry-6 Up	Polysomal mRNA
AT5G37475	Dry-6 Up	Polysomal mRNA
AT5G38480	Dry-6 Up	Polysomal mRNA
AT5G39570	Dry-6 Up	Polysomal mRNA
AT5G39580	Dry-6 Up	Polysomal mRNA
AT5G41520	Dry-6 Up	Polysomal mRNA
AT5G41670	Dry-6 Up	Polysomal mRNA
AT5G41970	Dry-6 Up	Polysomal mRNA
AT5G43330	Dry-6 Up	Polysomal mRNA
AT5G43830	Dry-6 Up	Polysomal mRNA
AT5G43960	Dry-6 Up	Polysomal mRNA
AT5G44340	Dry-6 Up	Polysomal mRNA
AT5G46290	Dry-6 Up	Polysomal mRNA
AT5G46430	Dry-6 Up	Polysomal mRNA
AT5G47030	Dry-6 Up	Polysomal mRNA
AT5G47190	Dry-6 Up	Polysomal mRNA
AT5G47210	Dry-6 Up	Polysomal mRNA
AT5G47700	Dry-6 Up	Polysomal mRNA
AT5G47930	Dry-6 Up	Polysomal mRNA
AT5G50370	Dry-6 Up	Polysomal mRNA
AT5G50850	Dry-6 Up	Polysomal mRNA
AT5G51110	Dry-6 Up	Polysomal mRNA
AT5G51120	Dry-6 Up	Polysomal mRNA
AT5G52650	Dry-6 Up	Polysomal mRNA
AT5G52840	Dry-6 Up	Polysomal mRNA
AT5G53400	Dry-6 Up	Polysomal mRNA
AT5G54160	Dry-6 Up	Polysomal mRNA
AT5G54430	Dry-6 Up	Polysomal mRNA
AT5G54500	Dry-6 Up	Polysomal mRNA
AT5G54600	Dry-6 Up	Polysomal mRNA
AT5G54900	Dry-6 Up	Polysomal mRNA
AT5G56260	Dry-6 Up	Polysomal mRNA
AT5G57020	Dry-6 Up	Polysomal mRNA
AT5G57290	Dry-6 Up	Polysomal mRNA
AT5G57870	Dry-6 Up	Polysomal mRNA
AT5G58250	Dry-6 Up	Polysomal mRNA
AT5G58590	Dry-6 Up	Polysomal mRNA
AT5G59290	Dry-6 Up	Polysomal mRNA
AT5G59880	Dry-6 Up	Polysomal mRNA
AT5G60980	Dry-6 Up	Polysomal mRNA
AT5G61170	Dry-6 Up	Polysomal mRNA
AT5G61780	Dry-6 Up	Polysomal mRNA
AT5G62350	Dry-6 Up	Polysomal mRNA
AT5G63310	Dry-6 Up	Polysomal mRNA
AT5G63400	Dry-6 Up	Polysomal mRNA
AT5G63810	Dry-6 Up	Polysomal mRNA
AT5G63980	Dry-6 Up	Polysomal mRNA
AT5G65020	Dry-6 Up	Polysomal mRNA
AT5G65110	Dry-6 Up	Polysomal mRNA
AT5G66090	Dry-6 Up	Polysomal mRNA
AT5G66140	Dry-6 Up	Polysomal mRNA
AT5G66190	Dry-6 Up	Polysomal mRNA
AT5G66570	Dry-6 Up	Polysomal mRNA
AT5G67240	Dry-6 Up	Polysomal mRNA
AT5G67590	Dry-6 Up	Polysomal mRNA
AT1G03890	Dry-6 Down	Polysomal mRNA
AT1G06130	Dry-6 Down	Polysomal mRNA
AT1G07040	Dry-6 Down	Polysomal mRNA
AT1G09500	Dry-6 Down	Polysomal mRNA
AT1G11910	Dry-6 Down	Polysomal mRNA
AT1G15330	Dry-6 Down	Polysomal mRNA
AT1G15690	Dry-6 Down	Polysomal mRNA
AT1G16770	Dry-6 Down	Polysomal mRNA
AT1G17220	Dry-6 Down	Polysomal mRNA
AT1G18500	Dry-6 Down	Polysomal mRNA
AT1G20630	Dry-6 Down	Polysomal mRNA
AT1G21670	Dry-6 Down	Polysomal mRNA
AT1G29680	Dry-6 Down	Polysomal mRNA
AT1G41830	Dry-6 Down	Polysomal mRNA
AT1G47980	Dry-6 Down	Polysomal mRNA
AT1G48470	Dry-6 Down	Polysomal mRNA
AT1G54860	Dry-6 Down	Polysomal mRNA
AT1G55020	Dry-6 Down	Polysomal mRNA
AT1G62290	Dry-6 Down	Polysomal mRNA
AT1G62710	Dry-6 Down	Polysomal mRNA
AT1G69800	Dry-6 Down	Polysomal mRNA
AT1G70580	Dry-6 Down	Polysomal mRNA
AT1G71695	Dry-6 Down	Polysomal mRNA
AT1G72970	Dry-6 Down	Polysomal mRNA
AT1G79440	Dry-6 Down	Polysomal mRNA
AT2G05920	Dry-6 Down	Polysomal mRNA
AT2G14170	Dry-6 Down	Polysomal mRNA
AT2G18540	Dry-6 Down	Polysomal mRNA
AT2G19900	Dry-6 Down	Polysomal mRNA
AT2G22240	Dry-6 Down	Polysomal mRNA
AT2G27680	Dry-6 Down	Polysomal mRNA
AT2G28490	Dry-6 Down	Polysomal mRNA
AT2G28790	Dry-6 Down	Polysomal mRNA
AT2G29300	Dry-6 Down	Polysomal mRNA
AT2G30110	Dry-6 Down	Polysomal mRNA
AT2G37970	Dry-6 Down	Polysomal mRNA
AT2G44350	Dry-6 Down	Polysomal mRNA
AT2G45290	Dry-6 Down	Polysomal mRNA
AT3G03320	Dry-6 Down	Polysomal mRNA
AT3G10350	Dry-6 Down	Polysomal mRNA
AT3G10410	Dry-6 Down	Polysomal mRNA
AT3G14067	Dry-6 Down	Polysomal mRNA
AT3G16110	Dry-6 Down	Polysomal mRNA
AT3G17810	Dry-6 Down	Polysomal mRNA
AT3G18080	Dry-6 Down	Polysomal mRNA
AT3G19170	Dry-6 Down	Polysomal mRNA
AT3G21370	Dry-6 Down	Polysomal mRNA
AT3G21380	Dry-6 Down	Polysomal mRNA
AT3G26380	Dry-6 Down	Polysomal mRNA
AT3G26720	Dry-6 Down	Polysomal mRNA
AT3G45780	Dry-6 Down	Polysomal mRNA
AT3G50970	Dry-6 Down	Polysomal mRNA
AT3G52850	Dry-6 Down	Polysomal mRNA
AT3G53040	Dry-6 Down	Polysomal mRNA
AT3G54050	Dry-6 Down	Polysomal mRNA
AT3G55260	Dry-6 Down	Polysomal mRNA
AT3G55430	Dry-6 Down	Polysomal mRNA
AT3G56310	Dry-6 Down	Polysomal mRNA
AT3G57020	Dry-6 Down	Polysomal mRNA
AT3G60340	Dry-6 Down	Polysomal mRNA
AT4G02280	Dry-6 Down	Polysomal mRNA
AT4G03200	Dry-6 Down	Polysomal mRNA
AT4G10020	Dry-6 Down	Polysomal mRNA
AT4G12130	Dry-6 Down	Polysomal mRNA
AT4G12290	Dry-6 Down	Polysomal mRNA
AT4G16155	Dry-6 Down	Polysomal mRNA
AT4G19410	Dry-6 Down	Polysomal mRNA
AT4G25580	Dry-6 Down	Polysomal mRNA
AT4G31840	Dry-6 Down	Polysomal mRNA
AT4G32770	Dry-6 Down	Polysomal mRNA
AT4G34450	Dry-6 Down	Polysomal mRNA
AT4G36195	Dry-6 Down	Polysomal mRNA
AT4G36360	Dry-6 Down	Polysomal mRNA
AT4G36700	Dry-6 Down	Polysomal mRNA
AT4G38220	Dry-6 Down	Polysomal mRNA
AT4G38350	Dry-6 Down	Polysomal mRNA
AT5G01670	Dry-6 Down	Polysomal mRNA
AT5G04885	Dry-6 Down	Polysomal mRNA
AT5G07030	Dry-6 Down	Polysomal mRNA
AT5G07190	Dry-6 Down	Polysomal mRNA
AT5G07830	Dry-6 Down	Polysomal mRNA
AT5G09640	Dry-6 Down	Polysomal mRNA
AT5G10730	Dry-6 Down	Polysomal mRNA
AT5G11200	Dry-6 Down	Polysomal mRNA
AT5G13690	Dry-6 Down	Polysomal mRNA
AT5G13980	Dry-6 Down	Polysomal mRNA
AT5G22470	Dry-6 Down	Polysomal mRNA
AT5G26000	Dry-6 Down	Polysomal mRNA
AT5G27410	Dry-6 Down	Polysomal mRNA
AT5G43600	Dry-6 Down	Polysomal mRNA
AT5G44310	Dry-6 Down	Polysomal mRNA
AT5G45830	Dry-6 Down	Polysomal mRNA
AT5G50920	Dry-6 Down	Polysomal mRNA
AT5G51820	Dry-6 Down	Polysomal mRNA
AT5G52300	Dry-6 Down	Polysomal mRNA
AT5G54080	Dry-6 Down	Polysomal mRNA
AT5G54960	Dry-6 Down	Polysomal mRNA
AT5G57550	Dry-6 Down	Polysomal mRNA
AT5G58330	Dry-6 Down	Polysomal mRNA
AT5G60640	Dry-6 Down	Polysomal mRNA
AT5G64260	Dry-6 Down	Polysomal mRNA
AT5G65750	Dry-6 Down	Polysomal mRNA
AT5G66760	Dry-6 Down	Polysomal mRNA
AT1G01320	6-26 Up	Polysomal mRNA
AT1G02500	6-26 Up	Polysomal mRNA
AT1G02640	6-26 Up	Polysomal mRNA
AT1G03630	6-26 Up	Polysomal mRNA
AT1G03870	6-26 Up	Polysomal mRNA
AT1G04420	6-26 Up	Polysomal mRNA
AT1G04820	6-26 Up	Polysomal mRNA
AT1G04980	6-26 Up	Polysomal mRNA
AT1G05190	6-26 Up	Polysomal mRNA
AT1G06680	6-26 Up	Polysomal mRNA
AT1G07320	6-26 Up	Polysomal mRNA
AT1G07890	6-26 Up	Polysomal mRNA
AT1G08520	6-26 Up	Polysomal mRNA
AT1G09200	6-26 Up	Polysomal mRNA
AT1G09210	6-26 Up	Polysomal mRNA
AT1G09310	6-26 Up	Polysomal mRNA
AT1G09750	6-26 Up	Polysomal mRNA
AT1G09780	6-26 Up	Polysomal mRNA
AT1G10670	6-26 Up	Polysomal mRNA
AT1G10960	6-26 Up	Polysomal mRNA
AT1G11580	6-26 Up	Polysomal mRNA
AT1G12000	6-26 Up	Polysomal mRNA
AT1G12230	6-26 Up	Polysomal mRNA
AT1G12900	6-26 Up	Polysomal mRNA
AT1G13270	6-26 Up	Polysomal mRNA
AT1G13280	6-26 Up	Polysomal mRNA
AT1G14810	6-26 Up	Polysomal mRNA
AT1G16350	6-26 Up	Polysomal mRNA
AT1G16880	6-26 Up	Polysomal mRNA
AT1G17650	6-26 Up	Polysomal mRNA
AT1G20340	6-26 Up	Polysomal mRNA
AT1G20440	6-26 Up	Polysomal mRNA
AT1G20950	6-26 Up	Polysomal mRNA
AT1G21750	6-26 Up	Polysomal mRNA
AT1G23190	6-26 Up	Polysomal mRNA
AT1G24360	6-26 Up	Polysomal mRNA
AT1G27400	6-26 Up	Polysomal mRNA
AT1G27450	6-26 Up	Polysomal mRNA
AT1G28290	6-26 Up	Polysomal mRNA
AT1G30120	6-26 Up	Polysomal mRNA
AT1G30630	6-26 Up	Polysomal mRNA
AT1G30690	6-26 Up	Polysomal mRNA
AT1G31180	6-26 Up	Polysomal mRNA
AT1G31812	6-26 Up	Polysomal mRNA
AT1G32200	6-26 Up	Polysomal mRNA
AT1G32470	6-26 Up	Polysomal mRNA
AT1G32990	6-26 Up	Polysomal mRNA
AT1G33040	6-26 Up	Polysomal mRNA
AT1G34430	6-26 Up	Polysomal mRNA
AT1G35680	6-26 Up	Polysomal mRNA
AT1G41830	6-26 Up	Polysomal mRNA
AT1G41880	6-26 Up	Polysomal mRNA
AT1G42970	6-26 Up	Polysomal mRNA
AT1G43780	6-26 Up	Polysomal mRNA
AT1G47128	6-26 Up	Polysomal mRNA
AT1G47260	6-26 Up	Polysomal mRNA
AT1G48350	6-26 Up	Polysomal mRNA
AT1G48520	6-26 Up	Polysomal mRNA
AT1G48610	6-26 Up	Polysomal mRNA
AT1G48630	6-26 Up	Polysomal mRNA
AT1G52670	6-26 Up	Polysomal mRNA
AT1G53070	6-26 Up	Polysomal mRNA
AT1G53240	6-26 Up	Polysomal mRNA
AT1G54000	6-26 Up	Polysomal mRNA
AT1G54010	6-26 Up	Polysomal mRNA
AT1G54410	6-26 Up	Polysomal mRNA
AT1G54580	6-26 Up	Polysomal mRNA
AT1G55490	6-26 Up	Polysomal mRNA
AT1G56330	6-26 Up	Polysomal mRNA
AT1G56340	6-26 Up	Polysomal mRNA
AT1G57660	6-26 Up	Polysomal mRNA
AT1G62640	6-26 Up	Polysomal mRNA
AT1G62750	6-26 Up	Polysomal mRNA
AT1G62780	6-26 Up	Polysomal mRNA
AT1G64510	6-26 Up	Polysomal mRNA
AT1G64970	6-26 Up	Polysomal mRNA
AT1G65930	6-26 Up	Polysomal mRNA
AT1G66270	6-26 Up	Polysomal mRNA
AT1G66430	6-26 Up	Polysomal mRNA
AT1G67090	6-26 Up	Polysomal mRNA
AT1G68560	6-26 Up	Polysomal mRNA
AT1G68590	6-26 Up	Polysomal mRNA
AT1G69620	6-26 Up	Polysomal mRNA
AT1G69740	6-26 Up	Polysomal mRNA
AT1G70410	6-26 Up	Polysomal mRNA
AT1G70830	6-26 Up	Polysomal mRNA
AT1G72970	6-26 Up	Polysomal mRNA
AT1G74030	6-26 Up	Polysomal mRNA
AT1G74100	6-26 Up	Polysomal mRNA
AT1G74920	6-26 Up	Polysomal mRNA
AT1G74960	6-26 Up	Polysomal mRNA
AT1G74970	6-26 Up	Polysomal mRNA
AT1G76160	6-26 Up	Polysomal mRNA
AT1G76450	6-26 Up	Polysomal mRNA
AT1G78060	6-26 Up	Polysomal mRNA
AT1G78300	6-26 Up	Polysomal mRNA
AT1G78370	6-26 Up	Polysomal mRNA
AT1G78630	6-26 Up	Polysomal mRNA
AT1G78850	6-26 Up	Polysomal mRNA
AT1G79500	6-26 Up	Polysomal mRNA
AT1G79530	6-26 Up	Polysomal mRNA
AT2G04400	6-26 Up	Polysomal mRNA
AT2G04780	6-26 Up	Polysomal mRNA
AT2G05220	6-26 Up	Polysomal mRNA
AT2G05990	6-26 Up	Polysomal mRNA
AT2G17560	6-26 Up	Polysomal mRNA
AT2G19590	6-26 Up	Polysomal mRNA
AT2G19940	6-26 Up	Polysomal mRNA
AT2G20360	6-26 Up	Polysomal mRNA
AT2G20610	6-26 Up	Polysomal mRNA
AT2G21170	6-26 Up	Polysomal mRNA
AT2G21250	6-26 Up	Polysomal mRNA
AT2G21870	6-26 Up	Polysomal mRNA
AT2G22170	6-26 Up	Polysomal mRNA
AT2G22230	6-26 Up	Polysomal mRNA
AT2G24020	6-26 Up	Polysomal mRNA
AT2G24270	6-26 Up	Polysomal mRNA
AT2G25840	6-26 Up	Polysomal mRNA
AT2G25980	6-26 Up	Polysomal mRNA
AT2G26080	6-26 Up	Polysomal mRNA
AT2G27040	6-26 Up	Polysomal mRNA
AT2G27710	6-26 Up	Polysomal mRNA
AT2G28470	6-26 Up	Polysomal mRNA
AT2G30050	6-26 Up	Polysomal mRNA
AT2G30200	6-26 Up	Polysomal mRNA
AT2G30860	6-26 Up	Polysomal mRNA
AT2G30870	6-26 Up	Polysomal mRNA
AT2G30970	6-26 Up	Polysomal mRNA
AT2G32060	6-26 Up	Polysomal mRNA
AT2G32520	6-26 Up	Polysomal mRNA
AT2G33040	6-26 Up	Polysomal mRNA
AT2G33210	6-26 Up	Polysomal mRNA
AT2G33800	6-26 Up	Polysomal mRNA
AT2G35370	6-26 Up	Polysomal mRNA
AT2G36880	6-26 Up	Polysomal mRNA
AT2G37270	6-26 Up	Polysomal mRNA
AT2G37660	6-26 Up	Polysomal mRNA
AT2G38540	6-26 Up	Polysomal mRNA
AT2G38700	6-26 Up	Polysomal mRNA
AT2G39080	6-26 Up	Polysomal mRNA
AT2G39310	6-26 Up	Polysomal mRNA
AT2G39730	6-26 Up	Polysomal mRNA
AT2G40490	6-26 Up	Polysomal mRNA
AT2G41680	6-26 Up	Polysomal mRNA
AT2G42740	6-26 Up	Polysomal mRNA
AT2G43030	6-26 Up	Polysomal mRNA
AT2G43460	6-26 Up	Polysomal mRNA
AT2G43560	6-26 Up	Polysomal mRNA
AT2G43910	6-26 Up	Polysomal mRNA
AT2G44040	6-26 Up	Polysomal mRNA
AT2G44050	6-26 Up	Polysomal mRNA
AT2G44060	6-26 Up	Polysomal mRNA
AT2G44650	6-26 Up	Polysomal mRNA
AT2G44920	6-26 Up	Polysomal mRNA
AT2G45790	6-26 Up	Polysomal mRNA
AT2G47450	6-26 Up	Polysomal mRNA
AT2G47470	6-26 Up	Polysomal mRNA
AT2G47510	6-26 Up	Polysomal mRNA
AT2G47610	6-26 Up	Polysomal mRNA
AT2G47940	6-26 Up	Polysomal mRNA
AT3G01480	6-26 Up	Polysomal mRNA
AT3G02110	6-26 Up	Polysomal mRNA
AT3G02230	6-26 Up	Polysomal mRNA
AT3G02730	6-26 Up	Polysomal mRNA
AT3G02870	6-26 Up	Polysomal mRNA
AT3G03780	6-26 Up	Polysomal mRNA
AT3G04120	6-26 Up	Polysomal mRNA
AT3G04840	6-26 Up	Polysomal mRNA
AT3G07110	6-26 Up	Polysomal mRNA
AT3G07390	6-26 Up	Polysomal mRNA
AT3G08740	6-26 Up	Polysomal mRNA
AT3G09260	6-26 Up	Polysomal mRNA
AT3G09500	6-26 Up	Polysomal mRNA
AT3G09630	6-26 Up	Polysomal mRNA
AT3G09820	6-26 Up	Polysomal mRNA
AT3G11510	6-26 Up	Polysomal mRNA
AT3G11630	6-26 Up	Polysomal mRNA
AT3G12145	6-26 Up	Polysomal mRNA
AT3G12290	6-26 Up	Polysomal mRNA
AT3G12780	6-26 Up	Polysomal mRNA
AT3G13470	6-26 Up	Polysomal mRNA
AT3G14220	6-26 Up	Polysomal mRNA
AT3G14290	6-26 Up	Polysomal mRNA
AT3G14310	6-26 Up	Polysomal mRNA
AT3G14420	6-26 Up	Polysomal mRNA
AT3G14930	6-26 Up	Polysomal mRNA
AT3G15020	6-26 Up	Polysomal mRNA
AT3G15190	6-26 Up	Polysomal mRNA
AT3G15640	6-26 Up	Polysomal mRNA
AT3G15950	6-26 Up	Polysomal mRNA
AT3G16400	6-26 Up	Polysomal mRNA
AT3G16420	6-26 Up	Polysomal mRNA
AT3G16430	6-26 Up	Polysomal mRNA
AT3G16450	6-26 Up	Polysomal mRNA
AT3G16460	6-26 Up	Polysomal mRNA
AT3G16950	6-26 Up	Polysomal mRNA
AT3G18080	6-26 Up	Polysomal mRNA
AT3G23600	6-26 Up	Polysomal mRNA
AT3G23940	6-26 Up	Polysomal mRNA
AT3G25530	6-26 Up	Polysomal mRNA
AT3G25860	6-26 Up	Polysomal mRNA
AT3G25920	6-26 Up	Polysomal mRNA
AT3G26650	6-26 Up	Polysomal mRNA
AT3G27160	6-26 Up	Polysomal mRNA
AT3G29360	6-26 Up	Polysomal mRNA
AT3G44590	6-26 Up	Polysomal mRNA
AT3G44890	6-26 Up	Polysomal mRNA
AT3G44990	6-26 Up	Polysomal mRNA
AT3G45310	6-26 Up	Polysomal mRNA
AT3G48700	6-26 Up	Polysomal mRNA
AT3G48730	6-26 Up	Polysomal mRNA
AT3G50820	6-26 Up	Polysomal mRNA
AT3G51160	6-26 Up	Polysomal mRNA
AT3G52150	6-26 Up	Polysomal mRNA
AT3G52380	6-26 Up	Polysomal mRNA
AT3G52750	6-26 Up	Polysomal mRNA
AT3G52880	6-26 Up	Polysomal mRNA
AT3G53580	6-26 Up	Polysomal mRNA
AT3G53890	6-26 Up	Polysomal mRNA
AT3G53900	6-26 Up	Polysomal mRNA
AT3G54050	6-26 Up	Polysomal mRNA
AT3G54470	6-26 Up	Polysomal mRNA
AT3G54640	6-26 Up	Polysomal mRNA
AT3G55800	6-26 Up	Polysomal mRNA
AT3G56340	6-26 Up	Polysomal mRNA
AT3G56490	6-26 Up	Polysomal mRNA
AT3G56910	6-26 Up	Polysomal mRNA
AT3G57560	6-26 Up	Polysomal mRNA
AT3G57610	6-26 Up	Polysomal mRNA
AT3G59760	6-26 Up	Polysomal mRNA
AT3G59970	6-26 Up	Polysomal mRNA
AT3G60245	6-26 Up	Polysomal mRNA
AT3G61440	6-26 Up	Polysomal mRNA
AT3G62030	6-26 Up	Polysomal mRNA
AT3G62870	6-26 Up	Polysomal mRNA
AT3G63190	6-26 Up	Polysomal mRNA
AT4G00810	6-26 Up	Polysomal mRNA
AT4G01310	6-26 Up	Polysomal mRNA
AT4G01610	6-26 Up	Polysomal mRNA
AT4G01700	6-26 Up	Polysomal mRNA
AT4G01900	6-26 Up	Polysomal mRNA
AT4G02580	6-26 Up	Polysomal mRNA
AT4G02930	6-26 Up	Polysomal mRNA
AT4G04640	6-26 Up	Polysomal mRNA
AT4G09040	6-26 Up	Polysomal mRNA
AT4G09650	6-26 Up	Polysomal mRNA
AT4G11010	6-26 Up	Polysomal mRNA
AT4G11120	6-26 Up	Polysomal mRNA
AT4G12420	6-26 Up	Polysomal mRNA
AT4G12730	6-26 Up	Polysomal mRNA
AT4G12910	6-26 Up	Polysomal mRNA
AT4G13930	6-26 Up	Polysomal mRNA
AT4G14960	6-26 Up	Polysomal mRNA
AT4G16155	6-26 Up	Polysomal mRNA
AT4G18100	6-26 Up	Polysomal mRNA
AT4G18480	6-26 Up	Polysomal mRNA
AT4G18970	6-26 Up	Polysomal mRNA
AT4G21280	6-26 Up	Polysomal mRNA
AT4G23650	6-26 Up	Polysomal mRNA
AT4G24190	6-26 Up	Polysomal mRNA
AT4G24830	6-26 Up	Polysomal mRNA
AT4G25080	6-26 Up	Polysomal mRNA
AT4G25100	6-26 Up	Polysomal mRNA
AT4G25370	6-26 Up	Polysomal mRNA
AT4G26300	6-26 Up	Polysomal mRNA
AT4G26900	6-26 Up	Polysomal mRNA
AT4G27440	6-26 Up	Polysomal mRNA
AT4G28750	6-26 Up	Polysomal mRNA
AT4G29060	6-26 Up	Polysomal mRNA
AT4G29270	6-26 Up	Polysomal mRNA
AT4G30290	6-26 Up	Polysomal mRNA
AT4G30810	6-26 Up	Polysomal mRNA
AT4G30880	6-26 Up	Polysomal mRNA
AT4G31500	6-26 Up	Polysomal mRNA
AT4G31990	6-26 Up	Polysomal mRNA
AT4G33010	6-26 Up	Polysomal mRNA
AT4G33680	6-26 Up	Polysomal mRNA
AT4G34110	6-26 Up	Polysomal mRNA
AT4G34200	6-26 Up	Polysomal mRNA
AT4G34260	6-26 Up	Polysomal mRNA
AT4G34490	6-26 Up	Polysomal mRNA
AT4G36880	6-26 Up	Polysomal mRNA
AT4G37930	6-26 Up	Polysomal mRNA
AT4G38510	6-26 Up	Polysomal mRNA
AT4G38800	6-26 Up	Polysomal mRNA
AT4G38970	6-26 Up	Polysomal mRNA
AT4G39150	6-26 Up	Polysomal mRNA
AT4G39200	6-26 Up	Polysomal mRNA
AT4G39330	6-26 Up	Polysomal mRNA
AT5G01600	6-26 Up	Polysomal mRNA
AT5G02790	6-26 Up	Polysomal mRNA
AT5G03300	6-26 Up	Polysomal mRNA
AT5G03630	6-26 Up	Polysomal mRNA
AT5G03940	6-26 Up	Polysomal mRNA
AT5G04740	6-26 Up	Polysomal mRNA
AT5G05010	6-26 Up	Polysomal mRNA
AT5G05290	6-26 Up	Polysomal mRNA
AT5G06290	6-26 Up	Polysomal mRNA
AT5G07350	6-26 Up	Polysomal mRNA
AT5G07460	6-26 Up	Polysomal mRNA
AT5G08260	6-26 Up	Polysomal mRNA
AT5G08280	6-26 Up	Polysomal mRNA
AT5G08300	6-26 Up	Polysomal mRNA
AT5G08690	6-26 Up	Polysomal mRNA
AT5G09650	6-26 Up	Polysomal mRNA
AT5G09660	6-26 Up	Polysomal mRNA
AT5G10160	6-26 Up	Polysomal mRNA
AT5G10560	6-26 Up	Polysomal mRNA
AT5G10920	6-26 Up	Polysomal mRNA
AT5G11420	6-26 Up	Polysomal mRNA
AT5G11450	6-26 Up	Polysomal mRNA
AT5G11880	6-26 Up	Polysomal mRNA
AT5G12950	6-26 Up	Polysomal mRNA
AT5G13120	6-26 Up	Polysomal mRNA
AT5G13450	6-26 Up	Polysomal mRNA
AT5G13510	6-26 Up	Polysomal mRNA
AT5G13980	6-26 Up	Polysomal mRNA
AT5G14320	6-26 Up	Polysomal mRNA
AT5G14450	6-26 Up	Polysomal mRNA
AT5G15230	6-26 Up	Polysomal mRNA
AT5G15650	6-26 Up	Polysomal mRNA
AT5G16130	6-26 Up	Polysomal mRNA
AT5G16390	6-26 Up	Polysomal mRNA
AT5G16510	6-26 Up	Polysomal mRNA
AT5G17920	6-26 Up	Polysomal mRNA
AT5G19760	6-26 Up	Polysomal mRNA
AT5G20080	6-26 Up	Polysomal mRNA
AT5G20250	6-26 Up	Polysomal mRNA
AT5G20400	6-26 Up	Polysomal mRNA
AT5G20500	6-26 Up	Polysomal mRNA
AT5G20950	6-26 Up	Polysomal mRNA
AT5G23120	6-26 Up	Polysomal mRNA
AT5G23740	6-26 Up	Polysomal mRNA
AT5G23820	6-26 Up	Polysomal mRNA
AT5G25460	6-26 Up	Polysomal mRNA
AT5G26260	6-26 Up	Polysomal mRNA
AT5G26280	6-26 Up	Polysomal mRNA
AT5G26667	6-26 Up	Polysomal mRNA
AT5G26742	6-26 Up	Polysomal mRNA
AT5G27380	6-26 Up	Polysomal mRNA
AT5G27410	6-26 Up	Polysomal mRNA
AT5G27770	6-26 Up	Polysomal mRNA
AT5G28060	6-26 Up	Polysomal mRNA
AT5G28500	6-26 Up	Polysomal mRNA
AT5G28540	6-26 Up	Polysomal mRNA
AT5G30510	6-26 Up	Polysomal mRNA
AT5G34850	6-26 Up	Polysomal mRNA
AT5G34940	6-26 Up	Polysomal mRNA
AT5G35360	6-26 Up	Polysomal mRNA
AT5G36890	6-26 Up	Polysomal mRNA
AT5G38410	6-26 Up	Polysomal mRNA
AT5G38430	6-26 Up	Polysomal mRNA
AT5G38480	6-26 Up	Polysomal mRNA
AT5G39320	6-26 Up	Polysomal mRNA
AT5G39570	6-26 Up	Polysomal mRNA
AT5G39580	6-26 Up	Polysomal mRNA
AT5G41520	6-26 Up	Polysomal mRNA
AT5G43060	6-26 Up	Polysomal mRNA
AT5G43330	6-26 Up	Polysomal mRNA
AT5G43830	6-26 Up	Polysomal mRNA
AT5G44340	6-26 Up	Polysomal mRNA
AT5G44720	6-26 Up	Polysomal mRNA
AT5G45930	6-26 Up	Polysomal mRNA
AT5G46290	6-26 Up	Polysomal mRNA
AT5G47190	6-26 Up	Polysomal mRNA
AT5G47700	6-26 Up	Polysomal mRNA
AT5G47930	6-26 Up	Polysomal mRNA
AT5G48300	6-26 Up	Polysomal mRNA
AT5G48580	6-26 Up	Polysomal mRNA
AT5G49460	6-26 Up	Polysomal mRNA
AT5G50370	6-26 Up	Polysomal mRNA
AT5G51100	6-26 Up	Polysomal mRNA
AT5G51750	6-26 Up	Polysomal mRNA
AT5G51820	6-26 Up	Polysomal mRNA
AT5G52650	6-26 Up	Polysomal mRNA
AT5G54160	6-26 Up	Polysomal mRNA
AT5G54900	6-26 Up	Polysomal mRNA
AT5G55220	6-26 Up	Polysomal mRNA
AT5G55280	6-26 Up	Polysomal mRNA
AT5G55480	6-26 Up	Polysomal mRNA
AT5G55730	6-26 Up	Polysomal mRNA
AT5G57290	6-26 Up	Polysomal mRNA
AT5G59290	6-26 Up	Polysomal mRNA
AT5G61170	6-26 Up	Polysomal mRNA
AT5G61790	6-26 Up	Polysomal mRNA
AT5G62530	6-26 Up	Polysomal mRNA
AT5G62690	6-26 Up	Polysomal mRNA
AT5G63140	6-26 Up	Polysomal mRNA
AT5G63310	6-26 Up	Polysomal mRNA
AT5G63810	6-26 Up	Polysomal mRNA
AT5G63980	6-26 Up	Polysomal mRNA
AT5G64100	6-26 Up	Polysomal mRNA
AT5G64120	6-26 Up	Polysomal mRNA
AT5G64140	6-26 Up	Polysomal mRNA
AT5G64570	6-26 Up	Polysomal mRNA
AT5G65020	6-26 Up	Polysomal mRNA
AT5G66170	6-26 Up	Polysomal mRNA
AT5G66190	6-26 Up	Polysomal mRNA
AT5G66530	6-26 Up	Polysomal mRNA
AT5G66570	6-26 Up	Polysomal mRNA
AT1G01470	6-26 Down	Polysomal mRNA
AT1G02920	6-26 Down	Polysomal mRNA
AT1G03220	6-26 Down	Polysomal mRNA
AT1G03230	6-26 Down	Polysomal mRNA
AT1G03880	6-26 Down	Polysomal mRNA
AT1G03890	6-26 Down	Polysomal mRNA
AT1G05510	6-26 Down	Polysomal mRNA
AT1G07040	6-26 Down	Polysomal mRNA
AT1G07645	6-26 Down	Polysomal mRNA
AT1G14930	6-26 Down	Polysomal mRNA
AT1G14940	6-26 Down	Polysomal mRNA
AT1G14950	6-26 Down	Polysomal mRNA
AT1G16030	6-26 Down	Polysomal mRNA
AT1G16770	6-26 Down	Polysomal mRNA
AT1G17100	6-26 Down	Polysomal mRNA
AT1G17290	6-26 Down	Polysomal mRNA
AT1G18100	6-26 Down	Polysomal mRNA
AT1G20620	6-26 Down	Polysomal mRNA
AT1G20630	6-26 Down	Polysomal mRNA
AT1G24735	6-26 Down	Polysomal mRNA
AT1G29680	6-26 Down	Polysomal mRNA
AT1G47540	6-26 Down	Polysomal mRNA
AT1G47980	6-26 Down	Polysomal mRNA
AT1G52560	6-26 Down	Polysomal mRNA
AT1G53540	6-26 Down	Polysomal mRNA
AT1G54100	6-26 Down	Polysomal mRNA
AT1G54860	6-26 Down	Polysomal mRNA
AT1G55020	6-26 Down	Polysomal mRNA
AT1G59700	6-26 Down	Polysomal mRNA
AT1G60680	6-26 Down	Polysomal mRNA
AT1G60940	6-26 Down	Polysomal mRNA
AT1G62710	6-26 Down	Polysomal mRNA
AT1G70580	6-26 Down	Polysomal mRNA
AT1G70810	6-26 Down	Polysomal mRNA
AT1G71950	6-26 Down	Polysomal mRNA
AT1G72150	6-26 Down	Polysomal mRNA
AT1G72680	6-26 Down	Polysomal mRNA
AT1G74310	6-26 Down	Polysomal mRNA
AT1G75280	6-26 Down	Polysomal mRNA
AT1G77120	6-26 Down	Polysomal mRNA
AT1G78380	6-26 Down	Polysomal mRNA
AT2G02390	6-26 Down	Polysomal mRNA
AT2G02850	6-26 Down	Polysomal mRNA
AT2G02930	6-26 Down	Polysomal mRNA
AT2G18570	6-26 Down	Polysomal mRNA
AT2G20560	6-26 Down	Polysomal mRNA
AT2G22240	6-26 Down	Polysomal mRNA
AT2G24940	6-26 Down	Polysomal mRNA
AT2G26740	6-26 Down	Polysomal mRNA
AT2G28490	6-26 Down	Polysomal mRNA
AT2G32120	6-26 Down	Polysomal mRNA
AT2G33070	6-26 Down	Polysomal mRNA
AT2G33590	6-26 Down	Polysomal mRNA
AT2G34700	6-26 Down	Polysomal mRNA
AT2G36640	6-26 Down	Polysomal mRNA
AT2G37760	6-26 Down	Polysomal mRNA
AT2G37970	6-26 Down	Polysomal mRNA
AT2G43520	6-26 Down	Polysomal mRNA
AT2G45290	6-26 Down	Polysomal mRNA
AT3G01570	6-26 Down	Polysomal mRNA
AT3G05260	6-26 Down	Polysomal mRNA
AT3G09350	6-26 Down	Polysomal mRNA
AT3G11050	6-26 Down	Polysomal mRNA
AT3G11930	6-26 Down	Polysomal mRNA
AT3G12490	6-26 Down	Polysomal mRNA
AT3G12580	6-26 Down	Polysomal mRNA
AT3G12960	6-26 Down	Polysomal mRNA
AT3G14990	6-26 Down	Polysomal mRNA
AT3G15260	6-26 Down	Polysomal mRNA
AT3G16190	6-26 Down	Polysomal mRNA
AT3G16990	6-26 Down	Polysomal mRNA
AT3G21370	6-26 Down	Polysomal mRNA
AT3G22640	6-26 Down	Polysomal mRNA
AT3G44300	6-26 Down	Polysomal mRNA
AT3G46230	6-26 Down	Polysomal mRNA
AT3G48990	6-26 Down	Polysomal mRNA
AT3G50970	6-26 Down	Polysomal mRNA
AT3G51880	6-26 Down	Polysomal mRNA
AT3G53040	6-26 Down	Polysomal mRNA
AT3G56310	6-26 Down	Polysomal mRNA
AT3G56350	6-26 Down	Polysomal mRNA
AT3G57020	6-26 Down	Polysomal mRNA
AT3G58450	6-26 Down	Polysomal mRNA
AT4G02280	6-26 Down	Polysomal mRNA
AT4G03200	6-26 Down	Polysomal mRNA
AT4G10020	6-26 Down	Polysomal mRNA
AT4G11600	6-26 Down	Polysomal mRNA
AT4G11740	6-26 Down	Polysomal mRNA
AT4G12290	6-26 Down	Polysomal mRNA
AT4G13010	6-26 Down	Polysomal mRNA
AT4G17530	6-26 Down	Polysomal mRNA
AT4G20260	6-26 Down	Polysomal mRNA
AT4G21580	6-26 Down	Polysomal mRNA
AT4G22240	6-26 Down	Polysomal mRNA
AT4G24220	6-26 Down	Polysomal mRNA
AT4G25140	6-26 Down	Polysomal mRNA
AT4G25580	6-26 Down	Polysomal mRNA
AT4G26740	6-26 Down	Polysomal mRNA
AT4G27140	6-26 Down	Polysomal mRNA
AT4G27150	6-26 Down	Polysomal mRNA
AT4G27160	6-26 Down	Polysomal mRNA
AT4G27170	6-26 Down	Polysomal mRNA
AT4G36195	6-26 Down	Polysomal mRNA
AT4G36600	6-26 Down	Polysomal mRNA
AT4G36700	6-26 Down	Polysomal mRNA
AT5G01670	6-26 Down	Polysomal mRNA
AT5G07190	6-26 Down	Polysomal mRNA
AT5G07830	6-26 Down	Polysomal mRNA
AT5G09590	6-26 Down	Polysomal mRNA
AT5G09640	6-26 Down	Polysomal mRNA
AT5G11680	6-26 Down	Polysomal mRNA
AT5G12030	6-26 Down	Polysomal mRNA
AT5G12110	6-26 Down	Polysomal mRNA
AT5G13420	6-26 Down	Polysomal mRNA
AT5G14780	6-26 Down	Polysomal mRNA
AT5G16730	6-26 Down	Polysomal mRNA
AT5G17310	6-26 Down	Polysomal mRNA
AT5G17380	6-26 Down	Polysomal mRNA
AT5G18100	6-26 Down	Polysomal mRNA
AT5G19440	6-26 Down	Polysomal mRNA
AT5G20960	6-26 Down	Polysomal mRNA
AT5G39720	6-26 Down	Polysomal mRNA
AT5G40420	6-26 Down	Polysomal mRNA
AT5G40760	6-26 Down	Polysomal mRNA
AT5G45830	6-26 Down	Polysomal mRNA
AT5G46230	6-26 Down	Polysomal mRNA
AT5G47810	6-26 Down	Polysomal mRNA
AT5G52640	6-26 Down	Polysomal mRNA
AT5G54080	6-26 Down	Polysomal mRNA
AT5G54640	6-26 Down	Polysomal mRNA
AT5G54960	6-26 Down	Polysomal mRNA
AT5G55240	6-26 Down	Polysomal mRNA
AT5G57550	6-26 Down	Polysomal mRNA
AT5G58070	6-26 Down	Polysomal mRNA
AT5G61510	6-26 Down	Polysomal mRNA
AT5G63030	6-26 Down	Polysomal mRNA
AT5G64250	6-26 Down	Polysomal mRNA
AT5G65165	6-26 Down	Polysomal mRNA
AT1G02500	26-48 Up	Polysomal mRNA
AT1G02640	26-48 Up	Polysomal mRNA
AT1G02920	26-48 Up	Polysomal mRNA
AT1G02930	26-48 Up	Polysomal mRNA
AT1G03630	26-48 Up	Polysomal mRNA
AT1G03870	26-48 Up	Polysomal mRNA
AT1G04420	26-48 Up	Polysomal mRNA
AT1G05260	26-48 Up	Polysomal mRNA
AT1G06680	26-48 Up	Polysomal mRNA
AT1G07040	26-48 Up	Polysomal mRNA
AT1G07890	26-48 Up	Polysomal mRNA
AT1G09310	26-48 Up	Polysomal mRNA
AT1G09340	26-48 Up	Polysomal mRNA
AT1G09750	26-48 Up	Polysomal mRNA
AT1G09780	26-48 Up	Polysomal mRNA
AT1G10670	26-48 Up	Polysomal mRNA
AT1G11860	26-48 Up	Polysomal mRNA
AT1G12900	26-48 Up	Polysomal mRNA
AT1G15820	26-48 Up	Polysomal mRNA
AT1G16880	26-48 Up	Polysomal mRNA
AT1G17650	26-48 Up	Polysomal mRNA
AT1G20020	26-48 Up	Polysomal mRNA
AT1G20340	26-48 Up	Polysomal mRNA
AT1G23740	26-48 Up	Polysomal mRNA
AT1G24020	26-48 Up	Polysomal mRNA
AT1G29670	26-48 Up	Polysomal mRNA
AT1G30120	26-48 Up	Polysomal mRNA
AT1G31812	26-48 Up	Polysomal mRNA
AT1G32060	26-48 Up	Polysomal mRNA
AT1G32470	26-48 Up	Polysomal mRNA
AT1G35720	26-48 Up	Polysomal mRNA
AT1G42970	26-48 Up	Polysomal mRNA
AT1G47128	26-48 Up	Polysomal mRNA
AT1G54000	26-48 Up	Polysomal mRNA
AT1G54010	26-48 Up	Polysomal mRNA
AT1G54410	26-48 Up	Polysomal mRNA
AT1G55020	26-48 Up	Polysomal mRNA
AT1G56190	26-48 Up	Polysomal mRNA
AT1G61520	26-48 Up	Polysomal mRNA
AT1G62380	26-48 Up	Polysomal mRNA
AT1G62660	26-48 Up	Polysomal mRNA
AT1G62750	26-48 Up	Polysomal mRNA
AT1G66270	26-48 Up	Polysomal mRNA
AT1G68010	26-48 Up	Polysomal mRNA
AT1G70830	26-48 Up	Polysomal mRNA
AT1G71695	26-48 Up	Polysomal mRNA
AT1G72150	26-48 Up	Polysomal mRNA
AT1G72970	26-48 Up	Polysomal mRNA
AT1G74470	26-48 Up	Polysomal mRNA
AT1G76450	26-48 Up	Polysomal mRNA
AT1G76680	26-48 Up	Polysomal mRNA
AT1G78570	26-48 Up	Polysomal mRNA
AT1G78850	26-48 Up	Polysomal mRNA
AT2G04780	26-48 Up	Polysomal mRNA
AT2G05920	26-48 Up	Polysomal mRNA
AT2G19760	26-48 Up	Polysomal mRNA
AT2G20260	26-48 Up	Polysomal mRNA
AT2G21530	26-48 Up	Polysomal mRNA
AT2G22170	26-48 Up	Polysomal mRNA
AT2G24580	26-48 Up	Polysomal mRNA
AT2G30870	26-48 Up	Polysomal mRNA
AT2G30930	26-48 Up	Polysomal mRNA
AT2G30950	26-48 Up	Polysomal mRNA
AT2G31570	26-48 Up	Polysomal mRNA
AT2G34420	26-48 Up	Polysomal mRNA
AT2G34430	26-48 Up	Polysomal mRNA
AT2G35370	26-48 Up	Polysomal mRNA
AT2G36880	26-48 Up	Polysomal mRNA
AT2G38530	26-48 Up	Polysomal mRNA
AT2G38540	26-48 Up	Polysomal mRNA
AT2G39080	26-48 Up	Polysomal mRNA
AT2G39310	26-48 Up	Polysomal mRNA
AT2G39730	26-48 Up	Polysomal mRNA
AT2G40490	26-48 Up	Polysomal mRNA
AT2G43030	26-48 Up	Polysomal mRNA
AT2G43560	26-48 Up	Polysomal mRNA
AT2G43710	26-48 Up	Polysomal mRNA
AT2G43910	26-48 Up	Polysomal mRNA
AT2G44650	26-48 Up	Polysomal mRNA
AT2G44790	26-48 Up	Polysomal mRNA
AT2G44920	26-48 Up	Polysomal mRNA
AT3G01480	26-48 Up	Polysomal mRNA
AT3G02730	26-48 Up	Polysomal mRNA
AT3G03780	26-48 Up	Polysomal mRNA
AT3G08940	26-48 Up	Polysomal mRNA
AT3G09260	26-48 Up	Polysomal mRNA
AT3G10410	26-48 Up	Polysomal mRNA
AT3G12780	26-48 Up	Polysomal mRNA
AT3G14067	26-48 Up	Polysomal mRNA
AT3G14420	26-48 Up	Polysomal mRNA
AT3G14930	26-48 Up	Polysomal mRNA
AT3G15356	26-48 Up	Polysomal mRNA
AT3G15360	26-48 Up	Polysomal mRNA
AT3G15950	26-48 Up	Polysomal mRNA
AT3G16400	26-48 Up	Polysomal mRNA
AT3G16430	26-48 Up	Polysomal mRNA
AT3G16450	26-48 Up	Polysomal mRNA
AT3G16460	26-48 Up	Polysomal mRNA
AT3G17210	26-48 Up	Polysomal mRNA
AT3G18780	26-48 Up	Polysomal mRNA
AT3G22200	26-48 Up	Polysomal mRNA
AT3G26450	26-48 Up	Polysomal mRNA
AT3G26650	26-48 Up	Polysomal mRNA
AT3G26720	26-48 Up	Polysomal mRNA
AT3G26900	26-48 Up	Polysomal mRNA
AT3G44620	26-48 Up	Polysomal mRNA
AT3G50820	26-48 Up	Polysomal mRNA
AT3G52880	26-48 Up	Polysomal mRNA
AT3G54050	26-48 Up	Polysomal mRNA
AT3G54400	26-48 Up	Polysomal mRNA
AT3G54960	26-48 Up	Polysomal mRNA
AT3G55800	26-48 Up	Polysomal mRNA
AT3G56240	26-48 Up	Polysomal mRNA
AT3G59970	26-48 Up	Polysomal mRNA
AT3G61440	26-48 Up	Polysomal mRNA
AT3G63140	26-48 Up	Polysomal mRNA
AT4G01310	26-48 Up	Polysomal mRNA
AT4G01690	26-48 Up	Polysomal mRNA
AT4G01700	26-48 Up	Polysomal mRNA
AT4G02770	26-48 Up	Polysomal mRNA
AT4G04460	26-48 Up	Polysomal mRNA
AT4G04640	26-48 Up	Polysomal mRNA
AT4G05180	26-48 Up	Polysomal mRNA
AT4G09010	26-48 Up	Polysomal mRNA
AT4G12420	26-48 Up	Polysomal mRNA
AT4G12730	26-48 Up	Polysomal mRNA
AT4G14040	26-48 Up	Polysomal mRNA
AT4G16760	26-48 Up	Polysomal mRNA
AT4G18480	26-48 Up	Polysomal mRNA
AT4G18970	26-48 Up	Polysomal mRNA
AT4G20260	26-48 Up	Polysomal mRNA
AT4G21280	26-48 Up	Polysomal mRNA
AT4G23670	26-48 Up	Polysomal mRNA
AT4G23680	26-48 Up	Polysomal mRNA
AT4G25080	26-48 Up	Polysomal mRNA
AT4G25100	26-48 Up	Polysomal mRNA
AT4G26010	26-48 Up	Polysomal mRNA
AT4G26690	26-48 Up	Polysomal mRNA
AT4G27440	26-48 Up	Polysomal mRNA
AT4G27520	26-48 Up	Polysomal mRNA
AT4G28750	26-48 Up	Polysomal mRNA
AT4G29270	26-48 Up	Polysomal mRNA
AT4G30170	26-48 Up	Polysomal mRNA
AT4G31840	26-48 Up	Polysomal mRNA
AT4G33010	26-48 Up	Polysomal mRNA
AT4G33030	26-48 Up	Polysomal mRNA
AT4G34050	26-48 Up	Polysomal mRNA
AT4G36360	26-48 Up	Polysomal mRNA
AT4G37930	26-48 Up	Polysomal mRNA
AT4G38970	26-48 Up	Polysomal mRNA
AT4G39090	26-48 Up	Polysomal mRNA
AT4G39330	26-48 Up	Polysomal mRNA
AT5G02240	26-48 Up	Polysomal mRNA
AT5G02790	26-48 Up	Polysomal mRNA
AT5G03630	26-48 Up	Polysomal mRNA
AT5G04740	26-48 Up	Polysomal mRNA
AT5G06290	26-48 Up	Polysomal mRNA
AT5G07030	26-48 Up	Polysomal mRNA
AT5G09660	26-48 Up	Polysomal mRNA
AT5G10560	26-48 Up	Polysomal mRNA
AT5G13630	26-48 Up	Polysomal mRNA
AT5G14740	26-48 Up	Polysomal mRNA
AT5G15230	26-48 Up	Polysomal mRNA
AT5G17820	26-48 Up	Polysomal mRNA
AT5G19220	26-48 Up	Polysomal mRNA
AT5G19940	26-48 Up	Polysomal mRNA
AT5G23120	26-48 Up	Polysomal mRNA
AT5G23820	26-48 Up	Polysomal mRNA
AT5G26260	26-48 Up	Polysomal mRNA
AT5G26280	26-48 Up	Polysomal mRNA
AT5G28050	26-48 Up	Polysomal mRNA
AT5G34850	26-48 Up	Polysomal mRNA
AT5G35630	26-48 Up	Polysomal mRNA
AT5G38410	26-48 Up	Polysomal mRNA
AT5G38430	26-48 Up	Polysomal mRNA
AT5G39320	26-48 Up	Polysomal mRNA
AT5G39580	26-48 Up	Polysomal mRNA
AT5G43060	26-48 Up	Polysomal mRNA
AT5G45930	26-48 Up	Polysomal mRNA
AT5G46230	26-48 Up	Polysomal mRNA
AT5G48230	26-48 Up	Polysomal mRNA
AT5G49360	26-48 Up	Polysomal mRNA
AT5G49460	26-48 Up	Polysomal mRNA
AT5G54160	26-48 Up	Polysomal mRNA
AT5G54190	26-48 Up	Polysomal mRNA
AT5G55220	26-48 Up	Polysomal mRNA
AT5G55730	26-48 Up	Polysomal mRNA
AT5G58330	26-48 Up	Polysomal mRNA
AT5G63570	26-48 Up	Polysomal mRNA
AT5G63800	26-48 Up	Polysomal mRNA
AT5G64100	26-48 Up	Polysomal mRNA
AT5G64120	26-48 Up	Polysomal mRNA
AT5G64570	26-48 Up	Polysomal mRNA
AT5G65020	26-48 Up	Polysomal mRNA
AT5G66190	26-48 Up	Polysomal mRNA
AT5G66570	26-48 Up	Polysomal mRNA
AT1G01470	26-48 Down	Polysomal mRNA
AT1G03880	26-48 Down	Polysomal mRNA
AT1G04560	26-48 Down	Polysomal mRNA
AT1G05510	26-48 Down	Polysomal mRNA
AT1G07645	26-48 Down	Polysomal mRNA
AT1G12270	26-48 Down	Polysomal mRNA
AT1G12520	26-48 Down	Polysomal mRNA
AT1G14930	26-48 Down	Polysomal mRNA
AT1G14940	26-48 Down	Polysomal mRNA
AT1G14950	26-48 Down	Polysomal mRNA
AT1G15330	26-48 Down	Polysomal mRNA
AT1G15340	26-48 Down	Polysomal mRNA
AT1G16030	26-48 Down	Polysomal mRNA
AT1G16770	26-48 Down	Polysomal mRNA
AT1G18100	26-48 Down	Polysomal mRNA
AT1G18800	26-48 Down	Polysomal mRNA
AT1G27130	26-48 Down	Polysomal mRNA
AT1G29680	26-48 Down	Polysomal mRNA
AT1G47540	26-48 Down	Polysomal mRNA
AT1G47980	26-48 Down	Polysomal mRNA
AT1G48130	26-48 Down	Polysomal mRNA
AT1G48470	26-48 Down	Polysomal mRNA
AT1G52560	26-48 Down	Polysomal mRNA
AT1G52690	26-48 Down	Polysomal mRNA
AT1G53540	26-48 Down	Polysomal mRNA
AT1G54860	26-48 Down	Polysomal mRNA
AT1G54870	26-48 Down	Polysomal mRNA
AT1G56110	26-48 Down	Polysomal mRNA
AT1G62710	26-48 Down	Polysomal mRNA
AT1G64110	26-48 Down	Polysomal mRNA
AT1G66070	26-48 Down	Polysomal mRNA
AT1G69250	26-48 Down	Polysomal mRNA
AT1G70580	26-48 Down	Polysomal mRNA
AT1G70810	26-48 Down	Polysomal mRNA
AT1G70840	26-48 Down	Polysomal mRNA
AT1G74310	26-48 Down	Polysomal mRNA
AT1G74560	26-48 Down	Polysomal mRNA
AT1G75830	26-48 Down	Polysomal mRNA
AT1G77120	26-48 Down	Polysomal mRNA
AT2G02850	26-48 Down	Polysomal mRNA
AT2G02930	26-48 Down	Polysomal mRNA
AT2G15010	26-48 Down	Polysomal mRNA
AT2G18540	26-48 Down	Polysomal mRNA
AT2G18570	26-48 Down	Polysomal mRNA
AT2G19900	26-48 Down	Polysomal mRNA
AT2G20610	26-48 Down	Polysomal mRNA
AT2G21490	26-48 Down	Polysomal mRNA
AT2G25770	26-48 Down	Polysomal mRNA
AT2G25890	26-48 Down	Polysomal mRNA
AT2G25970	26-48 Down	Polysomal mRNA
AT2G25980	26-48 Down	Polysomal mRNA
AT2G28490	26-48 Down	Polysomal mRNA
AT2G32120	26-48 Down	Polysomal mRNA
AT2G33070	26-48 Down	Polysomal mRNA
AT2G33590	26-48 Down	Polysomal mRNA
AT2G34700	26-48 Down	Polysomal mRNA
AT2G35040	26-48 Down	Polysomal mRNA
AT2G35605	26-48 Down	Polysomal mRNA
AT2G36640	26-48 Down	Polysomal mRNA
AT2G40170	26-48 Down	Polysomal mRNA
AT2G42560	26-48 Down	Polysomal mRNA
AT2G46280	26-48 Down	Polysomal mRNA
AT3G01570	26-48 Down	Polysomal mRNA
AT3G02760	26-48 Down	Polysomal mRNA
AT3G05060	26-48 Down	Polysomal mRNA
AT3G05260	26-48 Down	Polysomal mRNA
AT3G07050	26-48 Down	Polysomal mRNA
AT3G07770	26-48 Down	Polysomal mRNA
AT3G10520	26-48 Down	Polysomal mRNA
AT3G11050	26-48 Down	Polysomal mRNA
AT3G12580	26-48 Down	Polysomal mRNA
AT3G12960	26-48 Down	Polysomal mRNA
AT3G15260	26-48 Down	Polysomal mRNA
AT3G15670	26-48 Down	Polysomal mRNA
AT3G16990	26-48 Down	Polysomal mRNA
AT3G17520	26-48 Down	Polysomal mRNA
AT3G18490	26-48 Down	Polysomal mRNA
AT3G21140	26-48 Down	Polysomal mRNA
AT3G21370	26-48 Down	Polysomal mRNA
AT3G21380	26-48 Down	Polysomal mRNA
AT3G22330	26-48 Down	Polysomal mRNA
AT3G22490	26-48 Down	Polysomal mRNA
AT3G22500	26-48 Down	Polysomal mRNA
AT3G22640	26-48 Down	Polysomal mRNA
AT3G23570	26-48 Down	Polysomal mRNA
AT3G26618	26-48 Down	Polysomal mRNA
AT3G44750	26-48 Down	Polysomal mRNA
AT3G45030	26-48 Down	Polysomal mRNA
AT3G46230	26-48 Down	Polysomal mRNA
AT3G50970	26-48 Down	Polysomal mRNA
AT3G50980	26-48 Down	Polysomal mRNA
AT3G51810	26-48 Down	Polysomal mRNA
AT3G51880	26-48 Down	Polysomal mRNA
AT3G53040	26-48 Down	Polysomal mRNA
AT3G54940	26-48 Down	Polysomal mRNA
AT3G56350	26-48 Down	Polysomal mRNA
AT3G58450	26-48 Down	Polysomal mRNA
AT4G00620	26-48 Down	Polysomal mRNA
AT4G02280	26-48 Down	Polysomal mRNA
AT4G02360	26-48 Down	Polysomal mRNA
AT4G02520	26-48 Down	Polysomal mRNA
AT4G05530	26-48 Down	Polysomal mRNA
AT4G10020	26-48 Down	Polysomal mRNA
AT4G12130	26-48 Down	Polysomal mRNA
AT4G12290	26-48 Down	Polysomal mRNA
AT4G12910	26-48 Down	Polysomal mRNA
AT4G15410	26-48 Down	Polysomal mRNA
AT4G16160	26-48 Down	Polysomal mRNA
AT4G21020	26-48 Down	Polysomal mRNA
AT4G24800	26-48 Down	Polysomal mRNA
AT4G25140	26-48 Down	Polysomal mRNA
AT4G25340	26-48 Down	Polysomal mRNA
AT4G25580	26-48 Down	Polysomal mRNA
AT4G25630	26-48 Down	Polysomal mRNA
AT4G26110	26-48 Down	Polysomal mRNA
AT4G26740	26-48 Down	Polysomal mRNA
AT4G27140	26-48 Down	Polysomal mRNA
AT4G27150	26-48 Down	Polysomal mRNA
AT4G27160	26-48 Down	Polysomal mRNA
AT4G27170	26-48 Down	Polysomal mRNA
AT4G28520	26-48 Down	Polysomal mRNA
AT4G30880	26-48 Down	Polysomal mRNA
AT4G32770	26-48 Down	Polysomal mRNA
AT4G36600	26-48 Down	Polysomal mRNA
AT4G36700	26-48 Down	Polysomal mRNA
AT4G38810	26-48 Down	Polysomal mRNA
AT4G39520	26-48 Down	Polysomal mRNA
AT5G01300	26-48 Down	Polysomal mRNA
AT5G01670	26-48 Down	Polysomal mRNA
AT5G05290	26-48 Down	Polysomal mRNA
AT5G06760	26-48 Down	Polysomal mRNA
AT5G11420	26-48 Down	Polysomal mRNA
AT5G12030	26-48 Down	Polysomal mRNA
AT5G14450	26-48 Down	Polysomal mRNA
AT5G14780	26-48 Down	Polysomal mRNA
AT5G18170	26-48 Down	Polysomal mRNA
AT5G19150	26-48 Down	Polysomal mRNA
AT5G20960	26-48 Down	Polysomal mRNA
AT5G22470	26-48 Down	Polysomal mRNA
AT5G22650	26-48 Down	Polysomal mRNA
AT5G22810	26-48 Down	Polysomal mRNA
AT5G25460	26-48 Down	Polysomal mRNA
AT5G27640	26-48 Down	Polysomal mRNA
AT5G35660	26-48 Down	Polysomal mRNA
AT5G39720	26-48 Down	Polysomal mRNA
AT5G40420	26-48 Down	Polysomal mRNA
AT5G44120	26-48 Down	Polysomal mRNA
AT5G44310	26-48 Down	Polysomal mRNA
AT5G45690	26-48 Down	Polysomal mRNA
AT5G47810	26-48 Down	Polysomal mRNA
AT5G51210	26-48 Down	Polysomal mRNA
AT5G52300	26-48 Down	Polysomal mRNA
AT5G54740	26-48 Down	Polysomal mRNA
AT5G55240	26-48 Down	Polysomal mRNA
AT5G57550	26-48 Down	Polysomal mRNA
AT5G58590	26-48 Down	Polysomal mRNA
AT5G63030	26-48 Down	Polysomal mRNA
AT5G65165	26-48 Down	Polysomal mRNA
AT5G66400	26-48 Down	Polysomal mRNA
AT5G67240	26-48 Down	Polysomal mRNA
AT5G67360	26-48 Down	Polysomal mRNA
AT1G01470	48-72 Up	Polysomal mRNA
AT1G02920	48-72 Up	Polysomal mRNA
AT1G06680	48-72 Up	Polysomal mRNA
AT1G09340	48-72 Up	Polysomal mRNA
AT1G09750	48-72 Up	Polysomal mRNA
AT1G12230	48-72 Up	Polysomal mRNA
AT1G12900	48-72 Up	Polysomal mRNA
AT1G15820	48-72 Up	Polysomal mRNA
AT1G17220	48-72 Up	Polysomal mRNA
AT1G20020	48-72 Up	Polysomal mRNA
AT1G20440	48-72 Up	Polysomal mRNA
AT1G29670	48-72 Up	Polysomal mRNA
AT1G32060	48-72 Up	Polysomal mRNA
AT1G54410	48-72 Up	Polysomal mRNA
AT1G61520	48-72 Up	Polysomal mRNA
AT1G62380	48-72 Up	Polysomal mRNA
AT1G68010	48-72 Up	Polysomal mRNA
AT1G72150	48-72 Up	Polysomal mRNA
AT1G76680	48-72 Up	Polysomal mRNA
AT2G20260	48-72 Up	Polysomal mRNA
AT2G22240	48-72 Up	Polysomal mRNA
AT2G34420	48-72 Up	Polysomal mRNA
AT2G34430	48-72 Up	Polysomal mRNA
AT2G38540	48-72 Up	Polysomal mRNA
AT2G43520	48-72 Up	Polysomal mRNA
AT2G43560	48-72 Up	Polysomal mRNA
AT3G01480	48-72 Up	Polysomal mRNA
AT3G02730	48-72 Up	Polysomal mRNA
AT3G08940	48-72 Up	Polysomal mRNA
AT3G14990	48-72 Up	Polysomal mRNA
AT3G18080	48-72 Up	Polysomal mRNA
AT3G26450	48-72 Up	Polysomal mRNA
AT3G26650	48-72 Up	Polysomal mRNA
AT3G45780	48-72 Up	Polysomal mRNA
AT3G50820	48-72 Up	Polysomal mRNA
AT3G50970	48-72 Up	Polysomal mRNA
AT3G54050	48-72 Up	Polysomal mRNA
AT3G54400	48-72 Up	Polysomal mRNA
AT3G63140	48-72 Up	Polysomal mRNA
AT4G02520	48-72 Up	Polysomal mRNA
AT4G02770	48-72 Up	Polysomal mRNA
AT4G05180	48-72 Up	Polysomal mRNA
AT4G16155	48-72 Up	Polysomal mRNA
AT4G20260	48-72 Up	Polysomal mRNA
AT4G27520	48-72 Up	Polysomal mRNA
AT4G28750	48-72 Up	Polysomal mRNA
AT4G32770	48-72 Up	Polysomal mRNA
AT4G33010	48-72 Up	Polysomal mRNA
AT4G37550	48-72 Up	Polysomal mRNA
AT5G02790	48-72 Up	Polysomal mRNA
AT5G07030	48-72 Up	Polysomal mRNA
AT5G14740	48-72 Up	Polysomal mRNA
AT5G14780	48-72 Up	Polysomal mRNA
AT5G19220	48-72 Up	Polysomal mRNA
AT5G24490	48-72 Up	Polysomal mRNA
AT5G26000	48-72 Up	Polysomal mRNA
AT5G35630	48-72 Up	Polysomal mRNA
AT5G39720	48-72 Up	Polysomal mRNA
AT5G45830	48-72 Up	Polysomal mRNA
AT5G51210	48-72 Up	Polysomal mRNA
AT5G64260	48-72 Up	Polysomal mRNA
AT5G66570	48-72 Up	Polysomal mRNA
AT1G04170	48-72 Down	Polysomal mRNA
AT1G04980	48-72 Down	Polysomal mRNA
AT1G06290	48-72 Down	Polysomal mRNA
AT1G07830	48-72 Down	Polysomal mRNA
AT1G11580	48-72 Down	Polysomal mRNA
AT1G13270	48-72 Down	Polysomal mRNA
AT1G14930	48-72 Down	Polysomal mRNA
AT1G15930	48-72 Down	Polysomal mRNA
AT1G17020	48-72 Down	Polysomal mRNA
AT1G18800	48-72 Down	Polysomal mRNA
AT1G27400	48-72 Down	Polysomal mRNA
AT1G29150	48-72 Down	Polysomal mRNA
AT1G33790	48-72 Down	Polysomal mRNA
AT1G41880	48-72 Down	Polysomal mRNA
AT1G43780	48-72 Down	Polysomal mRNA
AT1G48470	48-72 Down	Polysomal mRNA
AT1G48630	48-72 Down	Polysomal mRNA
AT1G48920	48-72 Down	Polysomal mRNA
AT1G49670	48-72 Down	Polysomal mRNA
AT1G50380	48-72 Down	Polysomal mRNA
AT1G53070	48-72 Down	Polysomal mRNA
AT1G53580	48-72 Down	Polysomal mRNA
AT1G54000	48-72 Down	Polysomal mRNA
AT1G56110	48-72 Down	Polysomal mRNA
AT1G56340	48-72 Down	Polysomal mRNA
AT1G57660	48-72 Down	Polysomal mRNA
AT1G64970	48-72 Down	Polysomal mRNA
AT1G69250	48-72 Down	Polysomal mRNA
AT1G74560	48-72 Down	Polysomal mRNA
AT1G75830	48-72 Down	Polysomal mRNA
AT1G77120	48-72 Down	Polysomal mRNA
AT1G77510	48-72 Down	Polysomal mRNA
AT1G77940	48-72 Down	Polysomal mRNA
AT1G78060	48-72 Down	Polysomal mRNA
AT2G02740	48-72 Down	Polysomal mRNA
AT2G04030	48-72 Down	Polysomal mRNA
AT2G04780	48-72 Down	Polysomal mRNA
AT2G18570	48-72 Down	Polysomal mRNA
AT2G19590	48-72 Down	Polysomal mRNA
AT2G23350	48-72 Down	Polysomal mRNA
AT2G25980	48-72 Down	Polysomal mRNA
AT2G27710	48-72 Down	Polysomal mRNA
AT2G32060	48-72 Down	Polysomal mRNA
AT2G33210	48-72 Down	Polysomal mRNA
AT2G34040	48-72 Down	Polysomal mRNA
AT2G35605	48-72 Down	Polysomal mRNA
AT2G37270	48-72 Down	Polysomal mRNA
AT2G42740	48-72 Down	Polysomal mRNA
AT2G42910	48-72 Down	Polysomal mRNA
AT2G43770	48-72 Down	Polysomal mRNA
AT2G44040	48-72 Down	Polysomal mRNA
AT2G44050	48-72 Down	Polysomal mRNA
AT2G45240	48-72 Down	Polysomal mRNA
AT2G46280	48-72 Down	Polysomal mRNA
AT2G47580	48-72 Down	Polysomal mRNA
AT3G05060	48-72 Down	Polysomal mRNA
AT3G05190	48-72 Down	Polysomal mRNA
AT3G07050	48-72 Down	Polysomal mRNA
AT3G07110	48-72 Down	Polysomal mRNA
AT3G10090	48-72 Down	Polysomal mRNA
AT3G12145	48-72 Down	Polysomal mRNA
AT3G12580	48-72 Down	Polysomal mRNA
AT3G13860	48-72 Down	Polysomal mRNA
AT3G14310	48-72 Down	Polysomal mRNA
AT3G17170	48-72 Down	Polysomal mRNA
AT3G23570	48-72 Down	Polysomal mRNA
AT3G23990	48-72 Down	Polysomal mRNA
AT3G44590	48-72 Down	Polysomal mRNA
AT3G44750	48-72 Down	Polysomal mRNA
AT3G48700	48-72 Down	Polysomal mRNA
AT3G49010	48-72 Down	Polysomal mRNA
AT3G50980	48-72 Down	Polysomal mRNA
AT3G52140	48-72 Down	Polysomal mRNA
AT3G53430	48-72 Down	Polysomal mRNA
AT3G53890	48-72 Down	Polysomal mRNA
AT3G54470	48-72 Down	Polysomal mRNA
AT3G55010	48-72 Down	Polysomal mRNA
AT4G00620	48-72 Down	Polysomal mRNA
AT4G05390	48-72 Down	Polysomal mRNA
AT4G11120	48-72 Down	Polysomal mRNA
AT4G12910	48-72 Down	Polysomal mRNA
AT4G13850	48-72 Down	Polysomal mRNA
AT4G14430	48-72 Down	Polysomal mRNA
AT4G15530	48-72 Down	Polysomal mRNA
AT4G25340	48-72 Down	Polysomal mRNA
AT4G25630	48-72 Down	Polysomal mRNA
AT4G26010	48-72 Down	Polysomal mRNA
AT4G30170	48-72 Down	Polysomal mRNA
AT4G31120	48-72 Down	Polysomal mRNA
AT4G32520	48-72 Down	Polysomal mRNA
AT4G32720	48-72 Down	Polysomal mRNA
AT4G34555	48-72 Down	Polysomal mRNA
AT4G36130	48-72 Down	Polysomal mRNA
AT4G39260	48-72 Down	Polysomal mRNA
AT5G05290	48-72 Down	Polysomal mRNA
AT5G07460	48-72 Down	Polysomal mRNA
AT5G08260	48-72 Down	Polysomal mRNA
AT5G09590	48-72 Down	Polysomal mRNA
AT5G10920	48-72 Down	Polysomal mRNA
AT5G12110	48-72 Down	Polysomal mRNA
AT5G14450	48-72 Down	Polysomal mRNA
AT5G20160	48-72 Down	Polysomal mRNA
AT5G20400	48-72 Down	Polysomal mRNA
AT5G23740	48-72 Down	Polysomal mRNA
AT5G27410	48-72 Down	Polysomal mRNA
AT5G40770	48-72 Down	Polysomal mRNA
AT5G41970	48-72 Down	Polysomal mRNA
AT5G43960	48-72 Down	Polysomal mRNA
AT5G46180	48-72 Down	Polysomal mRNA
AT5G47930	48-72 Down	Polysomal mRNA
AT5G50370	48-72 Down	Polysomal mRNA
AT5G54900	48-72 Down	Polysomal mRNA
AT5G55480	48-72 Down	Polysomal mRNA
AT5G56260	48-72 Down	Polysomal mRNA
AT1G09780	Dry-6 Up	Protein
AT1G33790	Dry-6 Up	Protein
AT1G78900	Dry-6 Up	Protein
AT2G35490	Dry-6 Up	Protein
AT4G24800	Dry-6 Up	Protein
AT1G06680	Dry-6 Down	Protein
AT1G48920	Dry-6 Down	Protein
AT3G44750	Dry-6 Down	Protein
AT4G02770	Dry-6 Down	Protein
AT5G22650	Dry-6 Down	Protein
AT5G24490	Dry-6 Down	Protein
AT5G54760	Dry-6 Down	Protein
AT1G02780	6-26 Up	Protein
AT1G03475	6-26 Up	Protein
AT1G04820	6-26 Up	Protein
AT1G06290	6-26 Up	Protein
AT1G10590	6-26 Up	Protein
AT1G12780	6-26 Up	Protein
AT1G14320	6-26 Up	Protein
AT1G14980	6-26 Up	Protein
AT1G18540	6-26 Up	Protein
AT1G18800	6-26 Up	Protein
AT1G32200	6-26 Up	Protein
AT1G32990	6-26 Up	Protein
AT1G33790	6-26 Up	Protein
AT1G43170	6-26 Up	Protein
AT1G43670	6-26 Up	Protein
AT1G48630	6-26 Up	Protein
AT1G48920	6-26 Up	Protein
AT1G53580	6-26 Up	Protein
AT1G55490	6-26 Up	Protein
AT1G56110	6-26 Up	Protein
AT1G69620	6-26 Up	Protein
AT1G70410	6-26 Up	Protein
AT1G70600	6-26 Up	Protein
AT1G74060	6-26 Up	Protein
AT1G78060	6-26 Up	Protein
AT1G79530	6-26 Up	Protein
AT1G80410	6-26 Up	Protein
AT2G04030	6-26 Up	Protein
AT2G05710	6-26 Up	Protein
AT2G18020	6-26 Up	Protein
AT2G19480	6-26 Up	Protein
AT2G26080	6-26 Up	Protein
AT2G28000	6-26 Up	Protein
AT2G30860	6-26 Up	Protein
AT2G30970	6-26 Up	Protein
AT2G33210	6-26 Up	Protein
AT2G34480	6-26 Up	Protein
AT2G35040	6-26 Up	Protein
AT2G38230	6-26 Up	Protein
AT2G42520	6-26 Up	Protein
AT2G43090	6-26 Up	Protein
AT2G47510	6-26 Up	Protein
AT3G03960	6-26 Up	Protein
AT3G04400	6-26 Up	Protein
AT3G05060	6-26 Up	Protein
AT3G06860	6-26 Up	Protein
AT3G07110	6-26 Up	Protein
AT3G07770	6-26 Up	Protein
AT3G08030	6-26 Up	Protein
AT3G09260	6-26 Up	Protein
AT3G09630	6-26 Up	Protein
AT3G13460	6-26 Up	Protein
AT3G13860	6-26 Up	Protein
AT3G14310	6-26 Up	Protein
AT3G14415	6-26 Up	Protein
AT3G17390	6-26 Up	Protein
AT3G18490	6-26 Up	Protein
AT3G21720	6-26 Up	Protein
AT3G22890	6-26 Up	Protein
AT3G23990	6-26 Up	Protein
AT3G25230	6-26 Up	Protein
AT3G44750	6-26 Up	Protein
AT3G45310	6-26 Up	Protein
AT3G47370	6-26 Up	Protein
AT3G47800	6-26 Up	Protein
AT3G48930	6-26 Up	Protein
AT3G49910	6-26 Up	Protein
AT3G53020	6-26 Up	Protein
AT3G53430	6-26 Up	Protein
AT3G53740	6-26 Up	Protein
AT3G54470	6-26 Up	Protein
AT3G57610	6-26 Up	Protein
AT3G58610	6-26 Up	Protein
AT3G58750	6-26 Up	Protein
AT3G59920	6-26 Up	Protein
AT3G62530	6-26 Up	Protein
AT4G01610	6-26 Up	Protein
AT4G01850	6-26 Up	Protein
AT4G02930	6-26 Up	Protein
AT4G05390	6-26 Up	Protein
AT4G08390	6-26 Up	Protein
AT4G10480	6-26 Up	Protein
AT4G11120	6-26 Up	Protein
AT4G11420	6-26 Up	Protein
AT4G13430	6-26 Up	Protein
AT4G13850	6-26 Up	Protein
AT4G15000	6-26 Up	Protein
AT4G17040	6-26 Up	Protein
AT4G17390	6-26 Up	Protein
AT4G17870	6-26 Up	Protein
AT4G18100	6-26 Up	Protein
AT4G19006	6-26 Up	Protein
AT4G25340	6-26 Up	Protein
AT4G25630	6-26 Up	Protein
AT4G26110	6-26 Up	Protein
AT4G31120	6-26 Up	Protein
AT4G32720	6-26 Up	Protein
AT4G33090	6-26 Up	Protein
AT4G33680	6-26 Up	Protein
AT4G34110	6-26 Up	Protein
AT4G34620	6-26 Up	Protein
AT4G34670	6-26 Up	Protein
AT4G37870	6-26 Up	Protein
AT4G37910	6-26 Up	Protein
AT4G37930	6-26 Up	Protein
AT4G38710	6-26 Up	Protein
AT4G39200	6-26 Up	Protein
AT5G02050	6-26 Up	Protein
AT5G02870	6-26 Up	Protein
AT5G03860	6-26 Up	Protein
AT5G05290	6-26 Up	Protein
AT5G08260	6-26 Up	Protein
AT5G09510	6-26 Up	Protein
AT5G10360	6-26 Up	Protein
AT5G11420	6-26 Up	Protein
AT5G11520	6-26 Up	Protein
AT5G14450	6-26 Up	Protein
AT5G17710	6-26 Up	Protein
AT5G19440	6-26 Up	Protein
AT5G23140	6-26 Up	Protein
AT5G23540	6-26 Up	Protein
AT5G25460	6-26 Up	Protein
AT5G26667	6-26 Up	Protein
AT5G27850	6-26 Up	Protein
AT5G30510	6-26 Up	Protein
AT5G37600	6-26 Up	Protein
AT5G42890	6-26 Up	Protein
AT5G47210	6-26 Up	Protein
AT5G49190	6-26 Up	Protein
AT5G52650	6-26 Up	Protein
AT5G56260	6-26 Up	Protein
AT5G60790	6-26 Up	Protein
AT5G62690	6-26 Up	Protein
AT5G63310	6-26 Up	Protein
AT5G63400	6-26 Up	Protein
AT5G65110	6-26 Up	Protein
AT5G65720	6-26 Up	Protein
AT1G15330	6-26 Down	Protein
AT1G35680	6-26 Down	Protein
AT1G47260	6-26 Down	Protein
AT1G52560	6-26 Down	Protein
AT2G46140	6-26 Down	Protein
AT3G04790	6-26 Down	Protein
AT3G12960	6-26 Down	Protein
AT3G14067	6-26 Down	Protein
AT3G14990	6-26 Down	Protein
AT3G15640	6-26 Down	Protein
AT3G22490	6-26 Down	Protein
AT3G22500	6-26 Down	Protein
AT3G51810	6-26 Down	Protein
AT4G24620	6-26 Down	Protein
AT4G25580	6-26 Down	Protein
AT5G04885	6-26 Down	Protein
AT5G06290	6-26 Down	Protein
AT5G06760	6-26 Down	Protein
AT5G42020	6-26 Down	Protein
AT5G47550	6-26 Down	Protein
AT5G57550	6-26 Down	Protein
AT5G61510	6-26 Down	Protein
AT1G01320	26-48 Up	Protein
AT1G02500	26-48 Up	Protein
AT1G02640	26-48 Up	Protein
AT1G02920	26-48 Up	Protein
AT1G03475	26-48 Up	Protein
AT1G04820	26-48 Up	Protein
AT1G05190	26-48 Up	Protein
AT1G06290	26-48 Up	Protein
AT1G06680	26-48 Up	Protein
AT1G07320	26-48 Up	Protein
AT1G07660	26-48 Up	Protein
AT1G07890	26-48 Up	Protein
AT1G08200	26-48 Up	Protein
AT1G08360	26-48 Up	Protein
AT1G08520	26-48 Up	Protein
AT1G09130	26-48 Up	Protein
AT1G09200	26-48 Up	Protein
AT1G09210	26-48 Up	Protein
AT1G09270	26-48 Up	Protein
AT1G09310	26-48 Up	Protein
AT1G09780	26-48 Up	Protein
AT1G10290	26-48 Up	Protein
AT1G11580	26-48 Up	Protein
AT1G11650	26-48 Up	Protein
AT1G12000	26-48 Up	Protein
AT1G12270	26-48 Up	Protein
AT1G12310	26-48 Up	Protein
AT1G12410	26-48 Up	Protein
AT1G13270	26-48 Up	Protein
AT1G14810	26-48 Up	Protein
AT1G14980	26-48 Up	Protein
AT1G17650	26-48 Up	Protein
AT1G17880	26-48 Up	Protein
AT1G18500	26-48 Up	Protein
AT1G18540	26-48 Up	Protein
AT1G20440	26-48 Up	Protein
AT1G22450	26-48 Up	Protein
AT1G22530	26-48 Up	Protein
AT1G23740	26-48 Up	Protein
AT1G24020	26-48 Up	Protein
AT1G27090	26-48 Up	Protein
AT1G27310	26-48 Up	Protein
AT1G27400	26-48 Up	Protein
AT1G27450	26-48 Up	Protein
AT1G29370	26-48 Up	Protein
AT1G30120	26-48 Up	Protein
AT1G32200	26-48 Up	Protein
AT1G32990	26-48 Up	Protein
AT1G33040	26-48 Up	Protein
AT1G35680	26-48 Up	Protein
AT1G35720	26-48 Up	Protein
AT1G41880	26-48 Up	Protein
AT1G43670	26-48 Up	Protein
AT1G47128	26-48 Up	Protein
AT1G47260	26-48 Up	Protein
AT1G47420	26-48 Up	Protein
AT1G48350	26-48 Up	Protein
AT1G48630	26-48 Up	Protein
AT1G48920	26-48 Up	Protein
AT1G49600	26-48 Up	Protein
AT1G51510	26-48 Up	Protein
AT1G51980	26-48 Up	Protein
AT1G53580	26-48 Up	Protein
AT1G54000	26-48 Up	Protein
AT1G54410	26-48 Up	Protein
AT1G55020	26-48 Up	Protein
AT1G55490	26-48 Up	Protein
AT1G56190	26-48 Up	Protein
AT1G56700	26-48 Up	Protein
AT1G62390	26-48 Up	Protein
AT1G62750	26-48 Up	Protein
AT1G62780	26-48 Up	Protein
AT1G63000	26-48 Up	Protein
AT1G63940	26-48 Up	Protein
AT1G64970	26-48 Up	Protein
AT1G66270	26-48 Up	Protein
AT1G66410	26-48 Up	Protein
AT1G67090	26-48 Up	Protein
AT1G70410	26-48 Up	Protein
AT1G70830	26-48 Up	Protein
AT1G73230	26-48 Up	Protein
AT1G74100	26-48 Up	Protein
AT1G74560	26-48 Up	Protein
AT1G74970	26-48 Up	Protein
AT1G75270	26-48 Up	Protein
AT1G75350	26-48 Up	Protein
AT1G78060	26-48 Up	Protein
AT1G78570	26-48 Up	Protein
AT1G78630	26-48 Up	Protein
AT1G79850	26-48 Up	Protein
AT1G79930	26-48 Up	Protein
AT1G80460	26-48 Up	Protein
AT1G80480	26-48 Up	Protein
AT2G02740	26-48 Up	Protein
AT2G04030	26-48 Up	Protein
AT2G04400	26-48 Up	Protein
AT2G05220	26-48 Up	Protein
AT2G05710	26-48 Up	Protein
AT2G16430	26-48 Up	Protein
AT2G17390	26-48 Up	Protein
AT2G17420	26-48 Up	Protein
AT2G17560	26-48 Up	Protein
AT2G18020	26-48 Up	Protein
AT2G18040	26-48 Up	Protein
AT2G18110	26-48 Up	Protein
AT2G19480	26-48 Up	Protein
AT2G19590	26-48 Up	Protein
AT2G20610	26-48 Up	Protein
AT2G20890	26-48 Up	Protein
AT2G21330	26-48 Up	Protein
AT2G21870	26-48 Up	Protein
AT2G25970	26-48 Up	Protein
AT2G25980	26-48 Up	Protein
AT2G28000	26-48 Up	Protein
AT2G30060	26-48 Up	Protein
AT2G30860	26-48 Up	Protein
AT2G30870	26-48 Up	Protein
AT2G30970	26-48 Up	Protein
AT2G31390	26-48 Up	Protein
AT2G31570	26-48 Up	Protein
AT2G33800	26-48 Up	Protein
AT2G34470	26-48 Up	Protein
AT2G34640	26-48 Up	Protein
AT2G35010	26-48 Up	Protein
AT2G35370	26-48 Up	Protein
AT2G35490	26-48 Up	Protein
AT2G36880	26-48 Up	Protein
AT2G37220	26-48 Up	Protein
AT2G37660	26-48 Up	Protein
AT2G38040	26-48 Up	Protein
AT2G38230	26-48 Up	Protein
AT2G38540	26-48 Up	Protein
AT2G39310	26-48 Up	Protein
AT2G39390	26-48 Up	Protein
AT2G39730	26-48 Up	Protein
AT2G40490	26-48 Up	Protein
AT2G40765	26-48 Up	Protein
AT2G43030	26-48 Up	Protein
AT2G43090	26-48 Up	Protein
AT2G43460	26-48 Up	Protein
AT2G43710	26-48 Up	Protein
AT2G43750	26-48 Up	Protein
AT2G43770	26-48 Up	Protein
AT2G43910	26-48 Up	Protein
AT2G44650	26-48 Up	Protein
AT2G45240	26-48 Up	Protein
AT2G45790	26-48 Up	Protein
AT2G46140	26-48 Up	Protein
AT2G47510	26-48 Up	Protein
AT2G47730	26-48 Up	Protein
AT3G01280	26-48 Up	Protein
AT3G02090	26-48 Up	Protein
AT3G02560	26-48 Up	Protein
AT3G03780	26-48 Up	Protein
AT3G05060	26-48 Up	Protein
[truncated: 746 more rows]

## Sheet: Supplemental Table 4
AGI	Delay group_poly	Delay group_protein	Gene description
AT1G02780	DUG_dry_6	DUG_6_26	Symbols: emb2386 | Ribosomal protein L19e family protein | chr1:607808-609465 REVERSE LENGTH=1031
AT1G10590	DUG_dry_6	DUG_6_26	Symbols: | Nucleic acid-binding, OB-fold-like protein | chr1:3502004-3503457 REVERSE LENGTH=837
AT1G12780	DUG_dry_6	DUG_6_26	Symbols: UGE1, ATUGE1 | UDP-D-glucose/UDP-D-galactose 4-epimerase 1 | chr1:4355926-4358328 REVERSE LENGTH=1462
AT1G14320	DUG_dry_6	DUG_6_26	Symbols: SAC52, RPL10A | Ribosomal protein L16p/L10e family protein | chr1:4888214-4889661 FORWARD LENGTH=801
AT1G14980	DUG_dry_6	DUG_6_26	Symbols: CPN10 | chaperonin 10 | chr1:5165628-5166745 REVERSE LENGTH=690
AT1G18540	DUG_dry_6	DUG_6_26	Symbols: | Ribosomal protein L6 family protein | chr1:6377321-6378580 REVERSE LENGTH=861
AT1G18800	DUG_dry_6	DUG_6_26	Symbols: NRP2 | NAP1-related protein 2 | chr1:6481113-6483596 REVERSE LENGTH=1257
AT1G32200	DUG_dry_6	DUG_6_26	Symbols: ATS1, ACT1 | phospholipid/glycerol acyltransferase family protein | chr1:11601781-11605060 REVERSE LENGTH=1787
AT1G32990	DUG_dry_6	DUG_6_26	Symbols: PRPL11 | plastid ribosomal protein l11 | chr1:11955785-11957284 FORWARD LENGTH=856
AT1G48630	DUG_dry_6	DUG_6_26	Symbols: RACK1B_AT | receptor for activated C kinase 1B | chr1:17981773-17983327 REVERSE LENGTH=1244
AT1G48920	DUG_dry_6	DUG_6_26	Symbols: ATNUC-L1, PARL1, NUC-L1 | nucleolin like 1 | chr1:18098095-18101623 FORWARD LENGTH=1966
AT1G53580	DUG_dry_6	DUG_6_26	Symbols: GLX2-3, ETHE1, GLY3 | glyoxalase II 3 | chr1:19991275-19993334 REVERSE LENGTH=1236
AT1G55490	DUG_dry_6	DUG_6_26	Symbols: CPN60B, LEN1 | chaperonin 60 beta | chr1:20715563-20719165 REVERSE LENGTH=2087
AT1G56110	DUG_dry_6	DUG_6_26	Symbols: NOP56 | homolog of nucleolar protein NOP56 | chr1:20984389-20986951 REVERSE LENGTH=1782
AT1G69620	DUG_dry_6	DUG_6_26	Symbols: RPL34 | ribosomal protein L34 | chr1:26189836-26191323 FORWARD LENGTH=666
AT1G70410	DUG_dry_6	DUG_6_26	Symbols: ATBCA4, BCA4 | beta carbonic anhydrase 4 | chr1:26533926-26536926 REVERSE LENGTH=1353
AT1G70600	DUG_dry_6	DUG_6_26	Symbols: | Ribosomal protein L18e/L15 superfamily protein | chr1:26620923-26621659 REVERSE LENGTH=737
AT1G74060	DUG_dry_6	DUG_6_26	Symbols: | Ribosomal protein L6 family protein | chr1:27849833-27851374 REVERSE LENGTH=977
AT2G18020	DUG_dry_6	DUG_6_26	Symbols: EMB2296 | Ribosomal protein L2 family | chr2:7837102-7838304 FORWARD LENGTH=970
AT2G19480	DUG_dry_6	DUG_6_26	Symbols: NAP1;2 | nucleosome assembly protein 1;2 | chr2:8438393-8441384 FORWARD LENGTH=1671
AT2G28000	DUG_dry_6	DUG_6_26	Symbols: CPN60A, CH-CPN60A, SLP | chaperonin-60alpha | chr2:11926449-11929389 FORWARD LENGTH=2120
AT2G30970	DUG_dry_6	DUG_6_26	Symbols: ASP1 | aspartate aminotransferase 1 | chr2:13178840-13181931 FORWARD LENGTH=1632
AT2G33210	DUG_dry_6	DUG_6_26	Symbols: HSP60-2 | heat shock protein 60-2 | chr2:14074870-14078744 REVERSE LENGTH=2142
AT2G34480	DUG_dry_6	DUG_6_26	Symbols: | Ribosomal protein L18ae/LX family protein | chr2:14532708-14534239 REVERSE LENGTH=823
AT2G35040	DUG_dry_6	DUG_6_26	Symbols: | AICARFT/IMPCHase bienzyme family protein | chr2:14765160-14768288 REVERSE LENGTH=1997
AT2G38230	DUG_dry_6	DUG_6_26	Symbols: ATPDX1.1, PDX1.1 | pyridoxine biosynthesis 1.1 | chr2:16011456-16012508 FORWARD LENGTH=1053
AT2G43090	DUG_dry_6	DUG_6_26	Symbols: | Aconitase/3-isopropylmalate dehydratase protein | chr2:17918927-17920429 FORWARD LENGTH=1046
AT2G47510	DUG_dry_6	DUG_6_26	Symbols: FUM1 | fumarase 1 | chr2:19498368-19502246 FORWARD LENGTH=1850
AT3G05060	DUG_dry_6	DUG_6_26	Symbols: | NOP56-like pre RNA processing ribonucleoprotein | chr3:1412867-1415966 REVERSE LENGTH=2016
AT3G07110	DUG_dry_6	DUG_6_26	Symbols: | Ribosomal protein L13 family protein | chr3:2252019-2253528 FORWARD LENGTH=890
AT3G08030	DUG_dry_6	DUG_6_26	Symbols: | Protein of unknown function, DUF642 | chr3:2564033-2566002 FORWARD LENGTH=1439
AT3G09630	DUG_dry_6	DUG_6_26	Symbols: | Ribosomal protein L4/L1 family | chr3:2953737-2955748 FORWARD LENGTH=1598
AT3G14310	DUG_dry_6	DUG_6_26	Symbols: ATPME3, PME3 | pectin methylesterase 3 | chr3:4771902-4775119 REVERSE LENGTH=2115
AT3G14415	DUG_dry_6	DUG_6_26	Symbols: | Aldolase-type TIM barrel family protein | chr3:4818298-4821006 FORWARD LENGTH=1617
AT3G17390	DUG_dry_6	DUG_6_26	Symbols: MTO3, SAMS3, MAT4 | S-adenosylmethionine synthetase family protein | chr3:5952187-5954084 REVERSE LENGTH=1690
AT3G25230	DUG_dry_6	DUG_6_26	Symbols: ROF1, ATFKBP62, FKBP62 | rotamase FKBP 1 | chr3:9188181-9191419 FORWARD LENGTH=2009
AT3G44750	DUG_dry_6	DUG_6_26	Symbols: HD2A, ATHD2A, HDA3, HDT1 | histone deacetylase 3 | chr3:16297979-16299779 FORWARD LENGTH=998
AT3G45310	DUG_dry_6	DUG_6_26	Symbols: | Cysteine proteinases superfamily protein | chr3:16628384-16630521 REVERSE LENGTH=1442
AT3G47370	DUG_dry_6	DUG_6_26	Symbols: | Ribosomal protein S10p/S20e family protein | chr3:17453478-17454524 REVERSE LENGTH=649
AT3G48930	DUG_dry_6	DUG_6_26	Symbols: EMB1080 | Nucleic acid-binding, OB-fold-like protein | chr3:18140771-18142281 REVERSE LENGTH=821
AT3G49910	DUG_dry_6	DUG_6_26	Symbols: | Translation protein SH3-like family protein | chr3:18504256-18504967 FORWARD LENGTH=712
AT3G53020	DUG_dry_6	DUG_6_26	Symbols: STV1, RPL24B, RPL24 | Ribosomal protein L24e family protein | chr3:19660517-19662025 REVERSE LENGTH=837
AT3G53430	DUG_dry_6	DUG_6_26	Symbols: | Ribosomal protein L11 family protein | chr3:19809687-19810469 REVERSE LENGTH=783
AT3G53740	DUG_dry_6	DUG_6_26	Symbols: | Ribosomal protein L36e family protein | chr3:19913707-19915016 REVERSE LENGTH=627
AT3G54470	DUG_dry_6	DUG_6_26	Symbols: | uridine 5'-monophosphate synthase / UMP synthase (PYRE-F) (UMPS) | chr3:20168095-20170303 REVERSE LENGTH=1679
AT3G62530	DUG_dry_6	DUG_6_26	Symbols: | ARM repeat superfamily protein | chr3:23132138-23133298 FORWARD LENGTH=924
AT4G01850	DUG_dry_6	DUG_6_26	Symbols: SAM-2, MAT2, SAM2, AtSAM2 | S-adenosylmethionine synthetase 2 | chr4:796097-798286 REVERSE LENGTH=1480
AT4G05390	DUG_dry_6	DUG_6_26	Symbols: ATRFNR1, RFNR1 | root FNR 1 | chr4:2738715-2740655 REVERSE LENGTH=1433
AT4G08390	DUG_dry_6	DUG_6_26	Symbols: SAPX | stromal ascorbate peroxidase | chr4:5314905-5317432 FORWARD LENGTH=1495
AT4G10480	DUG_dry_6	DUG_6_26	Symbols: | Nascent polypeptide-associated complex (NAC), alpha subunit family protein | chr4:6477876-6479165 REVERSE LENGTH=935
AT4G13850	DUG_dry_6	DUG_6_26	Symbols: ATGRP2 | glycine-rich RNA-binding protein 2 | chr4:8020951-8022221 FORWARD LENGTH=616
AT4G15000	DUG_dry_6	DUG_6_26	Symbols: | Ribosomal L27e protein family | chr4:8571833-8572489 FORWARD LENGTH=561
AT4G17390	DUG_dry_6	DUG_6_26	Symbols: | Ribosomal protein L23/L15e family protein | chr4:9714092-9715612 REVERSE LENGTH=997
AT4G17870	DUG_dry_6	DUG_6_26	Symbols: PYR1, RCAR11 | Polyketide cyclase/dehydrase and lipid transport superfamily protein | chr4:9928678-9929518 FORWARD LENGTH=841
AT4G18100	DUG_dry_6	DUG_6_26	Symbols: | Ribosomal protein L32e | chr4:10035485-10036541 REVERSE LENGTH=698
AT4G19006	DUG_dry_6	DUG_6_26	Symbols: | Proteasome component (PCI) domain protein | chr4:10409183-10411465 REVERSE LENGTH=1445
AT4G25340	DUG_dry_6	DUG_6_26	Symbols: FKBP53, ATFKBP53 | FK506 BINDING PROTEIN 53 | chr4:12959442-12962699 REVERSE LENGTH=1716
AT4G25630	DUG_dry_6	DUG_6_26	Symbols: FIB2, ATFIB2 | fibrillarin 2 | chr4:13074133-13076429 FORWARD LENGTH=1293
AT4G26110	DUG_dry_6	DUG_6_26	Symbols: NAP1;1, ATNAP1;1 | nucleosome assembly protein1;1 | chr4:13232595-13235879 FORWARD LENGTH=1613
AT4G32720	DUG_dry_6	DUG_6_26	Symbols: AtLa1, La1 | La protein 1 | chr4:15787209-15789901 FORWARD LENGTH=1624
AT4G34670	DUG_dry_6	DUG_6_26	Symbols: | Ribosomal protein S3Ae | chr4:16548618-16550453 FORWARD LENGTH=1126
AT4G37870	DUG_dry_6	DUG_6_26	Symbols: PCK1, PEPCK | phosphoenolpyruvate carboxykinase 1 | chr4:17802694-17806539 REVERSE LENGTH=2413
AT4G37910	DUG_dry_6	DUG_6_26	Symbols: mtHsc70-1 | mitochondrial heat shock protein 70-1 | chr4:17825080-17828180 REVERSE LENGTH=2418
AT4G38710	DUG_dry_6	DUG_6_26	Symbols: | glycine-rich protein | chr4:18077790-18080083 REVERSE LENGTH=1791
AT5G02870	DUG_dry_6	DUG_6_26	Symbols: | Ribosomal protein L4/L1 family | chr5:657786-659733 FORWARD LENGTH=1472
AT5G05290	DUG_dry_6	DUG_6_26	Symbols: ATEXPA2, EXP2, ATEXP2, ATHEXP ALPHA 1.12, EXPA2 | expansin A2 | chr5:1568694-1569864 FORWARD LENGTH=978
AT5G08260	DUG_dry_6	DUG_6_26	Symbols: scpl35 | serine carboxypeptidase-like 35 | chr5:2657151-2661416 FORWARD LENGTH=1672
AT5G09510	DUG_dry_6	DUG_6_26	Symbols: | Ribosomal protein S19 family protein | chr5:2955113-2956673 REVERSE LENGTH=1163
AT5G10360	DUG_dry_6	DUG_6_26	Symbols: EMB3010 | Ribosomal protein S6e | chr5:3258474-3260234 REVERSE LENGTH=946
AT5G11520	DUG_dry_6	DUG_6_26	Symbols: ASP3, YLS4 | aspartate aminotransferase 3 | chr5:3685089-3687764 REVERSE LENGTH=1561
AT5G14450	DUG_dry_6	DUG_6_26	Symbols: | GDSL-like Lipase/Acylhydrolase superfamily protein | chr5:4658441-4660175 FORWARD LENGTH=1358
AT5G19440	DUG_dry_6	DUG_6_26	Symbols: | NAD(P)-binding Rossmann-fold superfamily protein | chr5:6556420-6558342 FORWARD LENGTH=1273
AT5G25460	DUG_dry_6	DUG_6_26	Symbols: | Protein of unknown function, DUF642 | chr5:8863363-8865677 FORWARD LENGTH=1460
AT5G26667	DUG_dry_6	DUG_6_26	Symbols: PYR6 | P-loop containing nucleoside triphosphate hydrolases superfamily protein | chr5:9275947-9277971 FORWARD LENGTH=948
AT5G27850	DUG_dry_6	DUG_6_26	Symbols: | Ribosomal protein L18e/L15 superfamily protein | chr5:9873152-9874598 FORWARD LENGTH=882
AT5G47210	DUG_dry_6	DUG_6_26	Symbols: | Hyaluronan / mRNA binding family | chr5:19169022-19171263 REVERSE LENGTH=1302
AT5G52650	DUG_dry_6	DUG_6_26	Symbols: | RNA binding Plectin/S10 domain-containing protein | chr5:21355555-21357105 REVERSE LENGTH=868
AT5G56260	DUG_dry_6	DUG_6_26	Symbols: | Ribonuclease E inhibitor RraA/Dimethylmenaquinone methyltransferase | chr5:22775325-22777304 REVERSE LENGTH=1013
AT5G63310	DUG_dry_6	DUG_6_26	Symbols: NDPK2, NDPK1A, NDPK IA IA, NDPK IA, ATNDPK2 | nucleoside diphosphate kinase 2 | chr5:25371904-25373861 REVERSE LENGTH=937
AT5G63400	DUG_dry_6	DUG_6_26	Symbols: ADK1 | adenylate kinase 1 | chr5:25393001-25394907 REVERSE LENGTH=1073
AT5G65110	DUG_dry_6	DUG_6_26	Symbols: ACX2, ATACX2 | acyl-CoA oxidase 2 | chr5:26009635-26012514 REVERSE LENGTH=2297
AT1G02500	DUG_dry_6	DUG_26_48	Symbols: SAM1, SAM-1, MAT1, AtSAM1 | S-adenosylmethionine synthetase 1 | chr1:518251-520437 FORWARD LENGTH=1530
AT1G02920	DUG_dry_6	DUG_26_48	Symbols: ATGSTF7, GST11, ATGSTF8, GSTF7, ATGST11 | glutathione S-transferase 7 | chr1:658657-659771 REVERSE LENGTH=925
AT1G05190	DUG_dry_6	DUG_26_48	Symbols: emb2394 | Ribosomal protein L6 family | chr1:1502344-1503830 REVERSE LENGTH=935
AT1G07320	DUG_dry_6	DUG_26_48	Symbols: RPL4 | ribosomal protein L4 | chr1:2249133-2250527 FORWARD LENGTH=1238
AT1G07890	DUG_dry_6	DUG_26_48	Symbols: APX1, MEE6, CS1, ATAPX1, ATAPX01 | ascorbate peroxidase 1 | chr1:2437330-2439665 FORWARD LENGTH=1221
AT1G08360	DUG_dry_6	DUG_26_48	Symbols: | Ribosomal protein L1p/L10e family | chr1:2636011-2637915 FORWARD LENGTH=949
AT1G12000	DUG_dry_6	DUG_26_48	Symbols: | Phosphofructokinase family protein | chr1:4049896-4053835 REVERSE LENGTH=2072
AT1G12270	DUG_dry_6	DUG_26_48	Symbols: Hop1 | stress-inducible protein, putative | chr1:4172075-4174775 FORWARD LENGTH=1949
AT1G12410	DUG_dry_6	DUG_26_48	Symbols: CLPR2, NCLPP2, CLP2 | CLP protease proteolytic subunit 2 | chr1:4223030-4225124 FORWARD LENGTH=1079
AT1G13270	DUG_dry_6	DUG_26_48	Symbols: MAP1C, MAP1B | methionine aminopeptidase 1B | chr1:4544953-4547312 FORWARD LENGTH=1313
AT1G17650	DUG_dry_6	DUG_26_48	Symbols: GLYR2, GR2 | glyoxylate reductase 2 | chr1:6069477-6072012 REVERSE LENGTH=1242
AT1G17880	DUG_dry_6	DUG_26_48	Symbols: BTF3, ATBTF3 | basic transcription factor 3 | chr1:6152409-6153982 REVERSE LENGTH=778
AT1G22450	DUG_dry_6	DUG_26_48	Symbols: COX6B, ATCOX6B2 | cytochrome C oxidase 6B | chr1:7925121-7927278 FORWARD LENGTH=1262
AT1G22530	DUG_dry_6	DUG_26_48	Symbols: PATL2 | PATELLIN 2 | chr1:7955493-7958442 REVERSE LENGTH=2448
AT1G27090	DUG_dry_6	DUG_26_48	Symbols: | glycine-rich protein | chr1:9403900-9406256 REVERSE LENGTH=1562
AT1G27310	DUG_dry_6	DUG_26_48	Symbols: NTF2A | nuclear transport factor 2A | chr1:9484316-9485896 REVERSE LENGTH=774
AT1G27400	DUG_dry_6	DUG_26_48	Symbols: | Ribosomal protein L22p/L17e family protein | chr1:9515135-9516940 FORWARD LENGTH=841
AT1G27450	DUG_dry_6	DUG_26_48	Symbols: APT1 | adenine phosphoribosyl transferase 1 | chr1:9531839-9534041 FORWARD LENGTH=1292
AT1G33040	DUG_dry_6	DUG_26_48	Symbols: NACA5 | nascent polypeptide-associated complex subunit alpha-like protein 5 | chr1:11966470-11967843 FORWARD LENGTH=854
AT1G35680	DUG_dry_6	DUG_26_48	Symbols: | Ribosomal protein L21 | chr1:13208736-13210418 FORWARD LENGTH=876
AT1G41880	DUG_dry_6	DUG_26_48	Symbols: | Ribosomal protein L35Ae family protein | chr1:15651027-15652542 REVERSE LENGTH=729
AT1G49600	DUG_dry_6	DUG_26_48	Symbols: ATRBP47A, RBP47A | RNA-binding protein 47A | chr1:18356886-18360150 REVERSE LENGTH=1688
AT1G56190	DUG_dry_6	DUG_26_48	Symbols: | Phosphoglycerate kinase family protein | chr1:21028216-21030614 FORWARD LENGTH=1689
AT1G56700	DUG_dry_6	DUG_26_48	Symbols: | Peptidase C15, pyroglutamyl peptidase I-like | chr1:21256176-21257973 FORWARD LENGTH=1170
AT1G62390	DUG_dry_6	DUG_26_48	Symbols: Phox2 | Octicosapeptide/Phox/Bem1p (PB1) domain-containing protein / tetratricopeptide repeat (TPR)-containing protein | chr1:23084293-23087127 REVERSE LENGTH=2835
AT1G63940	DUG_dry_6	DUG_26_48	Symbols: MDAR6 | monodehydroascorbate reductase 6 | chr1:23729979-23733892 FORWARD LENGTH=1956
AT1G64970	DUG_dry_6	DUG_26_48	Symbols: G-TMT, TMT1, VTE4 | gamma-tocopherol methyltransferase | chr1:24134085-24136109 REVERSE LENGTH=1415
AT1G67090	DUG_dry_6	DUG_26_48	Symbols: RBCS1A | ribulose bisphosphate carboxylase small chain 1A | chr1:25048158-25049424 REVERSE LENGTH=1018
AT1G73230	DUG_dry_6	DUG_26_48	Symbols: | Nascent polypeptide-associated complex NAC | chr1:27540228-27541944 REVERSE LENGTH=901
AT1G74100	DUG_dry_6	DUG_26_48	Symbols: SOT16, ATSOT16, CORI-7, ATST5A | sulfotransferase 16 | chr1:27864345-27865694 REVERSE LENGTH=1350
AT1G74560	DUG_dry_6	DUG_26_48	Symbols: NRP1 | NAP1-related protein 1 | chr1:28017584-28020049 REVERSE LENGTH=1123
AT1G74970	DUG_dry_6	DUG_26_48	Symbols: RPS9, TWN3 | ribosomal protein S9 | chr1:28157530-28159302 REVERSE LENGTH=958
AT1G75270	DUG_dry_6	DUG_26_48	Symbols: DHAR2 | dehydroascorbate reductase 2 | chr1:28250075-28251350 REVERSE LENGTH=935
AT1G75350	DUG_dry_6	DUG_26_48	Symbols: emb2184 | Ribosomal protein L31 | chr1:28272071-28272832 FORWARD LENGTH=672
AT1G79850	DUG_dry_6	DUG_26_48	Symbols: RPS17, CS17, PRPS17 | ribosomal protein S17 | chr1:30041243-30041952 REVERSE LENGTH=710
AT1G80460	DUG_dry_6	DUG_26_48	Symbols: NHO1, GLI1 | Actin-like ATPase superfamily protein | chr1:30246745-30249305 REVERSE LENGTH=1914
AT2G05220	DUG_dry_6	DUG_26_48	Symbols: | Ribosomal S17 family protein | chr2:1894559-1896032 REVERSE LENGTH=730
AT2G16430	DUG_dry_6	DUG_26_48	Symbols: PAP10, ATPAP10 | purple acid phosphatase 10 | chr2:7120419-7122819 REVERSE LENGTH=1632
AT2G17390	DUG_dry_6	DUG_26_48	Symbols: AKR2B | ankyrin repeat-containing 2B | chr2:7555630-7558038 FORWARD LENGTH=1447
AT2G17420	DUG_dry_6	DUG_26_48	Symbols: NTRA, ATNTRA, NTR2 | NADPH-dependent thioredoxin reductase A | chr2:7564345-7566539 FORWARD LENGTH=1469
AT2G18040	DUG_dry_6	DUG_26_48	Symbols: PIN1AT | peptidylprolyl cis/trans isomerase, NIMA-interacting 1 | chr2:7842164-7843870 FORWARD LENGTH=875
AT2G18110	DUG_dry_6	DUG_26_48	Symbols: | Translation elongation factor EF1B/ribosomal protein S6 family protein | chr2:7872251-7873912 FORWARD LENGTH=978
AT2G21870	DUG_dry_6	DUG_26_48	Symbols: MGP1 | copper ion binding;cobalt ion binding;zinc ion binding | chr2:9320195-9322734 REVERSE LENGTH=1100
AT2G25970	DUG_dry_6	DUG_26_48	Symbols: | KH domain-containing protein | chr2:11071651-11075669 REVERSE LENGTH=2157
AT2G25980	DUG_dry_6	DUG_26_48	Symbols: | Mannose-binding lectin superfamily protein | chr2:11077488-11079918 REVERSE LENGTH=1627
AT2G30060	DUG_dry_6	DUG_26_48	Symbols: | Pleckstrin homology (PH) domain superfamily protein | chr2:12826915-12828919 FORWARD LENGTH=1142
AT2G31570	DUG_dry_6	DUG_26_48	Symbols: ATGPX2, GPX2 | glutathione peroxidase 2 | chr2:13437974-13439881 REVERSE LENGTH=853
AT2G34470	DUG_dry_6	DUG_26_48	Symbols: UREG, PSKF109 | urease accessory protein G | chr2:14530735-14532505 REVERSE LENGTH=1087
AT2G36880	DUG_dry_6	DUG_26_48	Symbols: MAT3 | methionine adenosyltransferase 3 | chr2:15479366-15481412 REVERSE LENGTH=1687
AT2G37660	DUG_dry_6	DUG_26_48	Symbols: | NAD(P)-binding Rossmann-fold superfamily protein | chr2:15795213-15797059 REVERSE LENGTH=1328
AT2G39390	DUG_dry_6	DUG_26_48	Symbols: | Ribosomal L29 family protein | chr2:16450660-16451878 REVERSE LENGTH=631
AT2G43460	DUG_dry_6	DUG_26_48	Symbols: | Ribosomal L38e protein family | chr2:18046004-18047401 REVERSE LENGTH=600
AT2G44650	DUG_dry_6	DUG_26_48	Symbols: CHL-CPN10, CPN10 | chloroplast chaperonin 10 | chr2:18419370-18421110 REVERSE LENGTH=1171
AT2G45790	DUG_dry_6	DUG_26_48	Symbols: ATPMM, PMM | phosphomannomutase | chr2:18855775-18858018 FORWARD LENGTH=1107
AT3G01280	DUG_dry_6	DUG_26_48	Symbols: VDAC1, ATVDAC1 | voltage dependent anion channel 1 | chr3:85601-87858 FORWARD LENGTH=1230
AT3G02560	DUG_dry_6	DUG_26_48	Symbols: | Ribosomal protein S7e family protein | chr3:541715-543385 FORWARD LENGTH=910
AT3G07050	DUG_dry_6	DUG_26_48	Symbols: | GTP-binding family protein | chr3:2229590-2232361 REVERSE LENGTH=1843
AT3G07480	DUG_dry_6	DUG_26_48	Symbols: | 2Fe-2S ferredoxin-like superfamily protein | chr3:2388952-2389811 FORWARD LENGTH=860
AT3G08580	DUG_dry_6	DUG_26_48	Symbols: AAC1 | ADP/ATP carrier 1 | chr3:2605442-2607573 REVERSE LENGTH=1460
AT3G09440	DUG_dry_6	DUG_26_48	Symbols: | Heat shock protein 70 (Hsp 70) family protein | chr3:2903198-2905729 REVERSE LENGTH=2193
AT3G10520	DUG_dry_6	DUG_26_48	Symbols: AHB2, GLB2, ARATH GLB2, NSHB2, ATGLB2, HB2 | haemoglobin 2 | chr3:3276226-3277860 REVERSE LENGTH=862
AT3G12050	DUG_dry_6	DUG_26_48	Symbols: | Aha1 domain-containing protein | chr3:3839102-3841466 FORWARD LENGTH=1316
AT3G12260	DUG_dry_6	DUG_26_48	Symbols: | LYR family of Fe/S cluster biogenesis protein | chr3:3908940-3910420 REVERSE LENGTH=797
AT3G13470	DUG_dry_6	DUG_26_48	Symbols: | TCP-1/cpn60 chaperonin family protein | chr3:4389256-4392801 FORWARD LENGTH=2093
AT3G16420	DUG_dry_6	DUG_26_48	Symbols: PBP1, JAL30 | PYK10-binding protein 1 | chr3:5579386-5580953 FORWARD LENGTH=1274
AT3G17170	DUG_dry_6	DUG_26_48	Symbols: RFC3 | Translation elongation factor EF1B/ribosomal protein S6 family protein | chr3:5853059-5854906 REVERSE LENGTH=1125
AT3G17210	DUG_dry_6	DUG_26_48	Symbols: ATHS1, HS1 | heat stable protein 1 | chr3:5882284-5883200 FORWARD LENGTH=668
AT3G23600	DUG_dry_6	DUG_26_48	Symbols: | alpha/beta-Hydrolases superfamily protein | chr3:8473775-8475858 FORWARD LENGTH=981
AT3G26618	DUG_dry_6	DUG_26_48	Symbols: ERF1-3 | eukaryotic release factor 1-3 | chr3:9788605-9790351 FORWARD LENGTH=1581
AT3G27160	DUG_dry_6	DUG_26_48	Symbols: GHS1 | Ribosomal protein S21 family protein | chr3:10017476-10019090 FORWARD LENGTH=843
AT3G44590	DUG_dry_6	DUG_26_48	Symbols: | 60S acidic ribosomal protein family | chr3:16163817-16164931 FORWARD LENGTH=681
AT3G44890	DUG_dry_6	DUG_26_48	Symbols: RPL9 | ribosomal protein L9 | chr3:16386434-16388466 FORWARD LENGTH=920
AT3G45030	DUG_dry_6	DUG_26_48	Symbols: | Ribosomal protein S10p/S20e family protein | chr3:16471386-16472393 REVERSE LENGTH=676
AT3G46010	DUG_dry_6	DUG_26_48	Symbols: ADF1, atadf, ATADF1 | actin depolymerizing factor 1 | chr3:16909363-16910814 REVERSE LENGTH=905
AT3G49010	DUG_dry_6	DUG_26_48	Symbols: ATBBC1, BBC1, RSU2 | breast basic conserved 1 | chr3:18166769-18168580 REVERSE LENGTH=891
AT3G49470	DUG_dry_6	DUG_26_48	Symbols: NACA2 | nascent polypeptide-associated complex subunit alpha-like protein 2 | chr3:18340976-18342489 FORWARD LENGTH=966
AT3G51160	DUG_dry_6	DUG_26_48	Symbols: MUR1, MUR_1, GMD2 | NAD(P)-binding Rossmann-fold superfamily protein | chr3:19007010-19008427 REVERSE LENGTH=1418
AT3G52300	DUG_dry_6	DUG_26_48	Symbols: ATPQ | ATP synthase D chain, mitochondrial | chr3:19396565-19398377 FORWARD LENGTH=889
AT3G52880	DUG_dry_6	DUG_26_48	Symbols: ATMDAR1, MDAR1 | monodehydroascorbate reductase 1 | chr3:19601212-19604454 REVERSE LENGTH=1658
AT3G53110	DUG_dry_6	DUG_26_48	Symbols: LOS4 | P-loop containing nucleoside triphosphate hydrolases superfamily protein | chr3:19687740-19690661 FORWARD LENGTH=1860
AT3G53460	DUG_dry_6	DUG_26_48	Symbols: CP29 | chloroplast RNA-binding protein 29 | chr3:19819185-19821519 REVERSE LENGTH=1569
AT3G53890	DUG_dry_6	DUG_26_48	Symbols: | Ribosomal protein S21e | chr3:19955344-19956345 REVERSE LENGTH=550
AT3G53900	DUG_dry_6	DUG_26_48	Symbols: UPP, PYRR | uracil phosphoribosyltransferase | chr3:19956656-19958845 REVERSE LENGTH=1100
AT3G55280	DUG_dry_6	DUG_26_48	Symbols: RPL23AB | ribosomal protein L23AB | chr3:20500335-20501709 FORWARD LENGTH=755
AT3G60245	DUG_dry_6	DUG_26_48	Symbols: | Zinc-binding ribosomal protein family protein | chr3:22268746-22270006 FORWARD LENGTH=592
AT3G61440	DUG_dry_6	DUG_26_48	Symbols: ATCYSC1, ARATH;BSAS3;1, CYSC1 | cysteine synthase C1 | chr3:22735747-22737980 FORWARD LENGTH=1433
AT3G62250	DUG_dry_6	DUG_26_48	Symbols: UBQ5 | ubiquitin 5 | chr3:23037094-23037797 FORWARD LENGTH=704
AT4G02580	DUG_dry_6	DUG_26_48	Symbols: | NADH-ubiquinone oxidoreductase 24 kDa subunit, putative | chr4:1134467-1137156 FORWARD LENGTH=1137
AT4G02770	DUG_dry_6	DUG_26_48	Symbols: PSAD-1 | photosystem I subunit D-1 | chr4:1229111-1229945 REVERSE LENGTH=835
AT4G04640	DUG_dry_6	DUG_26_48	Symbols: ATPC1 | ATPase, F1 complex, gamma subunit protein | chr4:2350498-2352018 REVERSE LENGTH=1521
AT4G09040	DUG_dry_6	DUG_26_48	Symbols: | RNA-binding (RRM/RBD/RNP motifs) family protein | chr4:5794529-5797375 REVERSE LENGTH=1443
AT4G09650	DUG_dry_6	DUG_26_48	Symbols: ATPD | ATP synthase delta-subunit gene | chr4:6100743-6101708 FORWARD LENGTH=966
AT4G11010	DUG_dry_6	DUG_26_48	Symbols: NDPK3 | nucleoside diphosphate kinase 3 | chr4:6732580-6734361 REVERSE LENGTH=980
AT4G11150	DUG_dry_6	DUG_26_48	Symbols: TUF, emb2448, TUFF, VHA-E1 | vacuolar ATP synthase subunit E1 | chr4:6799935-6801932 FORWARD LENGTH=1085
AT4G12910	DUG_dry_6	DUG_26_48	Symbols: scpl20 | serine carboxypeptidase-like 20 | chr4:7550433-7553332 REVERSE LENGTH=1918
AT4G17520	DUG_dry_6	DUG_26_48	Symbols: | Hyaluronan / mRNA binding family | chr4:9771297-9773592 FORWARD LENGTH=1561
AT4G18040	DUG_dry_6	DUG_26_48	Symbols: EIF4E, CUM1, AT.EIF4E1, eIF4E1 | eukaryotic translation initiation factor 4E | chr4:10016567-10018228 REVERSE LENGTH=942
AT4G20260	DUG_dry_6	DUG_26_48	Symbols: ATPCAP1, PCAP1 | plasma-membrane associated cation-binding protein 1 | chr4:10940746-10943495 FORWARD LENGTH=1043
AT4G25370	DUG_dry_6	DUG_26_48	Symbols: | Double Clp-N motif protein | chr4:12972708-12974870 FORWARD LENGTH=1046
AT4G26840	DUG_dry_6	DUG_26_48	Symbols: SUM1, SUMO 1, SUMO1, ATSUMO1 | small ubiquitin-like modifier 1 | chr4:13497326-13498730 FORWARD LENGTH=715
AT4G28440	DUG_dry_6	DUG_26_48	Symbols: | Nucleic acid-binding, OB-fold-like protein | chr4:14059988-14061386 FORWARD LENGTH=944
AT4G29830	DUG_dry_6	DUG_26_48	Symbols: VIP3 | Transducin/WD40 repeat-like superfamily protein | chr4:14597661-14599300 FORWARD LENGTH=1176
AT4G31700	DUG_dry_6	DUG_26_48	Symbols: RPS6, RPS6A | ribosomal protein S6 | chr4:15346072-15347725 REVERSE LENGTH=885
AT4G34555	DUG_dry_6	DUG_26_48	Symbols: | Ribosomal protein S25 family protein | chr4:16504230-16505472 REVERSE LENGTH=611
AT4G35000	DUG_dry_6	DUG_26_48	Symbols: APX3 | ascorbate peroxidase 3 | chr4:16664822-16667718 REVERSE LENGTH=1226
AT4G36880	DUG_dry_6	DUG_26_48	Symbols: CP1 | cysteine proteinase1 | chr4:17374458-17376225 REVERSE LENGTH=1410
AT4G38970	DUG_dry_6	DUG_26_48	Symbols: FBA2 | fructose-bisphosphate aldolase 2 | chr4:18163496-18165740 REVERSE LENGTH=1500
AT5G02960	DUG_dry_6	DUG_26_48	Symbols: | Ribosomal protein S12/S23 family protein | chr5:693079-694515 REVERSE LENGTH=749
AT5G03630	DUG_dry_6	DUG_26_48	Symbols: ATMDAR2 | Pyridine nucleotide-disulphide oxidoreductase family protein | chr5:922166-924683 REVERSE LENGTH=1587
AT5G04740	DUG_dry_6	DUG_26_48	Symbols: | ACT domain-containing protein | chr5:1368542-1371480 REVERSE LENGTH=1166
AT5G13510	DUG_dry_6	DUG_26_48	Symbols: | Ribosomal protein L10 family protein | chr5:4341262-4342095 FORWARD LENGTH=834
AT5G13850	DUG_dry_6	DUG_26_48	Symbols: NACA3 | nascent polypeptide-associated complex subunit alpha-like protein 3 | chr5:4471277-4472855 FORWARD LENGTH=878
AT5G14320	DUG_dry_6	DUG_26_48	Symbols: | Ribosomal protein S13/S18 family | chr5:4617650-4618912 REVERSE LENGTH=1066
AT5G14800	DUG_dry_6	DUG_26_48	Symbols: P5CR, AT-P5R, AT-P5C1, EMB2772 | pyrroline-5- carboxylate (P5C) reductase | chr5:4785960-4787839 REVERSE LENGTH=1282
AT5G15200	DUG_dry_6	DUG_26_48	Symbols: | Ribosomal protein S4 | chr5:4934883-4936408 REVERSE LENGTH=912
AT5G17920	DUG_dry_6	DUG_26_48	Symbols: ATCIMS, ATMETS, ATMS1 | Cobalamin-independent synthase family protein | chr5:5935038-5939487 FORWARD LENGTH=2771
AT5G19760	DUG_dry_6	DUG_26_48	Symbols: | Mitochondrial substrate carrier family protein | chr5:6679306-6682001 REVERSE LENGTH=1338
AT5G20250	DUG_dry_6	DUG_26_48	Symbols: DIN10 | Raffinose synthase family protein | chr5:6833659-6836782 FORWARD LENGTH=2737
AT5G20720	DUG_dry_6	DUG_26_48	Symbols: CPN20 | chaperonin 20 | chr5:7014669-7016698 FORWARD LENGTH=980
AT5G22650	DUG_dry_6	DUG_26_48	Symbols: HD2B, HDT02, HDT2, ATHD2B, HDA4, HD2, ATHD2 | histone deacetylase 2B | chr5:7534017-7536273 FORWARD LENGTH=1243
AT5G23900	DUG_dry_6	DUG_26_48	Symbols: | Ribosomal protein L13e family protein | chr5:8063985-8065523 REVERSE LENGTH=856
AT5G28500	DUG_dry_6	DUG_26_48	Symbols: | unknown protein; BEST Arabidopsis thaliana protein match is: unknown protein (TAIR:AT3G04550.1). | chr5:10477771-10479384 FORWARD LENGTH=1288
AT5G35620	DUG_dry_6	DUG_26_48	Symbols: LSP1, EIF(ISO)4E, LSP, EIF4E2, eIFiso4E | Eukaryotic initiation factor 4E protein | chr5:13824705-13826391 REVERSE LENGTH=898
AT5G38480	DUG_dry_6	DUG_26_48	Symbols: GRF3, RCI1 | general regulatory factor 3 | chr5:15409697-15411516 FORWARD LENGTH=1138
AT5G39570	DUG_dry_6	DUG_26_48	Symbols: | FUNCTIONS IN: molecular_function unknown; INVOLVED IN: biological_process unknown; LOCATED IN: cytosol, nucleus; EXPRESSED IN: 25 plant structures; EXPRESSED DURING: 14 growth stages; BEST Arabidopsis thaliana protein match is: glycine-rich protein (TAIR:AT3G29075.1); Has 30201 Blast hits to 17322 proteins in 780 species: Archae - 12; Bacteria - 1396; Metazoa - 17338; Fungi - 3422; Pla…
AT5G39580	DUG_dry_6	DUG_26_48	Symbols: | Peroxidase superfamily protein | chr5:15847078-15849108 REVERSE LENGTH=1245
AT5G41520	DUG_dry_6	DUG_26_48	Symbols: | RNA binding Plectin/S10 domain-containing protein | chr5:16609153-16610692 REVERSE LENGTH=874
AT5G41670	DUG_dry_6	DUG_26_48	Symbols: | 6-phosphogluconate dehydrogenase family protein | chr5:16665283-16667171 REVERSE LENGTH=1813
AT5G41970	DUG_dry_6	DUG_26_48	Symbols: | Metal-dependent protein hydrolase | chr5:16791182-16793257 FORWARD LENGTH=1434
AT5G43830	DUG_dry_6	DUG_26_48	Symbols: | Aluminium induced protein with YGL and LRDR motifs | chr5:17622336-17624329 REVERSE LENGTH=1103
AT5G46430	DUG_dry_6	DUG_26_48	Symbols: | Ribosomal protein L32e | chr5:18833267-18834564 FORWARD LENGTH=602
AT5G47930	DUG_dry_6	DUG_26_48	Symbols: | Zinc-binding ribosomal protein family protein | chr5:19406163-19407400 REVERSE LENGTH=586
AT5G51110	DUG_dry_6	DUG_26_48	Symbols: | Transcriptional coactivator/pterin dehydratase | chr5:20778132-20779464 REVERSE LENGTH=850
AT5G53400	DUG_dry_6	DUG_26_48	Symbols: BOB1 | HSP20-like chaperones superfamily protein | chr5:21661445-21663572 FORWARD LENGTH=1247
AT5G54160	DUG_dry_6	DUG_26_48	Symbols: ATOMT1, OMT1 | O-methyltransferase 1 | chr5:21981996-21984363 FORWARD LENGTH=1367
AT5G54500	DUG_dry_6	DUG_26_48	Symbols: FQR1 | flavodoxin-like quinone reductase 1 | chr5:22124511-22126504 FORWARD LENGTH=1026
AT5G54600	DUG_dry_6	DUG_26_48	Symbols: | Translation protein SH3-like family protein | chr5:22182978-22184567 FORWARD LENGTH=772
AT5G57020	DUG_dry_6	DUG_26_48	Symbols: NMT1, ATNMT1 | myristoyl-CoA:protein N-myristoyltransferase | chr5:23074867-23076901 FORWARD LENGTH=1720
AT5G58250	DUG_dry_6	DUG_26_48	Symbols: | unknown protein; FUNCTIONS IN: molecular_function unknown; INVOLVED IN: biological_process unknown; LOCATED IN: thylakoid, chloroplast; EXPRESSED IN: 22 plant structures; EXPRESSED DURING: 14 growth stages; CONTAINS InterPro DOMAIN/s: Protein of unknown function DUF2488 (InterPro:IPR019616); Has 1807 Blast hits to 1807 proteins in 277 species: Archae - 0; Bacteria - 0; Metazoa - 736; F…
AT5G61170	DUG_dry_6	DUG_26_48	Symbols: | Ribosomal protein S19e family protein | chr5:24611086-24612427 FORWARD LENGTH=729
AT5G63810	DUG_dry_6	DUG_26_48	Symbols: BGAL10 | beta-galactosidase 10 | chr5:25537074-25541529 FORWARD LENGTH=2608
AT5G63980	DUG_dry_6	DUG_26_48	Symbols: SAL1, ALX8, ATSAL1, HOS2, FRY1, RON1 | Inositol monophosphatase family protein | chr5:25609812-25611933 FORWARD LENGTH=1383
AT5G65020	DUG_dry_6	DUG_26_48	Symbols: ANNAT2 | annexin 2 | chr5:25973815-25975726 FORWARD LENGTH=1226
AT5G66570	DUG_dry_6	DUG_26_48	Symbols: PSBO-1, OEE1, OEE33, OE33, PSBO1, MSP-1 | PS II oxygen-evolving complex 1 | chr5:26568653-26570278 FORWARD LENGTH=1244
AT1G01050	DUG_dry_6	DUG_48_72	Symbols: AtPPa1, PPa1 | pyrophosphorylase 1 | chr1:31170-33153 REVERSE LENGTH=976
AT1G02930	DUG_dry_6	DUG_48_72	Symbols: ATGSTF6, GST1, ERD11, ATGSTF3, GSTF6, ATGST1 | glutathione S-transferase 6 | chr1:661177-662427 REVERSE LENGTH=1049
AT1G04850	DUG_dry_6	DUG_48_72	Symbols: | ubiquitin-associated (UBA)/TS-N domain-containing protein | chr1:1365118-1368844 REVERSE LENGTH=1573
AT1G09340	DUG_dry_6	DUG_48_72	Symbols: CRB, CSP41B, HIP1.3 | chloroplast RNA binding | chr1:3015328-3018234 FORWARD LENGTH=1481
AT1G20580	DUG_dry_6	DUG_48_72	Symbols: | Small nuclear ribonucleoprotein family protein | chr1:7128884-7130642 FORWARD LENGTH=762
AT1G22840	DUG_dry_6	DUG_48_72	Symbols: CYTC-1, ATCYTC-A | CYTOCHROME C-1 | chr1:8079287-8080574 FORWARD LENGTH=730
AT1G30690	DUG_dry_6	DUG_48_72	Symbols: | Sec14p-like phosphatidylinositol transfer family protein | chr1:10887607-10890332 FORWARD LENGTH=2122
AT1G72150	DUG_dry_6	DUG_48_72	Symbols: PATL1 | PATELLIN 1 | chr1:27148460-27150980 FORWARD LENGTH=2148
AT2G03870	DUG_dry_6	DUG_48_72	Symbols: | Small nuclear ribonucleoprotein family protein | chr2:1179984-1181437 FORWARD LENGTH=669
AT2G24020	DUG_dry_6	DUG_48_72	Symbols: | Uncharacterised BCR, YbaB family COG0718 | chr2:10217641-10219396 REVERSE LENGTH=898
AT2G25670	DUG_dry_6	DUG_48_72	Symbols: | BEST Arabidopsis thaliana protein match is: copper ion binding (TAIR:AT4G32610.1); Has 43784 Blast hits to 26928 proteins in 1799 species: Archae - 86; Bacteria - 6347; Metazoa - 15971; Fungi - 5398; Plants - 1931; Viruses - 259; Other Eukaryotes - 13792 (source: NCBI BLink). | chr2:10928664-10931057 REVERSE LENGTH=1793
AT2G25840	DUG_dry_6	DUG_48_72	Symbols: OVA4 | Nucleotidylyl transferase superfamily protein | chr2:11021848-11025370 FORWARD LENGTH=1515
AT2G35605	DUG_dry_6	DUG_48_72	Symbols: | SWIB/MDM2 domain superfamily protein | chr2:14946063-14947276 FORWARD LENGTH=677
AT2G41680	DUG_dry_6	DUG_48_72	Symbols: NTRC | NADPH-dependent thioredoxin reductase C | chr2:17376155-17379055 REVERSE LENGTH=1811
AT2G43560	DUG_dry_6	DUG_48_72	Symbols: | FKBP-like peptidyl-prolyl cis-trans isomerase family protein | chr2:18073859-18075498 REVERSE LENGTH=921
AT2G47400	DUG_dry_6	DUG_48_72	Symbols: CP12-1, CP12 | CP12 domain-containing protein 1 | chr2:19446854-19447438 FORWARD LENGTH=585
AT3G04790	DUG_dry_6	DUG_48_72	Symbols: | Ribose 5-phosphate isomerase, type A protein | chr3:1313316-1315243 FORWARD LENGTH=1928
AT3G10090	DUG_dry_6	DUG_48_72	Symbols: | Nucleic acid-binding, OB-fold-like protein | chr3:3108810-3110026 REVERSE LENGTH=449
AT3G52960	DUG_dry_6	DUG_48_72	Symbols: | Thioredoxin superfamily protein | chr3:19639668-19640619 FORWARD LENGTH=952
AT4G05450	DUG_dry_6	DUG_48_72	Symbols: ATMFDX1, MFDX1 | mitochondrial ferredoxin 1 | chr4:2758653-2760912 FORWARD LENGTH=1166
AT4G14960	DUG_dry_6	DUG_48_72	Symbols: TUA6 | Tubulin/FtsZ family protein | chr4:8548492-8550430 REVERSE LENGTH=1656
AT4G30160	DUG_dry_6	DUG_48_72	Symbols: VLN4, ATVLN4 | villin 4 | chr4:14753349-14760189 FORWARD LENGTH=3993
AT4G39090	DUG_dry_6	DUG_48_72	Symbols: RD19, RD19A | Papain family cysteine protease | chr4:18215556-18217482 REVERSE LENGTH=1533
AT4G39150	DUG_dry_6	DUG_48_72	Symbols: | DNAJ heat shock N-terminal domain-containing protein | chr4:18233485-18235843 REVERSE LENGTH=1226
AT5G01650	DUG_dry_6	DUG_48_72	Symbols: | Tautomerase/MIF superfamily protein | chr5:242550-244111 REVERSE LENGTH=610
AT5G02790	DUG_dry_6	DUG_48_72	Symbols: GSTL3 | Glutathione S-transferase family protein | chr5:632796-635125 FORWARD LENGTH=1056
AT5G09620	DUG_dry_6	DUG_48_72	Symbols: | Octicosapeptide/Phox/Bem1p family protein | chr5:2983449-2985435 REVERSE LENGTH=1987
AT5G09650	DUG_dry_6	DUG_48_72	Symbols: AtPPa6, PPa6 | pyrophosphorylase 6 | chr5:2991149-2993213 REVERSE LENGTH=1181
AT5G12110	DUG_dry_6	DUG_48_72	Symbols: | Glutathione S-transferase, C-terminal-like;Translation elongation factor EF1B/ribosomal protein S6 | chr5:3914468-3915968 FORWARD LENGTH=938
AT5G14910	DUG_dry_6	DUG_48_72	Symbols: | Heavy metal transport/detoxification superfamily protein | chr5:4823714-4825373 FORWARD LENGTH=815
AT5G16390	DUG_dry_6	DUG_48_72	Symbols: CAC1, CAC1A, BCCP, BCCP1, CAC1-A, BCCP-1 | chloroplastic acetylcoenzyme A carboxylase 1 | chr5:5360806-5363126 REVERSE LENGTH=1469
AT5G20400	DUG_dry_6	DUG_48_72	Symbols: | 2-oxoglutarate (2OG) and Fe(II)-dependent oxygenase superfamily protein | chr5:6894844-6896349 FORWARD LENGTH=1238
AT5G27770	DUG_dry_6	DUG_48_72	Symbols: | Ribosomal L22e protein family | chr5:9835885-9837341 FORWARD LENGTH=700
AT5G37475	DUG_dry_6	DUG_48_72	Symbols: | Translation initiation factor eIF3 subunit | chr5:14866057-14868741 REVERSE LENGTH=1141
AT5G47190	DUG_dry_6	DUG_48_72	Symbols: | Ribosomal protein L19 family protein | chr5:19164246-19166107 REVERSE LENGTH=919
AT5G51120	DUG_dry_6	DUG_48_72	Symbols: PABN1, ATPABN1 | polyadenylate-binding protein 1 | chr5:20779680-20781530 FORWARD LENGTH=1053
AT5G60980	DUG_dry_6	DUG_48_72	Symbols: | Nuclear transport factor 2 (NTF2) family protein with RNA binding (RRM-RBD-RNP motifs) domain | chr5:24543360-24546269 FORWARD LENGTH=1745
AT5G67590	DUG_dry_6	DUG_48_72	Symbols: FRO1 | NADH-ubiquinone oxidoreductase-related | chr5:26958001-26959557 FORWARD LENGTH=738
AT1G01320	DUG_6_26	DUG_26_48	Symbols: | Tetratricopeptide repeat (TPR)-like superfamily protein | chr1:121067-130577 REVERSE LENGTH=6049
AT1G02640	DUG_6_26	DUG_26_48	Symbols: BXL2, ATBXL2 | beta-xylosidase 2 | chr1:564205-567769 FORWARD LENGTH=2584
AT1G06680	DUG_6_26	DUG_26_48	Symbols: PSBP-1, OEE2, PSII-P, OE23 | photosystem II subunit P-1 | chr1:2047825-2049418 FORWARD LENGTH=1139
AT1G08520	DUG_6_26	DUG_26_48	Symbols: ALB1, ALB-1V, V157, PDE166, CHLD | ALBINA 1 | chr1:2696412-2700959 FORWARD LENGTH=2549
AT1G09200	DUG_6_26	DUG_26_48	Symbols: | Histone superfamily protein | chr1:2971593-2972199 REVERSE LENGTH=607
AT1G09210	DUG_6_26	DUG_26_48	Symbols: CRT1b, AtCRT1b | calreticulin 1b | chr1:2972842-2976750 REVERSE LENGTH=1745
AT1G09310	DUG_6_26	DUG_26_48	Symbols: | Protein of unknown function, DUF538 | chr1:3009055-3009880 FORWARD LENGTH=826
AT1G11580	DUG_6_26	DUG_26_48	Symbols: ATPMEPCRA, PMEPCRA | methylesterase PCR A | chr1:3888690-3890811 FORWARD LENGTH=1876
AT1G14810	DUG_6_26	DUG_26_48	Symbols: | semialdehyde dehydrogenase family protein | chr1:5102424-5104695 REVERSE LENGTH=1450
AT1G20440	DUG_6_26	DUG_26_48	Symbols: COR47, RD17, AtCOR47 | cold-regulated 47 | chr1:7084409-7085772 REVERSE LENGTH=1219
AT1G30120	DUG_6_26	DUG_26_48	Symbols: PDH-E1 BETA | pyruvate dehydrogenase E1 beta | chr1:10584160-10586635 REVERSE LENGTH=1569
AT1G47128	DUG_6_26	DUG_26_48	Symbols: RD21, RD21A | Granulin repeat cysteine protease family protein | chr1:17282825-17285670 REVERSE LENGTH=1764
AT1G47260	DUG_6_26	DUG_26_48	Symbols: APFI, GAMMA CA2 | gamma carbonic anhydrase 2 | chr1:17321173-17323484 REVERSE LENGTH=1185
AT1G48350	DUG_6_26	DUG_26_48	Symbols: | Ribosomal L18p/L5e family protein | chr1:17867204-17868342 FORWARD LENGTH=705
AT1G54000	DUG_6_26	DUG_26_48	Symbols: | GDSL-like Lipase/Acylhydrolase superfamily protein | chr1:20154169-20156419 REVERSE LENGTH=1609
AT1G54410	DUG_6_26	DUG_26_48	Symbols: | dehydrin family protein | chr1:20309775-20310767 REVERSE LENGTH=728
AT1G62750	DUG_6_26	DUG_26_48	Symbols: ATSCO1, ATSCO1/CPEF-G, SCO1 | Translation elongation factor EFG/EF2 protein | chr1:23233434-23236447 REVERSE LENGTH=2666
AT1G62780	DUG_6_26	DUG_26_48	Symbols: | unknown protein; FUNCTIONS IN: molecular_function unknown; INVOLVED IN: biological_process unknown; LOCATED IN: chloroplast, chloroplast stroma; EXPRESSED IN: 22 plant structures; EXPRESSED DURING: 14 growth stages; Has 94 Blast hits to 94 proteins in 35 species: Archae - 6; Bacteria - 10; Metazoa - 21; Fungi - 2; Plants - 48; Viruses - 0; Other Eukaryotes - 7 (source: NCBI BLink). | c…
AT1G66270	DUG_6_26	DUG_26_48	Symbols: BGLU21 | Glycosyl hydrolase superfamily protein | chr1:24699990-24703041 REVERSE LENGTH=1735
AT1G70830	DUG_6_26	DUG_26_48	Symbols: MLP28 | MLP-like protein 28 | chr1:26709947-26711462 REVERSE LENGTH=1329
AT1G78630	DUG_6_26	DUG_26_48	Symbols: emb1473 | Ribosomal protein L13 family protein | chr1:29575956-29577658 FORWARD LENGTH=1019
AT2G04400	DUG_6_26	DUG_26_48	Symbols: | Aldolase-type TIM barrel family protein | chr2:1531148-1533737 FORWARD LENGTH=1428
AT2G17560	DUG_6_26	DUG_26_48	Symbols: HMGB4, NFD4, NFD04 | high mobility group B4 | chr2:7642165-7643526 REVERSE LENGTH=796
AT2G19590	DUG_6_26	DUG_26_48	Symbols: ACO1, ATACO1 | ACC oxidase 1 | chr2:8475966-8477502 REVERSE LENGTH=1354
AT2G20610	DUG_6_26	DUG_26_48	Symbols: SUR1, HLS3, RTY, ALF1, RTY1 | Tyrosine transaminase family protein | chr2:8877960-8880388 REVERSE LENGTH=1669
AT2G30870	DUG_6_26	DUG_26_48	Symbols: ATGSTF10, ERD13, ATGSTF4, GSTF10 | glutathione S-transferase PHI 10 | chr2:13141357-13142613 FORWARD LENGTH=1002
AT2G33800	DUG_6_26	DUG_26_48	Symbols: | Ribosomal protein S5 family protein | chr2:14300772-14302430 REVERSE LENGTH=1143
AT2G35370	DUG_6_26	DUG_26_48	Symbols: GDCH | glycine decarboxylase complex H | chr2:14891102-14892218 FORWARD LENGTH=803
AT2G38540	DUG_6_26	DUG_26_48	Symbols: LP1, LTP1, ATLTP1 | lipid transfer protein 1 | chr2:16130350-16131174 FORWARD LENGTH=706
AT2G39310	DUG_6_26	DUG_26_48	Symbols: | jacalin-related lectin 22 | chr2:16414073-16416737 REVERSE LENGTH=1601
AT2G39730	DUG_6_26	DUG_26_48	Symbols: RCA | rubisco activase | chr2:16570746-16573519 REVERSE LENGTH=1928
AT2G40490	DUG_6_26	DUG_26_48	Symbols: HEME2 | Uroporphyrinogen decarboxylase | chr2:16912845-16915177 FORWARD LENGTH=1490
AT2G43030	DUG_6_26	DUG_26_48	Symbols: | Ribosomal protein L3 family protein | chr2:17894836-17895866 FORWARD LENGTH=1031
AT2G43910	DUG_6_26	DUG_26_48	Symbols: ATHOL1, HOL1 | HARMLESS TO OZONE LAYER 1 | chr2:18184461-18187028 REVERSE LENGTH=958
AT3G03780	DUG_6_26	DUG_26_48	Symbols: ATMS2, MS2 | methionine synthase 2 | chr3:957085-960980 FORWARD LENGTH=2613
AT3G14220	DUG_6_26	DUG_26_48	Symbols: | GDSL-like Lipase/Acylhydrolase superfamily protein | chr3:4732893-4734609 FORWARD LENGTH=1364
AT3G14420	DUG_6_26	DUG_26_48	Symbols: | Aldolase-type TIM barrel family protein | chr3:4821523-4824152 FORWARD LENGTH=1489
AT3G15640	DUG_6_26	DUG_26_48	Symbols: | Rubredoxin-like superfamily protein | chr3:5299110-5301745 FORWARD LENGTH=1065
AT3G15950	DUG_6_26	DUG_26_48	Symbols: NAI2 | DNA topoisomerase-related | chr3:5397569-5402652 REVERSE LENGTH=2461
AT3G16400	DUG_6_26	DUG_26_48	Symbols: ATMLP-470 | nitrile specifier protein 1 | chr3:5566367-5568545 FORWARD LENGTH=1777
AT3G16450	DUG_6_26	DUG_26_48	Symbols: | Mannose-binding lectin superfamily protein | chr3:5588394-5590055 FORWARD LENGTH=1282
AT3G16460	DUG_6_26	DUG_26_48	Symbols: | Mannose-binding lectin superfamily protein | chr3:5592582-5595710 FORWARD LENGTH=2415
AT3G25920	DUG_6_26	DUG_26_48	Symbols: RPL15 | ribosomal protein L15 | chr3:9491055-9492635 REVERSE LENGTH=1124
AT3G29360	DUG_6_26	DUG_26_48	Symbols: | UDP-glucose 6-dehydrogenase family protein | chr3:11267091-11269228 REVERSE LENGTH=1790
AT3G44990	DUG_6_26	DUG_26_48	Symbols: XTR8, ATXTR8, XTH31 | xyloglucan endo-transglycosylase-related 8 | chr3:16446975-16448764 REVERSE LENGTH=1273
AT3G48700	DUG_6_26	DUG_26_48	Symbols: ATCXE13, CXE13 | carboxyesterase 13 | chr3:18038648-18039876 REVERSE LENGTH=1229
AT3G48730	DUG_6_26	DUG_26_48	Symbols: GSA2 | glutamate-1-semialdehyde 2,1-aminomutase 2 | chr3:18049614-18051702 FORWARD LENGTH=1654
AT3G52150	DUG_6_26	DUG_26_48	Symbols: | RNA-binding (RRM/RBD/RNP motifs) family protein | chr3:19342024-19343448 FORWARD LENGTH=1064
AT3G52380	DUG_6_26	DUG_26_48	Symbols: CP33, PDE322 | chloroplast RNA-binding protein 33 | chr3:19421397-19423097 FORWARD LENGTH=1454
AT3G52750	DUG_6_26	DUG_26_48	Symbols: FTSZ2-2 | Tubulin/FtsZ family protein | chr3:19549661-19553014 REVERSE LENGTH=1773
AT3G53580	DUG_6_26	DUG_26_48	Symbols: | diaminopimelate epimerase family protein | chr3:19864757-19867134 FORWARD LENGTH=1343
AT3G59760	DUG_6_26	DUG_26_48	Symbols: OASC, ATCS-C | O-acetylserine (thiol) lyase isoform C | chr3:22071948-22075416 REVERSE LENGTH=1544
AT3G59970	DUG_6_26	DUG_26_48	Symbols: MTHFR1 | methylenetetrahydrofolate reductase 1 | chr3:22151195-22154483 FORWARD LENGTH=2047
AT3G62030	DUG_6_26	DUG_26_48	Symbols: ROC4 | rotamase CYP 4 | chr3:22973004-22975378 FORWARD LENGTH=1181
AT3G63190	DUG_6_26	DUG_26_48	Symbols: RRF, HFP108, cpRRF, AtcpRRF | ribosome recycling factor, chloroplast precursor | chr3:23342582-23344773 REVERSE LENGTH=1240
AT4G01310	DUG_6_26	DUG_26_48	Symbols: | Ribosomal L5P family protein | chr4:543970-545547 REVERSE LENGTH=1052
AT4G01700	DUG_6_26	DUG_26_48	Symbols: | Chitinase family protein | chr4:732313-733510 REVERSE LENGTH=966
AT4G18480	DUG_6_26	DUG_26_48	Symbols: CHLI1, CH42, CH-42, CHL11, CHLI-1 | P-loop containing nucleoside triphosphate hydrolases superfamily protein | chr4:10201672-10203469 REVERSE LENGTH=1608
AT4G24190	DUG_6_26	DUG_26_48	Symbols: SHD, AtHsp90.7, AtHsp90-7 | Chaperone protein htpG family protein | chr4:12551721-12555905 REVERSE LENGTH=2707
AT4G26900	DUG_6_26	DUG_26_48	Symbols: AT-HF, HISN4 | HIS HF | chr4:13515478-13519855 FORWARD LENGTH=2062
AT4G27440	DUG_6_26	DUG_26_48	Symbols: PORB | protochlorophyllide oxidoreductase B | chr4:13725546-13727352 FORWARD LENGTH=1446
AT4G28750	DUG_6_26	DUG_26_48	Symbols: PSAE-1 | Photosystem I reaction centre subunit IV / PsaE protein | chr4:14202758-14203961 REVERSE LENGTH=698
AT4G29060	DUG_6_26	DUG_26_48	Symbols: emb2726 | elongation factor Ts family protein | chr4:14317256-14321567 FORWARD LENGTH=2616
AT4G30290	DUG_6_26	DUG_26_48	Symbols: ATXTH19, XTH19 | xyloglucan endotransglucosylase/hydrolase 19 | chr4:14828712-14830016 REVERSE LENGTH=1127
AT4G39330	DUG_6_26	DUG_26_48	Symbols: ATCAD9, CAD9 | cinnamyl alcohol dehydrogenase 9 | chr4:18291218-18293088 FORWARD LENGTH=1334
AT5G03940	DUG_6_26	DUG_26_48	Symbols: FFC, 54CP, CPSRP54, SRP54CP | chloroplast signal recognition particle 54 kDa subunit | chr5:1060134-1063319 REVERSE LENGTH=1888
AT5G08280	DUG_6_26	DUG_26_48	Symbols: HEMC | hydroxymethylbilane synthase | chr5:2663499-2665792 REVERSE LENGTH=1609
AT5G08690	DUG_6_26	DUG_26_48	Symbols: | ATP synthase alpha/beta family protein | chr5:2825713-2828662 FORWARD LENGTH=2007
AT5G11880	DUG_6_26	DUG_26_48	Symbols: | Pyridoxal-dependent decarboxylase family protein | chr5:3827526-3829986 REVERSE LENGTH=1794
AT5G23820	DUG_6_26	DUG_26_48	Symbols: | MD-2-related lipid recognition domain-containing protein | chr5:8031268-8033020 FORWARD LENGTH=824
AT5G26280	DUG_6_26	DUG_26_48	Symbols: | TRAF-like family protein | chr5:9208711-9210572 FORWARD LENGTH=1166
AT5G26742	DUG_6_26	DUG_26_48	Symbols: emb1138 | DEAD box RNA helicase (RH3) | chr5:9284979-9288727 REVERSE LENGTH=2525
AT5G27410	DUG_6_26	DUG_26_48	Symbols: | D-aminoacid aminotransferase-like PLP-dependent enzymes superfamily protein | chr5:9676334-9682940 FORWARD LENGTH=3153
AT5G38410	DUG_6_26	DUG_26_48	Symbols: | Ribulose bisphosphate carboxylase (small chain) family protein | chr5:15377173-15378416 REVERSE LENGTH=963
AT5G38430	DUG_6_26	DUG_26_48	Symbols: | Ribulose bisphosphate carboxylase (small chain) family protein | chr5:15384117-15385247 REVERSE LENGTH=808
AT5G39320	DUG_6_26	DUG_26_48	Symbols: | UDP-glucose 6-dehydrogenase family protein | chr5:15742762-15744943 FORWARD LENGTH=1792
AT5G43060	DUG_6_26	DUG_26_48	Symbols: | Granulin repeat cysteine protease family protein | chr5:17269507-17272164 REVERSE LENGTH=1716
AT5G48580	DUG_6_26	DUG_26_48	Symbols: FKBP15-2 | FK506- and rapamycin-binding protein 15 kD-2 | chr5:19695929-19698712 REVERSE LENGTH=1179
AT5G51100	DUG_6_26	DUG_26_48	Symbols: FSD2 | Fe superoxide dismutase 2 | chr5:20773296-20775701 REVERSE LENGTH=1045
[truncated: 176 more rows]

## Sheet: Supplemental Table 5
Term	Count	PValue	Fold Enrichment	FDR	Delay group	Genes
[truncated: 26 more rows]
[truncated: 32 more columns]

[truncated: 4 more sheets: Supplemental Table 6, Supplemental Table 7, Supplemental Table 8, Supplemental Table 9]
